# Supplementary material for: Health inequalities in infectious diseases: a systematic overview of reviews
Source: PubMed Central journal article supplement — BMJ Open. 2023 Apr 4;13(4):e067429. doi: 10.1136/bmjopen-2022-067429 (PMC10083762; doi:10.1136/bmjopen-2022-067429), 2023-04-04
Supplement: bmjopen-2022-067429.draft_revisions.pdf [file bmjopen-2022-067429.draft_revisions.pdf]

# BMJ Open

BMJ Open is committed to open peer review. As part of this commitment we make the peer review history of every article we publish publicly available.

When an article is published we post the peer reviewers' comments and the authors' responses online. We also post the versions of the paper that were used during peer review. These are the versions that the peer review comments apply to.

The versions of the paper that follow are the versions that were submitted during the peer review process. They are not the versions of record or the final published versions. They should not be cited or distributed as the published version of this manuscript.

BMJ Open is an open access journal and the full, final, typeset and author-corrected version of record of the manuscript is available on our site with no access controls, subscription charges or pay-per-view fees (<http://bmjopen.bmj.com>).

If you have any questions on BMJ Open's open peer review process please email [info.bmjopen@bmj.com](mailto:info.bmjopen@bmj.com)

# BMJ Open

## Health Inequalities in Infectious Diseases: A Systematic Overview of Reviews

|                               |                                                                                                                                                                                                                                                                                                                                                                                                                                                                                                                                                                                                                                                                                                                                                              |
|-------------------------------|--------------------------------------------------------------------------------------------------------------------------------------------------------------------------------------------------------------------------------------------------------------------------------------------------------------------------------------------------------------------------------------------------------------------------------------------------------------------------------------------------------------------------------------------------------------------------------------------------------------------------------------------------------------------------------------------------------------------------------------------------------------|
| Journal:                      | <i>BMJ Open</i>                                                                                                                                                                                                                                                                                                                                                                                                                                                                                                                                                                                                                                                                                                                                              |
| Manuscript ID                 | bmjopen-2022-067429                                                                                                                                                                                                                                                                                                                                                                                                                                                                                                                                                                                                                                                                                                                                          |
| Article Type:                 | Original research                                                                                                                                                                                                                                                                                                                                                                                                                                                                                                                                                                                                                                                                                                                                            |
| Date Submitted by the Author: | 15-Aug-2022                                                                                                                                                                                                                                                                                                                                                                                                                                                                                                                                                                                                                                                                                                                                                  |
| Complete List of Authors:     | Ayorinde, Abimbola; University of Warwick, Warwick Medical School<br>Ghosh, Iman; University of Warwick, Warwick Medical School<br>Ali, Ifra; University of Warwick, Warwick Medical School<br>Zahair, Iram; University of Liverpool<br>Olaewaju, Olajumoke; Centre for Communication and Social Impact<br>Singh, Megha; University of Warwick, Warwick Medical School<br>Meehan, Edward; Monash University<br>Anjorin, Seun; University of Warwick, Warwick Medical School<br>Rotheram, Suzanne; University of Liverpool, Institute of Population Health<br>Barr, Ben ; University of Liverpool, Public Health and Policy<br>McCarthy, Noel; Trinity College Dublin, School of Medicine<br>Oyebode, Oyinlola; University of Warwick, Warwick Medical School |
| Keywords:                     | Public health < INFECTIOUS DISEASES, INFECTIOUS DISEASES, Epidemiology < INFECTIOUS DISEASES                                                                                                                                                                                                                                                                                                                                                                                                                                                                                                                                                                                                                                                                 |
|                               |                                                                                                                                                                                                                                                                                                                                                                                                                                                                                                                                                                                                                                                                                                                                                              |

SCHOLARONE™  
Manuscripts

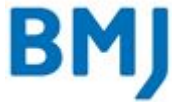

I, the Submitting Author has the right to grant and does grant on behalf of all authors of the Work (as defined in the below author licence), an exclusive licence and/or a non-exclusive licence for contributions from authors who are: i) UK Crown employees; ii) where BMJ has agreed a CC-BY licence shall apply, and/or iii) in accordance with the terms applicable for US Federal Government officers or employees acting as part of their official duties; on a worldwide, perpetual, irrevocable, royalty-free basis to BMJ Publishing Group Ltd ("BMJ") its licensees and where the relevant Journal is co-owned by BMJ to the co-owners of the Journal, to publish the Work in this journal and any other BMJ products and to exploit all rights, as set out in our [licence](#).

The Submitting Author accepts and understands that any supply made under these terms is made by BMJ to the Submitting Author unless you are acting as an employee on behalf of your employer or a postgraduate student of an affiliated institution which is paying any applicable article publishing charge ("APC") for Open Access articles. Where the Submitting Author wishes to make the Work available on an Open Access basis (and intends to pay the relevant APC), the terms of reuse of such Open Access shall be governed by a Creative Commons licence – details of these licences and which [Creative Commons](#) licence will apply to this Work are set out in our licence referred to above.

Other than as permitted in any relevant BMJ Author's Self Archiving Policies, I confirm this Work has not been accepted for publication elsewhere, is not being considered for publication elsewhere and does not duplicate material already published. I confirm all authors consent to publication of this Work and authorise the granting of this licence.

# Health Inequalities in Infectious Diseases: A Systematic Overview of Reviews

Abimbola A Ayorinde<sup>1\*</sup>, Iman Ghosh<sup>1</sup>, Ifra Ali<sup>1</sup>, Iram Zahair<sup>2</sup>, Olajumoke Olarewaju<sup>3</sup>, Megha Singh<sup>1</sup>, Edward Meehan<sup>4</sup>, Seun S Anjorin<sup>1</sup>, Suzanne Rotheram<sup>2</sup>, Benjamin Barr<sup>2</sup>, Noel McCarthy<sup>5</sup>, Oyinlola Oyeboode<sup>1</sup>

<sup>1</sup>Warwick Medical School, University of Warwick, Coventry, United Kingdom

<sup>2</sup>Institute of Population Health, University of Liverpool, Liverpool, United Kingdom

<sup>3</sup>Centre for Communication and Social Impact, Abuja, Nigeria

<sup>4</sup>Monash University, Melbourne, Victoria, Australia

<sup>5</sup>School of Medicine, Trinity College Dublin, Ireland

\*Corresponding Author

Email: [a.ayorinde.1@warwick.ac.uk](mailto:a.ayorinde.1@warwick.ac.uk)

Warwick Medical School, University of Warwick, Coventry, United Kingdom

**Word count:** 3816

**Keywords:** Health inequalities, infectious diseases, protected characteristics, socio-economic, inclusion health

## ABSTRACT:

**Objectives:** The aim of this systematic overview of reviews was to synthesise available evidence on inequalities in infectious disease based on three dimensions of inequalities; inclusion health groups, protected characteristics, and socioeconomic inequalities.

**Methods:** We searched Medline, Embase, Web of Science, Open Grey databases in November 2021. We included reviews published from the year 2000 which examined inequalities in the incidence, prevalence or consequences infectious diseases based on the dimensions of interest. Our search focused on tuberculosis, human immunodeficiency virus, sexually transmitted infections, Hepatitis C, vaccination, and antimicrobial resistance. However, we also included eligible reviews of any other infectious diseases. We appraised the quality of reviews using the Assessment of Multiple Systematic Reviews version 2 (AMSTAR2) checklist. We conducted a narrative data synthesis.

**Results:** We included 108 reviews in our synthesis covering all the dimensions of inequalities for most of the infectious disease topics of interest, but the quality and volume of review evidence and consistency of their findings varied. The existing literature reviews provides strong evidence that people of inclusion health groups and lower socio-economic status are consistently at higher risk of infectious diseases, AMR, and incomplete/delayed vaccination. In the protected characteristics dimension, ethnicity and sexual orientation are important factors contributing to inequalities across the various infectious disease topics included in this overview of reviews.

**Conclusion:** Our findings support the idea that developing targeted interventions for these high-risk groups rather than operating in infectious disease siloes might contribute to reducing infectious disease burden and its impact on health inequalities.

## STRENGTHS AND LIMITATIONS OF THIS STUDY

- The protocol used for this systematic overview of reviews was pre-designed and registered in advance.
- We included 108 reviews covering various dimensions of inequalities across several key infectious diseases, providing a broad overview of inequalities in infectious diseases, especially those relevant to high-income countries.
- The gaps observed in some areas are not necessarily lack of evidence as some primary studies may not have been synthesised in reviews.

For peer review only

## INTRODUCTION

The World Health Organisation regards experiencing the highest possible standard of health as a fundamental human right of every individual regardless of personal or social circumstances.<sup>1</sup> Nevertheless, avoidable inequalities exist in the prevalence of diseases and illnesses, general health status, and access to health care between various social groups.<sup>2</sup> A complex interaction between structural (for example, income and wealth distribution) and individual-level (for example, health behaviours and living conditions) determinants of health contributes to the increased vulnerability to poorer health among particular social groups.<sup>3 4</sup>

Infectious diseases pose a significant health burden with substantial health inequalities globally.<sup>5</sup> In the United Kingdom (UK), infectious diseases constitute 7% of deaths alongside 4% of lost life years.<sup>6</sup> The economic burden of infectious diseases in the UK is estimated to be around £30 billion per year.<sup>6</sup> Although infectious diseases impose substantial, negative health and economic consequences within populations, many infectious diseases are vaccine-preventable and avoidable through adequate control measures.<sup>7</sup> However, some groups remain under vaccinated<sup>8</sup> and other control measures may be difficult or impossible to implement for some, depending on circumstances.<sup>9</sup> Traditionally, policy makers often target infectious diseases individually, but it is known that specific groups are often at higher risks regardless of specific infectious diseases.<sup>10-14</sup> In efforts to tackle the observed disparities and to reduce the burden of infectious diseases, a strategic approach that tackles infectious diseases among high-risk groups is required.<sup>15</sup> To inform the development of needs-tailored public health policies and initiatives to achieve this goal, a comprehensive synthesis of evidence is required, highlighting the inequalities in infectious diseases according to varying personal and social characteristics.

This project was commissioned by Public Health England (PHE) to gain an overview of the available evidence on health inequalities relating to key infectious disease topics in the UK from a population perspective. PHE had specific interest in three dimensions of inequalities; inclusion health groups (socially excluded and vulnerable populations), protected characteristics, and socioeconomic inequalities. The infectious disease topics of interest were TB, HIV, STIs, HCV, vaccination, and antimicrobial resistance (AMR). Therefore, the aim of this systematic overview of reviews was to describe the existing literature, relevant to the UK, relating to inequalities in the prevalence/incidence of key infectious disease topics as specified by PHE.

## METHODS

We conducted a systematic overview of reviews, pre-registered in PROSPERO, an international prospective register of systematic reviews (2020 CRD42020220203 [https://www.crd.york.ac.uk/prospero/display\\_record.php?ID=CRD42020220203](https://www.crd.york.ac.uk/prospero/display_record.php?ID=CRD42020220203)).

### Patient and public involvement

This study had no direct patient or public engagement.

### Search strategy and study selection

We developed a search strategy using synonyms and MeSH terms for inequalities, inclusion health groups, protected characteristics and socioeconomic factors which were combined with synonyms and MeSH terms for infectious diseases and synonyms for reviews (online supplemental file 1 appendix 1). We searched electronic databases from inception to November 2021; Medline, Embase, Web of Science and to identify relevant grey literature we searched Open Grey database (<http://www.opengrey.eu/>) and contacted experts in our network.

We exported citations into Endnote, removed duplicates and then exported them into a web-tool, Rayyan (<https://www.rayyan.ai/>) to facilitate citation screening. Articles were screened against pre-defined eligibility criteria (Table 1). Titles and abstracts were screened by a single reviewer and 10% were double screened by a second reviewer. Full texts of the potentially relevant articles were obtained and screened independently by two reviewers. Discrepancies were resolved by discussion.



Table 1: Eligibility Criteria

| Inclusion Criteria                                                                                                                                                                                                                                                                                                                                                                                                                                                                                                                                                                                                                                                                                                                                                                                                                                                                                                                                                                                                                                                                                                                                                                                                                                                                                          | Exclusion Criteria                                                                                                                                                                                                                                                                                                                                                                                                                                                                                                                                                                                |
|-------------------------------------------------------------------------------------------------------------------------------------------------------------------------------------------------------------------------------------------------------------------------------------------------------------------------------------------------------------------------------------------------------------------------------------------------------------------------------------------------------------------------------------------------------------------------------------------------------------------------------------------------------------------------------------------------------------------------------------------------------------------------------------------------------------------------------------------------------------------------------------------------------------------------------------------------------------------------------------------------------------------------------------------------------------------------------------------------------------------------------------------------------------------------------------------------------------------------------------------------------------------------------------------------------------|---------------------------------------------------------------------------------------------------------------------------------------------------------------------------------------------------------------------------------------------------------------------------------------------------------------------------------------------------------------------------------------------------------------------------------------------------------------------------------------------------------------------------------------------------------------------------------------------------|
| <p><i>Population:</i> Review including studies from the UK population or other high-income countries.</p> <p><i>Exposure:</i></p> <ul style="list-style-type: none"> <li>• Socioeconomic status: this includes education, income, occupation, social class, and deprivation measured at individual or aggregated level.</li> <li>• Protected characteristics: age, disability, gender reassignment, marriage and civil partnership, pregnancy and maternity, race, religion or belief, sex, and sexual orientation.</li> <li>• Inclusion health groups: vulnerable migrants, people experiencing homelessness and rough sleeping, people who engage in sex work, and Gypsy Roma and Traveller communities.</li> </ul> <p><i>Outcome:</i> Inequalities relating to incidence, prevalence, and consequences of infectious diseases. Despite specific interest in TB, HIV, STIs, HCV, immunisation, and AMR, we included reviews relating to any infectious diseases, except reviews focused on COVID-19.</p> <p><i>Types of reviews:</i> Any literature review which reports all the following (a) explicit objectives, (b) clear search strategies and (c) eligibility criteria.</p> <p><i>Publication date:</i> Published from the year 2000 onwards.</p> <p><i>Language:</i> No language restrictions.</p> | <p>We excluded reviews of qualitative studies and articles that are not systematic reviews as defined above. We excluded review protocols, but we searched the titles to check if the findings have been published. We excluded reviews on COVID-19, as advised by PHE, to avoid overlap with other reviews. We also excluded articles focussed on travel-related infections. Reviews which excluded the UK in their eligibility criteria or had not included populations relevant to the UK population (for example, papers where all results were from low-income countries) were excluded.</p> |

## Data extraction

We designed and piloted a data extraction form in Microsoft Excel to extract information including: first author's last name, publication year, corresponding author's country, review methodology,

1  
2  
3 inclusion and exclusion criteria, infectious disease(s), population(s) included, dimension(s) of  
4 inequality, outcomes, conclusions, and strengths and limitations. Data extraction was performed by  
5 one reviewer and checked by another.  
6  
7  
8  
9

## 10 **Quality assessment**

11  
12  
13 Two reviewers independently assessed review quality using the Assessment of Multiple Systematic  
14 Reviews version 2 (AMSTAR2) checklist.<sup>16</sup> Disagreements were resolved by discussion.  
15  
16  
17

## 18 **Data synthesis**

19  
20  
21 We tabulated the dimension of inequalities against the infectious disease topic to create an evidence  
22 matrix which was used to highlight areas where reviews already exist and where there may be gaps.  
23 Data were synthesised narratively based on the dimensions of inequalities.  
24  
25  
26  
27  
28

## 29 **RESULTS**

30  
31  
32 Figure 1 shows the study selection. We retrieved 14713 citations from the electronic database  
33 searches and 11135 titles and abstracts were screened after removal of duplicates. One of the experts  
34 we contacted sent an article which highlighted UK-based evidence for several inclusion health  
35 groups, but did not fulfil other criteria for inclusion<sup>17</sup>. After examining 437 full text articles against  
36 the eligibility criteria, 108 were included in our synthesis.  
37  
38  
39  
40  
41

42  
43 Characteristics of included reviews are summarised in online supplemental file 2. Included reviews  
44 were published between 2005-2020 with 95% published after 2010. Fifty-eight (54%) included meta-  
45 analysis while the remaining studies used narrative/descriptive synthesis approaches. The reviews  
46 covered the three dimensions of inequalities across various infectious disease topics. A summarised  
47 version of the evidence matrix, showing how many reviews were identified for each cell is presented  
48 in Figure 2. The full evidence matrix is presented in online supplemental file 1 appendix 2.  
49  
50  
51  
52  
53  
54  
55  
56  
57  
58  
59  
60

## Methodological quality of included reviews

Assessment of the methodological quality of each included review is presented in online supplemental file 1 appendix 3 and the proportion of included reviews that met each AMSTAR2 Criteria are presented in Figure 3. Many reviews fulfilled criteria such as including components of PICOS in their research questions and inclusion criteria (87%), performing duplicate study selection (55%), discussing heterogeneity (70%) and disclosure of conflicts of interest (83%). Justification of the exclusions for each excluded study were not presented and none reported funding sources for included studies. These two criteria are more common among Cochrane reviews of interventions and generally omitted from most published non-Cochrane reviews.

## Evidence Relating to Inclusion Health Groups

Of the 108 included reviews, 43 reported on inclusion health groups. The evidence is generally consistent across these groups showing that people who belong to inclusion health groups are often at higher risk of infectious diseases, AMR and under-vaccination. For example, many reviews reported on general migrants (21),<sup>14 18-41</sup> and vulnerable migrants such as asylum seekers, refugees, and trafficked sex workers (7).<sup>14 19 22 28 34 42 43</sup> The reviews often reported that migrants have a higher risk of infectious diseases than the host population, though the magnitude of the association may vary for different geographical regions and different infectious diseases. For example, in the UK, 35% of people with chronic HCV are migrants despite being just 9% of the general population.<sup>20</sup> Other reviews showed that HIV and STIs were more prevalent among migrants.<sup>31 32</sup> The prevalence of HIV-TB co-infection was higher among immigrants compared with nationals in various countries including England and Wales although the immigrant group reported slightly better survival/lower mortality which authors commented may be due to the possible healthy migrant effect.<sup>37</sup> In another review, migrants were reported to be at higher risk of TB death.<sup>26</sup> Evidence from the UK showed an increasing number of migrants contracted HIV after they arrived in the UK between 2002-2011 suggesting that the higher prevalence of infectious diseases among migrants is not limited to pre-migration infection.<sup>27</sup> A meta-analysis showed that refugees were more likely to have chronic HBV compared to general migrants (OR 1.42 95% CI 1.01 to 1.99).<sup>34</sup> Some reviews reported no clear evidence that immigrant sex workers had higher risk of HIV and STIs compared with non-migrant sex workers.<sup>40 41</sup> However, one reported that trafficked sex workers were at a higher risk of HIV and STIs compared to female sex workers in general.<sup>43</sup> The prevalence of *Helicobacter pylori* among

1  
2  
3 immigrants varied according to continent of origin and the prevalence is higher among migrants  
4 compared with their children.<sup>29</sup>  
5  
6  
7

8 Several reviews reported lower vaccination rates or delayed/incomplete vaccination among migrants  
9 and refugees in Europe.<sup>25 28 30 36</sup> However, the association may vary depending on the type of migrant  
10 group. For example, authors have reported that the uptake of vaccination among refugees was lower  
11 compared with asylum seekers.<sup>19</sup> In a meta-analysis, migrants had increased odds of MDR-TB  
12 incidence compared to non-migrants (OR 3.91, 95% CI 2.98–5.14).<sup>38</sup> In two other reviews, AMR  
13 carriage and infection were reported to be more prevalent among migrants in Europe.<sup>21 42</sup>  
14  
15  
16  
17  
18  
19

20 Three reviews examined Gypsy Roma and Traveller communities.<sup>8 44 45</sup> One showed that Roma and  
21 Irish Travellers in the UK were often under-vaccinated.<sup>8</sup> Another reported that Roma in Barcelona  
22 had a TB incidence 5.3 times greater than Spain's national TB incidence.<sup>45</sup> Higher prevalence of HIV  
23 has also been reported among Iranian, Roma, and Peruvian Indigenous populations compared to the  
24 general population.<sup>44</sup> We did not identify any reviews that examined the association between being  
25 from Gypsy Roma or Traveller communities and AMR.  
26  
27  
28  
29  
30  
31  
32  
33

34 We identified eight reviews which examined the association of homelessness with infectious  
35 diseases. They all reported higher risk of various infectious diseases or AMR among people  
36 experiencing homelessness compared to those who were not homeless.<sup>26 35 46-51</sup> We did not identify  
37 any reviews that examined the association between vaccination and homelessness. Eight reviews  
38 explored infectious disease risks among those engaging in sex work compared to the general  
39 population.<sup>39 43 52-57</sup> The evidence suggests higher risks of various infectious diseases, such as HBV,  
40 HDV, HIV and HPV, among sex workers.<sup>39 52-54 56 57</sup> A review which examined factors associated  
41 with HBV vaccination among MSM found mixed evidence relating to sexual risk-taking including  
42 involvement in sex-trade.<sup>55</sup> We did not identify any reviews exploring the association of being a sex  
43 worker with AMR.  
44  
45  
46  
47  
48  
49  
50  
51  
52

### 53 **Evidence Relating to Protected Characteristics**

54 Seventy-four reviews reported on protected characteristics, however, our synthesis only found clear  
55 evidence for inequalities by ethnicity and sexual orientation. Inequalities in infectious diseases  
56 relating to race and ethnicity were explored in 19 reviews.<sup>26 30 33 36 49 51 55 58-69</sup> The available evidence  
57 suggests a higher rate of various infectious diseases such as TB, HIV, and STIs and under-  
58  
59  
60

1  
2  
3 vaccination in people who belong to an ethnic minority group. For example, a meta-analysis found  
4 that recent transmission of TB was associated with being of ethnic minority (OR 3.03, 95% CI 2.21-  
5 4.16).<sup>49</sup> A meta-analysis indicated that on average young Black women were less likely to initiate  
6 HPV vaccination than young White women (combined OR: 0.89, 95% CI: 0.82–0.97).<sup>61</sup> In a meta-  
7 analysis of studies from Europe, children from parents of ethnic minorities (compared to the  
8 majority) were less likely to be vaccinated for measles, mumps and rubella (OR 0.89, CI 0.86–0.93  
9 in a fixed effect model).<sup>67</sup> However, the effect disappeared in the random effects model (OR 1.03,  
10 95% CI 0.79–1.34), probably due to heterogeneity between studies.<sup>67</sup> Seasonal influenza vaccine  
11 uptake among older people was associated with being White (combined OR 1.30, 95% CI 1.14–  
12 1.49).<sup>30</sup> Only one review on race and AMR was identified and it reported that people from some  
13 Black ethnic groups in the USA and Europe, and Aboriginal ethnic groups living in Canada and  
14 Australia are less likely to have AMR-Neisseria gonorrhoea (AMR-NG) than the White majority  
15 population.<sup>58</sup> Ten included reviews examined the association of sexual orientation with infectious  
16 disease topics, mostly focused on MSM.<sup>24 51 53 54 56 58 70-73</sup> In a review, MSM were found to be at risk  
17 of acquiring HIV post-migration.<sup>71</sup> However, in a network meta-analysis the highest risk of advanced  
18 HIV disease among people living with HIV was found in those with heterosexual contact compared  
19 with MSM as well as injection drug use.<sup>70</sup> Some reviews examined disparities of HIV in MSM but  
20 did not compare risk between MSM and other populations.<sup>33 64</sup> Other infectious diseases such as  
21 HBV, HCV and HDV are also higher in MSM than in the general population.<sup>24 54 72</sup> AMR-NG was  
22 reported to be more common among MSM compared with heterosexual men in England and Wales  
23 (OR 5.47, 95% CI 3.99–7.48).<sup>58</sup> We did not identify any reviews which assessed the association of  
24 sexual orientation with vaccination.

25  
26  
27  
28  
29  
30  
31  
32  
33  
34  
35  
36  
37  
38  
39  
40  
41  
42  
43 From the reviews identified, inequalities in infectious disease topics based on other protected  
44 characteristics, such as age and sex are mixed, and for other protected characteristics the synthesised  
45 evidence is scant and inconclusive. The association of infectious diseases with age has been reported  
46 in various reviews.<sup>21 22 30 36 49 51 55-60 62 63 65 67 69 74-103</sup>. However, the association varied. Infectious  
47 diseases such as HIV, STIs, and TB have been reported to be associated with younger age in some  
48 reviews,<sup>49 58 76 79 88</sup> while HCV and Hepatitis E (HEV) were associated with older age.<sup>22 82 95</sup> Seasonal  
49 influenza vaccine uptake was higher in older age groups.<sup>30 65 69 100</sup> A review reported that many  
50 studies found an association between HBV vaccination and younger age.<sup>55</sup> Suboptimal vaccination  
51 compliance was associated with mother's younger age.<sup>36 63</sup> On the other hand, another review  
52 reported that HPV vaccine intention and initiation were positively associated with younger parent's  
53 age.<sup>62</sup> Four included reviews examined the association of AMR with age.<sup>21 58 102 103</sup> In one review,

1  
2  
3 MDR TB was associated with being younger than 65 years (pooled OR 2.53, 95% CI 1.74 – 4.83)<sup>21</sup>  
4 while another review reported that AMR-NG was more common in those 25 years or older than in  
5 younger adults.<sup>58</sup> Overall, age group classifications often varied between reviews which made it  
6 difficult to identify a clear pattern.  
7  
8  
9

10  
11  
12 Twenty-eight reviews explored inequalities based on sex,<sup>21 39 40 46 48 49 51 53 58 65 67 74 78 82 84 85 87 89 90 93 96</sup>  
13 <sup>100 104-109</sup> but the findings varied depending on specific infectious disease. For example, TB  
14 transmission was reported to be associated with being male<sup>48 49</sup> while the prevalence of chlamydia  
15 was slightly higher in females than in males.<sup>78</sup> Other reviews reported that seasonal influenza vaccine  
16 uptake is often higher in elderly men compared to elderly women, but the differences are not  
17 statistically significant in multivariate regression analysis.<sup>65</sup> A meta-analysis of studies from Europe  
18 showed that male patients were more likely to have MDR TB (OR 1.38, 95% CI 1.16 – 1.65).<sup>21</sup>  
19  
20  
21  
22  
23  
24

25 Six reviews described the influence of being married or in civil partnerships on vaccination.<sup>25 30 65 67</sup>  
26 <sup>69 96</sup> Generally, those who were married had higher vaccination uptake although some studies found  
27 no association or higher uptake among those who were never married. No included review examined  
28 inequalities in infectious disease prevalence or AMR based on marital status. Only four included  
29 reviews reported the prevalence of infectious diseases (HBV, HCV, latent or acute toxoplasma  
30 infection) in pregnant women compared with the general population and the findings were mixed<sup>22 24</sup>  
31 <sup>56 110</sup> We found no reviews that examined the association of pregnancy with vaccination uptake or  
32 risk of AMR.  
33  
34  
35  
36  
37  
38  
39

40 Six reviews reported on inequalities relating to religion and meningococcal disease, as well as  
41 vaccination.<sup>8 25 59 61 63 90</sup> A recent meta-analysis of two studies showed that religious events  
42 attendance was significantly associated with a decreased risk of invasive meningococcal disease (OR  
43 0.47 (95% CI, 0.28–0.79, p 0.0004).<sup>90</sup> Meta-analyses showed no strong evidence between various  
44 vaccination and religion including frequency of attendance at a place of worship.<sup>25 61</sup> Jewish  
45 Orthodox people in the UK and Belgium and Orthodox Protestants in the Netherlands were described  
46 as being under-vaccinated.<sup>8</sup> We did not identify any studies on the association of religion with the  
47 risk of any of the key infectious diseases or AMR.  
48  
49  
50  
51  
52  
53  
54

55  
56 Two reviews examined the association between gender reassignment and the risk of infectious  
57 diseases (HIV and HBV).<sup>53 56</sup> The prevalence of HIV was significantly higher among transgender  
58 female sex workers compared with biologically female sex workers (RR = 4.02, 95% CI 1.60 -  
59  
60

1  
2  
3 10.11).<sup>53</sup> However, in another review, transgender persons had lower prevalence of HBV compared  
4 to other groups such as sex workers, injection drug users, MSM and pregnant women.<sup>56</sup> We did not  
5 identify any reviews examining the association of gender reassignment with other infectious diseases  
6 of interest, vaccination or AMR.  
7  
8  
9

10  
11 We did not identify any review that reported the association of disability with our key infectious  
12 diseases topics. However, we identified one review which reported that disability was associated  
13 with a higher incidence of listeriosis.<sup>111</sup>  
14  
15  
16

### 17 18 **Evidence Relating to Socioeconomic Inequalities**

19  
20  
21 Fifty reviews explored socioeconomic status. The evidence consistently shows that those with lower  
22 level of income, lower educational attainment, unemployment, higher area level deprivation, lower  
23 socioeconomic status, or poor living situations are at higher risk of infectious diseases, AMR and  
24 lower vaccine uptake. For example, many reviews highlighted that low income, poverty and  
25 unemployment were associated with various infectious diseases including, HIV, STIs, TB, HBV and  
26 HCV among others.<sup>26 27 35 39 64 75 82 84 85 90 94 111-114</sup>  
27  
28  
29  
30  
31

32  
33 Level of education, income or occupation are often associated with vaccination uptake.<sup>19 25 30 36 55 60</sup>  
34  
35 61 63 65 67 69 100 115-119 Reviews have also reported an association of MDR-TB and AMR with lower  
36 level of income or education.<sup>47 120 121</sup> Many reviews examined the association of infectious disease  
37 topics of interest with areal level socioeconomic status,<sup>25 30 36 59 60 63 65 69 100 116 119 122</sup> deprivation,<sup>61 65</sup>  
38  
39 66 75 78 111 119 123 or living situation.<sup>30 36 44 47 49 51 60 65 67 69 84 85 87 90 94 96 101 105 113 121</sup> One meta-analysis  
40 showed significant association between neighbourhood deprivation and chlamydia infection (pooled  
41 OR 1.76, 95 % CI: 1.14–1.49).<sup>78</sup> In another meta-analysis, TB was associated with residing in an  
42 urban area (OR 1.52, 95%CI 1.35–1.72).<sup>49</sup> Those living in overcrowded or poor housing conditions  
43 had higher risk of TB.<sup>44</sup> AIDS mortality is significantly associated with lower socioeconomic  
44 status.<sup>122</sup> Group A Streptococcal infection, gastrointestinal infections and meningococcal disease  
45 were associated with poor living conditions.<sup>75 84 85 90 111 113</sup>  
46  
47  
48  
49  
50  
51  
52  
53  
54  
55

56 Two included reviews explored association between AMR and areal level deprivation.<sup>47 121</sup> Although  
57 the evidence is scant, the findings suggests that those living in deprived areas or poor living  
58 conditions may be at higher risk of AMR.  
59  
60

## DISCUSSION

This overview of reviews provides a broad synopsis of three dimensions of inequalities (inclusion health groups, protected characteristics, and socio-economic inequalities) across several infectious disease topics. We synthesised the existing evidence based on the dimension of inequalities. Of the three dimensions of inequalities assessed, the evidence relating to people in the inclusion health groups is the most consistent although the volume of evidence identified for each group varied. Most of the reviews identified under this dimension were on migration status, with higher prevalence of infectious diseases, AMR and lower vaccine uptake among migrants compared to non-migrants. Vulnerable migrants (such as refugees, asylum-seekers, and trafficked persons) are at higher risk when compared to general migrants and the size of inequalities varied depending on the country of origin. Although few reviews were identified for the remaining inclusion health groups, the evidence suggests that homelessness is associated with risk of infectious diseases and AMR; Gypsy Roma/ Traveller communities are often under vaccinated and are also at greater risk of infectious diseases; and people who engage in sex work are at greater risk of some infectious diseases.

There is a plethora of evidence from reviews showing higher prevalence of infectious diseases and under-vaccination among minority ethnic groups. We also identified several reviews suggesting higher prevalence of infectious diseases and AMR among MSM. These suggest that ethnicity and sexual orientation are important protected characteristics and targeting or tailoring interventions for such groups may be beneficial to reduce inequalities in infectious diseases.

Many reviews examined the association with age and sex, however, the identified associations varied depending on the specific infectious disease or type of vaccination. In addition, for most of the reviews, the comparator age groups were often unclear. Therefore, we are not able to identify specific age groups with higher risk across various infectious disease topics. Other factors besides equity issues may contribute significantly to associations with age. Also, vaccinations are often offered at specific ages so it is expected that uptake would be higher among those groups that are targeted. However, it is important to highlight that we found evidence suggesting that childhood vaccination compliance is lower for those with younger mothers/parents<sup>36 59 63</sup>. Based on this review, age and sex may be important for some infectious diseases but the group at higher risk may vary across diseases.



1  
2  
3 Reviews exploring marital status focused on vaccination and generally reported higher vaccination  
4 uptake among those who are married. It is not possible to draw a conclusion regarding the  
5 association of religion, disability, transgenderism, and pregnancy with infectious diseases based on  
6 the findings of this review as the synthesised evidence is scant and often inconsistent. More evidence  
7 is therefore needed to be able to establish the presence and direction of any associations of these  
8 factors with infectious diseases.  
9  
10  
11  
12  
13  
14

15 Several reviews provide compelling evidence of higher risk of infectious diseases, AMR, and lower  
16 vaccination uptake among those with lower level of income, lower educational attainment,  
17 unemployment, higher area level deprivation, lower socioeconomic status, and poor living situations.  
18 Although most of the evidence in this dimension is on vaccination, those of lower socioeconomic  
19 groups are often at higher risk from infectious diseases and should be targeted for intervention.  
20  
21  
22  
23  
24

### 25 **Strengths and limitations**

26  
27  
28  
29 The protocol used to guide the conduct of this review was designed a priori. We conducted a  
30 comprehensive literature search of four electronic databases with no language limits and searched for  
31 grey literature. Data extraction was checked by a second reviewer to improve accuracy and quality  
32 assessments were performed by two reviewers independently. Due to the timeframe required for the  
33 work, we could not complete all the initial titles and abstract screening in duplicate, however, full  
34 texts of potentially relevant reviews were independently screened by two reviewers. Despite our best  
35 efforts, we acknowledge that some relevant reviews may have been missed. The lack of synthesised  
36 evidence observed in some areas does not necessarily mean a lack of evidence. There may be  
37 primary studies in those areas which have not been synthesised in reviews and meta-analyses. Some  
38 underserved populations (such as people who inject drugs and prisoners) are not covered in this  
39 overview as these are beyond the scope of the work. Notwithstanding, we believe this provides a  
40 useful summary of available evidence relating to inequalities in infectious diseases relevant to high-  
41 income countries and highlights areas where evidence may be lacking or minimal.  
42  
43  
44  
45  
46  
47  
48  
49  
50  
51

52  
53 The quality of the included reviews varied significantly as some were not necessarily systematic  
54 reviews for which AMSTAR2 is designed. Heterogeneity between studies was a limitation reported  
55 in many of the included reviews and so pooled estimates should be interpreted with caution.  
56  
57  
58  
59  
60

## Conclusion

Overall, we provide strong evidence of groups consistently at higher risk of infectious diseases, AMR and under-vaccination. Developing targeted interventions for high-risk groups rather than focusing on individual infections could contribute significantly to reducing infectious disease burden. This reviews also highlights important evidence gaps that should be considered when commissioning future evidence syntheses or primary studies.

## Figure Legends

Figure 1: PRISMA flow diagram for study selection.

Figure 2: Matrix showing the number of reviews identified for each dimension of inequality and infectious disease topic. Colour ranges from red which indicates where no review was identified, up to green for a maximum number of reviews (15).

Figure 3: AMSTAR2 results for included reviews

## Acknowledgements

We would like to acknowledge colleagues from the University of Warwick, Samantha Johnson who supported us in developing the search strategy and Dr Yen-Fu Chen who helped with language translation. We are also grateful to those who responded to our request for information.

We also like to thank Dr Ines Campos-Matos from the UK Health Security Agency (UKHSA) and Office of Health Improvement and Disparities, Katy Sinka from the UKHSA, and Dr Rebecca Wilkinson from Hampshire Hospitals Foundation Trust for their support and guidance through the project. Abimbola Ayorinde and Iman Ghosh are funded by the National Institute for Health and Social Care Research (NIHR) Applied Research Collaboration (ARC) West Midlands, grant number NIHR200165. The views expressed are those of the author(s) and not necessarily those of the NIHR, the Department of Health and Social Care or Public Health England.

**Contributors:** AAA, IG, BB, NM and OO contributed to the protocol development. AAA, IG, IA, IZ, MS, EM, SSA, and SR contributed to the selection of studies, data extraction and quality assessment. AAA conducted data synthesis and drafted the manuscript. All authors reviewed and approved the final manuscript.

**Funding:** This work was supported by Public Health England

1  
2  
3 **Competing interest:** None declared

4  
5 **Patient and public involvement:** Patients and/or the public were not involved in  
6 the design, or conduct, or reporting, or dissemination plans of this research.

7  
8 **Patient consent for publication:** Not required

9  
10  
11 **Ethical Approval Statement:** This study does not involve human participants. This is a systematic  
12 overview of review of existing literature. Ethics approval is not applicable.

13  
14  
15 **Data Sharing Statement:** All data relevant to the study are included in the article or uploaded as  
16 online supplemental information.

## 17 18 19 20 21 22 23 24 **REFERENCES**

- 25 1. WHO WHO. Human rights and health 2017 [Available from: <https://www.who.int/news-room/fact-sheets/detail/human-rights-and-health> accessed 16th April 2021.
- 26 2. Marmot M. Inequalities in health. *New England Journal of Medicine* 2001;345(2):134-35.
- 27 3. Marmot M, Wilkinson R. Social determinants of health. Oxford 2005.
- 28 4. Graham H. Social determinants and their unequal distribution: clarifying policy understandings. *Milbank Q* 2004;82(1):101-24. doi: 10.1111/j.0887-378x.2004.00303.x
- 29 5. Quinn SC, Kumar S. Health inequalities and infectious disease epidemics: a challenge for global  
30 health security. *Biosecurity and bioterrorism: biodefense strategy, practice, and science*  
31 2014;12(5):263-73. doi: <https://doi.org/10.1089/bsp.2014.0032>
- 32 6. House of Parliament. UK Trends in Infectious Disease. In: technology. Poosa, ed. 545 ed, 2017.
- 33 7. CDC CfDCaP. *Vaccines and Preventable Diseases* 2016 [Available from:  
34 <https://www.cdc.gov/vaccines/vpd/index.html> accessed 16th April 2021.
- 35 8. Fournet N, Mollema L, Ruijs WL, et al. Under-vaccinated groups in Europe and their beliefs,  
36 attitudes and reasons for non-vaccination; two systematic reviews. *BMC Public Health*  
37 2018;18(1):196.
- 38 9. Rotheram S, Cooper J, Barr B, et al. How are inequalities generated in the management and  
39 consequences of gastrointestinal infections in the UK? An ethnographic study. *Social Science  
40 & Medicine* 2021;282:114131. doi: <https://doi.org/10.1016/j.socscimed.2021.114131>
- 41 10. Hughes GJ, Gorton R. Inequalities in the incidence of infectious disease in the North East of  
42 England: a population-based study. (1469-4409 (Electronic))
- 43 11. PHE PHE. Health protection report, Weekly report. Infection Report, 2016.
- 44 12. Baker EH. Socioeconomic Status, Definition. *The Wiley Blackwell Encyclopedia of Health,  
45 Illness, Behavior, and Society* 2014:2210-14. doi:  
46 <https://doi.org/10.1002/9781118410868.wbehibs395>
- 47 13. PHE PHE. Tackling tuberculosis in under-served populations. Public Health Matters, 2019.
- 48 14. Chernet A, Utzinger J, Sydow V, et al. Prevalence rates of six selected infectious diseases among  
49 African migrants and refugees: a systematic review and meta-analysis. *European Journal of  
50 Clinical Microbiology & Infectious Diseases* 2018;37(4):605-19.

15. Semenza JC, Giesecke J. Intervening to reduce inequalities in infections in Europe. *Am J Public Health* 2008;98(5):787-92. doi: 10.2105/AJPH.2007.120329 [published Online First: 2008/04/01]
16. Shea BJ, Reeves BC, Wells G, et al. AMSTAR 2: a critical appraisal tool for systematic reviews that include randomised or non-randomised studies of healthcare interventions, or both. *BMJ* 2017;358:j4008. doi: 10.1136/bmj.j4008
17. Stevens A. Putting high-risk under-served populations at the centre of joint efforts to eliminate Hepatitis B and C, Tuberculosis and HIV and halt the rise in sexually transmitted infections PHE Infectious Diseases Strategy 2020-2025, 2020.
18. Chan IHY, Kaushik N, Dobler CC. Post-migration follow-up of migrants identified to be at increased risk of developing tuberculosis at pre-migration screening: a systematic review and meta-analysis. *The Lancet Infectious Diseases* 2017;17(7):770-79.
19. De Vito E, Parente P, de Waure C, et al. A review of evidence on equitable delivery, access and utilization of immunization services for migrants and refugees in the WHO European Region. *WHO Regional Office for Europe WHO Health Evidence Network Synthesis Reports* 2017
20. Falla AM, Ahmad AA, Duffell E, et al. Estimating the scale of chronic hepatitis C virus infection in the EU/EEA: a focus on migrants from anti-HCV endemic countries. 2018(1471-2334 (Electronic))
21. Faustini A, Hall AJ, Perucci CA. Risk factors for multidrug resistant tuberculosis in Europe: a systematic review. *Thorax* 2006;61(2):158-63.
22. Greenaway C, Thu Ma A, Kloda LA, et al. The Seroprevalence of Hepatitis C Antibodies in Immigrants and Refugees from Intermediate and High Endemic Countries: A Systematic Review and Meta-Analysis. *PLoS ONE [Electronic Resource]* 2015;10(11):e0141715.
23. gren A, Schepisi MS, Sotgiu G, et al. Tuberculosis transmission between foreign- and native-born populations in the EU/EEA: a systematic review. *European Respiratory Journal* 2014;43(4):1159-71.
24. Hahne SJM, Veldhuijzen IK, Wiessing L, et al. Infection with hepatitis B and C virus in Europe: a systematic review of prevalence and cost-effectiveness of screening. *Bmc Infectious Diseases* 2013;13:16.
25. Jain A, van Hoek AJ, Boccia D, et al. Lower vaccine uptake amongst older individuals living alone: A systematic review and meta-analysis of social determinants of vaccine uptake. *Vaccine* 2017;35(18):2315-28.
26. Kawatsu L Fau - Ishikawa N, Ishikawa N. [Socio-economic factors that influence tuberculosis death among the youth and middle-aged population: a systematic review]. 2014(0022-9776 (Print))
27. Kentikelenis A, Karanikolos M, Williams G, et al. How do economic crises affect migrants' risk of infectious disease? A systematic-narrative review. *European Journal of Public Health* 2015;25(6):937-44.
28. Mipatrini D, Stefanelli P, Severoni S, et al. Vaccinations in migrants and refugees: a challenge for European health systems. A systematic review of current scientific evidence. *Pathogens and Global Health* 2017;111(2):59-68.
29. Morais S, Costa AR, Ferro A, et al. Contemporary migration patterns in the prevalence of *Helicobacter pylori* infection: A systematic review. *Helicobacter* 2017;22(3)
30. Okoli GN, Lam OLT, Racovitan F, et al. Seasonal influenza vaccination in older people: A systematic review and meta-analysis of the determining factors. *Plos One* 2020;15(6):26.
31. Platt L, Grenfell P, Fletcher A, et al. Systematic review examining differences in HIV, sexually transmitted infections and health-related harms between migrant and non-migrant female sex workers. *Sexually Transmitted Infections* 2013;89(4):311-9.

32. Platt L, Jolley E, Rhodes T, et al. Factors mediating HIV risk among female sex workers in Europe: a systematic review and ecological analysis. *BMJ Open* 2013;3(7)
33. Prost A, Elford J, Imrie J, et al. Social, behavioural, and intervention research among people of Sub-Saharan African origin living with HIV in the UK and Europe: literature review and recommendations for intervention. *AIDS & Behavior* 2008;12(2):170-94.
34. Rossi C, Shrier I, Marshall L, et al. Seroprevalence of chronic hepatitis B virus infection and prior immunity in immigrants and refugees: a systematic review and meta-analysis. *PLoS ONE [Electronic Resource]* 2012;7(9):e44611.
35. Suhrcke M, Stuckler D, Suk JE, et al. The impact of economic crises on communicable disease transmission and control: a systematic review of the evidence. *PLoS ONE [Electronic Resource]* 2011;6(6):e20724.
36. Taul Mde C, Sato AP, Waldman EA. Factors associated with incomplete or delayed vaccination across countries: A systematic review. 2016(1873-2518 (Electronic))
37. Tavares AM, Fronteira I, Couto I, et al. HIV and tuberculosis co-infection among migrants in Europe: A systematic review on the prevalence, incidence and mortality. *PLoS ONE [Electronic Resource]* 2017;12(9):e0185526.
38. Jackson S, Kabir Z, Comiskey C. Effects of migration on tuberculosis epidemiological indicators in low and medium tuberculosis incidence countries: A systematic review. *Journal of Clinical Tuberculosis and Other Mycobacterial Diseases* 2021;23(6):100225. doi: <https://doi.org/10.1016/j.jctube.2021.100225>
39. Kabapy AF, Shatat HZ, Abd El-Wahab EA-O. Attributes of HIV infection over decades (1982-2018): A systematic review and meta-analysis. *Transbound Emerg Dis* 2020;67(6):2372-88. doi: 10.1111/tbed.13621
40. McBride B, Shannon K, Strathdee SA, et al. Structural determinants of HIV/STI prevalence, HIV/STI/sexual and reproductive health access, and condom use among immigrant sex workers globally. *AIDS* 2021;35(9):1461-77. doi: 10.1097/QAD.0000000000002910
41. Pega FA-O, Govindaraj S, Tran NT. Health service use and health outcomes among international migrant workers compared with non-migrant workers: A systematic review and meta-analysis. *PloS one*, 2021;16(6):e0252651. doi: <https://doi.org/10.1371/journal.pone.0252651>
42. Nellums LB, Thompson H, Holmes A, et al. Antimicrobial resistance among migrants in Europe: a systematic review and meta-analysis. *The Lancet Infectious Diseases* 2018;18(7):796-811.
43. Yu YJ, Bruna S, McCarty C. HIV Risk among trafficked women: a systematic review of the global literature. *Aids Care-Psychological and Socio-Medical Aspects of Aids/Hiv* 2020:11.
44. Cormier M, Schwartzman K, N'Diaye DS, et al. Proximate determinants of tuberculosis in Indigenous peoples worldwide: a systematic review. *The Lancet Global Health* 2019;7(1):e68-e80.
45. Tollefson D, Bloss E, Fanning A, et al. Burden of tuberculosis in indigenous peoples globally: A systematic review. *International Journal of Tuberculosis and Lung Disease* 2013;17(9):1139-50.
46. Aldridge RW, Story A, Hwang SW, et al. Morbidity and mortality in homeless individuals, prisoners, sex workers, and individuals with substance use disorders in high-income countries: a systematic review and meta-analysis. *Lancet* 2018;391(10117):241-50.
47. Alividza V, Mariano V, Ahmad R, et al. Investigating the impact of poverty on colonization and infection with drug-resistant organisms in humans: a systematic review. *Infectious Diseases of Poverty* 2018;7(1):76.
48. Beijer U, Wolf A, Fazel S. Prevalence of tuberculosis, hepatitis C virus, and HIV in homeless people: a systematic review and meta-analysis. *The Lancet Infectious Diseases* 2012;12(11):859-70. doi: [https://doi.org/10.1016/S1473-3099\(12\)70177-9](https://doi.org/10.1016/S1473-3099(12)70177-9)

- 1
- 2
- 3
- 4 49. Nava-Aguilera E, Andersson N, Harris E, et al. Risk factors associated with recent transmission
- 5 of tuberculosis: systematic review and meta-analysis. *International Journal of Tuberculosis*
- 6 *and Lung Disease* 2009;13(1):17-26.
- 7 50. Arum C, Fraser H, Artenie AA, et al. Homelessness, unstable housing, and risk of HIV and
- 8 hepatitis C virus acquisition among people who inject drugs: a systematic review and meta-
- 9 analysis. *The Lancet Public Health* 2021;6(5):e309–e23. doi: [https://doi.org/10.1016/S2468-](https://doi.org/10.1016/S2468-2667(21)00013-X)
- 10 [2667\(21\)00013-X](https://doi.org/10.1016/S2468-2667(21)00013-X)
- 11 51. Ly TDA, Castaneda S, Hoang VT, et al. Vaccine-preventable diseases other than tuberculosis,
- 12 and homelessness: A systematic review of the published literature, 1980 to 2020. *medRxiv*
- 13 2020:2020.10.28.20220335. doi: 10.1101/2020.10.28.20220335
- 14 52. Oldenburg CE, Perez-Brumer AG, Reisner SL, et al. Transactional Sex and the HIV Epidemic
- 15 Among Men Who have Sex with Men (MSM): Results From a Systematic Review and Meta-
- 16 analysis. *AIDS & Behavior* 2015;19(12):2177-83.
- 17 53. Operario D, Soma T, Underhill K. Sex work and HIV status among transgender women:
- 18 systematic review and meta-analysis. *Journal of Acquired Immune Deficiency Syndromes:*
- 19 *JAIDS* 2008;48(1):97-103.
- 20 54. Stockdale AJ, Kreuels B, Henrion MYR, et al. The global prevalence of hepatitis D virus
- 21 infection: Systematic review and meta-analysis. *Journal of Hepatology* 2020;73(3):523-32.
- 22 55. Vet R, de Wit JB, Das E. Factors associated with hepatitis B vaccination among men who have
- 23 sex with men: a systematic review of published research. *International Journal of STD &*
- 24 *AIDS* 2017;28(6):534-42.
- 25 56. Leumi S, Bigna JJ, Amougou MA, et al. Global Burden of Hepatitis B Infection in People Living
- 26 With Human Immunodeficiency Virus: A Systematic Review and Meta-analysis. *Clin Infect*
- 27 *Dis* 2020;71(11):2799-806. doi: doi:10.1093/cid/ciz1170
- 28 57. Wu J, Ding C, Liu X, et al. Worldwide burden of genital human papillomavirus infection in
- 29 female sex workers: a systematic review and meta-analysis. *International journal of*
- 30 *epidemiology* 2021;50(2):527-37. doi: doi:10.1093/ije/dyaa289
- 31 58. Abraha M, Egli-Gany D, Low N. Epidemiological, behavioural, and clinical factors associated
- 32 with antimicrobial-resistant gonorrhoea: a review. *F1000Research* 2018;7:400.
- 33 59. Falagas ME, Zarkadoulia E. Factors associated with suboptimal compliance to vaccinations in
- 34 children in developed countries: a systematic review. 2008(1473-4877 (Electronic))
- 35 60. Fern, ez de Casadevante V, Gil Cuesta J, et al. Determinants in the Uptake of the Human
- 36 Papillomavirus Vaccine: A Systematic Review Based on European Studies. *Frontiers in*
- 37 *Oncology* 2015;5:141.
- 38 61. Fisher H, Trotter CL, Audrey S, et al. Inequalities in the uptake of human papillomavirus
- 39 vaccination: a systematic review and meta-analysis. *International Journal of Epidemiology*
- 40 2013;42(3):896-908.
- 41 62. Gorjana R, Chapman J, Flight I, et al. Factors associated with parents' attitudes to the HPV
- 42 vaccination of their adolescent sons : A systematic review. *Preventive Medicine*
- 43 2017;95(1):26-37.
- 44 63. Malerba V, Costantino C, Napoli G, et al. Antimeningococcal and antipneumococcal vaccination
- 45 determinants: a European systematic literature review. 2015(1120-9763 (Print))
- 46 64. Millett GA, Peterson JI Fau - Flores SA, Flores Sa Fau - Hart TA, et al. Comparisons of
- 47 disparities and risks of HIV infection in black and other men who have sex with men in
- 48 Canada, UK, and USA: a meta-analysis. 2012(1474-547X (Electronic))
- 49 65. Nagata JM, Hern, ez-Ramos I, et al. Social determinants of health and seasonal influenza
- 50 vaccination in adults  $\geq 65$  years: a systematic review of qualitative and quantitative data.
- 51 *BMC Public Health* 2013;13:388.
- 52 66. Offer C, Lee A, Humphreys C. Tuberculosis in South Asian communities in the UK: a systematic
- 53 review of the literature. *Journal of Public Health* 2015;38(2):250-7.
- 54
- 55
- 56
- 57
- 58
- 59
- 60

- 1  
2  
3 67. Tabacchi G, Costantino C, Napoli G, et al. Determinants of European parents' decision on the  
4 vaccination of their children against measles, mumps and rubella: A systematic review and  
5 meta-analysis. *Human vaccines & Immunotherapeutics* 2016;12(7):1909-23.
- 6 68. Wayal S, Aicken CRH, Griffiths C, et al. Understanding the burden of bacterial sexually  
7 transmitted infections and *Trichomonas vaginalis* among black Caribbeans in the United  
8 Kingdom: Findings from a systematic review. *Plos One* 2018;13(12):19.
- 9 69. Okoli GA-OX, Reddy VK, Al-Yousif Y, et al. Sociodemographic and health-related determinants  
10 of seasonal influenza vaccination in pregnancy: A systematic review and meta-analysis of the  
11 evidence since 2000. *Acta obstetrica et gynecologica Scandinavica*, 2021;100(6):997-1009.  
12 doi: doi:10.1111/aogs.14079
- 13 70. Chen Q, Zeng D, She Y, et al. Different transmission routes and the risk of advanced HIV  
14 disease: A systematic review and network meta-analysis of observational studies.  
15 *EClinicalMedicine* 2019;16:121-28. doi: 10.1016/j.eclinm.2019.10.003
- 16 71. Fakoya I, Alvarez-del Arco D, Woode-Owusu M, et al. A systematic review of post-migration  
17 acquisition of HIV among migrants from countries with generalised HIV epidemics living in  
18 Europe: mplications for effectively managing HIV prevention programmes and policy. *BMC*  
19 *Public Health* 2015;15:561.
- 20 72. Jin FY, Dore GJ, Matthews G, et al. Prevalence and incidence of hepatitis C virus infection in  
21 men who have sex with men: a systematic review and meta-analysis. *Lancet*  
22 *Gastroenterology & Hepatology* 2020;6(1):39-56.
- 23 73. Oldenburg CE, Perez-Brumer AG, Reisner SL, et al. Global burden of HIV among men who  
24 engage in transactional sex: a systematic review and meta-analysis. *PLoS ONE [Electronic*  
25 *Resource]* 2014;9(7):e103549.
- 26 74. Colledge S, Leung J, Grebely J, et al. Socio-demographic and ecological factors associated with  
27 anti-HCV prevalence in people who inject drugs: A systematic review. *Drug & Alcohol*  
28 *Dependence* 2020;209:107899.
- 29 75. Adams NL, Rose TC, Hawker J, et al. Relationship between socioeconomic status and  
30 gastrointestinal infections in developed countries: A systematic review and meta-analysis.  
31 *PLoS ONE [Electronic Resource]* 2018;13(1):e0191633.
- 32 76. Behera MR, Intarak R. HIV risk among labor migrants: An in-depth study of the literature.  
33 *Indian Journal of Public Health Research and Development* 2020;9(12):107-15.
- 34 77. Bonten M, Johnson JR, van den Biggelaar AHJ, et al. Epidemiology of *Escherichia coli*  
35 Bacteremia: A Systematic Literature Review. 2021(1537-6591 (Electronic))
- 36 78. Crichton J, Hickman M, Campbell R, et al. Socioeconomic factors and other sources of variation  
37 in the prevalence of genital chlamydia infections: A systematic review and meta-analysis.  
38 *BMC Public Health* 2015;15:729.
- 39 79. Denning DW, Kneale M, Sobel JD, et al. Global burden of recurrent vulvovaginal candidiasis: a  
40 systematic review. *The Lancet Infectious Diseases* 2018;18(11):e339-e47. doi:  
41 10.1016/S1473-3099(18)30103-8
- 42 80. Ghiasv, H, Higgs P, et al. Social and demographical determinants of quality of life in people  
43 who live with HIV/AIDS infection: evidence from a meta-analysis. *Biodemography & Social*  
44 *Biology* 2019;65(1):57-72.
- 45 81. Hermann JS, Featherstone RM, Russell ML, et al. Immunization Coverage of Children in Care of  
46 the Child Welfare System in High-Income Countries: A Systematic Review. *American*  
47 *Journal of Preventive Medicine* 2019;56(2):e55-e63. doi:  
48 <https://doi.org/10.1016/j.amepre.2018.07.026>
- 49 82. Li P, Liu J, Li Y, et al. The global epidemiology of hepatitis E virus infection: A systematic  
50 review and meta-analysis. *Liver International* 2020;40(7):1516-28.
- 51  
52  
53  
54  
55  
56  
57  
58  
59  
60

- 1  
2  
3  
4  
5  
6  
7  
8  
9  
10  
11  
12  
13  
14  
15  
16  
17  
18  
19  
20  
21  
22  
23  
24  
25  
26  
27  
28  
29  
30  
31  
32  
33  
34  
35  
36  
37  
38  
39  
40  
41  
42  
43  
44  
45  
46  
47  
48  
49  
50  
51  
52  
53  
54  
55  
56  
57  
58  
59  
60
83. Lindsay L, Wolter J, De Coster I, et al. A decade of norovirus disease risk among older adults in upper-middle and high income countries: a systematic review. *BMC Infectious Diseases* 2015;15:425.
  84. Possenti A, Manzano-Román R, Sánchez-Ovejero C, et al. Potential Risk Factors Associated with Human Cystic Echinococcosis: Systematic Review and Meta-analysis. 2016(1935-2735 (Electronic))
  85. Richterman A, Sainvilien DR, Eberly L, et al. Individual and Household Risk Factors for Symptomatic Cholera Infection: A Systematic Review and Meta-analysis. 2018(1537-6613 (Electronic))
  86. Rostami A, Riahi SM, Contopoulos-Ioannidis DG, et al. Acute Toxoplasma infection in pregnant women worldwide: A systematic review and meta-analysis. *Plos Neglected Tropical Diseases* 2019;13(10):20.
  87. Rostami A, Riahi SM, Holl, et al. Seroprevalence estimates for toxocariasis in people worldwide: A systematic review and meta-analysis. *PLoS Neglected Tropical Diseases [electronic resource]* 2019;13(12):e0007809.
  88. Schepisi MS, Motta I, Dore S, et al. Tuberculosis transmission among children and adolescents in schools and other congregate settings: a systematic review. *New Microbiologica* 2019;41(4):282-90.
  89. Schierhout G, McGregor S, Gessain A, et al. Association between HTLV-1 infection and adverse health outcomes: a systematic review and meta-analysis of epidemiological studies. *Lancet Infectious Diseases* 2020;20(1):133-43.
  90. Spyromitrou-Xioufi P, Tsirigotaki M, Ladomenou F. Risk factors for meningococcal disease in children and adolescents: a systematic review and META-analysis. *European Journal of Pediatrics* 2020;179(7):1017-27.
  91. Strifler L, Morris SK, Dang V, et al. The health burden of invasive meningococcal disease: A systematic review. *Paediatrics and Child Health (Canada)* 2016;19:e92.
  92. Zamani M, Ebrahimitabar F, Zamani V, et al. Systematic review with meta-analysis: the worldwide prevalence of Helicobacter pylori infection. *Alimentary Pharmacology and Therapeutics* 2018;47(7):868-76.
  93. Badri MA-OX, Eslahi AV, Olfatifar M, et al. Keys to Unlock the Enigma of Ocular Toxocariasis: A Systematic Review and Meta-analysis. *Ocular immunology and inflammation*, 2021;Advance online publication.:1-12. doi: <https://doi.org/10.1080/09273948.2021.1875007>
  94. Dong S, Yang Y, Wang Y, et al. Prevalence of Cryptosporidium Infection in the Global Population: A Systematic Review and Meta-analysis. *Acta Parasitol* 2020;65(4):882-89. doi: doi:10.2478/s11686-020-00230-1
  95. Dugan E, Blach S, Biondi M, et al. Global prevalence of hepatitis C virus in women of childbearing age in 2019: a modelling study. *The Lancet Gastroenterology & Hepatology* 2021;6(3):169-84. doi: 10.1016/S2468-1253(20)30359-9
  96. Faria APV, da Silva TPR, Duarte CK, et al. Tetanus vaccination in pregnant women: a systematic review and meta-analysis of the global literature. *Public health*, 2021;196:43-51. doi: <https://doi.org/10.1016/j.puhe.2021.04.019>
  97. Lafond KA-O, Porter RA-O, Whaley MA-O, et al. Global burden of influenza-associated lower respiratory tract infections and hospitalizations among adults: A systematic review and meta-analysis. *PLoS Med* 2021;18(3):e1003550. doi: <https://doi.org/10.1371/journal.pmed.1003550>
  98. Macina D, Evans KE. Bordetella pertussis in School-Age Children, Adolescents and Adults: A Systematic Review of Epidemiology and Mortality in Europe. *Infect Dis Ther* 2021;10(4):2021-118. doi: doi:10.1007/s40121-021-00520-9



- 1  
2  
3 99. Mirzadeh M, Olfatifar M, Eslahi AV, et al. Global prevalence of *Trichomonas vaginalis* among  
4 female sex workers: a systematic review and meta-analysis. *Parasitol Res* 2021;120(7):2311-  
5 22. doi: 10.1007/s00436-021-07216-6
- 6  
7 100. Roller-Wirnsberger RA-O, Lindner S, Kolosovski L, et al. The role of health determinants in  
8 the influenza vaccination uptake among older adults (65+): a scope review. *Aging clinical  
9 and experimental research* 2021;33(8):2123-32. doi: doi:10.1007/s40520-021-01793-3
- 10  
11 101. Rostami AA-O, Riahi SA-O, Abdollahzadeh Sagha S, et al. Seroprevalence Estimates of Latent  
12 and Acute Toxoplasma Infections in HIV(+) People-Call for Action in Underprivileged  
13 Communities. LID - 10.3390/microorganisms9102034 [doi] LID - 2034. *Communities  
14 Microorganisms*, 2021;9(10):2034. doi: <https://doi.org/10.3390/microorganisms9102034>
- 15  
16 102. Song WM, Li YF, Liu YX, et al. Drug-Resistant Tuberculosis Among Children: A Systematic  
17 Review and Meta-Analysis. *Frontiers in public health*, 2021;9:721817. doi:  
18 <https://doi.org/10.3389/fpubh.2021.721817>
- 19  
20 103. Sultana ZZ, Hoque FU, Beyene J, et al. HIV infection and multidrug resistant tuberculosis: a  
21 systematic review and meta-analysis. *BMC Infectious Diseases* 2021;21(1):51. doi:  
22 10.1186/s12879-020-05749-2
- 23  
24 104. Eilami O, Nazari A, Dousti M, et al. Investigation of HIV/AIDS prevalence and associated risk  
25 factors among female sex workers from 2010 to 2017: a meta-analysis study. *HIV/AIDS  
26 Research and Palliative Care* 2019;11:105-17.
- 27  
28 105. Fauroux B, Simoes EAF, Checchia PA, et al. The Burden and Long-term Respiratory Morbidity  
29 Associated with Respiratory Syncytial Virus Infection in Early Childhood. *Infectious  
30 Diseases and Therapy* 2017;6(2):173-97.
- 31  
32 106. Leung J, Peacock A, Colledge S, et al. A Global Meta-analysis of the Prevalence of HIV,  
33 Hepatitis C Virus, and Hepatitis B Virus Among People Who Inject Drugs-Do Gender-Based  
34 Differences Vary by Country-Level Indicators? *Journal of Infectious Diseases*  
35 2019;220(1):78-90.
- 36  
37 107. Pulver A, Ramraj C, Ray JG, et al. A scoping review of female disadvantage in health care use  
38 among very young children of immigrant families. *Social Science & Medicine* 2016;152:50-  
39 60.
- 40  
41 108. Van Gerwen O, Muzny C, Austin E, et al. Prevalence of STIs and HIV in transgender women  
42 and men: A systematic review. *Sexually Transmitted Infections* 2020;95:A335.
- 43  
44 109. Whelan J, Abbing-Karahagopian V, Serino L, et al. Gonorrhoea: a systematic review of  
45 prevalence reporting globally. *BMC Infectious Diseases* 2021;21(1):1152. doi:  
46 10.1186/s12879-021-06381-4
- 47  
48 110. Nourollahpour Shiadeh M, Esfandyari S, Ashrafmansouri M, et al. The prevalence of latent and  
49 acute toxoplasmosis in HIV-infected pregnant women: A systematic review and meta-  
50 analysis. *Microb Pathog* 2020;149(1096-1208 (Electronic)):104549. . doi:  
51 doi:10.1016/j.micpath.2020.104549
- 52  
53 111. Newman KL, Leon JS, Rebolledo PA, et al. The impact of socioeconomic status on foodborne  
54 illness in high-income countries: a systematic review. *Epidemiology & Infection*  
55 2015;143(12):2473-85.
- 56  
57 112. Rodrigo C, Rajapakse S. HIV, poverty and women. *International Health* 2010;2(1):9-16.
- 58  
59 113. Coffey PM, Ralph AP, Krause VL. The role of social determinants of health in the risk and  
60 prevention of group A streptococcal infection, acute rheumatic fever and rheumatic heart  
disease: A systematic review. *Plos Neglected Tropical Diseases* 2018;12(6):22.
114. Ding Y, Sun X, Xu Y, et al. Association Between Income and Hepatitis B Seroprevalence: A  
Systematic Review and Meta-analysis. *Hepat Mon* 2020;20(10):e104675. doi:  
10.5812/hepatmon.104675 [published Online First: 2020-12-01]

- 1  
2  
3 115. Larson HJ, Jarrett C, Eckersberger E, et al. Understanding vaccine hesitancy around vaccines  
4 and vaccination from a global perspective: A systematic review of published literature, 2007-  
5 2012. *Vaccine* 2014;32(19):2150-59.  
6  
7 116. Arat A, Burstrom B, Ostberg V, et al. Social inequities in vaccination coverage among infants  
8 and pre-school children in Europe and Australia - a systematic review. *BMC Public Health*  
9 2019;19(1):290.  
10  
11 117. Forshaw J, Gerver SM, Gill M, et al. The global effect of maternal education on complete  
12 childhood vaccination: a systematic review and meta-analysis. *BMC Infectious Diseases*  
13 2017;17(1):801.  
14  
15 118. Bocquier A, Ward J, Raude J, et al. Socioeconomic differences in childhood vaccination in  
16 developed countries: a systematic review of quantitative studies. *Expert Review of Vaccines*  
17 2017;16(11):1107-18.  
18  
19 119. Lucyk K, Simmonds KA, Lorenzetti DL, et al. The association between influenza vaccination  
20 and socioeconomic status in high income countries varies by the measure used: a systematic  
21 review. *BMC Medical Research Methodology* 2019;19(1):153.  
22  
23 120. Di Gennaro F, Pizzol D, Cebola B, et al. Social determinants of therapy failure and multi drug  
24 resistance among people with tuberculosis: A review. 2017(1873-281X (Electronic))  
25  
26 121. Najafizada M, Rahman A, Taufique Q, et al. Social determinants of multidrug-resistant  
27 tuberculosis: A scoping review and research gaps. *Indian J Tuberc* 2021;68(1):99-105. doi:  
28 10.1016/j.ijtb.2020.09.016  
29  
30 122. Salgado-Barreira A, Estany-Gestal A, Figueiras A. [Effect of socioeconomic status on mortality  
31 in urban areas: a systematic critical review]. *Cadernos de Saude Publica* 2014;30(8):1609-21.  
32  
33 123. Vukovic V, Lillini R, Lupi S, et al. Identifying people at risk for influenza with low vaccine  
34 uptake based on deprivation status: a systematic review. *European Journal of Public Health*  
35 2020;30(1):132-41.  
36  
37  
38  
39  
40  
41  
42  
43  
44  
45  
46  
47  
48  
49  
50  
51  
52  
53  
54  
55  
56  
57  
58  
59  
60

Figure 1: PRISMA flow diagram for study selection

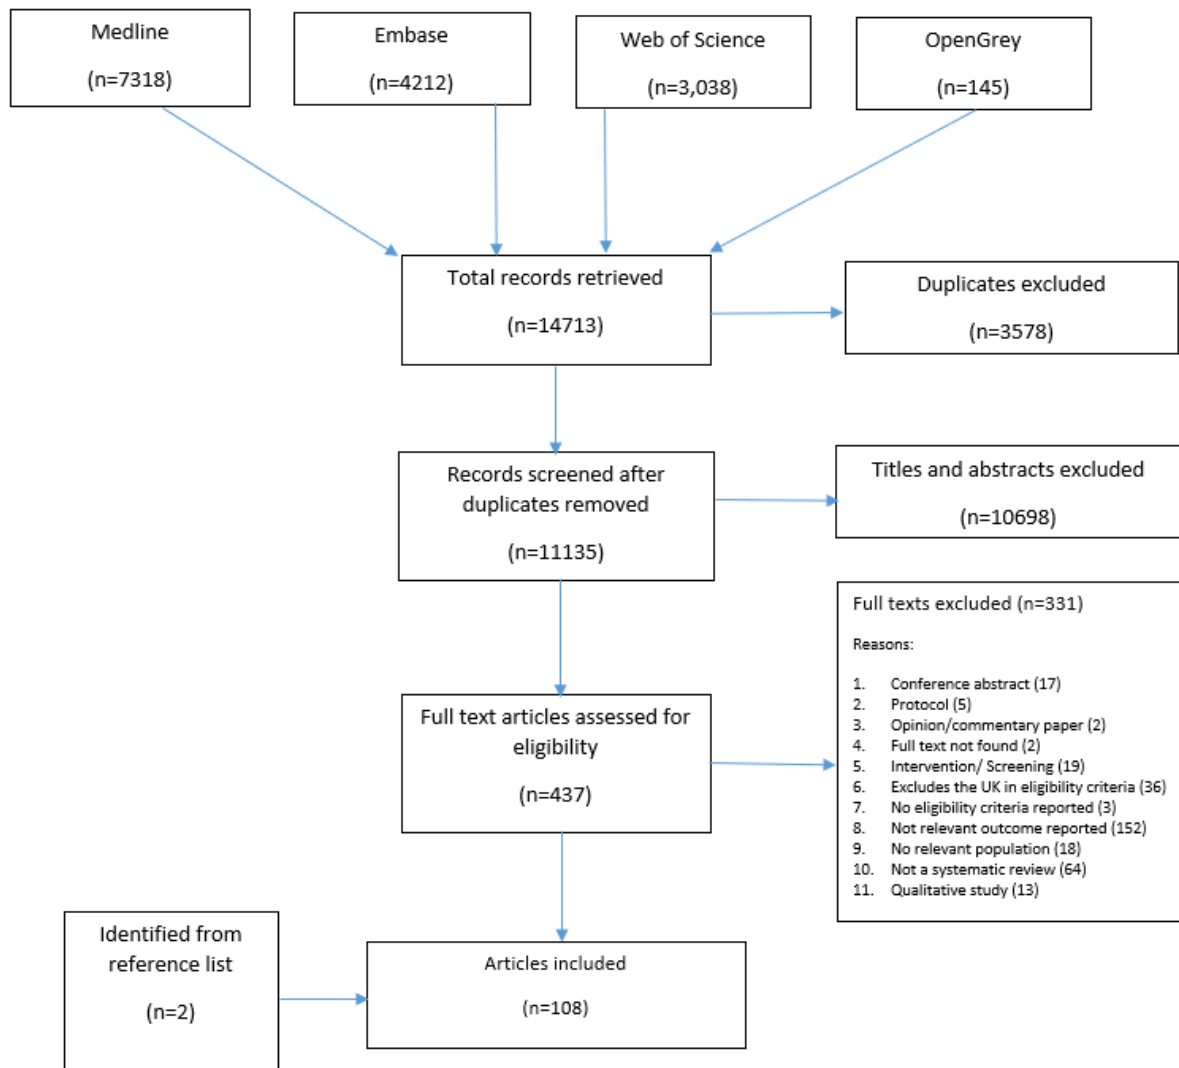

| Dimension of inequalities  | Variables                                                                                        | Tuberculosis | HIV | STI | Hepatitis C | Vaccination | AMR/multi-drug resistance | Others |
|----------------------------|--------------------------------------------------------------------------------------------------|--------------|-----|-----|-------------|-------------|---------------------------|--------|
| Protected characteristics  | Age                                                                                              | 2            | 3   | 4   | 3           | 13          | 4                         | 19     |
|                            | Sex                                                                                              | 2            | 7   | 4   | 3           | 5           | 2                         | 11     |
|                            | Marriage and civil partnership                                                                   | 0            | 0   | 0   | 0           | 6           | 0                         | 0      |
|                            | Pregnancy and maternity                                                                          | 0            | 0   | 0   | 2           | 0           | 0                         | 3      |
|                            | Race (or ethnicity)                                                                              | 3            | 2   | 1   | 0           | 11          | 1                         | 1      |
|                            | Religion or belief                                                                               | 0            | 0   | 0   | 0           | 5           | 0                         | 1      |
|                            | Sexual orientation                                                                               | 0            | 4   | 0   | 2           | 0           | 1                         | 4      |
|                            | Gender reassignment                                                                              | 0            | 1   | 0   | 0           | 0           | 0                         | 1      |
| Disability                 | 0                                                                                                | 0            | 0   | 0   | 0           | 0           | 1                         |        |
| Inclusion Health Groups    | Vulnerable migrants                                                                              | 0            | 1   | 1   | 2           | 2           | 1                         | 3      |
|                            | General migrants                                                                                 | 5            | 8   | 4   | 5           | 5           | 2                         | 6      |
|                            | People experiencing homelessness and rough sleeping                                              | 3            | 2   | 0   | 2           | 0           | 1                         | 3      |
|                            | People who engage in sex work                                                                    | 0            | 4   | 2   | 0           | 1           | 0                         | 2      |
|                            | Gypsy Roma/ Traveller communities/Indigenous people                                              | 2            | 0   | 0   | 0           | 1           | 0                         | 0      |
|                            |                                                                                                  |              |     |     |             |             |                           |        |
| Socioeconomic inequalities | Level of education/income                                                                        | 1            | 4   | 1   | 0           | 18          | 3                         | 9      |
|                            | Employment/occupation                                                                            | 1            | 2   | 2   | 1           | 10          | 0                         | 5      |
|                            | Social class/Area level socioeconomic status                                                     | 0            | 1   | 0   | 0           | 11          | 0                         | 1      |
|                            | Deprivation                                                                                      | 1            | 0   | 1   | 0           | 4           | 0                         | 2      |
|                            | Residence/living situation (e.g living in a home environment with moisture damage, house tenure) | 2            | 0   | 0   | 0           | 7           | 2                         | 10     |

Review only

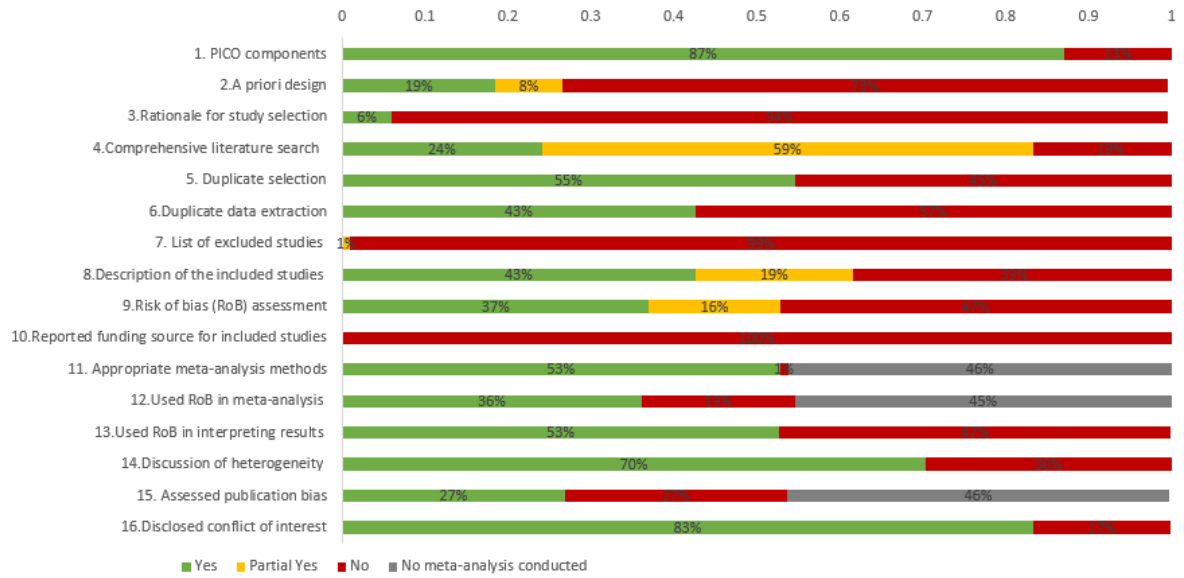

peer review only

## APPENDIX 1: SEARCH STRATEGY

Searched Ovid MEDLINE(R) ALL 1946 to November 23, 2021 on 24/11/2021

Search terms for systematic reviews found at

<http://extranet.santecom.gc.ca/wiki/!biblio3s/doku.php?id=concepts:revues-de-la-litterature-et-meta-analyses>

|    | Search                                           | Result |
|----|--------------------------------------------------|--------|
| 1  | inequality.mp. or Socioeconomic Factors/         | 183584 |
| 2  | inequalities.mp.24364                            |        |
| 3  | protected characteristics.mp. 10                 |        |
| 4  | inclusion health groups.mp. 3                    |        |
| 5  | Homeless Persons/ or homeless.mp. 12922          |        |
| 6  | migrant\$.mp. or "Transients and Migrants"/      | 26370  |
| 7  | Sex Work/ or Sex Workers/ or sex work*.mp. 10781 |        |
| 8  | Gypsy roma.mp. 18                                |        |
| 9  | Human immunodeficiency virus/                    | 21059  |
| 10 | acquired immune deficiency syndrome/ 77137       |        |
| 11 | infection/ 40269                                 |        |
| 12 | tuberculosis/ 108757                             |        |
| 13 | parasitosis/ 0                                   |        |
| 14 | hepatitis/ 22837                                 |        |
| 15 | Vaccination/ 90391                               |        |
| 16 | Immunization/ 52361                              |        |
| 17 | Communicable Disease/31146                       |        |
| 18 | infectious disease.ti,ab,kw. 39865               |        |
| 19 | infection.ti,ab,kw. 1211775                      |        |
| 20 | tuberculosis.ti,ab,kw. 203159                    |        |
| 21 | hiv.ti,ab,kw. 331192                             |        |
| 22 | aids.ti,ab,kw. 156336                            |        |
| 23 | hepatitis.ti,ab,kw. 228655                       |        |
| 24 | "immuni*".ti,ab,kw. 342218                       |        |
| 25 | "vaccin*".ti,ab,kw. 354100                       |        |
| 26 | Communicable disease.ti,ab,kw.4291               |        |

1  
2  
3 27 Parasitic disease.ti,ab,kw. 3780  
4  
5 28 infectious disease\$.mp. or Communicable Diseases/ 145081  
6  
7 29 (((systematic or state-of-the-art or scoping or literature or umbrella) adj (review\* or  
8 overview\* or assessment\*)) or "review\* of reviews" or meta-analy\* or metaanaly\* or ((systematic or  
9 evidence) adj1 assess\*) or "research evidence" or metasynthe\* or meta-synthe\*).tw. or exp Review  
10 Literature as Topic/ or exp Review/ or Meta-Analysis as Topic/ or Meta-Analysis/ or "systematic  
11 review"/ 3165549  
12  
13 30 1 or 2 or 3 or 4 or 5 or 6 or 7 or 8 240954  
14  
15 31 9 or 10 or 11 or 12 or 13 or 14 or 15 or 16 or 17 or 18 or 19 or 20 or 21 or 22 or 23 or 24 or  
16 25 or 26 or 27 or 28 2364192  
17  
18 32 30 and 31 32588  
19  
20 33 29 and 32 2822  
21  
22 34 social class.mp. or social class/ 48149  
23  
24 35 poverty.mp. or poverty/ 65773  
25  
26 36 income.mp. or income/ 162454  
27  
28 37 educational status.mp. or educational status/ 58473  
29  
30 38 economic status.mp. or economic status/ 15731  
31  
32 39 travellers.mp. 4716  
33  
34 40 rough sleeping.mp. 23  
35  
36 41 homelessness/ 8802  
37  
38 42 30 or 34 or 35 or 36 or 37 or 38 or 39 or 40 or 41 476015  
39  
40 43 sexually transmitted disease/ or STI.mp. 32214  
41  
42 44 AMR.mp. 5408  
43  
44 45 antimicrobial resistance.mp. or antibiotic resistance/ 85277  
45  
46 46 anti-microbial resistance.mp. 196  
47  
48 47 31 or 43 or 44 or 45 or 46 2444675  
49  
50 48 42 and 47 62612  
51  
52 49 29 and 48 8144  
53  
54 50 limit 49 to yr="2000 -Current" 7318  
55  
56  
57  
58  
59  
60

**Embase Classic+Embase 1947 to 2021 November 23 searched on 24/11/2021**

| Searches                                      | Results |
|-----------------------------------------------|---------|
| 1 inequality.mp. or Socioeconomic Factors/    | 159438  |
| 2 inequalities.mp.26580                       |         |
| 3 protected characteristics.mp. 18            |         |
| 4 inclusion health groups.mp. 3               |         |
| 5 Homeless Persons/ or homeless.mp. 12270     |         |
| 6 migrant\$.mp. or "Transients and Migrants"/ | 59556   |
| 7 Sex Work/ or Sex Workers/ or sex work*.mp.  | 14114   |
| 8 Gypsy roma.mp. 22                           |         |
| 9 Human immunodeficiency virus/               | 125500  |
| 10 acquired immune deficiency syndrome/       | 136979  |
| 11 infection/ 402825                          |         |
| 12 tuberculosis/ 162052                       |         |
| 13 parasitosis/ 24410                         |         |
| 14 hepatitis/ 67370                           |         |
| 15 Vaccination/ 179733                        |         |
| 16 Immunization/ 117275                       |         |
| 17 Communicable Disease/34287                 |         |
| 18 infectious disease.ti,ab,kw. 50469         |         |
| 19 infection.ti,ab,kw. 1631799                |         |
| 20 tuberculosis.ti,ab,kw. 245043              |         |
| 21 hiv.ti,ab,kw. 426227                       |         |
| 22 aids.ti,ab,kw. 190986                      |         |
| 23 hepatitis.ti,ab,kw. 334114                 |         |
| 24 "immuni*" .ti,ab,kw. 440252                |         |
| 25 "vaccin*" .ti,ab,kw. 438145                |         |
| 26 Communicable disease.ti,ab,kw.5111         |         |
| 27 Parasitic disease.ti,ab,kw. 4822           |         |



1  
2  
3 28 infectious disease\$.mp. or Communicable Diseases/ 150812  
4  
5 29 1 or 2 or 3 or 4 or 5 or 6 or 7 or 8 254578  
6  
7 30 9 or 10 or 11 or 12 or 13 or 14 or 15 or 16 or 17 or 18 or 19 or 20 or 21 or 22 or 23 or 24 or  
8 25 or 26 or 27 or 28 3242281  
9  
10 31 29 and 30 37750  
11  
12 32 (((systematic or state-of-the-art or scoping or literature or umbrella) adj (review\* or  
13 overview\* or assessment\*)) or "review\* of reviews" or meta-analy\* or metaanaly\* or ((systematic or  
14 evidence) adj1 assess\*) or "research evidence" or metasynthe\* or meta-synthe\*).tw. or systematic  
15 review/ or "systematic review (topic)"/ or meta analysis/ or "meta analysis (topic)"/ 713296  
16  
17 33 31 and 32 1343  
18  
19 34 social class.mp. or social class/ 40328  
20  
21 35 poverty.mp. or poverty/ 64722  
22  
23 36 income.mp. or income/ 221004  
24  
25 37 educational status.mp. or educational status/ 90042  
26  
27 38 economic status.mp. or economic status/ 23383  
28  
29 39 travellers.mp. 6111  
30  
31 40 rough sleeping.mp. 30  
32  
33 41 homelessness/ 12187  
34  
35 42 29 or 34 or 35 or 36 or 37 or 38 or 39 or 40 or 41 588825  
36  
37 43 sexually transmitted disease/ or STI.mp. 62753  
38  
39 44 AMR.mp. 9242  
40  
41 45 antimicrobial resistance.mp. or antibiotic resistance/ 188533  
42  
43 46 anti-microbial resistance.mp. 289  
44  
45 47 30 or 43 or 44 or 45 or 46 3400990  
46  
47 48 32 and 42 and 47 4243  
48  
49 49 limit 48 to yr="2000 -Current" 4212  
50  
51  
52  
53  
54  
55  
56  
57  
58  
59  
60

**Searched Web of Science on 24/11/2021 (Web of Science Core Collection)**

*Inequalities related terms searched in topics and combined with title search for infectious diseases. This makes the search capture inequality related articles where inequalities are not necessarily mentioned in the title. Had to limit the infectious diseases to titles in order to focus on relevant papers.*

|    |                                                                                                                                                                                                                                                                                                                                                                                                                                           |        |
|----|-------------------------------------------------------------------------------------------------------------------------------------------------------------------------------------------------------------------------------------------------------------------------------------------------------------------------------------------------------------------------------------------------------------------------------------------|--------|
| #1 | (inequalities OR inequality OR "Socioeconomic Factor" OR "protected characteristics" OR inclusion health groups OR "Homeless Person*" OR homelessness OR Transients OR Migrant* OR "Sex Work*" OR "Gypsy roma" OR "rough sleeping" OR traveller* OR "traveller community" OR "traveller communities" OR "economic status" OR "educational status" OR income OR poverty OR "social class") (Topic) and Review (Document Type)              | 53,359 |
| #2 | ("Human immunodeficiency virus" OR HIV OR "acquired immune deficiency syndrome" OR AIDS OR infection OR tuberculosis OR parasitosis OR hepatitis OR vaccination OR immunization OR "communicable disease*" OR "infectious disease*" OR "parasitic disease*" OR "sexually transmitted diseases*" OR STI OR AMR OR "antimicrobial resistance" OR "anti-microbial resistance" OR "antibiotic resistance") (Title) and Review (Document Type) | 64,026 |
| #3 | #1 AND #2<br>Timespan: 2000-01-01 to 2021-11-24 (Publication Date)                                                                                                                                                                                                                                                                                                                                                                        | 3,038  |

**Searched Opengrey on 24112021**

(inequalities OR inequality OR "Socioeconomic Factor" OR "protected characteristics" OR inclusion health groups OR "Homeless Person\*" OR homelessness OR Transients OR Migrant\* OR "Sex Work\*" OR "Gypsy roma" OR "rough sleeping" OR traveller\* OR "traveller community" OR "traveller communities" OR "economic status" OR "educational status" OR income OR poverty OR "social class") AND ("Human immunodeficiency virus" OR HIV OR "acquired immune deficiency syndrome" OR AIDS OR infection OR tuberculosis OR parasitosis OR hepatitis OR vaccination OR immunization OR "communicable disease\*" OR "infectious disease\*" OR "parasitic disease\*" OR "sexually transmitted diseases\*" OR STI OR AMR OR "antimicrobial resistance" OR "anti-microbial resistance" OR "antibiotic resistance")

**145** articles retrieved with the search

APPENDIX 2: EVIDENCE MATRIX

| Dimension of inequalities | Variables | Infectious diseases: Author, year (number of UK studies included) |                                                                    |                                                                               |                                                                     |                                                                                                                                                                                                                                                                                                             |                                                                                                          |                                                                                                                                                                                                                                                                                                                                                                                                                                                |
|---------------------------|-----------|-------------------------------------------------------------------|--------------------------------------------------------------------|-------------------------------------------------------------------------------|---------------------------------------------------------------------|-------------------------------------------------------------------------------------------------------------------------------------------------------------------------------------------------------------------------------------------------------------------------------------------------------------|----------------------------------------------------------------------------------------------------------|------------------------------------------------------------------------------------------------------------------------------------------------------------------------------------------------------------------------------------------------------------------------------------------------------------------------------------------------------------------------------------------------------------------------------------------------|
|                           |           | Tuberculosis                                                      | HIV                                                                | STI                                                                           | Hepatitis C                                                         | immunisation                                                                                                                                                                                                                                                                                                | AMR/multi-drug resistance                                                                                | Other infectious diseases                                                                                                                                                                                                                                                                                                                                                                                                                      |
| Protected characteristics | Age       | Nava-Aguilera, 2009 (1)<br>Schepisi, 2018 (13)                    | Ghiasvand, 2020 (0)<br>Behera, 2018 (unclear)<br>Sultana, 2021 (0) | Crichton, 2015 (3)<br>Denning, 2018 (2)<br>Wu, 2021 (0)<br>Mirzadeh, 2021 (2) | Colledge, 2020 (16)<br>Greenaway, 2015 (0)<br>Dugan, 2021 (unclear) | Vet, 2015 (0)<br>Okoli, 2020 (1)<br>Gorjana, 2017 (1)<br>Fernández, 2015 (8)<br>Tabacchi, 2016 (19)<br>Nagata, 2013 (unclear, at least 1)<br>Falagas, 2008 (1)<br>Hermann, 2019 (15)<br>Tauli, 2016 (0)<br>Malerba, 2015 (1)<br>Okoli, 2021 (2)<br>Roller-Wirnsberger, 2021 (at least 1)<br>Faria, 2021 (0) | Abraha, 2018 (unclear, at least 1)<br>Faustini, 2005 (3)<br>Song, 2021 (at least 2)<br>Sultana, 2021 (0) | Leumi, 2020 (unclear)<br>Macina, 2021 (7)<br>Lafond, 2021 (unclear)<br>Dong, 2020 (unclear)<br>Bonten, 2020 (21)<br>Ly, 2021 (4)<br>Li, 2020 (7)<br>Rostami, 2019a (2)<br>Rostami, 2019b (3)<br>Rostami, 2021 (2)<br>Badri, 2021 (4)<br>Schierhout, 2020 (0)<br>Adams, 2018 (unclear, at least 1)<br>Zamani, 2018 (2)<br>Lindsay, 2015 (4)<br>Possenti, 2016 (0)<br>Richterman, 2018 (0)<br>Strifler, 2015 (6)<br>Spyromitrou-Xioufi, 2020 (0) |

| Dimension of inequalities | Variables                      | Infectious diseases: Author, year (number of UK studies included) |                                                                                                                                                                  |                                                                                           |                                                                  |                                                                                                                                           |                                                          |                                                                                                                                                                                                                                                                                        |
|---------------------------|--------------------------------|-------------------------------------------------------------------|------------------------------------------------------------------------------------------------------------------------------------------------------------------|-------------------------------------------------------------------------------------------|------------------------------------------------------------------|-------------------------------------------------------------------------------------------------------------------------------------------|----------------------------------------------------------|----------------------------------------------------------------------------------------------------------------------------------------------------------------------------------------------------------------------------------------------------------------------------------------|
|                           |                                | Tuberculosis                                                      | HIV                                                                                                                                                              | STI                                                                                       | Hepatitis C                                                      | immunisation                                                                                                                              | AMR/multi-drug resistance                                | Other infectious diseases                                                                                                                                                                                                                                                              |
|                           | Sex                            | Beijer, 2012 (4)<br>Nava-Aguilera, 2009 (1)                       | Beijer, 2012 (0)<br>Operario, 2008 (0)<br>Van Gerwen, 2020 (0)<br>Leung, 2019 (unclear)<br>Eilami, 2019 (1)<br>Kabapy, 2020 (unclear)<br>McBride, 2021 (unclear) | Crichton, 2015 (3)<br>Van Gerwen, 2020 (0)<br>Whelan, 2021 (1)<br>McBride, 2021 (unclear) | Beijer, 2012 (1)<br>Colledge, 2020 (16)<br>Leung, 2019 (unclear) | Pulver, 2016 (1)<br>Tabacchi, 2016 (19)<br>Nagata, 2013 (unclear, at least 1)<br>Roller-Wirnsberger, 2021 (at least 1)<br>Faria, 2021 (0) | Abraha, 2018 (unclear, at least 1)<br>Faustini, 2005 (3) | Leung, 2019 (unclear)<br>Aldridge, 2018 (unclear, at least 1)<br>Ly, 2021 (4)<br>Spyromitrou-Xioufi, 2020 (0)<br>Possenti, 2016 (0)<br>Richterman, 2018 (0)<br>Rostami, 2021 (2)<br>Schierhout, 2020 (0)<br>Fauroux, 2017 (8)<br>Rostami, 2019a (2)<br>Badri, 2021 (4)<br>Li, 2020 (7) |
|                           | Marriage and civil partnership |                                                                   |                                                                                                                                                                  |                                                                                           |                                                                  | Okoli, 2020 (1)<br>Nagata, 2013 (unclear, at least 1)<br>Jain, 2017 (5)<br>Tabacchi, 2016 (19)<br>Okoli, 2021 (2)<br>Faria, 2021 (0)      |                                                          |                                                                                                                                                                                                                                                                                        |
|                           | Pregnancy and maternity        |                                                                   |                                                                                                                                                                  |                                                                                           | Hahne, 2013 (9)<br>Greenaway, 2015 (0)                           |                                                                                                                                           |                                                          | Hahne, 2013 (9)<br>Leumi, 2020 (unclear)                                                                                                                                                                                                                                               |

1  
2  
3  
4  
5  
6  
7  
8  
9  
10  
11  
12  
13  
14  
15  
16  
17  
18  
19  
20  
21  
22  
23  
24  
25  
26  
27  
28  
29  
30  
31  
32  
33  
34  
35  
36  
37  
38  
39  
40  
41  
42  
43  
44  
45  
46

| Dimension of inequalities | Variables           | Infectious diseases: Author, year (number of UK studies included)             |                                                         |                               |             |                                                                                                                                                                                                                                               |                                    |                                 |
|---------------------------|---------------------|-------------------------------------------------------------------------------|---------------------------------------------------------|-------------------------------|-------------|-----------------------------------------------------------------------------------------------------------------------------------------------------------------------------------------------------------------------------------------------|------------------------------------|---------------------------------|
|                           |                     | Tuberculosis                                                                  | HIV                                                     | STI                           | Hepatitis C | immunisation                                                                                                                                                                                                                                  | AMR/multi-drug resistance          | Other infectious diseases       |
|                           |                     |                                                                               |                                                         |                               |             |                                                                                                                                                                                                                                               |                                    | Nourollahpour Shiadeh, 2020 (0) |
|                           | Race (or ethnicity) | Nava-Aguilera, 2009 (1)<br>Offer, 2015 (18) <sup>α</sup><br>Kawatsu, 2014 (1) | Millett, 2012 (13)<br>Prost, 2007 (unclear, at least 3) | Wayal, 2018 (15) <sup>α</sup> |             | Vet, 2015 (0)<br>Okoli, 2020 (1)<br>Gorjana, 2017 (1)<br>Fernández, 2015 (8)<br>Fisher, 2013 (1)<br>Tabacchi, 2016 (19)<br>Nagata, 2013 (unclear, at least 1)<br>Falagas, 2008 (1)<br>Tauli, 2016 (0)<br>Malerba, 2015 (0)<br>Okoli, 2021 (2) | Abraha, 2018 (unclear, at least 1) | Ly, 2021 (4)                    |
|                           | Religion or belief  |                                                                               |                                                         |                               |             | Fisher, 2013 (1)<br>Jain, 2017 (5)<br>Fournet, 2018 (unclear, at least 1)<br>Malerba, 2015 (0)<br>Falagas, 2008 (1)                                                                                                                           |                                    | Spyromitrou-Xioufi, 2020 (0)    |

| Dimension of inequalities | Variables           | Infectious diseases: Author, year (number of UK studies included)                                                |                                                                                                                                   |                                                                                                 |                                                                                                                      |                                                                                                  |                                         |                                                                                                                                                    |
|---------------------------|---------------------|------------------------------------------------------------------------------------------------------------------|-----------------------------------------------------------------------------------------------------------------------------------|-------------------------------------------------------------------------------------------------|----------------------------------------------------------------------------------------------------------------------|--------------------------------------------------------------------------------------------------|-----------------------------------------|----------------------------------------------------------------------------------------------------------------------------------------------------|
|                           |                     | Tuberculosis                                                                                                     | HIV                                                                                                                               | STI                                                                                             | Hepatitis C                                                                                                          | immunisation                                                                                     | AMR/multi-drug resistance               | Other infectious diseases                                                                                                                          |
|                           | Sexual orientation  |                                                                                                                  | Fakoya, 2015 (9)<br>Oldenburg, 2014 (1)<br>Operario, 2008 (0)<br>Chen, 2019 (1)                                                   |                                                                                                 | Hahne, 2013 (9)<br>Jin, 2020 (at least 14)                                                                           |                                                                                                  | Abraha, 2018 (unclear, at least 1)      | Hahne, 2013 (9)<br>Leumi, 2020 (unclear)<br>Ly, 2021 (4)<br>Stockdale, 2020 (unclear, at least 1)                                                  |
|                           | Gender reassignment |                                                                                                                  | Operario, 2008 (0)                                                                                                                |                                                                                                 |                                                                                                                      |                                                                                                  |                                         | Leumi, 2020 (unclear)                                                                                                                              |
|                           | Disability          |                                                                                                                  |                                                                                                                                   |                                                                                                 |                                                                                                                      |                                                                                                  |                                         | Newman, 2015 (3)                                                                                                                                   |
| Inclusion Health Groups   | Vulnerable migrants |                                                                                                                  | Yu, 2020 (0)                                                                                                                      | Yu, 2020 (0)                                                                                    | Chernet, 2017 (unclear)<br>Greenaway, 2015 (0)                                                                       | Mipatrini, 2017 (7)<br>De Vito, 2017 (4)                                                         | Nellums, 2018 (0)                       | Rossi, 2012 (2)<br>Chernet, 2017 (unclear)<br>Mipatrini, 2017 (7)<br>Chernet, 2017 (unclear)                                                       |
|                           | General migrants    | Tavares, 2017 (2) <sup>β</sup><br>Chan, 2017 (1)<br>Kawatsu, 2014 (1)<br>Sandgren, 2014 (1)<br>Jackson, 2021 (3) | Tavares, 2017 (2) <sup>β</sup><br>Platt, 2013a (1)<br>Platt, 2013b (5)<br>Prost, 2007 (unclear, at least 3)<br>Kentikelenis, 2015 | Platt, 2011a (1)<br>Platt, 2013b (5)<br>Kentikelenis, 2015 (unclear)<br>McBride, 2021 (unclear) | Hahne, 2013 (9)<br>Chernet, 2017 (unclear)<br>Greenaway, 2015 (0)<br>Kentikelenis, 2015 (unclear)<br>Falla, 2018 (1) | Okoli, 2020 (1)<br>Mipatrini, 2017 (7)<br>De Vito, 2017 (4)<br>Jain, 2017 (5)<br>Tauli, 2016 (0) | Faustini, 2005 (3)<br>Jackson, 2021 (3) | Rossi, 2012 (2)<br>Hahne, 2013 (9)<br>Chernet, 2017 (unclear)<br>Kentikelenis, 2015 (unclear)<br>Suhrcke, 2011 (unclear)<br>Morais, 2017 (unclear) |

| Dimension of inequalities | Variables                                            | Infectious diseases: Author, year (number of UK studies included) |                                                                                          |                              |                                    |                                     |                                      |                                                                                 |
|---------------------------|------------------------------------------------------|-------------------------------------------------------------------|------------------------------------------------------------------------------------------|------------------------------|------------------------------------|-------------------------------------|--------------------------------------|---------------------------------------------------------------------------------|
|                           |                                                      | Tuberculosis                                                      | HIV                                                                                      | STI                          | Hepatitis C                        | immunisation                        | AMR/multi-drug resistance            | Other infectious diseases                                                       |
|                           |                                                      |                                                                   | (unclear)<br>Pega 2021<br>(1)<br>Kabapy, 2020<br>(unclear)<br>McBride, 2021<br>(unclear) |                              |                                    |                                     |                                      |                                                                                 |
|                           | People experiencing homelessness and rough sleeping  | Beijer, 2012 (4)<br>Nava-Aguilera, 2009 (1)<br>Kawatsu, 2014 (1)  | Beijer, 2012 (0)<br>Arum, 2021 (6)                                                       |                              | Beijer, 2012 (1)<br>Arum, 2021 (6) |                                     | Alividza, 2018 (unclear, at least 2) | Aldridge, 2018 (unclear, at least 1)<br>Suhrcke, 2011 (unclear)<br>Ly, 2021 (4) |
|                           | People who engage in sex work                        |                                                                   | Yu, 2020 (0)<br>Oldenburg, 2015 (0)<br>Operario, 2008 (0)<br>Kabapy, 2020 (unclear)      | Yu, 2020 (0)<br>Wu, 2021 (0) |                                    | Vet, 2015 (0)                       |                                      | Leumi, 2020 (unclear)<br>Stockdale, 2020 (unclear, at least 1)                  |
|                           | Gypsy Roma/ Traveller communities /Indigenous people | Tollefson, 2013 (0)<br>Cormier 2019 (0)                           |                                                                                          |                              |                                    | Fournet, 2018 (unclear, at least 1) |                                      |                                                                                 |

| Dimension of inequalities  | Variables                 | Infectious diseases: Author, year (number of UK studies included) |                                                                                                |                    |             |                                                                                                                                                                                                                                                                                                                                                                                                                       |                                                                                      |                                                                                                                                                                                                                                    |
|----------------------------|---------------------------|-------------------------------------------------------------------|------------------------------------------------------------------------------------------------|--------------------|-------------|-----------------------------------------------------------------------------------------------------------------------------------------------------------------------------------------------------------------------------------------------------------------------------------------------------------------------------------------------------------------------------------------------------------------------|--------------------------------------------------------------------------------------|------------------------------------------------------------------------------------------------------------------------------------------------------------------------------------------------------------------------------------|
|                            |                           | Tuberculosis                                                      | HIV                                                                                            | STI                | Hepatitis C | immunisation                                                                                                                                                                                                                                                                                                                                                                                                          | AMR/multi-drug resistance                                                            | Other infectious diseases                                                                                                                                                                                                          |
| Socioeconomic inequalities | Level of education/income | Kawatsu, 2014 (1)                                                 | Rodrigo, 2010 (unclear)<br>Ghiasvand, 2020 (0)<br>Millett, 2012 (13)<br>Kabapy, 2020 (unclear) | Crichton, 2015 (3) |             | Vet, 2015 (0)<br>Larson, 2014 (at least one)<br>Okoli, 2020 (1)<br>Arat, 2019 (2)<br>Fernández, 2015 (8)<br>Forshaw, 2017 (0)<br>Fisher, 2013 (1)<br>Tabacchi, 2016 (19)<br>Nagata, 2013 (unclear, at least 1)<br>Lucyk, 2019 (1)<br>De Vito, 2017 (4)<br>Bocquier, 2017 (5)<br>Jain, 2017 (5)<br>Tauli, 2016 (0)<br>Malerba, 2015 (0)<br>Okoli, 2021 (2)<br>Roller-Wirnsberger, 2021 (at least 1)<br>Faria, 2021 (0) | Di Gennaro, 2017 (1)<br>Alividza, 2018 (unclear, at least 2)<br>Najafizada, 2020 (4) | Ding, 2020 (0)<br>Coffey, 2018 (unclear)<br>Adams, 2018 (unclear, at least 1)<br>Newman, 2015 (3)<br>Possenti, 2016 (0)<br>Richterman, 2018 (0)<br>Spyromitrou-Xioufi, 2020 (0)<br>Dong, 2020 (unclear)<br>Suhrcke, 2011 (unclear) |



| Dimension of inequalities | Variables                                    | Infectious diseases: Author, year (number of UK studies included) |                                                    |                                                    |                              |                                                                                                                                                                                                                                                 |                           |                                                                                                                                 |
|---------------------------|----------------------------------------------|-------------------------------------------------------------------|----------------------------------------------------|----------------------------------------------------|------------------------------|-------------------------------------------------------------------------------------------------------------------------------------------------------------------------------------------------------------------------------------------------|---------------------------|---------------------------------------------------------------------------------------------------------------------------------|
|                           |                                              | Tuberculosis                                                      | HIV                                                | STI                                                | Hepatitis C                  | immunisation                                                                                                                                                                                                                                    | AMR/multi-drug resistance | Other infectious diseases                                                                                                       |
|                           | Employment /occupation                       | Kawatsu, 2014 (1)                                                 | Kentikelenis, 2015 (unclear)<br>Millett, 2012 (13) | Crichton, 2015 (3)<br>Kentikelenis, 2015 (unclear) | Kentikelenis, 2015 (unclear) | Arat, 2019 (2)<br>Tabacchi, 2016 (19)<br>Nagata, 2013 (unclear, at least 1)<br>Lucyk, 2019 (1)<br>De Vito, 2017 (4)<br>Bocquier, 2017 (5)<br>Tauli, 2016 (0)<br>Malerba, 2015 (0)<br>Okoli, 2021 (2)<br>Faria, 2021 (0)                         |                           | Kentikelenis, 2015 (unclear)<br>Li, 2020 (7)<br>Coffey, 2018 (unclear)<br>Adams, 2018 (unclear, at least 1)<br>Newman, 2015 (3) |
|                           | Social class/Area level socioeconomic status |                                                                   | Salgado-Barreira, 2014 (1) <sup>v</sup>            |                                                    |                              | Arat, 2019 (2)<br>Okoli, 2020 (1)<br>Fernández, 2015 (8)<br>Nagata, 2013 (unclear, at least 1)<br>Lucyk, 2019 (1)<br>Jain, 2017 (5)<br>Falagas, 2008 (1)<br>Tauli, 2016 (0)<br>Malerba, 2015 (0)<br>Okoli, 2021 (2)<br>Roller-Wirnsberger, 2021 |                           | Salgado-Barreira, 2014 (1)                                                                                                      |

| Dimension of inequalities | Variables                                                                                                        | Infectious diseases: Author, year (number of UK studies included) |     |                    |             |                                                                                                                                                              |                                                              |                                                                                                                                                                                                                                  |
|---------------------------|------------------------------------------------------------------------------------------------------------------|-------------------------------------------------------------------|-----|--------------------|-------------|--------------------------------------------------------------------------------------------------------------------------------------------------------------|--------------------------------------------------------------|----------------------------------------------------------------------------------------------------------------------------------------------------------------------------------------------------------------------------------|
|                           |                                                                                                                  | Tuberculosis                                                      | HIV | STI                | Hepatitis C | immunisation                                                                                                                                                 | AMR/multi-drug resistance                                    | Other infectious diseases                                                                                                                                                                                                        |
|                           | Deprivation                                                                                                      | Offer, 2015 (18) <sup>a</sup>                                     |     | Crichton, 2015 (3) |             | Vukovic, 2019 (6)<br>Fisher, 2013 (1)<br>Nagata, 2013 (unclear, at least 1)<br>Lucyk, 2019 (1)                                                               |                                                              | Adams, 2018 (unclear, at least 1)<br>Newman, 2015 (3)                                                                                                                                                                            |
|                           | Residence/living situation (e.g urban vs rural, living in a home environment with moisture damage, house tenure) | Nava-Aguilera, 2009 (1)<br>Cormier 2019 (0)                       |     |                    |             | Okoli, 2020 (1)<br>Fernández, 2015 (8)<br>Tabacchi, 2016 (19)<br>Nagata, 2013 (unclear, at least 1)<br>Tauli, 2016 (0)<br>Okoli, 2021 (2)<br>Faria, 2021 (0) | Alividza, 2018 (unclear, at least 2)<br>Najafizada, 2020 (4) | Ly, 2021 (4)<br>Dong, 2020 (unclear)<br>Spyromitrou-Xioufi, 2020 (0)<br>Newman, 2015 (3)<br>Possenti, 2016 (0)<br>Richterman, 2018 (0)<br>Coffey, 2018 (unclear)<br>Rostami, 2021 (2)<br>Fauroux, 2017 (8)<br>Rostami, 2019a (2) |

**APPENDIX 3: QUALITY ASSESSMENT OF INDIVIDUAL REVIEWS USING ASSESSMENT OF MULTIPLE SYSTEMATIC REVIEWS VERSION 2 (AMSTAR2)  
CHECKLIST**

| Study ID<br>(Author, Year) | 1 | 2   | 3 | 4   | 5 | 6 | 7 | 8   | 9   | 10 | 11    | 12    | 13 | 14 | 15    | 16 |
|----------------------------|---|-----|---|-----|---|---|---|-----|-----|----|-------|-------|----|----|-------|----|
| Tavares, 2017              | Y | N   | Y | P Y | N | N | N | Y   | N   | N  | N M C | N M C | Y  | N  | N M C | Y  |
| Tollefson, 2013            | Y | N   | N | P Y | Y | Y | N | Y   | N   | N  | N M C | N M C | N  | N  | N M C | Y  |
| Vet, 2015                  | Y | N   | N | P Y | N | N | N | P Y | Y   | N  | N M C | N M C | Y  | N  | N M C | Y  |
| Beijer 2012                | Y | N   | N | P Y | N | Y | N | Y   | N   | N  | Y     | Y     | N  | Y  | N     | Y  |
| Behera, 2018               | Y | N   | N | P Y | N | N | N | N   | N   | N  | N M C | N M C | N  | N  | N M C | Y  |
| Vukovic, 2019              | Y | N   | N | P Y | Y | Y | N | Y   | Y   | N  | N M C | N M C | N  | N  | N M C | Y  |
| Platt, 2013a               | Y | N   | N | P Y | N | N | N | Y   | P Y | N  | N M C | N M C | Y  | Y  | N M C | Y  |
| Platt, 2013b               | Y | N   | N | Y   | N | N | N | N   | P Y | N  | N M C | N M C | Y  | Y  | N M C | Y  |
| Prost, 2007                | Y | N   | N | Y   | N | N | N | P Y | N   | N  | N M C | N M C | N  | N  | N M C | N  |
| Pulver, 2016               | Y | N   | N | P Y | Y | Y | N | Y   | N   | N  | N M C | N M C | Y  | Y  | N M C | N  |
| Rossi, 2012                | Y | P Y | N | Y   | Y | Y | N | P Y | N   | N  | Y     | N     | N  | Y  | N     | Y  |
| Rostami, 2019              | Y | Y   | N | P Y | N | Y | N | P Y | N   | N  | Y     | N     | Y  | Y  | Y     | Y  |
| Di Gennaro,<br>2017        | Y | N   | N | P Y | N | Y | N | Y   | Y   | N  | Y     | Y     | Y  | Y  | Y     | N  |
| Fauroux, 2017              | Y | P Y | N | Y   | N | N | N | Y   | Y   | N  | N M C | N M C | Y  | Y  | N M C | Y  |

| Study ID<br>(Author, Year) | 1 | 2   | 3 | 4   | 5 | 6 | 7 | 8   | 9   | 10 | 11    | 12    | 13 | 14 | 15    | 16 |
|----------------------------|---|-----|---|-----|---|---|---|-----|-----|----|-------|-------|----|----|-------|----|
| Hahne, 2013                | Y | P Y | N | P Y | N | Y | N | N   | P Y | N  | N M C | N M C | N  | Y  | N M C | Y  |
| Jin, 20                    | Y | Y   | N | P Y | Y | N | N | N   | P Y | N  | Y     | Y     | Y  | Y  | N     | Y  |
| Larson, 2014               | N | N   | N | P Y | N | N | N | N   | N   | N  | N M C | N M C | N  | N  | N M C | Y  |
| Nava-Aguilera,<br>2009     | N | N   | N | P Y | N | Y | N | Y   | Y   | N  | Y     | Y     | Y  | Y  | Y     | N  |
| Okoli, 2020                | Y | Y   | N | P Y | Y | Y | N | Y   | Y   | N  | Y     | Y     | Y  | Y  | Y     | Y  |
| Schierhout,<br>2020        | N | N   | N | P Y | Y | N | N | P Y | Y   | N  | Y     | Y     | Y  | Y  | Y     | Y  |
| Wayal, 2018                | Y | N   | N | Y   | N | Y | N | Y   | Y   | N  | N M C | N M C | Y  | Y  | N M C | Y  |
| Yu, 2020                   | Y | N   | N | P Y | N | N | N | Y   | N   | N  | N M C | N M C | N  | N  | N M C | Y  |
| Gorjana, 2017              | Y | N   | N | P Y | N | N | N | Y   | Y   | N  | N M C | N M C | Y  | Y  | N M C | Y  |
| Rodrigo, 2010              | Y | N   | N | P Y | N | Y | N | N   | N   | N  | N M C | N M C | N  | N  | N M C | Y  |
| Rostami, 2019b             | Y | Y   | N | Y   | Y | Y | N | Y   | N   | N  | Y     | Y     | N  | Y  | N     | Y  |
| Coffey, 2018               | Y | N   | N | P Y | N | N | N | N   | Y   | N  | N M C | N M C | N  | Y  | N M C | N  |
| Ghiasvand,<br>2020         | Y | N   | N | P Y | Y | N | N | P Y | Y   | N  | Y     | Y     | Y  | Y  | Y     | Y  |
| Cormier 2019               | Y | N   | N | P Y | Y | N | N | N   | N   | N  | N M C | N M C | N  | N  | N M C | Y  |
| Abraha, 2018               | Y | N   | N | N   | N | N | N | N   | N   | N  | N M C | N M C | N  | Y  | N M C | N  |

| Study ID (Author, Year) | 1 | 2   | 3 | 4   | 5 | 6 | 7 | 8   | 9   | 10 | 11    | 12    | 13 | 14 | 15    | 16 |
|-------------------------|---|-----|---|-----|---|---|---|-----|-----|----|-------|-------|----|----|-------|----|
| Adams, 2018             | Y | Y   | N | Y   | Y | N | N | P Y | Y   | N  | Y     | Y     | Y  | Y  | Y     | N  |
| Aldridge, 2018          | N | N   | N | N   | N | Y | N | N   | N   | N  | Y     | N     | N  | Y  | N     | Y  |
| Alividza, 2018          | Y | N   | N | P Y | Y | N | N | Y   | Y   | N  | N M C | N M C | Y  | N  | N M C | Y  |
| Arat, 2019              | Y | N   | N | P Y | Y | N | N | Y   | N   | N  | N M C | N M C | Y  | Y  | N M C | Y  |
| Chan, 2017              | Y | N   | N | N   | Y | Y | N | N   | Y   | N  | Y     | Y     | Y  | Y  | N     | Y  |
| Chernet,2017            | N | N   | N | P Y | Y | N | N | N   | N   | N  | N     | N     | N  | Y  | N     | Y  |
| Colledge, 2020          | Y | N   | N | N   | N | N | N | N   | N   | N  | N M C | N M C | N  | N  | N M C | Y  |
| Crichton,2015           | Y | P Y | Y | P Y | N | N | N | N   | P Y | N  | Y     | Y     | Y  | Y  | N     | Y  |
| Eilami, 2019            | Y | N   | N | P Y | N | N | N | N   | N   | N  | Y     | N     | N  | Y  | Y     | Y  |
| Fakoya, 2015            | Y | P Y | N | P Y | Y | N | N | P Y | N   | N  | N M C | N M C | Y  | N  | N M C | Y  |
| Faustini, 2005          | Y | N   | N | P Y | N | N | N | N   | N   | N  | Y     | N     | N  | Y  | N     | Y  |
| Fernández, 2015         | Y | N   | N | P Y | N | N | N | Y   | N   | N  | N M C | Y     | Y  | N  | N M C | Y  |
| Forshaw, 2017           | Y | N   | N | P Y | Y | N | N | Y   | P Y | N  | Y     | N     | Y  | Y  | Y     | Y  |
| Fisher, 2013            | Y | N   | N | P Y | N | N | N | Y   | N   | N  | Y     | Y     | Y  | Y  | N     | Y  |
| Greenaway, 2015         | Y | N   | N | P Y | N | N | N | N   | Y   | N  | Y     | N     | N  | Y  | N     | Y  |

| Study ID<br>(Author, Year) | 1 | 2   | 3 | 4   | 5 | 6 | 7 | 8   | 9   | 10 | 11    | 12    | 13 | 14 | 15    | 16 |
|----------------------------|---|-----|---|-----|---|---|---|-----|-----|----|-------|-------|----|----|-------|----|
| Sandgren,<br>2014.         | Y | N   | N | P Y | Y | Y | N | Y   | N   | N  | Y     | N     | N  | Y  | N     | N  |
| Schepisi, 2018.            | Y | Y   | N | P Y | Y | N | N | N   | Y   | N  | Y     | N     | N  | Y  | N     | Y  |
| Suhrcke, 2011.             | Y | N   | N | Y   | Y | Y | N | Y   | N   | N  | N M C | N M C | N  | Y  | N M C | Y  |
| Stockdale,<br>2020.        | Y | Y   | N | Y   | Y | Y | N | N   | P Y | N  | Y     | Y     | Y  | Y  | N     | Y  |
| Tabacchi                   | Y | N   | N | Y   | N | N | N | Y   | N   | N  | Y     | N     | N  | Y  | Y     | Y  |
| Strifler                   | Y | N   | N | P Y | Y | Y | N | Y   | Y   | N  | N M C | N M C | N  | Y  | N M C | N  |
| Nagata, 2011               | Y | P Y | N | P Y | N | Y | N | N   | P Y | N  | N M C | N M C | N  | Y  | N M C | Y  |
| Nellums, 2018              | Y | Y   | N | P Y | Y | Y | N | Y   | P Y | N  | Y     | Y     | Y  | Y  | N     | Y  |
| Newman, 2015               | Y | Y   | N | P Y | Y | Y | N | P Y | Y   | N  | Y     | Y     | Y  | Y  | Y     | Y  |
| Oldenburg,<br>2014         | Y | P Y | N | Y   | N | Y | N | N   | Y   | N  | Y     | N     | Y  | Y  | Y     | Y  |
| Oldenburg_2015             | Y | N   | N | P Y | N | Y | N | N   | N   | N  | Y     | N     | N  | Y  | N     | Y  |
| Operario 2008              | Y | N   | N | Y   | Y | Y | N | N   | P Y | N  | Y     | N     | N  | Y  | Y     | N  |
| Offer_2015                 | Y | N   | N | P Y | Y | Y | N | Y   | N   | N  | N M C | N M C | N  | N  | N M C | N  |
| Mipatrini, 2017            | N | N   | Y | N   | Y | N | N | N   | N   | N  | N M C | N M C | N  | N  | N M C | Y  |
| Lucyk, 2019.               | N | N   | N | N   | Y | N | N | P Y | P Y | N  | N M C | N M C | Y  | N  | N M C | Y  |

1  
2  
3  
4  
5  
6  
7  
8  
9  
10  
11  
12  
13  
14  
15  
16  
17  
18  
19  
20  
21  
22  
23  
24  
25  
26  
27  
28  
29  
30  
31  
32  
33  
34  
35  
36  
37  
38  
39  
40  
41  
42  
43  
44  
45  
46

| Study ID (Author, Year)  | 1 | 2 | 3 | 4   | 5 | 6 | 7 | 8   | 9   | 10 | 11    | 12    | 13 | 14 | 15    | 16 |
|--------------------------|---|---|---|-----|---|---|---|-----|-----|----|-------|-------|----|----|-------|----|
| De Vito, 2017            | Y | N | Y | P Y | N | N | N | N   | N   | N  | N M C | N M C | N  | N  | N M C | N  |
| Bocquier, 2017           | Y | N | N | P Y | Y | N | N | N   | N   | N  | N M C | N M C | Y  | Y  | N M C | Y  |
| Morais, 2017             | Y | Y | N | N   | Y | Y | N | N   | N   | N  | N M C | N M C | N  | N  | N M C | Y  |
| Spyromitrou-Xioufi, 2020 | Y | N | N | N   | Y | Y | N | Y   | P Y | N  | Y     | Y     | Y  | Y  | Y     | Y  |
| Van Gerwen, 2020         | Y | N | N | N   | Y | N | N | Y   | N   | N  | Y     | N     | N  | Y  | N     | N  |
| Zamani, 2018.            | N | N | N | N   | Y | N | N | N   | N   | N  | Y     | N     | N  | Y  | N     | Y  |
| Jain, 2017               | Y | N | N | Y   | N | N | N | Y   | Y   | N  | Y     | Y     | Y  | Y  | Y     | Y  |
| Kentikelenis, 2015       | Y | N | N | Y   | N | N | N | N   | N   | N  | N M C | N M C | N  | N  | N M C | Y  |
| Li, P. 2020              | Y | N | N | P Y | Y | Y | N | Y   | Y   | N  | Y     | Y     | Y  | Y  | Y     | Y  |
| Leung,2019               | Y | Y | N | Y   | N | N | N | P Y | N   | N  | Y     | N     | N  | Y  | N     | Y  |
| Lindsay,2015             | Y | N | N | P Y | N | N | N | Y   | N   | N  | N M C | N M C | N  | N  | N M C | Y  |
| Salgado-Barreira         | Y | N | N | P Y | Y | N | N | Y   | N   | N  | N M C | N M C | Y  | Y  | N M C | N  |
| Fournet, 2018.           | N | N | N | N   | Y | N | N | N   | N   | N  | N M C | N M C | N  | N  | N M C | Y  |
| Bonten et al., 2020      | Y | N | N | P Y | N | N | N | N   | N   | N  | Y     | N     | N  | Y  | N     | Y  |

| Study ID<br>(Author, Year)        | 1 | 2 | 3 | 4   | 5 | 6 | 7 | 8   | 9   | 10 | 11    | 12    | 13 | 14 | 15    | 16 |
|-----------------------------------|---|---|---|-----|---|---|---|-----|-----|----|-------|-------|----|----|-------|----|
| Chen et al.,<br>2019              | N | N | N | P Y | N | Y | N | N   | Y   | N  | Y     | Y     | Y  | Y  | Y     | Y  |
| Denning et al.,<br>2018           | N | N | N | Y   | Y | N | N | P Y | P Y | N  | Y     | Y     | N  | N  | N     | Y  |
| Falagas &<br>Zarkadoulia,<br>2008 | Y | N | N | P Y | N | N | N | Y   | N   | N  | N M C | N M C | N  | Y  | N M C | N  |
| Falla et al.,<br>2018             | N | N | N | P Y | N | N | N | N   | P Y | N  | N M C | N M C | N  | Y  | N M C | Y  |
| Hermann et al.,<br>2019           | Y | Y | N | Y   | Y | N | N | N   | Y   | N  | N M C | N M C | Y  | Y  | N M C | N  |
| Millett et al.,<br>2012           | Y | N | N | Y   | N | N | N | N   | N   | N  | Y     | N     | Y  | N  | N     | Y  |
| Kawatsu, 2014                     | Y | N | N | N   | N | N | N | P Y | N   | N  | N M C | N M C | N  | Y  | N M C | Y  |
| Possenti, 2016                    | N | N | N | P Y | N | Y | N | N   | P Y | N  | Y     | Y     | Y  | Y  | Y     | Y  |
| Richterman,<br>2018               | Y | N | N | P Y | Y | Y | N | N   | Y   | N  | Y     | Y     | Y  | Y  | Y     | Y  |
| Tauli, 2016                       | Y | N | N | P Y | N | N | N | Y   | N   | N  | N M C | N M C | N  | N  | N M C | Y  |
| Malerba, 2015                     | Y | N | N | Y   | Y | Y | N | P Y | N   | N  | N M C | N M C | N  | N  | N M C | Y  |
| Leumi, 2020                       | Y | Y | N | Y   | Y | Y | N | Y   | Y   | N  | Y     | Y     | Y  | Y  | Y     | Y  |



1  
2  
3  
4  
5  
6  
7  
8  
9  
10  
11  
12  
13  
14  
15  
16  
17  
18  
19  
20  
21  
22  
23  
24  
25  
26  
27  
28  
29  
30  
31  
32  
33  
34  
35  
36  
37  
38  
39  
40  
41  
42  
43  
44  
45  
46

| Study ID (Author, Year) | 1 | 2   | 3 | 4   | 5 | 6 | 7   | 8   | 9   | 10 | 11    | 12    | 13 | 14 | 15    | 16 |
|-------------------------|---|-----|---|-----|---|---|-----|-----|-----|----|-------|-------|----|----|-------|----|
| Arum, 2021              | Y | Y   | N | P Y | Y | Y | N   | Y   | Y   | N  | Y     | Y     | Y  | Y  | Y     | Y  |
| Mirzadedh, 2021         | Y | N   | N | Y   | Y | N | N   | P Y | Y   | N  | Y     | Y     | Y  | Y  | Y     | Y  |
| Macina, 2021            | Y | N   | N | Y   | N | N | N   | Y   | N   | N  | N M C | N M C | N  | N  | N M C | Y  |
| Ly, 2021                | Y | Y   | N | Y   | Y | N | N   | Y   | N   | N  | N M C | N M C | N  | N  | N M C | Y  |
| Lafond, 2021            | Y | P Y | N | Y   | Y | N | N   | N   | P Y | N  | Y     | Y     | Y  | Y  | N     | Y  |
| McBride                 | Y | N   | N | P Y | N | N | N   | Y   | N   | N  | N M C | N M C | N  | N  | N M C | Y  |
| Ding 2020               | Y | N   | N | Y   | Y | N | N   | Y   | Y   | N  | Y     | Y     | Y  | Y  | Y     | Y  |
| Sultana 2021            | Y | Y   | N | N   | Y | Y | P Y | Y   | Y   | N  | Y     | Y     | Y  | Y  | Y     | Y  |
| Whelan 2021             | Y | N   | N | N   | Y | N | N   | Y   | N   | N  | N M C | N M C | N  | Y  | N M C | Y  |
| Faria 2021              | Y | Y   | N | P Y | Y | Y | N   | Y   | Y   | N  | Y     | Y     | Y  | Y  | N     | Y  |
| Jackson 2021            | Y | Y   | N | P Y | Y | Y | N   | Y   | Y   | N  | Y     | Y     | Y  | Y  | N     | Y  |
| Badri 2021              | Y | N   | N | N   | Y | N | N   | P Y | Y   | N  | Y     | Y     | Y  | Y  | Y     | Y  |
| Dugan 2021              | Y | N   | N | P Y | N | N | N   | N   | P Y | N  | N M C | N M C | Y  | N  | N M C | Y  |
| Kabapy 2020             | Y | Y   | N | P Y | Y | Y | N   | N   | Y   | N  | Y     | Y     | Y  | Y  | Y     | Y  |
| Dong 2020               | Y | N   | Y | N   | Y | Y | N   | N   | Y   | N  | Y     | N     | Y  | N  | N     | Y  |
| Najafizada, 2020        | N | N   | N | N   | N | N | N   | N   | N   | N  | N M C | N M C | N  | N  | N M C | Y  |

| Study ID<br>(Author, Year)    | 1 | 2   | 3 | 4   | 5 | 6 | 7 | 8   | 9 | 10 | 11    | 12    | 13 | 14 | 15    | 16 |
|-------------------------------|---|-----|---|-----|---|---|---|-----|---|----|-------|-------|----|----|-------|----|
| Nurollahpour<br>Shiadeh, 2020 | Y | N   | N | P Y | Y | Y | N | P Y | Y | N  | Y     | Y     | Y  | Y  | N     | Y  |
| Pega 2021                     | Y | P Y | N | P Y | Y | Y | N | Y   | Y | N  | Y     | Y     | Y  | Y  | N     | N  |
| Rostami 2021                  | Y | N   | N | P Y | Y | Y | N | P Y | Y | N  | Y     | Y     | Y  | Y  | Y     | Y  |
| Song, 2021                    | Y | N   | N | P Y | Y | Y | N | Y   | Y | N  | Y     | Y     | Y  | Y  | N     | Y  |
| Wu 2021                       | Y | Y   | Y | Y   | Y | Y | N | Y   | Y | N  | Y     | Y     | Y  | Y  | Y     | Y  |
| Okoli 2020                    | Y | N   | N | N   | Y | Y | N | P Y | Y | N  | Y     | Y     | Y  | Y  | Y     | Y  |
| Roller-Wirnsber<br>ger 2021   | Y | N   | Y | P Y | N | N | N | P Y | N | N  | N M C | N M C | N  | Y  | N M C | N  |

Key: Y=Yes; N=No, P Y = Partial yes and N M C = No meta-analysis conducted

AMSTAR 2 Items:

1. Did the research questions and inclusion criteria for the review include the components of PICO?
2. Did the report of the review contain an explicit statement that the review methods were established prior to the conduct of the review and did the report justify any significant deviations from the protocol?
3. Did the review authors explain their selection of the study designs for inclusion in the review?
4. Did the review authors use a comprehensive literature search strategy?
5. Did the review authors perform study selection in duplicate?
6. Did the review authors perform data extraction in duplicate?

1  
2  
3 7. Did the review authors provide a list of excluded studies and justify the exclusions?  
4

5 8. Did the review authors describe the included studies in adequate detail?  
6

7 9. Did the review authors use a satisfactory technique for assessing the risk of bias (RoB) in individual studies that were included in the review?"  
8

9 10. Did the review authors report on the sources of funding for the studies included in the review?  
10

11 11. If meta-analysis was performed did the review authors use appropriate methods for statistical combination of results?"  
12

13 12. If meta-analysis was performed, did the review authors assess the potential impact of RoB in individual studies on the results of the meta-analysis or  
14 other evidence synthesis?  
15

16 13. Did the review authors account for RoB in individual studies when interpreting/ discussing the results of the review?"  
17

18 14. Did the review authors provide a satisfactory explanation for, and discussion of, any heterogeneity observed in the results of the review?"  
19

20 15. If they performed quantitative synthesis did the review authors carry out an adequate investigation of publication bias (small study bias) and discuss its  
21 likely impact on the results of the review?"  
22

23 16. Did the review authors report any potential sources of conflict of interest, including any funding they received for conducting the review?"  
24  
25  
26  
27  
28  
29  
30  
31  
32  
33  
34  
35  
36  
37  
38  
39  
40  
41  
42  
43  
44  
45  
46

## Characteristics of Included Reviews

| Study ID<br>(Author, Year)      | Corresponding<br>Author's Country | Infectious diseases                                    | Search period    | Includes<br>meta-<br>analysis<br>(Yes/No) | Number of studies<br>included ( <i>Number of<br/>UK studies</i> ) | Publication<br>year range for<br>included<br>studies | Protected<br>characteristics | Socioeconomic<br>inequalities | Inclusion<br>health<br>groups |
|---------------------------------|-----------------------------------|--------------------------------------------------------|------------------|-------------------------------------------|-------------------------------------------------------------------|------------------------------------------------------|------------------------------|-------------------------------|-------------------------------|
| Abraha, 2018 <sup>58</sup>      | Switzerland                       | AMR-Gonorrhoea                                         | 1946-2017        | No                                        | 24 (unclear)                                                      | 1989-2017                                            | ✓                            | ✓                             |                               |
| Adams, 2018 <sup>75</sup>       | UK                                | Gastrointestinal Infection                             | 1980 - 2015      | Yes                                       | 77 (unclear)                                                      | 1995-2015                                            | ✓                            | ✓                             |                               |
| Aldridge, 2018 <sup>46</sup>    | UK                                | Not specified                                          | 2005- 2015       | Yes                                       | 337 (unclear)                                                     | not reported                                         | ✓                            |                               | ✓                             |
| Alividza, 2018 <sup>47</sup>    | UK                                | AMR                                                    | no date limit    | No                                        | 19 (at least 2)                                                   | 1998 to 2015                                         |                              | ✓                             |                               |
| Arat, 2019 <sup>116</sup>       | Sweden                            | Vaccination                                            | not reported     | No                                        | 15 (2)                                                            | 2007-2017                                            |                              | ✓                             |                               |
| Arum, 2021 <sup>50</sup>        | UK                                | HIV, HCV                                               | 2000 - 2017      | Yes                                       | 37 (6)                                                            | 2000 – 2019                                          |                              |                               | ✓                             |
| Badri, 2021 <sup>93</sup>       | Iran                              | Ocular toxocariasis                                    | 1966 - 2019      | Yes                                       | 101 (4)                                                           | 1966 - 2020                                          | ✓                            |                               |                               |
| Behera, 2018 <sup>76</sup>      | India                             | HIV                                                    | Not reported     | No                                        | Not reported                                                      | 1989 - 2017                                          | ✓                            |                               |                               |
| Beijer, 2012 <sup>48</sup>      | UK                                | TB, HCV virus, and HIV                                 | 1980 - 2012      | Yes                                       | 43 (4)                                                            | 1984 - 2011                                          | ✓                            | ✓                             | ✓                             |
| Bocquier 2017 <sup>118</sup>    | France                            | Vaccination                                            | 2000 - 2016      | No                                        | 43 (5)                                                            | Not reported                                         |                              | ✓                             |                               |
| Bonten, 2020 <sup>77</sup>      | Netherlands                       | <i>Escherichia coli</i> bacteraemia                    | 2007- 2018       | Yes                                       | 210 (21)                                                          | 2007-2018                                            | ✓                            |                               |                               |
| Chan, 2017 <sup>18</sup>        | Australia                         | TB                                                     | Inception- 2017  | Yes                                       | 20 (1)                                                            | 1990-2015                                            |                              |                               | ✓                             |
| Chen, 2019 <sup>70</sup>        | China                             | HIV disease                                            | unclear - 2019   | Yes                                       | 101 (1)                                                           | 1984-2017                                            | ✓                            |                               |                               |
| Chernet, 2017 <sup>14</sup>     | Switzerland                       | Six selected infectious diseases                       | not reported     | Yes                                       | 96 (unclear)                                                      | 2000-2017                                            |                              |                               | ✓                             |
| Coffey, 2018 <sup>113</sup>     | Australia                         | Group A Streptococcal infection, acute rheumatic fever | Unclear - 2016   | No                                        | 91 (unclear)                                                      | 1944 - 2016                                          |                              | ✓                             |                               |
| Colledge, 2020 <sup>74</sup>    | Australia                         | HCV                                                    | not reported     | No                                        | 223 (16)                                                          | 2008 -2017                                           | ✓                            | ✓                             |                               |
| Cormier, 2019 <sup>44</sup>     | Canada                            | TB/HIV                                                 | 1980 - 2017.     | No                                        | 475 (0)                                                           | 1984-2017                                            | ✓                            | ✓                             | ✓                             |
| Crichton, 2015 <sup>78</sup>    | UK                                | Genital chlamydia infection                            | Inception - 2014 | Yes                                       | 36 (3)                                                            | not reported                                         | ✓                            | ✓                             |                               |
| De Vito, 2017 <sup>19</sup>     | Denmark                           | Vaccination                                            | 2007- 2017       | No                                        | 35 +21 (4)                                                        | not reported                                         |                              | ✓                             | ✓                             |
| Denning, 2018 <sup>79</sup>     | UK                                | Vulvovaginal candidiasis                               | 1985 - 2016      | Yes                                       | 8 (2)                                                             | 2000-2013                                            | ✓                            |                               |                               |
| Di Gennaro, 2017 <sup>120</sup> | Mozambique                        | TB - MDR                                               | Inception - 2016 | Yes                                       | 50 (1)                                                            | 1997 - 2016                                          |                              | ✓                             |                               |
| Ding, 2020 <sup>114</sup>       | China                             | HBV                                                    | Inception - 2020 | Yes                                       | 10 (0)                                                            | 1995 - 2019                                          |                              | ✓                             |                               |
| Dong, 2020 <sup>94</sup>        | China                             | Cryptosporidium Infection                              | 1960 - 2018      | Yes                                       | 221 (unclear)                                                     | Unclear                                              | ✓                            | ✓                             |                               |
| Dugan, 2021 <sup>95</sup>       | USA                               | HCV                                                    | 2000 - 2018      | No                                        | 41 (unclear)                                                      | Unclear                                              | ✓                            |                               |                               |
| Eilami, 2019 <sup>104</sup>     | Iran                              | HIV/AIDS                                               | 2010 - 2017      | Yes                                       | 54 (unclear)                                                      | 2010-2017                                            | ✓                            |                               |                               |
| Fakoya, 2015 <sup>71</sup>      | UK                                | HIV                                                    | 2002- 2014       | No                                        | 27 (9)                                                            | 2003-2014                                            | ✓                            |                               |                               |
| Falagas, 2008 <sup>59</sup>     | Greece                            | Vaccination                                            | Not reported     | No                                        | 39 (1)                                                            | 1979-2005                                            | ✓                            | ✓                             |                               |
| Falla, 2018 <sup>20</sup>       | Netherlands                       | Chronic HCV                                            | 2000-2015        | No                                        | Part 1: 18 (unclear)<br>Part 2: 56 (1)                            |                                                      |                              |                               | ✓                             |
| Faria, 2021 <sup>96</sup>       | Brazil                            | Vaccination                                            | Inception-2020   | Yes                                       | 31 (0)                                                            | 2001 -2020                                           | ✓                            | ✓                             |                               |
| Fauroux, 2017 <sup>105</sup>    | Spain                             | Respiratory Syncytial Virus                            | 1995 - 2015      | No                                        | 74 (8)                                                            | Unclear                                              | ✓                            | ✓                             |                               |
| Faustini, 2005 <sup>21</sup>    | Italy                             | TB (MDR)                                               | 1993-2003        | Yes                                       | 29 (3)                                                            | 1995-2005                                            | ✓                            |                               | ✓                             |
| Fernández, 2015 <sup>60</sup>   | Denmark                           | Vaccination: HPV                                       | not reported     | No                                        | 23(8)                                                             | 2008-2014                                            | ✓                            | ✓                             |                               |
| Fisher, 2013 <sup>61</sup>      | UK                                | Vaccination: HPV                                       | Inception- 2012  | Yes                                       | 27(1)                                                             | 2008-2012                                            | ✓                            | ✓                             |                               |
| Forshaw, 2017 <sup>117</sup>    | UK                                | Vaccination                                            | 1990 - 2016      | Yes                                       | 37(0)                                                             | 1990- 2015                                           | ✓                            | ✓                             |                               |
| Fournet, 2018 <sup>8</sup>      | Netherlands                       | Vaccination                                            | 1950- 2013       | No                                        | 48/15 (at least 1)                                                | not reported                                         | ✓                            |                               | ✓                             |
| Ghiasvand, 2020 <sup>80</sup>   | Iran                              | HIV/AIDS                                               | Inception - 2017 | Yes                                       | 19 (0)                                                            | 2005 - 2017                                          | ✓                            | ✓                             |                               |
| Gorjana, 2017 <sup>62</sup>     | Australia                         | HPV Vaccination                                        | Unclear - 2015   | No                                        | 18 (1)                                                            | 2010 - 2015                                          | ✓                            |                               |                               |

| Study ID<br>(Author, Year)                 | Corresponding<br>Author's Country | Infectious diseases           | Search period    | Includes<br>meta-<br>analysis<br>(Yes/No) | Number of studies<br>included ( <i>Number of<br/>UK studies</i> ) | Publication<br>year range for<br>included<br>studies | Protected<br>characteristics | Socioeconomic<br>inequalities | Inclusion<br>health<br>groups |
|--------------------------------------------|-----------------------------------|-------------------------------|------------------|-------------------------------------------|-------------------------------------------------------------------|------------------------------------------------------|------------------------------|-------------------------------|-------------------------------|
| Greenaway, 2015 <sup>22</sup>              | Canada                            | HCV                           | not reported     | Yes                                       | 50(0)                                                             | 1990-2013                                            | ✓                            | ✓                             | ✓                             |
| Hahne, 2013 <sup>24</sup>                  | The Netherlands                   | HBV and HCV                   | 2000 - 2009      | No                                        | 124 (9)                                                           | Unclear                                              | ✓                            |                               | ✓                             |
| Hermann, 2019 <sup>81</sup>                | Canada                            | Vaccination                   | 2000- 2017       | No                                        | 33 (15)                                                           | 2001-2016                                            | ✓                            |                               |                               |
| Jackson, 2021 <sup>38</sup>                | Ireland                           | Tuberculosis and MDR-TB       | Unclear - 2020   | Yes                                       | 32 (3)                                                            | 2010 - 2018                                          |                              |                               | ✓                             |
| Jain, 2017 <sup>25</sup>                   | UK                                | Vaccination                   | not reported     | Yes                                       | 35 (5)                                                            | 1997 and 2015                                        | ✓                            | ✓                             | ✓                             |
| Jin, 2020 <sup>72</sup>                    | Australia                         | HCV                           | 2000 - 2019      | Yes                                       | 194 (at least 14)                                                 | Unclear                                              |                              |                               | ✓                             |
| Kabapy, 2020 <sup>39</sup>                 | Egypt                             | HIV                           | 1982 - 2018      | Yes                                       | 231 (unclear)                                                     | Unclear                                              | ✓                            | ✓                             | ✓                             |
| Kawatsu, 2014 <sup>26</sup>                | Japan                             | TB                            | Not reported     | No                                        | 18 (1)                                                            | 1997 - 2012                                          | ✓                            | ✓                             | ✓                             |
| Kentikelenis, 2015 <sup>27</sup>           | UK                                | Various                       | 2007 - 2014      | No                                        | 21 (unclear)                                                      | not reported                                         |                              | ✓                             | ✓                             |
| Lafond, 2021 <sup>97</sup>                 | USA                               | Influenza-associated lower    | 1996–2016        | Yes                                       | 75 (Unclear)                                                      | 1996 - 2016                                          | ✓                            |                               |                               |
| Larson, 2014 <sup>115</sup>                | UK                                | Vaccination                   | unclear - 2012   | No                                        | 1164 (at least one)                                               | 2007–2012                                            |                              | ✓                             |                               |
| Leumi, 2020 <sup>56</sup>                  | Cameroon                          | Hepatitis B                   | 1990 - 2017      | Yes                                       | 358 (unclear)                                                     | Unclear                                              | ✓                            |                               | ✓                             |
| Leung, 2019 <sup>106</sup>                 | Australia                         | HIV, HBV, HCV                 | 2008 - 2017      | Yes                                       | 104(unclear)                                                      | not reported                                         | ✓                            |                               |                               |
| Li, P. 2020 <sup>82</sup>                  | Netherlands                       | HEV                           | inception - 2019 | Yes                                       | 419(7)                                                            | not reported                                         | ✓                            | ✓                             |                               |
| Lindsay, 2015 <sup>83</sup>                | Belgium                           | Norovirus disease             | 2003 - 2013      | No                                        | 39 (4)                                                            | not reported                                         | ✓                            |                               |                               |
| Lucyk, 2019 <sup>119</sup>                 | Canada                            | Vaccination- Influenza        | 2012 - 2017      | No                                        | 42 (1)                                                            | 2012- 2017                                           |                              | ✓                             |                               |
| Ly, 2021 <sup>51</sup>                     | France                            | Various                       | 1980 - 2020      | No                                        | 81 (4)                                                            | Unclear                                              | ✓                            | ✓                             | ✓                             |
| Macina, 2021 <sup>98</sup>                 | France                            | Bordetella pertussis          | 1990 - 2019      | No                                        | 88 (7)                                                            | Unclear                                              | ✓                            |                               |                               |
| Malerba, 2015 <sup>63</sup>                | Italy                             | Vaccination                   | 2000 - 2014      | No                                        | 11 (1)                                                            | 2003-2014                                            | ✓                            | ✓                             |                               |
| McBride, 2021 <sup>40</sup>                | Canada                            | HIV/STI                       | 2009 - 2019      | No                                        | 29 (unclear)                                                      | Not reported                                         | ✓                            |                               | ✓                             |
| Millett, 2012 <sup>64</sup>                | USA                               | HIV disease                   | 1981 - 2011      | Yes                                       | 194 (13)                                                          | 1981-2011                                            | ✓                            | ✓                             |                               |
| Mipatrini, 2017 <sup>28</sup>              | Italy                             | Vaccination                   | 2005-2016        | No                                        | 58 (7)                                                            | not reported                                         |                              |                               | ✓                             |
| Mirzadeh, 2021 <sup>99</sup>               | Iran                              | Trichomonas vaginalis         | 1985 - 2020.     | Yes                                       | 85 (2)                                                            | 1985 - 2020                                          | ✓                            |                               |                               |
| Morais, 2017 <sup>29</sup>                 | Portugal                          | <i>Helicobacter pylori</i>    | inception - 2015 | No                                        | 28 (unclear)                                                      | 1988-2014                                            |                              |                               | ✓                             |
| Nagata, 2013 <sup>65</sup>                 | Switzerland                       | vaccination- Influenza        | 1980 - 2011      | No                                        | 80 (7)                                                            | not reported                                         | ✓                            | ✓                             |                               |
| Najafizada, 2020 <sup>121</sup>            | Canada                            | MDR-TB                        | 1998-2018        | No                                        | 15(4)                                                             | Not reported                                         |                              | ✓                             |                               |
| Nava-Aguilera, 2009 <sup>49</sup>          | Mexico                            | TB                            | unclear - 2005   | Yes                                       | 30 (1)                                                            | 1994 - 2008                                          | ✓                            | ✓                             | ✓                             |
| Nellums, 2018b <sup>42</sup>               | UK                                | AMR                           | 2000- 2017       | Yes                                       | 23 (0)                                                            | 2006-2016                                            |                              |                               | ✓                             |
| Newman, 2015 <sup>111</sup>                | USA                               | Foodborne infectious diseases | 1980 - 2013      | No                                        | 16 (3)                                                            | not reported                                         | ✓                            | ✓                             |                               |
| Nourollahpour Shiadeh, 2020 <sup>110</sup> | Iran                              | Toxoplasmosis                 | Inception -2020  | Yes                                       | 14 (0)                                                            | 2001- 2019                                           | ✓                            |                               |                               |
| Offer, 2015 <sup>66</sup>                  | UK                                | TB                            | 1990 - unclear   | No                                        | 18 (18)                                                           | 1999-2013                                            | ✓                            | ✓                             |                               |
| Okoli, 2020 <sup>30</sup>                  | Canada                            | Influenza vaccination         | Unclear - 2020   | Yes                                       | 34 (1)                                                            | 2004 - 2019                                          | ✓                            | ✓                             | ✓                             |
| Okoli, 2021 <sup>69</sup>                  | Canada                            | Influenza vaccination         | 2000 - 2020      | Yes                                       | 36 (2)                                                            | 2010-2020                                            | ✓                            | ✓                             |                               |
| Oldenburg, 2014 <sup>73</sup>              | USA                               | HIV                           | 2004 - 2013      | Yes                                       | 88 (1)                                                            | not reported                                         | ✓                            |                               | ✓                             |
| Oldenburg, 2015 <sup>52</sup>              | USA                               | HIV                           | 2004 - 2013,     | Yes                                       | 33 (0)                                                            | 2004-2013                                            |                              |                               | ✓                             |
| Operario, 2008 <sup>53</sup>               | UK                                | HIV                           | 1980-2007        | Yes                                       | 25 (0)                                                            | 1988- 2006.                                          | ✓                            |                               | ✓                             |
| Pega 2021 <sup>41</sup>                    | Switzerland,                      | HIV                           | 2010- 2020       | Yes                                       | 19(1)                                                             | 2010-2019                                            |                              |                               | ✓                             |

| Study ID<br>(Author, Year)                 | Corresponding<br>Author's Country | Infectious diseases        | Search period    | Includes<br>meta-<br>analysis<br>(Yes/No) | Number of studies<br>included ( <i>Number of<br/>UK studies</i> ) | Publication<br>year range for<br>included<br>studies | Protected<br>characteristics | Socioeconomic<br>inequalities | Inclusion<br>health<br>groups |
|--------------------------------------------|-----------------------------------|----------------------------|------------------|-------------------------------------------|-------------------------------------------------------------------|------------------------------------------------------|------------------------------|-------------------------------|-------------------------------|
| Platt, 2013a <sup>31</sup>                 | UK                                | HIV, STIs                  | Not reported     | No                                        | 26 (1)                                                            | Not reported                                         |                              |                               | ✓                             |
| Platt, 2013b <sup>32</sup>                 | UK                                | HIV, STIs                  | 2005 - 2011      | No                                        | 73 (5)                                                            | Not reported                                         |                              |                               | ✓                             |
| Possenti, 2016 <sup>84</sup>               | Italy                             | Cystic Echinococcosis      | not reported     | Yes                                       | 37(0)                                                             | 1964-2014                                            | ✓                            | ✓                             |                               |
| Prost, 2007 <sup>33</sup>                  | UK                                | HIV                        | Unknown - 2005   | No                                        | 138 (unclear)                                                     | 1996 -2005                                           | ✓                            |                               | ✓                             |
| Pulver, 2016 <sup>107</sup>                | Canada                            | Vaccination                | 1980 - 2014      | No                                        | 12 (1)                                                            | 1993 - 2013                                          | ✓                            |                               | ✓                             |
| Richterman, 2018 <sup>85</sup>             | USA                               | Cholera                    | not reported     | Yes                                       | 110 (0)                                                           | 1974-2017                                            | ✓                            | ✓                             |                               |
| Rodrigo, 2010 <sup>112</sup>               | Sri Lanka                         | HIV                        | 1999 -2009       | No                                        | 98 (unclear)                                                      | not reported                                         |                              | ✓                             |                               |
| Roller-Wirnsberger,<br>2021 <sup>100</sup> | Austria                           | Influenza vaccination      | 2012- 2019       | No                                        | 44 (at least 1)                                                   | 2012-2018                                            | ✓                            | ✓                             |                               |
| Rossi, 2012 <sup>34</sup>                  | Canada                            | HBV                        | Inception - 2011 | Yes                                       | 110 (2)                                                           | 1977 - 2011                                          |                              |                               | ✓                             |
| Rostami, 2019a <sup>87</sup>               | Iran                              | Toxocariasis               | 1980 - 2019      | Yes                                       | 250 (2)                                                           | 1980 -2019                                           | ✓                            | ✓                             |                               |
| Rostami, 2019b <sup>86</sup>               | Iran                              | Acute Toxoplasma infection | 1988 - 2018      | Yes                                       | 217 (3)                                                           | 1988 - 2018                                          | ✓                            |                               |                               |
| Rostami, 2021 <sup>101</sup>               | Iran                              | Toxoplasmosis              | 1980-2020        | Yes                                       | 150 (2)                                                           | 1987-2020                                            | ✓                            | ✓                             |                               |
| Salgado-Barreira,<br>2014 <sup>122</sup>   | Spain                             | HIV                        | unclear -2012    | No                                        | 24 (1)                                                            | 1983- 2010                                           |                              | ✓                             |                               |
| Sandgren, 2014 <sup>23</sup>               | Sweden                            | TB                         | 1990- 2012       | Yes                                       | 15 (1)                                                            | not reported                                         |                              |                               | ✓                             |
| Schepisi, 2018 <sup>88</sup>               | Italy                             | TB                         | unclear - 2017   | Yes                                       | 74 (13)                                                           | 1950-2017                                            | ✓                            |                               |                               |
| Schierhout, 2020 <sup>89</sup>             | Australia                         | HTLV-1                     | 1910 - 2018      | Yes                                       | 39 (0)                                                            | 1991 - 2018                                          | ✓                            |                               |                               |
| Song, 2021 <sup>102</sup>                  | China                             | Drug resistant TB (MDR-TB) | 2000-2020        | Yes                                       | 37 (2 at least)                                                   | 2000-2019                                            | ✓                            |                               |                               |
| Spyromitrou-Xioufi,<br>2020 <sup>90</sup>  | Greece                            | Meningococcal Infection    | 2008 - 2018      | Yes                                       | 6 (0)                                                             | 1999-2017                                            | ✓                            | ✓                             |                               |
| Stockdale, 2020 <sup>54</sup>              | UK                                | HDV                        | 1998 - 2019      | Yes                                       | 282 (at least 1)                                                  | not reported                                         |                              |                               | ✓                             |
| Striffler, 2015 <sup>91</sup>              | Canada                            | Meningococcal Infection    | inception - 2013 | No                                        | 17 (6)                                                            | 1982-2012                                            | ✓                            |                               |                               |
| Suhrcke, 2011 <sup>35</sup>                | UK                                | Various                    | 1947 - 2010      | No                                        | 37 (2)                                                            | not reported                                         |                              | ✓                             | ✓                             |
| Sultana, 2021 <sup>103</sup>               | Bangladesh                        | HIV and MDR-TB             | 2010 - 2020      | Yes                                       | 54 (0)                                                            | 2010 - 2020                                          | ✓                            |                               |                               |
| Tabacchi, 2016 <sup>67</sup>               | Italy                             | Vaccination- MMR           | not reported     | Yes                                       | 45 (19)                                                           | 2000-2014                                            | ✓                            | ✓                             |                               |
| Tauli, 2016 <sup>36</sup>                  | Brazil                            | Vaccination                | 1992- 2014       | No                                        | 23(0)                                                             | not reported                                         | ✓                            | ✓                             | ✓                             |
| Tavares, 2017 <sup>37</sup>                | Portugal                          | HIV-TB                     | 2000 - 2016      | No                                        | 27 (2)                                                            | 2003 - 2016                                          |                              |                               | ✓                             |
| Tollefson, 2013 <sup>45</sup>              | USA                               | TB                         | 1990 – 2011      | No                                        | 91 (0)                                                            | 1990 - 2012                                          |                              |                               | ✓                             |
| Van Gerwen, 2020 <sup>108</sup>            | USA                               | STI/HIV                    | 1968 - 2018      | Yes                                       | 25 (0)                                                            | not reported                                         | ✓                            |                               |                               |
| Vet, 2015 <sup>55</sup>                    | The Netherlands                   | Vaccination                | Inception-2014   | No                                        | 18 (0)                                                            | not reported                                         | ✓                            | ✓                             | ✓                             |
| Vukovic,2019 <sup>123</sup>                | Italy                             | Influenza vaccination      | Unknown - 2017   | No                                        | 12 (6)                                                            | 2004 - 2017                                          |                              | ✓                             |                               |
| Wayal, 2018 <sup>68</sup>                  | UK                                | STI                        | Unclear - 2016   | No                                        | 15 (15)                                                           | 2000 - 2017                                          | ✓                            |                               |                               |
| Whelan, 2021 <sup>109</sup>                | The Netherlands                   | Gonorrhoea                 | 2010 - 2019      | No                                        | 174 (1)                                                           | Unclear                                              | ✓                            |                               |                               |
| Wu, 2021 <sup>57</sup>                     | China                             | HPV                        | 1990-2019        | Yes                                       | 107 (0)                                                           | 1989-2019                                            | ✓                            |                               | ✓                             |
| Yu, 2020 <sup>43</sup>                     | USA                               | HIV/STI                    | Unclear - 2019   | No                                        | 21 (0)                                                            | 2008 -2017                                           |                              |                               | ✓                             |
| Zamani, 2018 <sup>92</sup>                 | Iran                              | <i>Helicobacter pylori</i> | 2000 - 2017      | Yes                                       | 183 (2)                                                           | not reported                                         | ✓                            |                               |                               |

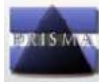

## PRISMA 2020 Checklist

| Section and Topic             | Item # | Checklist item                                                                                                                                                                                                                                                                                       | Location where item is reported          |
|-------------------------------|--------|------------------------------------------------------------------------------------------------------------------------------------------------------------------------------------------------------------------------------------------------------------------------------------------------------|------------------------------------------|
| <b>TITLE</b>                  |        |                                                                                                                                                                                                                                                                                                      |                                          |
| Title                         | 1      | Identify the report as a systematic review.                                                                                                                                                                                                                                                          | Page 1, Page 4                           |
| <b>ABSTRACT</b>               |        |                                                                                                                                                                                                                                                                                                      |                                          |
| Abstract                      | 2      | See the PRISMA 2020 for Abstracts checklist.                                                                                                                                                                                                                                                         | Page 2                                   |
| <b>INTRODUCTION</b>           |        |                                                                                                                                                                                                                                                                                                      |                                          |
| Rationale                     | 3      | Describe the rationale for the review in the context of existing knowledge.                                                                                                                                                                                                                          | Page 3 - 4                               |
| Objectives                    | 4      | Provide an explicit statement of the objective(s) or question(s) the review addresses.                                                                                                                                                                                                               | Page 4                                   |
| <b>METHODS</b>                |        |                                                                                                                                                                                                                                                                                                      |                                          |
| Eligibility criteria          | 5      | Specify the inclusion and exclusion criteria for the review and how studies were grouped for the syntheses.                                                                                                                                                                                          | Page 6, Table 1                          |
| Information sources           | 6      | Specify all databases, registers, websites, organisations, reference lists and other sources searched or consulted to identify studies. Specify the date when each source was last searched or consulted.                                                                                            | Page 5                                   |
| Search strategy               | 7      | Present the full search strategies for all databases, registers and websites, including any filters and limits used.                                                                                                                                                                                 | Page 5<br>online supplemental appendix 1 |
| Selection process             | 8      | Specify the methods used to decide whether a study met the inclusion criteria of the review, including how many reviewers screened each record and each report retrieved, whether they worked independently, and if applicable, details of automation tools used in the process.                     | Page 5                                   |
| Data collection process       | 9      | Specify the methods used to collect data from reports, including how many reviewers collected data from each report, whether they worked independently, any processes for obtaining or confirming data from study investigators, and if applicable, details of automation tools used in the process. | Page 6-7                                 |
| Data items                    | 10a    | List and define all outcomes for which data were sought. Specify whether all results that were compatible with each outcome domain in each study were sought (e.g. for all measures, time points, analyses), and if not, the methods used to decide which results to collect.                        | Page 6-7                                 |
|                               | 10b    | List and define all other variables for which data were sought (e.g. participant and intervention characteristics, funding sources). Describe any assumptions made about any missing or unclear information.                                                                                         | Page 6-7                                 |
| Study risk of bias assessment | 11     | Specify the methods used to assess risk of bias in the included studies, including details of the tool(s) used, how many reviewers assessed each study and whether they worked independently, and if applicable, details of automation tools used in the process.                                    | Page 7                                   |
| Effect measures               | 12     | Specify for each outcome the effect measure(s) (e.g. risk ratio, mean difference) used in the synthesis or presentation of results.                                                                                                                                                                  |                                          |
| Synthesis methods             | 13a    | Describe the processes used to decide which studies were eligible for each synthesis (e.g. tabulating the study intervention characteristics and comparing against the planned groups for each synthesis (item #5)).                                                                                 | Page 7                                   |
|                               | 13b    | Describe any methods required to prepare the data for presentation or synthesis, such as handling of missing summary statistics, or data conversions.                                                                                                                                                | Page 7                                   |
|                               | 13c    | Describe any methods used to tabulate or visually display results of individual studies and syntheses.                                                                                                                                                                                               | Page 7                                   |
|                               | 13d    | Describe any methods used to synthesize results and provide a rationale for the choice(s). If meta-analysis was performed, describe the model(s), method(s) to identify the presence and extent of statistical heterogeneity, and software package(s) used.                                          | Page 7                                   |
|                               | 13e    | Describe any methods used to explore possible causes of heterogeneity among study results (e.g. subgroup analysis, meta-regression).                                                                                                                                                                 | N/A                                      |

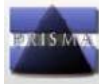

## PRISMA 2020 Checklist

| Section and Topic             | Item # | Checklist item                                                                                                                                                                                                                                                                       | Location where item is reported                     |
|-------------------------------|--------|--------------------------------------------------------------------------------------------------------------------------------------------------------------------------------------------------------------------------------------------------------------------------------------|-----------------------------------------------------|
|                               | 13f    | Describe any sensitivity analyses conducted to assess robustness of the synthesized results.                                                                                                                                                                                         | N/A                                                 |
| Reporting bias assessment     | 14     | Describe any methods used to assess risk of bias due to missing results in a synthesis (arising from reporting biases).                                                                                                                                                              | N/A                                                 |
| Certainty assessment          | 15     | Describe any methods used to assess certainty (or confidence) in the body of evidence for an outcome.                                                                                                                                                                                | N/A                                                 |
| <b>RESULTS</b>                |        |                                                                                                                                                                                                                                                                                      |                                                     |
| Study selection               | 16a    | Describe the results of the search and selection process, from the number of records identified in the search to the number of studies included in the review, ideally using a flow diagram.                                                                                         | Page 7, Figure 1                                    |
|                               | 16b    | Cite studies that might appear to meet the inclusion criteria, but which were excluded, and explain why they were excluded.                                                                                                                                                          | Page 7                                              |
| Study characteristics         | 17     | Cite each included study and present its characteristics.                                                                                                                                                                                                                            | Table 2, Page 11-16                                 |
| Risk of bias in studies       | 18     | Present assessments of risk of bias for each included study.                                                                                                                                                                                                                         | Page 11, Figure 3, online supplementary appendix 4  |
| Results of individual studies | 19     | For all outcomes, present, for each study: (a) summary statistics for each group (where appropriate) and (b) an effect estimate and its precision (e.g. confidence/credible interval), ideally using structured tables or plots.                                                     | Table 2, Page 11-16, online supplemental appendix 2 |
| Results of syntheses          | 20a    | For each synthesis, briefly summarise the characteristics and risk of bias among contributing studies.                                                                                                                                                                               | Page 11-16                                          |
|                               | 20b    | Present results of all statistical syntheses conducted. If meta-analysis was done, present for each the summary estimate and its precision (e.g. confidence/credible interval) and measures of statistical heterogeneity. If comparing groups, describe the direction of the effect. | N/A                                                 |
|                               | 20c    | Present results of all investigations of possible causes of heterogeneity among study results.                                                                                                                                                                                       | N/A                                                 |
|                               | 20d    | Present results of all sensitivity analyses conducted to assess the robustness of the synthesized results.                                                                                                                                                                           | N/A                                                 |
| Reporting biases              | 21     | Present assessments of risk of bias due to missing results (arising from reporting biases) for each synthesis assessed.                                                                                                                                                              | N/A                                                 |
| Certainty of evidence         | 22     | Present assessments of certainty (or confidence) in the body of evidence for each outcome assessed.                                                                                                                                                                                  | N/A                                                 |
| <b>DISCUSSION</b>             |        |                                                                                                                                                                                                                                                                                      |                                                     |
| Discussion                    | 23a    | Provide a general interpretation of the results in the context of other evidence.                                                                                                                                                                                                    | Page 16-17                                          |
|                               | 23b    | Discuss any limitations of the evidence included in the review.                                                                                                                                                                                                                      | Page 17-18                                          |
|                               | 23c    | Discuss any limitations of the review processes used.                                                                                                                                                                                                                                | Page 17-18                                          |
|                               | 23d    | Discuss implications of the results for practice, policy, and future research.                                                                                                                                                                                                       | Page 16-18                                          |
| <b>OTHER INFORMATION</b>      |        |                                                                                                                                                                                                                                                                                      |                                                     |
| Registration and protocol     | 24a    | Provide registration information for the review, including register name and registration number, or state that the review was not registered.                                                                                                                                       | Page 5                                              |
|                               | 24b    | Indicate where the review protocol can be accessed, or state that a protocol was not prepared.                                                                                                                                                                                       | Page 5                                              |



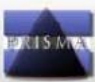

# PRISMA 2020 Checklist

1  
2  
3  
4  
5  
6  
7  
8  
9  
10  
11  
12  
13  
14  
15  
16  
17  
18  
19  
20  
21  
22  
23  
24  
25  
26  
27  
28  
29  
30  
31  
32  
33  
34  
35  
36  
37  
38  
39  
40  
41  
42  
43  
44  
45  
46  
47

| Section and Topic                              | Item # | Checklist item                                                                                                                                                                                                                             | Location where item is reported |
|------------------------------------------------|--------|--------------------------------------------------------------------------------------------------------------------------------------------------------------------------------------------------------------------------------------------|---------------------------------|
|                                                | 24c    | Describe and explain any amendments to information provided at registration or in the protocol.                                                                                                                                            | -                               |
| Support                                        | 25     | Describe sources of financial or non-financial support for the review, and the role of the funders or sponsors in the review.                                                                                                              | Page 18                         |
| Competing interests                            | 26     | Declare any competing interests of review authors.                                                                                                                                                                                         | Page 18                         |
| Availability of data, code and other materials | 27     | Report which of the following are publicly available and where they can be found: template data collection forms; data extracted from included studies; data used for all analyses; analytic code; any other materials used in the review. | Online supplemental material    |

From: Page MJ, McKenzie JE, Bossuyt PM, Boutron I, Hoffmann TC, Mulrow CD, et al. The PRISMA 2020 statement: an updated guideline for reporting systematic reviews. *BMJ* 2021;372:n71. doi: 10.1136/bmj.n71  
 For more information, visit: <http://www.prisma-statement.org/>

# BMJ Open

## Health Inequalities in Infectious Diseases: A Systematic Overview of Reviews

|                                 |                                                                                                                                                                                                                                                                                                                                                                                                                                                                                                                                                                                                                                                                                                                                                                                                                                                                    |
|---------------------------------|--------------------------------------------------------------------------------------------------------------------------------------------------------------------------------------------------------------------------------------------------------------------------------------------------------------------------------------------------------------------------------------------------------------------------------------------------------------------------------------------------------------------------------------------------------------------------------------------------------------------------------------------------------------------------------------------------------------------------------------------------------------------------------------------------------------------------------------------------------------------|
| Journal:                        | <i>BMJ Open</i>                                                                                                                                                                                                                                                                                                                                                                                                                                                                                                                                                                                                                                                                                                                                                                                                                                                    |
| Manuscript ID                   | bmjopen-2022-067429.R1                                                                                                                                                                                                                                                                                                                                                                                                                                                                                                                                                                                                                                                                                                                                                                                                                                             |
| Article Type:                   | Original research                                                                                                                                                                                                                                                                                                                                                                                                                                                                                                                                                                                                                                                                                                                                                                                                                                                  |
| Date Submitted by the Author:   | 11-Jan-2023                                                                                                                                                                                                                                                                                                                                                                                                                                                                                                                                                                                                                                                                                                                                                                                                                                                        |
| Complete List of Authors:       | Ayorinde, Abimbola; University of Warwick, Warwick Medical School<br>Ghosh, Iman; University of Warwick, Warwick Medical School<br>Ali, Ifra; University of Warwick, Warwick Medical School<br>Zahair, Iram; University of Liverpool<br>Olaewaju, Olajumoke; Johns Hopkins University Bloomberg School of Public Health, Department of Health, Behavior and Society<br>Singh, Megha; University of Warwick, Warwick Medical School<br>Meehan, Edward; Monash University<br>Anjorin, Seun; University of Oxford Nuffield Department of Population Health<br>Rotheram, Suzanne; University of Liverpool, Institute of Population Health<br>Barr, Ben ; University of Liverpool, Public Health and Policy<br>McCarthy, Noel; Trinity College Dublin, School of Medicine<br>Oyebode, Oyinlola; Queen Mary University of London, Wolfson Institute of Population Health |
| <b>Primary Subject Heading</b>: | Infectious diseases                                                                                                                                                                                                                                                                                                                                                                                                                                                                                                                                                                                                                                                                                                                                                                                                                                                |
| Secondary Subject Heading:      | Epidemiology, Public health                                                                                                                                                                                                                                                                                                                                                                                                                                                                                                                                                                                                                                                                                                                                                                                                                                        |
| Keywords:                       | Public health < INFECTIOUS DISEASES, INFECTIOUS DISEASES, Epidemiology < INFECTIOUS DISEASES                                                                                                                                                                                                                                                                                                                                                                                                                                                                                                                                                                                                                                                                                                                                                                       |
|                                 |                                                                                                                                                                                                                                                                                                                                                                                                                                                                                                                                                                                                                                                                                                                                                                                                                                                                    |

SCHOLARONE™  
Manuscripts



I, the Submitting Author has the right to grant and does grant on behalf of all authors of the Work (as defined in the below author licence), an exclusive licence and/or a non-exclusive licence for contributions from authors who are: i) UK Crown employees; ii) where BMJ has agreed a CC-BY licence shall apply, and/or iii) in accordance with the terms applicable for US Federal Government officers or employees acting as part of their official duties; on a worldwide, perpetual, irrevocable, royalty-free basis to BMJ Publishing Group Ltd ("BMJ") its licensees and where the relevant Journal is co-owned by BMJ to the co-owners of the Journal, to publish the Work in this journal and any other BMJ products and to exploit all rights, as set out in our [licence](#).

The Submitting Author accepts and understands that any supply made under these terms is made by BMJ to the Submitting Author unless you are acting as an employee on behalf of your employer or a postgraduate student of an affiliated institution which is paying any applicable article publishing charge ("APC") for Open Access articles. Where the Submitting Author wishes to make the Work available on an Open Access basis (and intends to pay the relevant APC), the terms of reuse of such Open Access shall be governed by a Creative Commons licence – details of these licences and which [Creative Commons](#) licence will apply to this Work are set out in our licence referred to above.

Other than as permitted in any relevant BMJ Author's Self Archiving Policies, I confirm this Work has not been accepted for publication elsewhere, is not being considered for publication elsewhere and does not duplicate material already published. I confirm all authors consent to publication of this Work and authorise the granting of this licence.

# Health Inequalities in Infectious Diseases: A Systematic Overview of Reviews

Abimbola A Ayorinde<sup>1\*</sup>, Iman Ghosh<sup>1</sup>, Ifra Ali<sup>1</sup>, Iram Zahair<sup>2</sup>, Olajumoke Olarewaju<sup>3</sup>, Megha Singh<sup>1</sup>, Edward Meehan<sup>4</sup>, Seun S Anjorin<sup>1</sup>, Suzanne Rotheram<sup>2</sup>, Benjamin Barr<sup>2</sup>, Noel McCarthy<sup>5</sup>, Oyinlola Oyebo<sup>6</sup>

<sup>1</sup>Warwick Medical School, University of Warwick, Coventry, United Kingdom

<sup>2</sup>Institute of Population Health, University of Liverpool, Liverpool, United Kingdom

<sup>3</sup>Bloomberg School of Public Health, John Hopkins University, Maryland, United States of America

<sup>4</sup>Monash University, Melbourne, Victoria, Australia

<sup>5</sup> Nuffield Department of Population Health, University of Oxford, Oxford, United Kingdom

<sup>6</sup>School of Medicine, Trinity College Dublin, Ireland

<sup>7</sup>Wolfson Institute of Population Health, Queen Mary University of London, United Kingdom

\*Corresponding Author

Email: [a.ayorinde.1@warwick.ac.uk](mailto:a.ayorinde.1@warwick.ac.uk)

Warwick Medical School, University of Warwick, Coventry, United Kingdom

**Word count:** 4173

**Keywords:** Health inequalities, infectious diseases, protected characteristics, socio-economic, inclusion health

## ABSTRACT:

**Objectives:** The aim of this systematic overview of reviews was to synthesise available evidence on inequalities in infectious disease based on three dimensions of inequalities; inclusion health groups, protected characteristics, and socioeconomic inequalities.

**Methods:** We searched Medline, Embase, Web of Science and Open Grey databases in November 2021. We included reviews published from the year 2000 which examined inequalities in the incidence, prevalence or consequences infectious diseases based on the dimensions of interest. Our search focused on tuberculosis, human immunodeficiency virus, sexually transmitted infections, Hepatitis C, vaccination, and antimicrobial resistance. However, we also included eligible reviews of any other infectious diseases. We appraised the quality of reviews using the Assessment of Multiple Systematic Reviews version 2 (AMSTAR2) checklist. We conducted a narrative data synthesis.

**Results:** We included 108 reviews in our synthesis covering all the dimensions of inequalities for most of the infectious disease topics of interest, however the quality and volume of review evidence and consistency of their findings varied. The existing literature reviews provides strong evidence that people of inclusion health groups and lower socio-economic status are consistently at higher risk of infectious diseases, antimicrobial resistance, and incomplete/delayed vaccination. In the protected characteristics dimension, ethnicity and sexual orientation are important factors contributing to inequalities across the various infectious disease topics included in this overview of reviews.

**Conclusion:** We identified many reviews that provide evidence of various types of health inequalities in different infectious diseases, vaccination, and antimicrobial resistance. We also highlight areas where reviews may be lacking. The commonalities in the associations and their directions suggest it might be worth targeting interventions for some high risk-groups that may have benefits across multiple infectious disease outcomes rather than operating purely in infectious disease siloes.

## STRENGTHS AND LIMITATIONS OF THIS STUDY

- The protocol used for this systematic overview of reviews was pre-designed and registered in advance.
- We had wide inclusion criteria including various dimensions of inequalities across several key infectious diseases, providing a broad overview of inequalities in infectious diseases, especially those relevant to high-income countries.
- This overview focussed on tuberculosis, human immunodeficiency virus, sexually transmitted infections, Hepatitis C, vaccination, and antimicrobial resistance, however, we also included evidence from other infectious diseases except COVID-19.
- We used AMSTAR2 to assess the methodological quality of each of the included reviews, however, some of the included reviews are not systematic reviews for which AMSTAR2 was designed.
- Because this is an overview of reviews, we are unable to incorporate evidence within primary studies that have not been synthesised in reviews, which means there may be evidence we are missing.

## INTRODUCTION

The World Health Organisation regards experiencing the highest possible standard of health as a fundamental human right of every individual regardless of personal or social circumstances [1]. Nevertheless, avoidable inequalities exist in the prevalence of diseases and illnesses, general health status, and access to health care between various social groups [2]. A complex interaction between structural (for example, income and wealth distribution) and individual-level (for example, health behaviours and living conditions) determinants of health contributes to the increased vulnerability to poorer health among particular social groups [3, 4].

Infectious diseases pose a significant health burden with substantial health inequalities globally [5]. In the United Kingdom (UK), infectious diseases constitute 7% of deaths alongside 4% of lost life years [6]. The economic burden of infectious diseases in the UK is estimated to be around £30 billion per year [6]. Although infectious diseases impose substantial, negative health and economic consequences within populations, many infectious diseases are vaccine-preventable and avoidable through adequate control measures [7]. However, some groups remain under vaccinated [8] and other control measures may be difficult or impossible to implement for some, depending on circumstances [9]. Traditionally, policy makers often target infectious diseases individually, but it is known that specific groups are often at higher risks regardless of specific infectious diseases [10-14]. In efforts to tackle the observed disparities and to reduce the burden of infectious diseases, a strategic approach that tackles infectious diseases among high-risk groups is required [15]. To inform the development of needs-tailored public health policies and initiatives to achieve this goal, a comprehensive synthesis of evidence is required, highlighting the inequalities in infectious diseases according to varying personal and social characteristics.

This project was commissioned by Public Health England (PHE) to gain an overview of the available evidence on health inequalities relating to key infectious disease topics in the UK from a population perspective. PHE had specific interest in three dimensions of inequalities; inclusion health groups (socially excluded and vulnerable populations), protected characteristics, and socioeconomic inequalities. The infectious disease topics of interest were TB, HIV, STIs, HCV, vaccination, and antimicrobial resistance (AMR). Therefore, the aim of this systematic overview of reviews was to describe the existing literature, relevant to the UK, relating to inequalities in the prevalence/incidence of key infectious disease topics as specified by PHE.

## METHODS

We conducted a systematic overview of reviews, pre-registered in PROSPERO, an international prospective register of systematic reviews (2020 CRD42020220203 [https://www.crd.york.ac.uk/prospERO/display\\_record.php?ID=CRD42020220203](https://www.crd.york.ac.uk/prospERO/display_record.php?ID=CRD42020220203)).

### Patient and public involvement

This study had no direct patient or public engagement.

### Search strategy and study selection

We developed a search strategy using synonyms and MeSH terms for inequalities, inclusion health groups, protected characteristics and socioeconomic factors which were combined with synonyms and MeSH terms for infectious diseases and synonyms for reviews (online supplemental file 1). We searched electronic databases from inception to November 2021; Medline, Embase, Web of Science and to identify relevant grey literature we searched Open Grey database (<http://www.opengrey.eu/>) and contacted experts in our network.

We exported citations into Endnote, removed duplicates and then exported them into a web-tool, Rayyan (<https://www.rayyan.ai/>) to facilitate citation screening. Articles were screened against pre-defined eligibility criteria (Table 1). Titles and abstracts were screened by a single reviewer and 10% were double screened by a second reviewer. Full texts of the potentially relevant articles were obtained and screened independently by two reviewers. Discrepancies were resolved by discussion.



Table 1: Eligibility Criteria

| Inclusion Criteria                                                                                                                                                                                                                                                                                                                                                                                                                                                                                                                                                                                                                                                                                                                                                                                                                                                                                                                                                                                                                                                                                                                                                                                                                                                                                          | Exclusion Criteria                                                                                                                                                                                                                                                                                                                                                                                                                                                                                                                                                                               |
|-------------------------------------------------------------------------------------------------------------------------------------------------------------------------------------------------------------------------------------------------------------------------------------------------------------------------------------------------------------------------------------------------------------------------------------------------------------------------------------------------------------------------------------------------------------------------------------------------------------------------------------------------------------------------------------------------------------------------------------------------------------------------------------------------------------------------------------------------------------------------------------------------------------------------------------------------------------------------------------------------------------------------------------------------------------------------------------------------------------------------------------------------------------------------------------------------------------------------------------------------------------------------------------------------------------|--------------------------------------------------------------------------------------------------------------------------------------------------------------------------------------------------------------------------------------------------------------------------------------------------------------------------------------------------------------------------------------------------------------------------------------------------------------------------------------------------------------------------------------------------------------------------------------------------|
| <p><i>Population:</i> Review including studies from the UK population or other high-income countries.</p> <p><i>Exposure:</i></p> <ul style="list-style-type: none"> <li>• Socioeconomic status: this includes education, income, occupation, social class, and deprivation measured at individual or aggregated level.</li> <li>• Protected characteristics: age, disability, gender reassignment, marriage and civil partnership, pregnancy and maternity, race, religion or belief, sex, and sexual orientation.</li> <li>• Inclusion health groups: vulnerable migrants, people experiencing homelessness and rough sleeping, people who engage in sex work, and Gypsy Roma and Traveller communities.</li> </ul> <p><i>Outcome:</i> Inequalities relating to incidence, prevalence, and consequences of infectious diseases. Despite specific interest in TB, HIV, STIs, HCV, immunisation, and AMR, we included reviews relating to any infectious diseases, except reviews focused on COVID-19.</p> <p><i>Types of reviews:</i> Any literature review which reports all the following (a) explicit objectives, (b) clear search strategies and (c) eligibility criteria.</p> <p><i>Publication date:</i> Published from the year 2000 onwards.</p> <p><i>Language:</i> No language restrictions.</p> | <p>We excluded reviews of qualitative studies and articles that are not systematic reviews as defined above. We excluded review protocols, but we searched the titles to check if the findings had been published. We excluded reviews on COVID-19, as advised by PHE, to avoid overlap with other reviews. We also excluded articles focussed on travel-related infections. Reviews which excluded the UK in their eligibility criteria or had not included populations relevant to the UK population (for example, papers where all results were from low-income countries) were excluded.</p> |

## Data extraction

We designed and piloted a data extraction form in Microsoft Excel to extract information including: first author's last name, publication year, corresponding author's country, review methodology,

1  
2  
3 inclusion and exclusion criteria, infectious disease(s), population(s) included, dimension(s) of  
4 inequality, outcomes, conclusions, and strengths and limitations. Data extraction was performed by  
5 one reviewer and checked by another.  
6  
7  
8  
9

## 10 **Quality assessment**

11  
12

13 Two reviewers independently assessed review quality using the Assessment of Multiple Systematic  
14 Reviews version 2 (AMSTAR2) checklist [16]. Disagreements were resolved by discussion. Due to  
15 the multidimensional nature of this overview of reviews, inclusion of various types of reviews with  
16 diverse aims and outcomes, we did not perform overall rating of confidence for each review. To  
17 provide a sense of overall quality of evidence, we calculated the proportion of reviews which  
18 fulfilled each AMSTAR-2 item.  
19  
20  
21  
22  
23  
24

## 25 **Data synthesis**

26  
27  
28

29 We tabulated the dimension of inequalities against the infectious disease topic to create an evidence  
30 matrix which was used to highlight areas where reviews already exist and where there may be gaps.  
31 Data were synthesised narratively based on the dimensions of inequalities.  
32  
33  
34  
35

## 36 **RESULTS**

37  
38

39 Figure 1 shows the study selection. We retrieved 14713 citations from the electronic database  
40 searches and 11135 titles and abstracts were screened after the removal of duplicates. One of the  
41 experts we contacted sent an article which highlighted UK-based evidence for several inclusion  
42 health groups, but did not fulfil other criteria for inclusion [17]. After examining 437 full text articles  
43 against the eligibility criteria, 108 were included in our synthesis.  
44  
45  
46  
47  
48

49 Characteristics of included reviews are summarised in online supplemental file 2. Included reviews  
50 were published between 2005-2020 with 95% published after 2010. Fifty-eight (54%) included meta-  
51 analysis while the remaining studies used narrative/descriptive synthesis approaches. The reviews  
52 covered the three dimensions of inequalities across various infectious disease topics. A summarised  
53 version of the evidence matrix, showing how many reviews were identified for each cell is presented  
54 in Figure 2. The full evidence matrix is presented in online supplemental file 3.  
55  
56  
57  
58  
59  
60

### Methodological quality of included reviews

Assessment of the methodological quality of each included review is presented in online supplemental file 4 and the proportion of included reviews that met each AMSTAR2 Criteria are presented in Figure 3. Many reviews fulfilled criteria such as including components of PICOS in their research questions and inclusion criteria (87%), performing duplicate study selection (55%), discussing heterogeneity (70%) and disclosure of conflicts of interest (83%). Only a few of the reviews (19%) clearly indicated that the review methods were established *a priori* and 37% performed risk of bias assessment using satisfactory techniques. Although only 24% of the included reviews were judged to have comprehensive literature search, 59% were classed as “partial yes” for literature search often due to lack of grey literature searches. Justification of the exclusions for each excluded study were not presented and none reported funding sources for included studies. These two criteria are more common among Cochrane reviews of interventions and are generally omitted from most published non-Cochrane reviews.

### Evidence Relating to Inclusion Health Groups

Of the 108 included reviews, 43 reported on inclusion health groups. The evidence is generally consistent across these groups showing that people who belong to inclusion health groups are often at higher risk of infectious diseases, AMR and under-vaccination. For example, many reviews reported on general migrants [14, 18-41], and vulnerable migrants such as asylum seekers, refugees, and trafficked sex workers [14, 19, 22, 28, 34, 42, 43]. The reviews often reported that migrants have a higher risk of infectious diseases than the host population, though the magnitude of the association may vary for different geographical regions and different infectious diseases. For example, in the UK, 35% of people with chronic HCV are migrants despite being just 9% of the general population [20]. Other reviews showed that HIV and STIs were more prevalent among migrants [31, 32]. The prevalence of HIV-TB co-infection was higher among immigrants compared with nationals in various countries including England and Wales although the immigrant group reported slightly better survival/lower mortality which authors commented may be due to the possible healthy migrant effect [37]. In another review, migrants were reported to be at higher risk of TB death [26]. Evidence from the UK showed an increasing number of migrants contracted HIV after they arrived in the UK between 2002-2011 suggesting that the higher prevalence of infectious diseases among migrants is not limited to pre-migration infection [27]. A meta-analysis showed that refugees were more likely to have chronic HBV compared to general migrants (Odds ratio (OR) 1.42 95% CI 1.01 to 1.99) [34].

1  
2  
3 Some reviews reported no clear evidence that immigrant sex workers had higher risk of HIV and  
4 STIs compared with non-migrant sex workers [40, 41]. However, one reported that trafficked sex  
5 workers were at a higher risk of HIV and STIs compared to female sex workers in general [43]. The  
6 prevalence of *Helicobacter pylori* among immigrants varied according to continent of origin and the  
7 prevalence is higher among migrants compared with their children [29].  
8  
9  
10  
11  
12

13 Several reviews reported lower vaccination rates or delayed/incomplete vaccination among migrants  
14 and refugees in Europe [25, 28, 30, 36]. However, the association may vary depending on the type of  
15 migrant group. For example, authors have reported that the uptake of vaccination among refugees  
16 was lower compared with asylum seekers [19]. In a meta-analysis, migrants had increased odds of  
17 MDR-TB incidence compared to non-migrants (OR 3.91, 95% CI 2.98–5.14) [38]. In two other  
18 reviews, AMR carriage and infection were reported to be more prevalent among migrants in Europe  
19 [21, 42].  
20  
21  
22  
23  
24  
25  
26

27 Three reviews examined Gypsy Roma and Traveller communities [8, 44, 45]. One showed that Roma  
28 and Irish Travellers in the UK were often under-vaccinated [8]. Another reported that Roma in  
29 Barcelona had a TB incidence 5.3 times greater than Spain's national TB incidence [45]. Higher  
30 prevalence of HIV has also been reported among Iranian, Roma, and Peruvian Indigenous  
31 populations compared to the general population [44]. We did not identify any reviews that examined  
32 the association between being from Gypsy Roma or Traveller communities and AMR.  
33  
34  
35  
36  
37  
38  
39  
40

41 We identified eight reviews which examined the association of homelessness with infectious  
42 diseases. They all reported a higher risk of various infectious diseases or AMR among people  
43 experiencing homelessness compared to those who were not homeless [26, 35, 46-51]. We did not  
44 identify any reviews that examined the association between vaccination and homelessness. Eight  
45 reviews explored infectious disease risks among those engaging in sex work compared to the general  
46 population [39, 43, 52-57]. The evidence suggests higher risks of various infectious diseases, such as  
47 HBV, HDV, HIV and HPV, among sex workers [39, 52-54, 56, 57]. A review which examined  
48 factors associated with HBV vaccination among MSM found mixed evidence relating to sexual risk-  
49 taking including involvement in sex trade [55]. We did not identify any reviews exploring the  
50 association of being a sex worker with AMR.  
51  
52  
53  
54  
55  
56  
57  
58  
59  
60

### Evidence Relating to Protected Characteristics

Seventy-four reviews reported on protected characteristics, however, our synthesis only found clear evidence for inequalities by ethnicity and sexual orientation. Inequalities in infectious diseases relating to race and ethnicity were explored in 19 reviews [26, 30, 33, 36, 49, 51, 55, 58-69]. The available evidence suggests a higher rate of various infectious diseases such as TB, HIV, and STIs and under-vaccination in people who belong to an ethnic minority group. For example, a meta-analysis found that recent transmission of TB was associated with being of ethnic minority (OR 3.03, 95% CI 2.21- 4.16) [49]. A meta-analysis indicated that on average young Black women were less likely to initiate HPV vaccination than young White women (combined OR: 0.89, 95% CI: 0.82–0.97) [61]. In a meta-analysis of studies from Europe, children from parents of ethnic minorities (compared to the majority) were less likely to be vaccinated for measles, mumps and rubella (OR 0.89, CI 0.86–0.93 in a fixed effect model) [67]. However, the effect disappeared in the random effects model (OR 1.03, 95% CI 0.79–1.34), probably due to heterogeneity between studies [67]. Seasonal influenza vaccine uptake among older people was associated with being White (combined OR 1.30, 95% CI 1.14–1.49) [30]. Only one review on race and AMR was identified and it reported that people from some Black ethnic groups in the USA and Europe, and Aboriginal ethnic groups living in Canada and Australia are less likely to have AMR-Neisseria gonorrhoea (AMR-NG) than the White majority population [58]. Ten included reviews examined the association of sexual orientation with infectious disease topics, mostly focused on MSM [24, 51, 53, 54, 56, 58, 70-73]. In a review, MSM were found to be at risk of acquiring HIV post-migration [71]. However, in a network meta-analysis the highest risk of advanced HIV disease among people living with HIV was found in those with heterosexual contact compared with MSM as well as injection drug use [70]. Some reviews examined disparities of HIV in MSM but did not compare risk between MSM and other populations [33, 64]. Other infectious diseases such as HBV, HCV and HDV are also higher in MSM than in the general population [24, 54, 72]. AMR-NG was reported to be more common among MSM than heterosexual men in England and Wales (OR 5.47, 95% CI 3.99–7.48) [58]. We did not identify any reviews which assessed the association of sexual orientation with vaccination.

From the reviews identified, inequalities in infectious disease topics based on other protected characteristics, such as age and sex are mixed, and for other protected characteristics the synthesised evidence is scant and inconclusive. The association of infectious diseases with age has been reported in various reviews [21, 22, 30, 36, 49, 51, 55-60, 62, 63, 65, 67, 69, 74-103]. However, the association varied. Infectious diseases such as HIV, STIs, and TB have been reported to be

1  
2  
3 associated with younger age in some reviews [49, 58, 76, 79, 88], while HCV and Hepatitis E (HEV)  
4 were associated with older age [22, 82, 95]. Seasonal influenza vaccine uptake was higher in older  
5 age groups [30, 65, 69, 100]. A review reported that many studies found an association between  
6 HBV vaccination and younger age [55]. Suboptimal vaccination compliance was associated with  
7 mother's younger age [36, 63]. On the other hand, another review reported that HPV vaccine  
8 intention and initiation were positively associated with younger parent's age [62]. Four included  
9 reviews examined the association of AMR with age [21, 58, 102, 103]. In one review, MDR TB was  
10 associated with being younger than 65 years (pooled OR 2.53, 95% CI 1.74 – 4.83)[21] while  
11 another review reported that AMR-NG was more common in those 25 years or older than in younger  
12 adults [58]. Overall, age group classifications often varied between reviews which made it difficult to  
13 identify a clear pattern.  
14  
15  
16  
17  
18  
19  
20  
21  
22  
23

24 Twenty-eight reviews explored inequalities based on sex [21, 39, 40, 46, 48, 49, 51, 53, 58, 65, 67,  
25 74, 78, 82, 84, 85, 87, 89, 90, 93, 96, 100, 104-109], but the findings varied depending on specific  
26 infectious disease. For example, TB transmission was reported to be associated with being male [48,  
27 49] while the prevalence of chlamydia was slightly higher in females than in males [78]. Other  
28 reviews reported that seasonal influenza vaccine uptake is often higher in elderly men compared to  
29 elderly women, but the differences are not statistically significant in multivariate regression analysis  
30 [65]. A meta-analysis of studies from Europe showed that male patients were more likely to have  
31 MDR TB (OR 1.38, 95% CI 1.16 – 1.65) [21].  
32  
33  
34  
35  
36  
37  
38

39 Six reviews described the influence of being married or in civil partnerships on vaccination [25, 30,  
40 65, 67, 69, 96]. Generally, those who were married had higher vaccination uptake although some  
41 studies found no association or higher uptake among those who were never married. No included  
42 review examined inequalities in infectious disease prevalence or AMR based on marital status. Only  
43 four included reviews reported the prevalence of infectious diseases (HBV, HCV, latent or acute  
44 toxoplasma infection) in pregnant women compared with the general population and the findings  
45 were mixed [22, 24, 56, 110]. We found no reviews that examined the association of pregnancy with  
46 vaccination uptake or risk of AMR.  
47  
48  
49  
50  
51  
52  
53

54 Six reviews reported on inequalities relating to religion and meningococcal disease, as well as  
55 vaccination [8, 25, 59, 61, 63, 90]. A recent meta-analysis of two studies showed that religious  
56 events attendance was significantly associated with a decreased risk of invasive meningococcal  
57 disease (OR 0.47 (95% CI, 0.28–0.79, p 0.0004) [90]. Meta-analyses showed no strong evidence  
58  
59  
60

1  
2  
3 between various vaccination and religion including frequency of attendance at a place of worship  
4 [25, 61]. Jewish Orthodox people in the UK and Belgium and Orthodox Protestants in the  
5 Netherlands were described as being under-vaccinated [8]. We did not identify any studies on the  
6 association of religion with the risk of any of the key infectious diseases or AMR.  
7  
8  
9

10  
11 Two reviews examined the association between gender reassignment and the risk of infectious  
12 diseases (HIV and HBV) [53, 56]. The prevalence of HIV was significantly higher among  
13 transgender female sex workers compared with biologically female sex workers (RR = 4.02, 95% CI  
14 1.60 - 10.11).[53] However, in another review, transgender persons had lower prevalence of HBV  
15 compared to other groups such as sex workers, injection drug users, MSM and pregnant women [56].  
16 We did not identify any reviews examining the association of gender reassignment with other  
17 infectious diseases of interest, vaccination or AMR.  
18  
19  
20  
21  
22  
23  
24

25 We did not identify any review that reported the association of disability with our key infectious  
26 diseases topics. However, we identified one review which reported that disability was associated  
27 with a higher incidence of listeriosis [111].  
28  
29  
30  
31

### 32 **Evidence Relating to Socioeconomic Inequalities**

33  
34 Fifty reviews explored socioeconomic status. The evidence consistently shows that those with lower  
35 level of income, lower educational attainment, unemployment, higher area level deprivation, lower  
36 socioeconomic status, or poor living situations are at higher risk of infectious diseases, AMR and  
37 lower vaccine uptake. For example, many reviews highlighted that low income, poverty and  
38 unemployment were associated with various infectious diseases including, HIV, STIs, TB, HBV and  
39 HCV among others [26, 27, 35, 39, 64, 75, 82, 84, 85, 90, 94, 111-114].  
40  
41  
42  
43  
44  
45  
46

47 Level of education, income or occupation are often associated with vaccination uptake [19, 25, 30,  
48 36, 55, 60, 61, 63, 65, 67, 69, 100, 115-119]. Reviews have also reported an association of MDR-TB  
49 and AMR with lower level of income or education [47, 120, 121]. Many reviews examined the  
50 association of infectious disease topics of interest with areal level socioeconomic status [25, 30, 36,  
51 59, 60, 63, 65, 69, 100, 116, 119, 122], deprivation [61, 65, 66, 75, 78, 111, 119, 123], or living  
52 situation [30, 36, 44, 47, 49, 51, 60, 65, 67, 69, 84, 85, 87, 90, 94, 96, 101, 105, 113, 121]. One meta-  
53 analysis showed significant association between neighbourhood deprivation and chlamydia infection  
54 (pooled OR 1.76, 95 % CI: 1.14–1.49) [78]. In another meta-analysis, TB was associated with  
55  
56  
57  
58  
59  
60

1  
2  
3 residing in an urban area (OR 1.52, 95%CI 1.35–1.72) [49]. Those living in overcrowded or poor  
4 housing conditions had higher risk of TB [44]. AIDS mortality is significantly associated with lower  
5 socioeconomic status [122]. Group A Streptococcal infection, gastrointestinal infections and  
6 meningococcal disease were associated with poor living conditions [75, 84, 85, 90, 111, 113].  
7  
8  
9

10  
11 Two included reviews explored the association between AMR and areal level deprivation [47, 121].  
12 Although the evidence is scant, the findings suggests that those living in deprived areas or poor  
13 living conditions may be at higher risk of AMR.  
14  
15  
16

## 17 18 19 **DISCUSSION**

20  
21 This overview of reviews provides a broad synopsis of three dimensions of inequalities (inclusion  
22 health groups, protected characteristics, and socio-economic inequalities) across several infectious  
23 disease topics. We synthesised the existing evidence based on the dimension of inequalities. Of the  
24 three dimensions of inequalities assessed, the evidence relating to people in the inclusion health  
25 groups is the most consistent although the volume of evidence identified for each group varied. Most  
26 of the reviews identified under this dimension were on migration status, with a higher prevalence of  
27 infectious diseases, AMR and lower vaccine uptake among migrants compared to non-migrants.  
28 Vulnerable migrants (such as refugees, asylum-seekers, and trafficked persons) are at higher risk  
29 when compared to general migrants and the size of inequalities varied depending on the country of  
30 origin. Although few reviews were identified for the remaining inclusion health groups, the evidence  
31 suggests that homelessness is associated with risk of infectious diseases and AMR; Gypsy Roma/  
32 Traveller communities are often under vaccinated and are also at greater risk of infectious diseases;  
33 and people who engage in sex work are at greater risk of some infectious diseases.  
34  
35  
36  
37  
38  
39  
40  
41  
42  
43  
44

45  
46 There is a plethora of evidence from reviews showing higher prevalence of infectious diseases and  
47 under-vaccination among minority ethnic groups. We also identified several reviews suggesting  
48 higher prevalence of infectious diseases and AMR among MSM. These suggest that ethnicity and  
49 sexual orientation are important protected characteristics and targeting or tailoring interventions for  
50 such groups may be beneficial to reduce inequalities in infectious diseases. It is important to note that  
51 there is inequality in access to vaccinations as shown in reviews included in this overview of reviews  
52 and beyond. Since many infectious diseases are vaccine preventable, identified inequalities in  
53 infectious diseases that we have noted in this overview of reviews, may also be related to inequalities  
54 in access to vaccination.  
55  
56  
57  
58  
59  
60



1  
2  
3  
4  
5 Many reviews examined the association with age and sex, however, the identified associations varied  
6 depending on the specific infectious disease or type of vaccination. In addition, for most of the  
7 reviews, the comparator age groups were often unclear. Therefore, we are not able to identify  
8 specific age groups with higher risk across various infectious disease topics. Other factors besides  
9 equity issues may contribute significantly to associations with age. For example, people in the most  
10 sexually active age groups are more likely to contract STIs whereas people of older ages, where  
11 immunity is weaker, are more likely to get infectious diseases associated with low immunity. Also,  
12 vaccinations are often offered at specific ages so it is expected that uptake would be higher among  
13 those groups that are targeted. However, it is important to highlight that we found evidence  
14 suggesting that childhood vaccination compliance is lower for those with younger  
15 mothers/parents[36, 59, 63]. Based on this review, age and sex may be important for some infectious  
16 diseases but the group at higher risk may vary across diseases.  
17  
18  
19  
20  
21  
22  
23  
24  
25  
26

27 Reviews exploring marital status focused on vaccination, particularly seasonal influenza vaccine in  
28 older adults, tetanus vaccination among pregnant women and MMR vaccination in children. Reviews  
29 generally reported higher vaccination uptake among adults who are married and children whose  
30 parents are married. It is not possible to draw a conclusion regarding the association of religion,  
31 disability, transgenderism, and pregnancy with infectious diseases based on the findings of this  
32 review as the synthesised evidence is scant and often inconsistent. More evidence is therefore needed  
33 to be able to establish the presence and direction of any associations of these factors with infectious  
34 diseases.  
35  
36  
37  
38  
39  
40  
41  
42

43 Several reviews provide compelling evidence of higher risk of infectious diseases, AMR, and lower  
44 vaccination uptake among those with lower level of income, lower educational attainment,  
45 unemployment, higher area level deprivation, lower socioeconomic status, and poor living situations.  
46 Although most of the evidence in this dimension is on vaccination, those of lower socioeconomic  
47 groups are often at higher risk from infectious diseases and should be targeted for intervention.  
48  
49  
50  
51  
52

### 53 **Strengths and limitations**

54  
55

56 The protocol used to guide the conduct of this review was designed a priori. We conducted a  
57 comprehensive literature search of four electronic databases with no language limits and searched for  
58 grey literature. Data extraction was checked by a second reviewer to improve accuracy and quality  
59  
60

1  
2  
3 assessments were performed by two reviewers independently. Due to the timeframe required for the  
4 work, we could not complete all the initial titles and abstract screening in duplicate, however, full  
5 texts of potentially relevant reviews were independently screened by two reviewers. Despite our best  
6 efforts, we acknowledge that some relevant reviews may have been missed in the study selection  
7 process. The lack of synthesised evidence observed in some areas does not necessarily mean a lack  
8 of evidence. This is because there may be primary studies in those areas which have not been  
9 synthesised in reviews and meta-analyses. Also, this project focussed on specific infectious disease  
10 topics and we included specific search terms for those topics in the search strategy and included  
11 broad terms for infectious diseases. This allowed us to include other infectious diseases that were  
12 identified in our search to capture evidence of health inequalities from various infectious diseases  
13 (excluding COVID-19). Therefore, this is not intended to provide a comprehensive overview of  
14 reviews in those topics which are not the focus of this project. Furthermore, some underserved  
15 populations (such as people who inject drugs and prisoners) are not covered in this overview as these  
16 are beyond the scope of the work. Notwithstanding, we believe this provides a useful summary of  
17 available evidence relating to inequalities in infectious diseases relevant to high-income countries  
18 and highlights areas where evidence may be lacking or minimal.  
19  
20  
21  
22  
23  
24  
25  
26  
27  
28  
29  
30  
31

32 The quality of the included reviews varied significantly as we included various types of reviews, and  
33 some were not necessarily systematic reviews for which AMSTAR2 is designed. Heterogeneity  
34 between studies was a limitation reported in many of the included reviews where meta-analyses were  
35 performed, therefore, pooled estimates should be interpreted with caution.  
36  
37  
38  
39  
40  
41  
42

### 43 **Conclusion**

44  
45  
46 Overall, we provide evidence from many papers with accordant findings, of groups consistently at  
47 higher risk of infectious diseases, AMR and under-vaccination. Developing targeted interventions for  
48 high-risk groups rather than focusing on individual infections could contribute significantly to  
49 reducing infectious disease burden. This reviews also highlights important evidence gaps that should  
50 be considered when commissioning future evidence syntheses or primary studies.  
51  
52  
53  
54  
55

### 56 **Figure Legends**

57  
58 Figure 1: PRISMA flow diagram for study selection.  
59  
60

1  
2  
3 Figure 2: Matrix showing the number of reviews identified for each dimension of inequality and  
4 infectious disease topic. Colour ranges from red which indicates where no review was identified, up  
5 to green for a maximum number of reviews (19).  
6  
7

8 Figure 3: AMSTAR2 results for included reviews  
9

## 10 11 **Acknowledgements**

12  
13  
14  
15 We would like to acknowledge colleagues from the University of Warwick, Samantha Johnson who  
16 supported us in developing the search strategy and Dr Yen-Fu Chen who helped with language  
17 translation. We are also grateful to those who responded to our request for information.  
18

19  
20 We also like to thank Dr Ines Campos-Matos from the UK Health Security Agency (UKHSA) and  
21 Office of Health Improvement and Disparities, Katy Sinka from the UKHSA, and Dr Rebecca  
22 Wilkinson from Hampshire Hospitals Foundation Trust for their support and guidance through the  
23 project. Abimbola Ayorinde and Iman Ghosh are funded by the National Institute for Health and  
24 Social Care Research (NIHR) Applied Research Collaboration (ARC) West Midlands, grant number  
25 NIHR200165. The views expressed are those of the author(s) and not necessarily those of the NIHR,  
26 the Department of Health and Social Care or Public Health England.  
27  
28  
29  
30  
31  
32  
33

34 **Contributors:** AAA, IG, BB, NM and OO contributed to the protocol development. AAA, IG, IA,  
35 IZ, MS, EM, SSA, and SR contributed to the selection of studies, data extraction and quality  
36 assessment. AAA conducted data synthesis and drafted the manuscript. All authors reviewed and  
37 approved the final manuscript.  
38  
39  
40  
41  
42

43 **Funding:** This work was funded by Public Health England. Abimbola Ayorinde and Iman Ghosh are  
44 funded by the National Institute for Health and Social Care Research (NIHR) Applied Research  
45 Collaboration (ARC) West Midlands, grant number NIHR200165.  
46  
47

48 **Competing interest:** None declared  
49

50 **Patient consent for publication:** Not required  
51

52 **Ethical Approval Statement:** This study does not involve human participants. This is a systematic  
53 overview of review of existing literature. Ethics approval is not applicable.  
54

55 **Data Sharing Statement:** All data relevant to the study are included in the article or uploaded as  
56 online supplemental information.  
57  
58  
59  
60

## REFERENCES

1. WHO WHO. Human rights and health 2017 [Available from: <https://www.who.int/news-room/fact-sheets/detail/human-rights-and-health>].
2. Marmot M. Inequalities in health. *New England Journal of Medicine*. 2001;345(2):134-5.
3. Marmot M, Wilkinson R. *Social determinants of health*. Oxford2005.
4. Graham H. Social determinants and their unequal distribution: clarifying policy understandings. *Milbank Q*. 2004;82(1):101-24.
5. Quinn SC, Kumar S. Health inequalities and infectious disease epidemics: a challenge for global health security. *Biosecurity and bioterrorism: biodefense strategy, practice, and science*. 2014;12(5):263-73.
6. House of Parliament. UK Trends in Infectious Disease. In: *technology*. Poosa, editor. 545 ed2017.
7. CDC CfDCaP. *Vaccines and Preventable Diseases* 2016 [Available from: <https://www.cdc.gov/vaccines/vpd/index.html>].
8. Fournet N, Mollema L, Ruijs WL, Harmsen IA, Keck F, Dur, et al. Under-vaccinated groups in Europe and their beliefs, attitudes and reasons for non-vaccination; two systematic reviews. *BMC Public Health*. 2018;18(1):196.
9. Rotheram S, Cooper J, Barr B, Whitehead M. How are inequalities generated in the management and consequences of gastrointestinal infections in the UK? An ethnographic study. *Social Science & Medicine*. 2021;282:114131.
10. Hughes GJ, Gorton R. Inequalities in the incidence of infectious disease in the North East of England: a population-based study. (1469-4409 (Electronic)).
11. PHE PHE. Health protection report, Weekly report.; 2016. Contract No.: 22.
12. Baker EH. Socioeconomic Status, Definition. *The Wiley Blackwell Encyclopedia of Health, Illness, Behavior, and Society*. 2014:2210-4.
13. PHE PHE. Public Health Matters [Internet]2019. [16th April, 2021]. Available from: <https://publichealthmatters.blog.gov.uk/2019/03/22/tackling-tuberculosis-in-under-served-populations/>.
14. Chernet A, Utzinger J, Sydow V, Probst-Hensch N, Paris DH, Labhardt ND, et al. Prevalence rates of six selected infectious diseases among African migrants and refugees: a systematic review and meta-analysis. *European Journal of Clinical Microbiology & Infectious Diseases*. 2018;37(4):605-19.
15. Semenza JC, Giesecke J. Intervening to reduce inequalities in infections in Europe. *Am J Public Health*. 2008;98(5):787-92.
16. Shea BJ, Reeves BC, Wells G, Thuku M, Hamel C, Moran J, et al. AMSTAR 2: a critical appraisal tool for systematic reviews that include randomised or non-randomised studies of healthcare interventions, or both. *BMJ*. 2017;358:j4008.
17. Stevens A. Putting high-risk under-served populations at the centre of joint efforts to eliminate Hepatitis B and C, Tuberculosis and HIV and halt the rise in sexually transmitted infections PHE Infectious Diseases Strategy 2020-20252020.
18. Chan IHY, Kaushik N, Dobler CC. Post-migration follow-up of migrants identified to be at increased risk of developing tuberculosis at pre-migration screening: a systematic review and meta-analysis. *The Lancet Infectious Diseases*. 2017;17(7):770-9.
19. De Vito E, Parente P, de Waure C, Poscia A, Ricciardi W. A review of evidence on equitable delivery, access and utilization of immunization services for migrants and refugees in the WHO

- 1  
2  
3 European Region. WHO Regional Office for Europe WHO Health Evidence Network Synthesis  
4 Reports. 2017.
- 5 20. Falla AM, Ahmad AA, Duffell E, Noori T, Veldhuijzen IK. Estimating the scale of chronic  
6 hepatitis C virus infection in the EU/EEA: a focus on migrants from anti-HCV endemic countries.  
7 2018(1471-2334 (Electronic)).
- 8 21. Faustini A, Hall AJ, Perucci CA. Risk factors for multidrug resistant tuberculosis in Europe: a  
9 systematic review. *Thorax*. 2006;61(2):158-63.
- 10 22. Greenaway C, Thu Ma A, Kloda LA, Klein M, Cnossen S, Schwarzer G, et al. The  
11 Seroprevalence of Hepatitis C Antibodies in Immigrants and Refugees from Intermediate and High  
12 Endemic Countries: A Systematic Review and Meta-Analysis. *PLoS ONE [Electronic Resource]*.  
13 2015;10(11):e0141715.
- 14 23. gren A, Schepisi MS, Sotgiu G, Huitric E, Migliori GB, Manissero D, et al. Tuberculosis  
15 transmission between foreign- and native-born populations in the EU/EEA: a systematic review.  
16 *European Respiratory Journal*. 2014;43(4):1159-71.
- 17 24. Hahne SJM, Veldhuijzen IK, Wiessing L, Lim TA, Salminen M, van de Laar M. Infection  
18 with hepatitis B and C virus in Europe: a systematic review of prevalence and cost-effectiveness of  
19 screening. *Bmc Infectious Diseases*. 2013;13:16.
- 20 25. Jain A, van Hoek AJ, Boccia D, Thomas SL. Lower vaccine uptake amongst older  
21 individuals living alone: A systematic review and meta-analysis of social determinants of vaccine  
22 uptake. *Vaccine*. 2017;35(18):2315-28.
- 23 26. Kawatsu L Fau - Ishikawa N, Ishikawa N. [Socio-economic factors that influence  
24 tuberculosis death among the youth and middle-aged population: a systematic review]. 2014(0022-  
25 9776 (Print)).
- 26 27. Kentikelenis A, Karanikolos M, Williams G, Mladovsky P, King L, Pharris A, et al. How do  
27 economic crises affect migrants' risk of infectious disease? A systematic-narrative review. *European*  
28 *Journal of Public Health*. 2015;25(6):937-44.
- 29 28. Mipatrini D, Stefanelli P, Severoni S, Rezza G. Vaccinations in migrants and refugees: a  
30 challenge for European health systems. A systematic review of current scientific evidence. *Pathogens*  
31 *and Global Health*. 2017;111(2):59-68.
- 32 29. Morais S, Costa AR, Ferro A, Lunet N, Peleteiro B. Contemporary migration patterns in the  
33 prevalence of *Helicobacter pylori* infection: A systematic review. *Helicobacter*. 2017;22(3).
- 34 30. Okoli GN, Lam OLT, Racovitan F, Reddy VK, Righolt CH, Neilson C, et al. Seasonal  
35 influenza vaccination in older people: A systematic review and meta-analysis of the determining  
36 factors. *Plos One*. 2020;15(6):26.
- 37 31. Platt L, Grenfell P, Fletcher A, Sorhaindo A, Jolley E, Rhodes T, et al. Systematic review  
38 examining differences in HIV, sexually transmitted infections and health-related harms between  
39 migrant and non-migrant female sex workers. *Sexually Transmitted Infections*. 2013;89(4):311-9.
- 40 32. Platt L, Jolley E, Rhodes T, Hope V, Latypov A, Reynolds L, et al. Factors mediating HIV  
41 risk among female sex workers in Europe: a systematic review and ecological analysis. *BMJ Open*.  
42 2013;3(7).
- 43 33. Prost A, Elford J, Imrie J, Petticrew M, Hart GJ. Social, behavioural, and intervention  
44 research among people of Sub-Saharan African origin living with HIV in the UK and Europe:  
45 literature review and recommendations for intervention. *AIDS & Behavior*. 2008;12(2):170-94.
- 46 34. Rossi C, Shrier I, Marshall L, Cnossen S, Schwartzman K, Klein MB, et al. Seroprevalence  
47 of chronic hepatitis B virus infection and prior immunity in immigrants and refugees: a systematic  
48 review and meta-analysis. *PLoS ONE [Electronic Resource]*. 2012;7(9):e44611.
- 49 35. Suhrcke M, Stuckler D, Suk JE, Desai M, Senek M, McKee M, et al. The impact of economic  
50 crises on communicable disease transmission and control: a systematic review of the evidence. *PLoS*  
51 *ONE [Electronic Resource]*. 2011;6(6):e20724.
- 52  
53  
54  
55  
56  
57  
58  
59  
60

- 1
- 2
- 3
- 4 36. Tauil Mde C, Sato AP, Waldman EA. Factors associated with incomplete or delayed
- 5 vaccination across countries: A systematic review. 2016(1873-2518 (Electronic)).
- 6 37. Tavares AM, Fronteira I, Couto I, Machado D, Viveiros M, Abecasis AB, et al. HIV and
- 7 tuberculosis co-infection among migrants in Europe: A systematic review on the prevalence,
- 8 incidence and mortality. *PLoS ONE* [Electronic Resource]. 2017;12(9):e0185526.
- 9 38. Jackson S, Kabir Z, Comiskey C. Effects of migration on tuberculosis epidemiological
- 10 indicators in low and medium tuberculosis incidence countries: A systematic review. *Journal of*
- 11 *Clinical Tuberculosis and Other Mycobacterial Diseases*. 2021;23(6):100225.
- 12 39. Kabapy AF, Shatat HZ, Abd El-Wahab EA-O. Attributes of HIV infection over decades
- 13 (1982-2018): A systematic review and meta-analysis. *Transbound Emerg Dis* 2020;67(6):2372-88.
- 14 40. McBride B, Shannon K, Strathdee SA, Goldenberg SM. Structural determinants of HIV/STI
- 15 prevalence, HIV/STI/sexual and reproductive health access, and condom use among immigrant sex
- 16 workers globally. *AIDS*. 2021;35(9):1461-77.
- 17 41. Pega FA-O, Govindaraj S, Tran NT. Health service use and health outcomes among
- 18 international migrant workers compared with non-migrant workers: A systematic review and meta-
- 19 analysis. *PloS one*. . 2021;16(6):e0252651.
- 20 42. Nellums LB, Thompson H, Holmes A, Castro-Sanchez E, Otter JA, Norredam M, et al.
- 21 Antimicrobial resistance among migrants in Europe: a systematic review and meta-analysis. *The*
- 22 *Lancet Infectious Diseases*. 2018;18(7):796-811.
- 23 43. Yu YJ, Bruna S, McCarty C. HIV Risk among trafficked women: a systematic review of the
- 24 global literature. *Aids Care-Psychological and Socio-Medical Aspects of Aids/Hiv*. 2020:11.
- 25 44. Cormier M, Schwartzman K, N'Diaye DS, Boone CE, Dos Santos AM, Gaspar J, et al.
- 26 Proximate determinants of tuberculosis in Indigenous peoples worldwide: a systematic review. *The*
- 27 *Lancet Global Health*. 2019;7(1):e68-e80.
- 28 45. Tollefson D, Bloss E, Fanning A, Redd JT, Barker K, McCray E. Burden of tuberculosis in
- 29 indigenous peoples globally: A systematic review. *International Journal of Tuberculosis and Lung*
- 30 *Disease*. 2013;17(9):1139-50.
- 31 46. Aldridge RW, Story A, Hwang SW, Nordentoft M, Luchenski SA, Hartwell G, et al.
- 32 Morbidity and mortality in homeless individuals, prisoners, sex workers, and individuals with
- 33 substance use disorders in high-income countries: a systematic review and meta-analysis. *Lancet*.
- 34 2018;391(10117):241-50.
- 35 47. Alivizda V, Mariano V, Ahmad R, Charani E, Rawson TM, Holmes AH, et al. Investigating
- 36 the impact of poverty on colonization and infection with drug-resistant organisms in humans: a
- 37 systematic review. *Infectious Diseases of Poverty*. 2018;7(1):76.
- 38 48. Beijer U, Wolf A, Fazel S. Prevalence of tuberculosis, hepatitis C virus, and HIV in homeless
- 39 people: a systematic review and meta-analysis. *The Lancet Infectious Diseases*. 2012;12(11):859-70.
- 40 49. Nava-Aguilera E, Andersson N, Harris E, Mitchell S, Hamel C, Shea B, et al. Risk factors
- 41 associated with recent transmission of tuberculosis: systematic review and meta-analysis.
- 42 *International Journal of Tuberculosis and Lung Disease*. 2009;13(1):17-26.
- 43 50. Arum C, Fraser H, Artenie AA, Bivegete S, Trickey A, Alary M, et al. Homelessness,
- 44 unstable housing, and risk of HIV and hepatitis C virus acquisition among people who inject drugs: a
- 45 systematic review and meta-analysis. *The Lancet Public health*. 2021;6(5):e309–e23.
- 46 51. Ly TDA, Castaneda S, Hoang VT, Dao TL, Gautret P. Vaccine-preventable diseases other
- 47 than tuberculosis, and homelessness: A systematic review of the published literature, 1980 to 2020.
- 48 *medRxiv*. 2020:2020.10.28.20220335.
- 49 52. Oldenburg CE, Perez-Brumer AG, Reisner SL, Mimiaga MJ. Transactional Sex and the HIV
- 50 Epidemic Among Men Who have Sex with Men (MSM): Results From a Systematic Review and
- 51 Meta-analysis. *AIDS & Behavior*. 2015;19(12):2177-83.
- 52
- 53
- 54
- 55
- 56
- 57
- 58
- 59
- 60

53. Operario D, Soma T, Underhill K. Sex work and HIV status among transgender women: systematic review and meta-analysis. *Journal of Acquired Immune Deficiency Syndromes: JAIDS*. 2008;48(1):97-103.
54. Stockdale AJ, Kreuels B, Henrion MYR, Giorgi E, Kyomuhangi I, de Martel C, et al. The global prevalence of hepatitis D virus infection: Systematic review and meta-analysis. *Journal of Hepatology*. 2020;73(3):523-32.
55. Vet R, de Wit JB, Das E. Factors associated with hepatitis B vaccination among men who have sex with men: a systematic review of published research. *International Journal of STD & AIDS*. 2017;28(6):534-42.
56. Leumi S, Bigna JJ, Amougou MA, Ngouo A, Nyaga UF, Noubiap JJ. Global Burden of Hepatitis B Infection in People Living With Human Immunodeficiency Virus: A Systematic Review and Meta-analysis. *Clin Infect Dis*. 2020;71(11):2799-806.
57. Wu J, Ding C, Liu X, Zhou Y, Tian G, Lan L, et al. Worldwide burden of genital human papillomavirus infection in female sex workers: a systematic review and meta-analysis. *International journal of epidemiology*. 2021;50(2):527-37.
58. Abraha M, Egli-Gany D, Low N. Epidemiological, behavioural, and clinical factors associated with antimicrobial-resistant gonorrhoea: a review. *F1000Research*. 2018;7:400.
59. Falagas ME, Zarkadoulia E. Factors associated with suboptimal compliance to vaccinations in children in developed countries: a systematic review. 2008(1473-4877 (Electronic)).
60. Fern, ez de Casadevante V, Gil Cuesta J, Cantarero-Arevalo L. Determinants in the Uptake of the Human Papillomavirus Vaccine: A Systematic Review Based on European Studies. *Frontiers in Oncology*. 2015;5:141.
61. Fisher H, Trotter CL, Audrey S, MacDonald-Wallis K, Hickman M. Inequalities in the uptake of human papillomavirus vaccination: a systematic review and meta-analysis. *International Journal of Epidemiology*. 2013;42(3):896-908.
62. Gorjana R, Chapman J, Flight I, Wilson C. Factors associated with parents' attitudes to the HPV vaccination of their adolescent sons : A systematic review. *Preventive Medicine*. 2017;95(1):26-37.
63. Malerba V, Costantino C, Napoli G, Marchese V, Casuccio A, Tabacchi G, et al. Antimeningococcal and antipneumococcal vaccination determinants: a European systematic literature review. 2015(1120-9763 (Print)).
64. Millett GA, Peterson JI, Flores SA, Flores Sa Fau - Hart TA, Hart Ta Fau - Jeffries WL, Jeffries Wl 4th Fau - Wilson PA, Wilson Pa Fau - Rourke SB, et al. Comparisons of disparities and risks of HIV infection in black and other men who have sex with men in Canada, UK, and USA: a meta-analysis. 2012(1474-547X (Electronic)).
65. Nagata JM, Hern, ez-Ramos I, Kurup AS, Albrecht D, Vivas-Torrealba C, et al. Social determinants of health and seasonal influenza vaccination in adults  $\geq 65$  years: a systematic review of qualitative and quantitative data. *BMC Public Health*. 2013;13:388.
66. Offer C, Lee A, Humphreys C. Tuberculosis in South Asian communities in the UK: a systematic review of the literature. *Journal of Public Health*. 2015;38(2):250-7.
67. Tabacchi G, Costantino C, Napoli G, Marchese V, Cracchiolo M, Casuccio A, et al. Determinants of European parents' decision on the vaccination of their children against measles, mumps and rubella: A systematic review and meta-analysis. *Human vaccines & Immunotherapeutics*. 2016;12(7):1909-23.
68. Wayal S, Aicken CRH, Griffiths C, Blomquist PB, Hughes G, Mercer CH. Understanding the burden of bacterial sexually transmitted infections and *Trichomonas vaginalis* among black Caribbeans in the United Kingdom: Findings from a systematic review. *Plos One*. 2018;13(12):19.
69. Okoli GA-OX, Reddy VK, Al-Yousif Y, Neilson CJ, Mahmud SM, Abou-Setta AM. Sociodemographic and health-related determinants of seasonal influenza vaccination in pregnancy: A

- systematic review and meta-analysis of the evidence since 2000. *Acta obstetricia et gynecologica Scandinavica*. 2021;100(6):997-1009.
70. Chen Q, Zeng D, She Y, Lyu Y, Gong X, Feinstein MJ, et al. Different transmission routes and the risk of advanced HIV disease: A systematic review and network meta-analysis of observational studies. *EClinicalMedicine*. 2019;16:121-8.
71. Fakoya I, Alvarez-del Arco D, Woode-Owusu M, Monge S, Rivero-Montesdeoca Y, Delpech V, et al. A systematic review of post-migration acquisition of HIV among migrants from countries with generalised HIV epidemics living in Europe: implications for effectively managing HIV prevention programmes and policy. *BMC Public Health*. 2015;15:561.
72. Jin FY, Dore GJ, Matthews G, Luhmann N, Macdonald V, Bajis S, et al. Prevalence and incidence of hepatitis C virus infection in men who have sex with men: a systematic review and meta-analysis. *Lancet Gastroenterology & Hepatology*. 2020;6(1):39-56.
73. Oldenburg CE, Perez-Brumer AG, Reisner SL, Mattie J, Barnighausen T, Mayer KH, et al. Global burden of HIV among men who engage in transactional sex: a systematic review and meta-analysis. *PLoS ONE [Electronic Resource]*. 2014;9(7):e103549.
74. Colledge S, Leung J, Grebely J, Degenhardt L, Peacock A, Hickman M, et al. Socio-demographic and ecological factors associated with anti-HCV prevalence in people who inject drugs: A systematic review. *Drug & Alcohol Dependence*. 2020;209:107899.
75. Adams NL, Rose TC, Hawker J, Violato M, O'Brien SJ, Barr B, et al. Relationship between socioeconomic status and gastrointestinal infections in developed countries: A systematic review and meta-analysis. *PLoS ONE [Electronic Resource]*. 2018;13(1):e0191633.
76. Behera MR, Intarak R. HIV risk among labor migrants: An in-depth study of the literature. *Indian Journal of Public Health Research and Development*. 2020;9(12):107-15.
77. Bonten M, Johnson JR, van den Biggelaar AHJ, Georgalis L, Geurtsen J, de Palacios PI, et al. Epidemiology of *Escherichia coli* Bacteremia: A Systematic Literature Review. 2021(1537-6591 (Electronic)).
78. Crichton J, Hickman M, Campbell R, Batista-Ferrer H, Macleod J. Socioeconomic factors and other sources of variation in the prevalence of genital chlamydia infections: A systematic review and meta-analysis. *BMC Public Health*. 2015;15:729.
79. Denning DW, Kneale M, Sobel JD, Rautemaa-Richardson R. Global burden of recurrent vulvovaginal candidiasis: a systematic review. *The Lancet Infectious Diseases*. 2018;18(11):e339-e47.
80. Ghiasv, H, Higgs P, Noroozi M, Ghaedamini Harouni G, Hemmat M, et al. Social and demographical determinants of quality of life in people who live with HIV/AIDS infection: evidence from a meta-analysis. *Biodemography & Social Biology*. 2019;65(1):57-72.
81. Hermann JS, Featherstone RM, Russell ML, MacDonald SE. Immunization Coverage of Children in Care of the Child Welfare System in High-Income Countries: A Systematic Review. *American Journal of Preventive Medicine*. 2019;56(2):e55-e63.
82. Li P, Liu J, Li Y, Su J, Ma Z, Bramer WM, et al. The global epidemiology of hepatitis E virus infection: A systematic review and meta-analysis. *Liver International*. 2020;40(7):1516-28.
83. Lindsay L, Wolter J, De Coster I, Van Damme P, Verstraeten T. A decade of norovirus disease risk among older adults in upper-middle and high income countries: a systematic review. *BMC Infectious Diseases*. 2015;15:425.
84. Possenti A, Manzano-Román R, Sánchez-Ovejero C, Boufana B, La Torre G, Siles-Lucas M, et al. Potential Risk Factors Associated with Human Cystic Echinococcosis: Systematic Review and Meta-analysis. 2016(1935-2735 (Electronic)).
85. Richterman A, Sainvilien DR, Eberly L, Ivers LC. Individual and Household Risk Factors for Symptomatic Cholera Infection: A Systematic Review and Meta-analysis. 2018(1537-6613 (Electronic)).



- 1  
2  
3 86. Rostami A, Riahi SM, Contopoulos-Ioannidis DG, Gamble HR, Fakhri Y, Shiadeh MN, et al. Acute Toxoplasma infection in pregnant women worldwide: A systematic review and meta-analysis. *Plos Neglected Tropical Diseases*. 2019;13(10):20.
- 4  
5  
6 87. Rostami A, Riahi SM, Holl CV, Taghipour A, Khalili-Fomeshi M, et al. Seroprevalence estimates for toxocariasis in people worldwide: A systematic review and meta-analysis. *PLoS Neglected Tropical Diseases* [electronic resource]. 2019;13(12):e0007809.
- 7  
8  
9 88. Schepisi MS, Motta I, Dore S, Costa C, Sotgiu G, Girardi E. Tuberculosis transmission among children and adolescents in schools and other congregate settings: a systematic review. *New Microbiologica*. 2019;41(4):282-90.
- 10  
11  
12 89. Schierhout G, McGregor S, Gessain A, Einsiedel L, Martinello M, Kaldor J. Association between HTLV-1 infection and adverse health outcomes: a systematic review and meta-analysis of epidemiological studies. *Lancet Infectious Diseases*. 2020;20(1):133-43.
- 13  
14  
15 90. Spyromitrou-Xioufi P, Tsirigotaki M, Ladomenou F. Risk factors for meningococcal disease in children and adolescents: a systematic review and META-analysis. *European Journal of Pediatrics*. 2020;179(7):1017-27.
- 16  
17  
18 91. Strifler L, Morris SK, Dang V, Tu HT, Minhas R, Jamieson FB, et al. The health burden of invasive meningococcal disease: A systematic review. *Paediatrics and Child Health (Canada)*. 2016;19:e92.
- 19  
20  
21 92. Zamani M, Ebrahimitabar F, Zamani V, Miller WH, Alizadeh-Navaei R, Shokri-Shirvani J, et al. Systematic review with meta-analysis: the worldwide prevalence of Helicobacter pylori infection. *Alimentary Pharmacology and Therapeutics*. 2018;47(7):868-76.
- 22  
23  
24 93. Badri MA-OX, Eslahi AV, Olfatifar M, Dalvand S, Houshmand E, Abdoli A, et al. Keys to Unlock the Enigma of Ocular Toxocariasis: A Systematic Review and Meta-analysis. *Ocular immunology and inflammation*. 2021; Advance online publication.:1-12.
- 25  
26  
27 94. Dong S, Yang Y, Wang Y, Yang D, Yang Y, Shi Y, et al. Prevalence of Cryptosporidium Infection in the Global Population: A Systematic Review and Meta-analysis. *Acta Parasitol* 2020;65(4):882-9.
- 28  
29  
30 95. Dugan E, Blach S, Biondi M, Cai Z, DePaola M, Estes C, et al. Global prevalence of hepatitis C virus in women of childbearing age in 2019: a modelling study. *The Lancet Gastroenterology & Hepatology*. 2021;6(3):169-84.
- 31  
32  
33 96. Faria APV, da Silva TPR, Duarte CK, Mendes LL, Santos FBO, Matozinhos FP. Tetanus vaccination in pregnant women: a systematic review and meta-analysis of the global literature. *Public health*. 2021;196:43-51.
- 34  
35  
36 97. Lafond KA-O, Porter RA-O, Whaley MA-O, Suizan ZA-O, Ran ZA-O, Aleem MA-O, et al. Global burden of influenza-associated lower respiratory tract infections and hospitalizations among adults: A systematic review and meta-analysis. *PLoS Med*. 2021;18(3):e1003550.
- 37  
38  
39 98. Macina D, Evans KE. Bordetella pertussis in School-Age Children, Adolescents and Adults: A Systematic Review of Epidemiology and Mortality in Europe. *Infect Dis Ther*. 2021;10(4):2021-118.
- 40  
41  
42 99. Mirzadeh M, Olfatifar M, Eslahi AV, Abdoli A, Houshmand E, Majidiani H, et al. Global prevalence of Trichomonas vaginalis among female sex workers: a systematic review and meta-analysis. *Parasitol Res* 2021;120(7):2311-22.
- 43  
44  
45 100. Roller-Wirnsberger RA-O, Lindner S, Kolosovski L, Platzer E, Dovjak P, Flick H, et al. The role of health determinants in the influenza vaccination uptake among older adults (65+): a scope review. *Aging clinical and experimental research*. 2021;33(8):2123-32.
- 46  
47  
48 101. Rostami AA-O, Riahi SA-O, Abdollahzadeh Sagha S, Taghipour A, Sepidarkish M, Mohammadnia-Afrouzi MA-O, et al. Seroprevalence Estimates of Latent and Acute Toxoplasma Infections in HIV(+) People-Call for Action in Underprivileged Communities. *LID - 10.3390/microorganisms9102034* [doi] LID - 2034. *Communities Microorganisms*. 2021;9(10):2034.
- 49  
50  
51  
52  
53  
54  
55  
56  
57  
58  
59  
60

102. Song WM, Li YF, Liu YX, Liu Y, Yu CB, Liu JY, et al. Drug-Resistant Tuberculosis Among Children: A Systematic Review and Meta-Analysis. *Frontiers in public health*. 2021;9:721817.
103. Sultana ZZ, Hoque FU, Beyene J, Akhlak-UI-Islam M, Khan MHR, Ahmed S, et al. HIV infection and multidrug resistant tuberculosis: a systematic review and meta-analysis. *BMC Infectious Diseases*. 2021;21(1):51.
104. Eilami O, Nazari A, Dousti M, Sayehmiri F, Ghasemi M. Investigation of HIV/AIDS prevalence and associated risk factors among female sex workers from 2010 to 2017: a meta-analysis study. *HIV/AIDS Research and Palliative Care*. 2019;11:105-17.
105. Fauroux B, Simoes EAF, Checchia PA, Paes B, Figueras-Aloy J, Manzoni P, et al. The Burden and Long-term Respiratory Morbidity Associated with Respiratory Syncytial Virus Infection in Early Childhood. *Infectious Diseases and Therapy*. 2017;6(2):173-97.
106. Leung J, Peacock A, Colledge S, Grebely J, Cunningham EB, Hickman M, et al. A Global Meta-analysis of the Prevalence of HIV, Hepatitis C Virus, and Hepatitis B Virus Among People Who Inject Drugs-Do Gender-Based Differences Vary by Country-Level Indicators? *Journal of Infectious Diseases*. 2019;220(1):78-90.
107. Pulver A, Ramraj C, Ray JG, O'Campo P, Urquia ML. A scoping review of female disadvantage in health care use among very young children of immigrant families. *Social Science & Medicine*. 2016;152:50-60.
108. Van Gerwen O, Muzny C, Austin E, Musgrove K, Jani A. Prevalence of STIs and HIV in transgender women and men: A systematic review. *Sexually Transmitted Infections*. 2020;95:A335.
109. Whelan J, Abbing-Karahagopian V, Serino L, Unemo M. Gonorrhoea: a systematic review of prevalence reporting globally. *BMC Infectious Diseases*. 2021;21(1):1152.
110. Nourollahpour Shiadeh M, Esfandyari S, Ashrafmansouri M, Mirzapour A, Taghipour A, Spotin A, et al. The prevalence of latent and acute toxoplasmosis in HIV-infected pregnant women: A systematic review and meta-analysis. *Microb Pathog* 2020;149(1096-1208 (Electronic)):104549.
111. Newman KL, Leon JS, Rebolledo PA, Scallan E. The impact of socioeconomic status on foodborne illness in high-income countries: a systematic review. *Epidemiology & Infection*. 2015;143(12):2473-85.
112. Rodrigo C, Rajapakse S. HIV, poverty and women. *International Health*. 2010;2(1):9-16.
113. Coffey PM, Ralph AP, Krause VL. The role of social determinants of health in the risk and prevention of group A streptococcal infection, acute rheumatic fever and rheumatic heart disease: A systematic review. *Plos Neglected Tropical Diseases*. 2018;12(6):22.
114. Ding Y, Sun X, Xu Y, Yang L, Zhang Y, Shen Q. Association Between Income and Hepatitis B Seroprevalence: A Systematic Review and Meta-analysis. *Hepat Mon*. 2020;20(10):e104675.
115. Larson HJ, Jarrett C, Eckersberger E, Smith DMD, Paterson P. Understanding vaccine hesitancy around vaccines and vaccination from a global perspective: A systematic review of published literature, 2007-2012. *Vaccine*. 2014;32(19):2150-9.
116. Arat A, Burstrom B, Ostberg V, Hjern A. Social inequities in vaccination coverage among infants and pre-school children in Europe and Australia - a systematic review. *BMC Public Health*. 2019;19(1):290.
117. Forshaw J, Gerver SM, Gill M, Cooper E, Manikam L, Ward H. The global effect of maternal education on complete childhood vaccination: a systematic review and meta-analysis. *BMC Infectious Diseases*. 2017;17(1):801.
118. Bocquier A, Ward J, Raude J, Peretti-Watel P, Verger P. Socioeconomic differences in childhood vaccination in developed countries: a systematic review of quantitative studies. *Expert Review of Vaccines*. 2017;16(11):1107-18.
119. Lucyk K, Simmonds KA, Lorenzetti DL, Drews SJ, Svenson LW, Russell ML. The association between influenza vaccination and socioeconomic status in high income countries varies by the measure used: a systematic review. *BMC Medical Research Methodology*. 2019;19(1):153.

- 1  
2  
3 120. Di Gennaro F, Pizzol D, Cebola B, Stubbs B, Monno L, Saracino A, et al. Social  
4 determinants of therapy failure and multi drug resistance among people with tuberculosis: A review.  
5 2017(1873-281X (Electronic)).  
6  
7 121. Najafizada M, Rahman A, Taufique Q, Sarkar A. Social determinants of multidrug-resistant  
8 tuberculosis: A scoping review and research gaps. *Indian J Tuberc* 2021;68(1):99-105.  
9  
10 122. Salgado-Barreira A, Estany-Gestal A, Figueiras A. [Effect of socioeconomic status on  
11 mortality in urban areas: a systematic critical review]. *Cadernos de Saude Publica*. 2014;30(8):1609-  
12 21.  
13  
14 123. Vukovic V, Lillini R, Lupi S, Fortunato F, Cicconi M, Matteo G, et al. Identifying people at  
15 risk for influenza with low vaccine uptake based on deprivation status: a systematic review.  
16 *European Journal of Public Health*. 2020;30(1):132-41.  
17  
18  
19  
20  
21  
22  
23  
24  
25  
26  
27  
28  
29  
30  
31  
32  
33  
34  
35  
36  
37  
38  
39  
40  
41  
42  
43  
44  
45  
46  
47  
48  
49  
50  
51  
52  
53  
54  
55  
56  
57  
58  
59  
60

For peer review only

Figure 1: PRISMA flow diagram for study selection



only

| Dimension of inequalities                                                                        | Variables                                           | Tuberculosis              | HIV | STI | Hepatitis C | Vaccination | AMR/multi-drug resistance | Others |
|--------------------------------------------------------------------------------------------------|-----------------------------------------------------|---------------------------|-----|-----|-------------|-------------|---------------------------|--------|
| Protected characteristics                                                                        | Age                                                 | 2                         | 3   | 4   | 3           | 13          | 4                         | 19     |
|                                                                                                  | Sex                                                 | 2                         | 7   | 4   | 3           | 5           | 2                         | 11     |
|                                                                                                  | Marriage and civil partnership                      | 0                         | 0   | 0   | 0           | 6           | 0                         | 0      |
|                                                                                                  | Pregnancy and maternity                             | 0                         | 0   | 0   | 2           | 0           | 0                         | 3      |
|                                                                                                  | Race (or ethnicity)                                 | 3                         | 2   | 1   | 0           | 11          | 1                         | 1      |
|                                                                                                  | Religion or belief                                  | 0                         | 0   | 0   | 0           | 5           | 0                         | 1      |
|                                                                                                  | Sexual orientation                                  | 0                         | 4   | 0   | 2           | 0           | 1                         | 4      |
|                                                                                                  | Gender reassignment                                 | 0                         | 1   | 0   | 0           | 0           | 0                         | 1      |
|                                                                                                  | Disability                                          | 0                         | 0   | 0   | 0           | 0           | 0                         | 1      |
| Inclusion Health Groups                                                                          | Vulnerable migrants                                 | 0                         | 1   | 1   | 2           | 2           | 1                         | 3      |
|                                                                                                  | General migrants                                    | 5                         | 8   | 4   | 5           | 5           | 2                         | 6      |
|                                                                                                  | People experiencing homelessness and rough sleeping | 3                         | 2   | 0   | 2           | 0           | 1                         | 3      |
|                                                                                                  | People who engage in sex work                       | 0                         | 4   | 2   | 0           | 1           | 0                         | 2      |
|                                                                                                  | Gypsy Roma/ Traveller communities/Indigenous people | 2                         | 0   | 0   | 0           | 1           | 0                         | 0      |
|                                                                                                  | Socioeconomic inequalities                          | Level of education/income | 1   | 4   | 1           | 0           | 18                        | 3      |
| Employment/occupation                                                                            |                                                     | 1                         | 2   | 2   | 1           | 10          | 0                         | 5      |
| Social class/Area level socioeconomic status                                                     |                                                     | 0                         | 1   | 0   | 0           | 11          | 0                         | 1      |
| Deprivation                                                                                      |                                                     | 1                         | 0   | 1   | 0           | 4           | 0                         | 2      |
| Residence/living situation (e.g living in a home environment with moisture damage, house tenure) |                                                     | 2                         | 0   | 0   | 0           | 7           | 2                         | 10     |

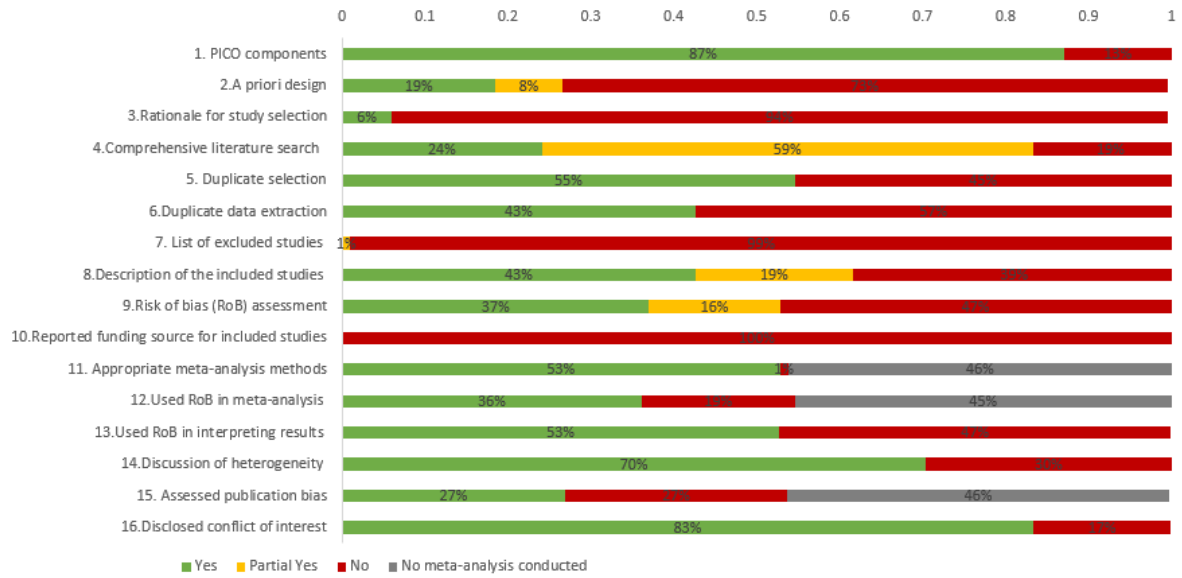

peer review only

**Online supplemental file 1: SEARCH STRATEGY****Searched Ovid MEDLINE(R) ALL 1946 to November 23, 2021 on 24/11/2021**

Search terms for systematic reviews found at

<http://extranet.santecom.gc.ca/wiki/!biblio3s/doku.php?id=concepts:revues-de-la-litterature-et-meta-analyses>

|    | Search                                           | Result  |
|----|--------------------------------------------------|---------|
| 1  | inequality.mp. or Socioeconomic Factors/         | 183584  |
| 2  | inequalities.mp.24364                            |         |
| 3  | protected characteristics.mp. 10                 |         |
| 4  | inclusion health groups.mp. 3                    |         |
| 5  | Homeless Persons/ or homeless.mp. 12922          |         |
| 6  | migrant\$.mp. or "Transients and Migrants"/      | 26370   |
| 7  | Sex Work/ or Sex Workers/ or sex work*.mp. 10781 |         |
| 8  | Gypsy roma.mp. 18                                |         |
| 9  | Human immunodeficiency virus/                    | 21059   |
| 10 | acquired immune deficiency syndrome/             | 77137   |
| 11 | infection/                                       | 40269   |
| 12 | tuberculosis/                                    | 108757  |
| 13 | parasitosis/                                     | 0       |
| 14 | hepatitis/                                       | 22837   |
| 15 | Vaccination/                                     | 90391   |
| 16 | Immunization/                                    | 52361   |
| 17 | Communicable Disease/                            | 31146   |
| 18 | infectious disease.ti,ab,kw.                     | 39865   |
| 19 | infection.ti,ab,kw.                              | 1211775 |
| 20 | tuberculosis.ti,ab,kw.                           | 203159  |
| 21 | hiv.ti,ab,kw.                                    | 331192  |
| 22 | aids.ti,ab,kw.                                   | 156336  |
| 23 | hepatitis.ti,ab,kw.                              | 228655  |
| 24 | "immuni*".ti,ab,kw.                              | 342218  |
| 25 | "vaccin*".ti,ab,kw.                              | 354100  |
| 26 | Communicable disease.ti,ab,kw.                   | 4291    |

1  
2  
3 27 Parasitic disease.ti,ab,kw. 3780  
4  
5 28 infectious disease\$.mp. or Communicable Diseases/ 145081  
6  
7 29 (((systematic or state-of-the-art or scoping or literature or umbrella) adj (review\* or  
8 overview\* or assessment\*)) or "review\* of reviews" or meta-analy\* or metaanaly\* or ((systematic or  
9 evidence) adj1 assess\*) or "research evidence" or metasynthe\* or meta-synthe\*).tw. or exp Review  
10 Literature as Topic/ or exp Review/ or Meta-Analysis as Topic/ or Meta-Analysis/ or "systematic  
11 review"/ 3165549  
12  
13 30 1 or 2 or 3 or 4 or 5 or 6 or 7 or 8 240954  
14  
15 31 9 or 10 or 11 or 12 or 13 or 14 or 15 or 16 or 17 or 18 or 19 or 20 or 21 or 22 or 23 or 24 or  
16 25 or 26 or 27 or 28 2364192  
17  
18 32 30 and 31 32588  
19  
20 33 29 and 32 2822  
21  
22 34 social class.mp. or social class/ 48149  
23  
24 35 poverty.mp. or poverty/ 65773  
25  
26 36 income.mp. or income/ 162454  
27  
28 37 educational status.mp. or educational status/ 58473  
29  
30 38 economic status.mp. or economic status/ 15731  
31  
32 39 travellers.mp. 4716  
33  
34 40 rough sleeping.mp. 23  
35  
36 41 homelessness/ 8802  
37  
38 42 30 or 34 or 35 or 36 or 37 or 38 or 39 or 40 or 41 476015  
39  
40 43 sexually transmitted disease/ or STI.mp. 32214  
41  
42 44 AMR.mp. 5408  
43  
44 45 antimicrobial resistance.mp. or antibiotic resistance/ 85277  
45  
46 46 anti-microbial resistance.mp. 196  
47  
48 47 31 or 43 or 44 or 45 or 46 2444675  
49  
50 48 42 and 47 62612  
51  
52 49 29 and 48 8144  
53  
54 50 limit 49 to yr="2000 -Current" 7318  
55  
56  
57  
58  
59  
60



**Embase Classic+Embase 1947 to 2021 November 23 searched on 24/11/2021**

| Searches                                           | Results |
|----------------------------------------------------|---------|
| 1 inequality.mp. or Socioeconomic Factors/         | 159438  |
| 2 inequalities.mp.26580                            |         |
| 3 protected characteristics.mp. 18                 |         |
| 4 inclusion health groups.mp. 3                    |         |
| 5 Homeless Persons/ or homeless.mp. 12270          |         |
| 6 migrant\$.mp. or "Transients and Migrants"/      | 59556   |
| 7 Sex Work/ or Sex Workers/ or sex work*.mp. 14114 |         |
| 8 Gypsy roma.mp. 22                                |         |
| 9 Human immunodeficiency virus/                    | 125500  |
| 10 acquired immune deficiency syndrome/            | 136979  |
| 11 infection/                                      | 402825  |
| 12 tuberculosis/                                   | 162052  |
| 13 parasitosis/                                    | 24410   |
| 14 hepatitis/                                      | 67370   |
| 15 Vaccination/                                    | 179733  |
| 16 Immunization/                                   | 117275  |
| 17 Communicable Disease/                           | 34287   |
| 18 infectious disease.ti,ab,kw.                    | 50469   |
| 19 infection.ti,ab,kw.                             | 1631799 |
| 20 tuberculosis.ti,ab,kw.                          | 245043  |
| 21 hiv.ti,ab,kw.                                   | 426227  |
| 22 aids.ti,ab,kw.                                  | 190986  |
| 23 hepatitis.ti,ab,kw.                             | 334114  |
| 24 "immuni*" .ti,ab,kw.                            | 440252  |
| 25 "vaccin*" .ti,ab,kw.                            | 438145  |
| 26 Communicable disease.ti,ab,kw.                  | 5111    |
| 27 Parasitic disease.ti,ab,kw.                     | 4822    |

1  
2  
3 28 infectious disease\$.mp. or Communicable Diseases/ 150812  
4  
5 29 1 or 2 or 3 or 4 or 5 or 6 or 7 or 8 254578  
6  
7 30 9 or 10 or 11 or 12 or 13 or 14 or 15 or 16 or 17 or 18 or 19 or 20 or 21 or 22 or 23 or 24 or  
8 25 or 26 or 27 or 28 3242281  
9  
10 31 29 and 30 37750  
11  
12 32 (((systematic or state-of-the-art or scoping or literature or umbrella) adj (review\* or  
13 overview\* or assessment\*)) or "review\* of reviews" or meta-analy\* or metaanaly\* or ((systematic or  
14 evidence) adj1 assess\*) or "research evidence" or metasynthe\* or meta-synthe\*).tw. or systematic  
15 review/ or "systematic review (topic)"/ or meta analysis/ or "meta analysis (topic)"/ 713296  
16  
17 33 31 and 32 1343  
18  
19 34 social class.mp. or social class/ 40328  
20  
21 35 poverty.mp. or poverty/ 64722  
22  
23 36 income.mp. or income/ 221004  
24  
25 37 educational status.mp. or educational status/ 90042  
26  
27 38 economic status.mp. or economic status/ 23383  
28  
29 39 travellers.mp. 6111  
30  
31 40 rough sleeping.mp. 30  
32  
33 41 homelessness/ 12187  
34  
35 42 29 or 34 or 35 or 36 or 37 or 38 or 39 or 40 or 41 588825  
36  
37 43 sexually transmitted disease/ or STI.mp. 62753  
38  
39 44 AMR.mp. 9242  
40  
41 45 antimicrobial resistance.mp. or antibiotic resistance/ 188533  
42  
43 46 anti-microbial resistance.mp. 289  
44  
45 47 30 or 43 or 44 or 45 or 46 3400990  
46  
47 48 32 and 42 and 47 4243  
48  
49 49 limit 48 to yr="2000 -Current" 4212  
50  
51  
52  
53  
54  
55  
56  
57  
58  
59  
60

1  
2  
3  
4  
5 **Searched Web of Science on 24/11/2021 (Web of Science Core Collection)**  
6  
7  
8

9 *Inequalities related terms searched in topics and combined with title search for infectious diseases.*  
10 *This makes the search capture inequality related articles where inequalities are not necessarily*  
11 *mentioned in the title. Had to limit the infectious diseases to titles in order to focus on relevant*  
12 *papers.*  
13

|    |                                                                                                                                                                                                                                                                                                                                                                                                                                         |        |
|----|-----------------------------------------------------------------------------------------------------------------------------------------------------------------------------------------------------------------------------------------------------------------------------------------------------------------------------------------------------------------------------------------------------------------------------------------|--------|
| #1 | (inequalities OR inequality OR "Socioeconomic Factor" OR "protected characteristics" OR inclusion health groups OR "Homeless Person*" OR homelessness OR Transients OR Migrant* OR "Sex Work*" OR "Gypsy roma" OR "rough sleeping" OR traveller* OR "traveller community" OR "traveller communities" OR "economic status" OR "educational status" OR income OR poverty OR "social class") (Topic) and Review (Document Type)            | 53,359 |
| #2 | ("Human immunodeficiency virus" OR HIV OR "acquired immune deficiency syndrome" OR AIDS OR infection OR tuberculosis OR parasitosis OR hepatitis OR vaccination OR immunization OR "communicable disease*" OR "infectious disease*" OR "parasitic disease*" OR "sexually transmitted diseas*" OR STI OR AMR OR "antimicrobial resistance" OR "anti-microbial resistance" OR "antibiotic resistance") (Title) and Review (Document Type) | 64,026 |
| #3 | #1 AND #2<br>Timespan: 2000-01-01 to 2021-11-24 (Publication Date)                                                                                                                                                                                                                                                                                                                                                                      | 3,038  |

31  
32  
33  
34  
35  
36  
37 **Searched Opengrey on 24112021**  
38  
39  
40

41 (inequalities OR inequality OR "Socioeconomic Factor" OR "protected characteristics" OR inclusion  
42 health groups OR "Homeless Person\*" OR homelessness OR Transients OR Migrant\* OR "Sex Work\*"  
43 OR "Gypsy roma" OR "rough sleeping" OR traveller\* OR "traveller community" OR "traveller  
44 communities" OR "economic status" OR "educational status" OR income OR poverty OR "social  
45 class") AND ("Human immunodeficiency virus" OR HIV OR "acquired immune deficiency syndrome"  
46 OR AIDS OR infection OR tuberculosis OR parasitosis OR hepatitis OR vaccination OR immunization  
47 OR "communicable disease\*" OR "infectious disease\*" OR "parasitic disease\*" OR "sexually  
48 transmitted diseas\*" OR STI OR AMR OR "antimicrobial resistance" OR "anti-microbial resistance" OR  
49 "antibiotic resistance")  
50  
51  
52

53 **145** articles retrieved with the search  
54  
55  
56  
57  
58  
59  
60

## Online supplementary file 2: Characteristics of Included Reviews

| Study ID<br>(Author, Year)      | Corresponding<br>Author's Country | Infectious diseases                                       | Search period    | Includes<br>meta-<br>analysis<br>(Yes/No) | Number of studies<br>included ( <i>Number of<br/>UK studies</i> ) | Publication<br>year range for<br>included<br>studies | Protected<br>characteristics | Socioeconomic<br>inequalities | Inclusion<br>health<br>groups |
|---------------------------------|-----------------------------------|-----------------------------------------------------------|------------------|-------------------------------------------|-------------------------------------------------------------------|------------------------------------------------------|------------------------------|-------------------------------|-------------------------------|
| Abraha, 2018 <sup>58</sup>      | Switzerland                       | AMR-Gonorrhoea                                            | 1946-2017        | No                                        | 24 (unclear)                                                      | 1989-2017                                            | ✓                            | ✓                             |                               |
| Adams, 2018 <sup>75</sup>       | UK                                | Gastrointestinal Infection                                | 1980 - 2015      | Yes                                       | 77 (unclear)                                                      | 1995-2015                                            | ✓                            | ✓                             |                               |
| Aldridge, 2018 <sup>46</sup>    | UK                                | Not specified                                             | 2005- 2015       | Yes                                       | 337 (unclear)                                                     | not reported                                         | ✓                            |                               | ✓                             |
| Alividza, 2018 <sup>47</sup>    | UK                                | AMR                                                       | no date limit    | No                                        | 19 (at least 2)                                                   | 1998 to 2015                                         |                              | ✓                             |                               |
| Arat, 2019 <sup>116</sup>       | Sweden                            | Vaccination                                               | not reported     | No                                        | 15 (2)                                                            | 2007-2017                                            |                              | ✓                             |                               |
| Arum, 2021 <sup>50</sup>        | UK                                | HIV, HCV                                                  | 2000 - 2017      | Yes                                       | 37 (6)                                                            | 2000 – 2019                                          |                              |                               | ✓                             |
| Badri, 2021 <sup>93</sup>       | Iran                              | Ocular toxocariasis                                       | 1966 - 2019      | Yes                                       | 101 (4)                                                           | 1966 - 2020                                          | ✓                            |                               |                               |
| Behera, 2018 <sup>76</sup>      | India                             | HIV                                                       | Not reported     | No                                        | Not reported                                                      | 1989 - 2017                                          | ✓                            |                               |                               |
| Beijer, 2012 <sup>48</sup>      | UK                                | TB, HCV virus, and HIV                                    | 1980 - 2012      | Yes                                       | 43 (4)                                                            | 1984 - 2011                                          | ✓                            | ✓                             | ✓                             |
| Bocquier 2017 <sup>118</sup>    | France                            | Vaccination                                               | 2000 - 2016      | No                                        | 43 (5)                                                            | Not reported                                         |                              | ✓                             |                               |
| Bonten, 2020 <sup>77</sup>      | Netherlands                       | <i>Escherichia coli</i> bacteraemia                       | 2007- 2018       | Yes                                       | 210 (21)                                                          | 2007-2018                                            | ✓                            |                               |                               |
| Chan, 2017 <sup>18</sup>        | Australia                         | TB                                                        | Inception- 2017  | Yes                                       | 20 (1)                                                            | 1990-2015                                            |                              |                               | ✓                             |
| Chen, 2019 <sup>70</sup>        | China                             | HIV disease                                               | unclear - 2019   | Yes                                       | 101 (1)                                                           | 1984-2017                                            | ✓                            |                               |                               |
| Chernet, 2017 <sup>14</sup>     | Switzerland                       | Six selected infectious diseases                          | not reported     | Yes                                       | 96 (unclear)                                                      | 2000-2017                                            |                              |                               | ✓                             |
| Coffey, 2018 <sup>113</sup>     | Australia                         | Group A Streptococcal infection,<br>acute rheumatic fever | Unclear - 2016   | No                                        | 91 (unclear)                                                      | 1944 - 2016                                          |                              | ✓                             |                               |
| Colledge, 2020 <sup>74</sup>    | Australia                         | HCV                                                       | not reported     | No                                        | 223 (16)                                                          | 2008 -2017                                           | ✓                            | ✓                             |                               |
| Cormier, 2019 <sup>44</sup>     | Canada                            | TB/HIV                                                    | 1980 - 2017.     | No                                        | 475 (0)                                                           | 1984-2017                                            | ✓                            | ✓                             | ✓                             |
| Crichton, 2015 <sup>78</sup>    | UK                                | Genital chlamydia infection                               | Inception - 2014 | Yes                                       | 36 (3)                                                            | not reported                                         | ✓                            | ✓                             |                               |
| De Vito, 2017 <sup>19</sup>     | Denmark                           | Vaccination                                               | 2007- 2017       | No                                        | 35 +21 (4)                                                        | not reported                                         |                              | ✓                             | ✓                             |
| Denning, 2018 <sup>79</sup>     | UK                                | Vulvovaginal candidiasis                                  | 1985 - 2016      | Yes                                       | 8 (2)                                                             | 2000-2013                                            | ✓                            |                               |                               |
| Di Gennaro, 2017 <sup>120</sup> | Mozambique                        | TB - MDR                                                  | Inception - 2016 | Yes                                       | 50 (1)                                                            | 1997 - 2016                                          |                              | ✓                             |                               |
| Ding, 2020 <sup>114</sup>       | China                             | HBV                                                       | Inception - 2020 | Yes                                       | 10 (0)                                                            | 1995 - 2019                                          |                              | ✓                             |                               |
| Dong, 2020 <sup>94</sup>        | China                             | Cryptosporidium Infection                                 | 1960 - 2018      | Yes                                       | 221 (unclear)                                                     | Unclear                                              | ✓                            | ✓                             |                               |
| Dugan, 2021 <sup>95</sup>       | USA                               | HCV                                                       | 2000 - 2018      | No                                        | 41 (unclear)                                                      | Unclear                                              | ✓                            |                               |                               |
| Eilami, 2019 <sup>104</sup>     | Iran                              | HIV/AIDS                                                  | 2010 - 2017      | Yes                                       | 54 (unclear)                                                      | 2010-2017                                            | ✓                            |                               |                               |
| Fakoya, 2015 <sup>71</sup>      | UK                                | HIV                                                       | 2002- 2014       | No                                        | 27 (9)                                                            | 2003-2014                                            | ✓                            |                               |                               |
| Falagas, 2008 <sup>59</sup>     | Greece                            | Vaccination                                               | Not reported     | No                                        | 39 (1)                                                            | 1979-2005                                            | ✓                            | ✓                             |                               |
| Falla, 2018 <sup>20</sup>       | Netherlands                       | Chronic HCV                                               | 2000-2015        | No                                        | Part 1: 18 (unclear)<br>Part 2: 56 (1)                            |                                                      |                              |                               | ✓                             |
| Faria, 2021 <sup>96</sup>       | Brazil                            | Vaccination                                               | Inception-2020   | Yes                                       | 31 (0)                                                            | 2001 -2020                                           | ✓                            | ✓                             |                               |
| Fauroux, 2017 <sup>105</sup>    | Spain                             | Respiratory Syncytial Virus                               | 1995 - 2015      | No                                        | 74 (8)                                                            | Unclear                                              | ✓                            | ✓                             |                               |
| Faustini, 2005 <sup>21</sup>    | Italy                             | TB (MDR)                                                  | 1993-2003        | Yes                                       | 29 (3)                                                            | 1995-2005                                            | ✓                            |                               | ✓                             |
| Fernández, 2015 <sup>60</sup>   | Denmark                           | Vaccination: HPV                                          | not reported     | No                                        | 23(8)                                                             | 2008-2014                                            | ✓                            | ✓                             |                               |
| Fisher, 2013 <sup>61</sup>      | UK                                | Vaccination: HPV                                          | Inception- 2012  | Yes                                       | 27(1)                                                             | 2008-2012                                            | ✓                            | ✓                             |                               |
| Forshaw, 2017 <sup>117</sup>    | UK                                | Vaccination                                               | 1990 - 2016      | Yes                                       | 37(0)                                                             | 1990- 2015                                           | ✓                            | ✓                             |                               |
| Fournet, 2018 <sup>8</sup>      | Netherlands                       | Vaccination                                               | 1950- 2013       | No                                        | 48/15 (at least 1)                                                | not reported                                         | ✓                            |                               | ✓                             |
| Ghiasvand, 2020 <sup>80</sup>   | Iran                              | HIV/AIDS                                                  | Inception - 2017 | Yes                                       | 19 (0)                                                            | 2005 - 2017                                          | ✓                            | ✓                             |                               |
| Gorjana, 2017 <sup>62</sup>     | Australia                         | HPV Vaccination                                           | Unclear - 2015   | No                                        | 18 (1)                                                            | 2010 - 2015                                          | ✓                            |                               |                               |

1  
2  
3  
4  
5  
6  
7  
8  
9  
10  
11  
12  
13  
14  
15  
16  
17  
18  
19  
20  
21  
22  
23  
24  
25  
26  
27  
28  
29  
30  
31  
32  
33  
34  
35  
36  
37  
38  
39  
40  
41  
42  
43  
44  
45  
46

| Study ID (Author, Year)                    | Corresponding Author's Country | Infectious diseases           | Search period    | Includes meta-analysis (Yes/No) | Number of studies included (Number of UK studies) | Publication year range for included studies | Protected characteristics | Socioeconomic inequalities | Inclusion health groups |
|--------------------------------------------|--------------------------------|-------------------------------|------------------|---------------------------------|---------------------------------------------------|---------------------------------------------|---------------------------|----------------------------|-------------------------|
| Greenaway, 2015 <sup>22</sup>              | Canada                         | HCV                           | not reported     | Yes                             | 50(0)                                             | 1990-2013                                   | ✓                         | ✓                          | ✓                       |
| Hahne, 2013 <sup>24</sup>                  | The Netherlands                | HBV and HCV                   | 2000 - 2009      | No                              | 124 (9)                                           | Unclear                                     | ✓                         |                            | ✓                       |
| Hermann, 2019 <sup>81</sup>                | Canada                         | Vaccination                   | 2000- 2017       | No                              | 33 (15)                                           | 2001-2016                                   | ✓                         |                            |                         |
| Jackson, 2021 <sup>38</sup>                | Ireland                        | Tuberculosis and MDR-TB       | Unclear - 2020   | Yes                             | 32 (3)                                            | 2010 - 2018                                 |                           |                            | ✓                       |
| Jain, 2017 <sup>25</sup>                   | UK                             | Vaccination                   | not reported     | Yes                             | 35 (5)                                            | 1997 and 2015                               | ✓                         | ✓                          | ✓                       |
| Jin, 2020 <sup>72</sup>                    | Australia                      | HCV                           | 2000 - 2019      | Yes                             | 194 (at least 14)                                 | Unclear                                     |                           |                            | ✓                       |
| Kabapy, 2020 <sup>39</sup>                 | Egypt                          | HIV                           | 1982 - 2018      | Yes                             | 231 (unclear)                                     | Unclear                                     | ✓                         | ✓                          | ✓                       |
| Kawatsu, 2014 <sup>26</sup>                | Japan                          | TB                            | Not reported     | No                              | 18 (1)                                            | 1997 - 2012                                 | ✓                         | ✓                          | ✓                       |
| Kentikelenis, 2015 <sup>27</sup>           | UK                             | Various                       | 2007 - 2014      | No                              | 21 (unclear)                                      | not reported                                |                           | ✓                          | ✓                       |
| Lafond, 2021 <sup>97</sup>                 | USA                            | Influenza-associated lower    | 1996–2016        | Yes                             | 75 (Unclear)                                      | 1996 - 2016                                 | ✓                         |                            |                         |
| Larson, 2014 <sup>115</sup>                | UK                             | Vaccination                   | unclear - 2012   | No                              | 1164 (at least one)                               | 2007–2012                                   |                           | ✓                          |                         |
| Leumi, 2020 <sup>56</sup>                  | Cameroon                       | Hepatitis B                   | 1990 - 2017      | Yes                             | 358 (unclear)                                     | Unclear                                     | ✓                         |                            | ✓                       |
| Leung, 2019 <sup>106</sup>                 | Australia                      | HIV, HBV, HCV                 | 2008 - 2017      | Yes                             | 104(unclear)                                      | not reported                                | ✓                         |                            |                         |
| Li, P. 2020 <sup>82</sup>                  | Netherlands                    | HEV                           | inception - 2019 | Yes                             | 419(7)                                            | not reported                                | ✓                         | ✓                          |                         |
| Lindsay, 2015 <sup>83</sup>                | Belgium                        | Norovirus disease             | 2003 - 2013      | No                              | 39 (4)                                            | not reported                                | ✓                         |                            |                         |
| Lucyk, 2019 <sup>119</sup>                 | Canada                         | Vaccination- Influenza        | 2012 - 2017      | No                              | 42 (1)                                            | 2012- 2017                                  |                           | ✓                          |                         |
| Ly, 2021 <sup>51</sup>                     | France                         | Various                       | 1980 - 2020      | No                              | 81 (4)                                            | Unclear                                     | ✓                         | ✓                          | ✓                       |
| Macina, 2021 <sup>98</sup>                 | France                         | Bordetella pertussis          | 1990 - 2019      | No                              | 88 (7)                                            | Unclear                                     | ✓                         |                            |                         |
| Malerba, 2015 <sup>63</sup>                | Italy                          | Vaccination                   | 2000 - 2014      | No                              | 11 (1)                                            | 2003-2014                                   | ✓                         | ✓                          |                         |
| McBride, 2021 <sup>40</sup>                | Canada                         | HIV/STI                       | 2009 - 2019      | No                              | 29 (unclear)                                      | Not reported                                | ✓                         |                            | ✓                       |
| Millett, 2012 <sup>64</sup>                | USA                            | HIV disease                   | 1981 - 2011      | Yes                             | 194 (13)                                          | 1981-2011                                   | ✓                         | ✓                          |                         |
| Mipatrini, 2017 <sup>28</sup>              | Italy                          | Vaccination                   | 2005-2016        | No                              | 58 (7)                                            | not reported                                |                           |                            | ✓                       |
| Mirzadeh, 2021 <sup>99</sup>               | Iran                           | Trichomonas vaginalis         | 1985 - 2020.     | Yes                             | 85 (2)                                            | 1985 - 2020                                 | ✓                         |                            |                         |
| Morais, 2017 <sup>29</sup>                 | Portugal                       | <i>Helicobacter pylori</i>    | inception - 2015 | No                              | 28 (unclear)                                      | 1988-2014                                   |                           |                            | ✓                       |
| Nagata, 2013 <sup>65</sup>                 | Switzerland                    | vaccination- Influenza        | 1980 - 2011      | No                              | 80 (7)                                            | not reported                                | ✓                         | ✓                          |                         |
| Najafizada, 2020 <sup>121</sup>            | Canada                         | MDR-TB                        | 1998-2018        | No                              | 15(4)                                             | Not reported                                |                           | ✓                          |                         |
| Nava-Aguilera, 2009 <sup>49</sup>          | Mexico                         | TB                            | unclear - 2005   | Yes                             | 30 (1)                                            | 1994 - 2008                                 | ✓                         | ✓                          | ✓                       |
| Nellums, 2018b <sup>42</sup>               | UK                             | AMR                           | 2000- 2017       | Yes                             | 23 (0)                                            | 2006-2016                                   |                           |                            | ✓                       |
| Newman, 2015 <sup>111</sup>                | USA                            | Foodborne infectious diseases | 1980 - 2013      | No                              | 16 (3)                                            | not reported                                | ✓                         | ✓                          |                         |
| Nourollahpour Shiadeh, 2020 <sup>110</sup> | Iran                           | Toxoplasmosis                 | Inception -2020  | Yes                             | 14 (0)                                            | 2001- 2019                                  | ✓                         |                            |                         |
| Offer, 2015 <sup>66</sup>                  | UK                             | TB                            | 1990 - unclear   | No                              | 18 (18)                                           | 1999-2013                                   | ✓                         | ✓                          |                         |
| Okoli, 2020 <sup>30</sup>                  | Canada                         | Influenza vaccination         | Unclear - 2020   | Yes                             | 34 (1)                                            | 2004 - 2019                                 | ✓                         | ✓                          | ✓                       |
| Okoli, 2021 <sup>69</sup>                  | Canada                         | Influenza vaccination         | 2000 - 2020      | Yes                             | 36 (2)                                            | 2010-2020                                   | ✓                         | ✓                          |                         |
| Oldenburg, 2014 <sup>73</sup>              | USA                            | HIV                           | 2004 - 2013      | Yes                             | 88 (1)                                            | not reported                                | ✓                         |                            | ✓                       |
| Oldenburg, 2015 <sup>52</sup>              | USA                            | HIV                           | 2004 - 2013,     | Yes                             | 33 (0)                                            | 2004-2013                                   |                           |                            | ✓                       |
| Operario, 2008 <sup>53</sup>               | UK                             | HIV                           | 1980-2007        | Yes                             | 25 (0)                                            | 1988- 2006.                                 | ✓                         |                            | ✓                       |
| Pega 2021 <sup>41</sup>                    | Switzerland,                   | HIV                           | 2010- 2020       | Yes                             | 19(1)                                             | 2010-2019                                   |                           |                            | ✓                       |

| Study ID<br>(Author, Year)              | Corresponding<br>Author's Country | Infectious diseases        | Search period    | Includes<br>meta-<br>analysis<br>(Yes/No) | Number of studies<br>included ( <i>Number of<br/>UK studies</i> ) | Publication<br>year range for<br>included<br>studies | Protected<br>characteristics | Socioeconomic<br>inequalities | Inclusion<br>health<br>groups |
|-----------------------------------------|-----------------------------------|----------------------------|------------------|-------------------------------------------|-------------------------------------------------------------------|------------------------------------------------------|------------------------------|-------------------------------|-------------------------------|
| Platt, 2013a <sup>31</sup>              | UK                                | HIV, STIs                  | Not reported     | No                                        | 26 (1)                                                            | Not reported                                         |                              |                               | ✓                             |
| Platt, 2013b <sup>32</sup>              | UK                                | HIV, STIs                  | 2005 - 2011      | No                                        | 73 (5)                                                            | Not reported                                         |                              |                               | ✓                             |
| Possenti, 2016 <sup>84</sup>            | Italy                             | Cystic Echinococcosis      | not reported     | Yes                                       | 37(0)                                                             | 1964-2014                                            | ✓                            | ✓                             |                               |
| Prost, 2007 <sup>33</sup>               | UK                                | HIV                        | Unknown - 2005   | No                                        | 138 (unclear)                                                     | 1996 -2005                                           | ✓                            |                               | ✓                             |
| Pulver, 2016 <sup>107</sup>             | Canada                            | Vaccination                | 1980 - 2014      | No                                        | 12 (1)                                                            | 1993 - 2013                                          | ✓                            |                               | ✓                             |
| Richterman, 2018 <sup>85</sup>          | USA                               | Cholera                    | not reported     | Yes                                       | 110 (0)                                                           | 1974-2017                                            | ✓                            | ✓                             |                               |
| Rodrigo, 2010 <sup>112</sup>            | Sri Lanka                         | HIV                        | 1999 -2009       | No                                        | 98 (unclear)                                                      | not reported                                         |                              | ✓                             |                               |
| Roller-Wirnsberger, 2021 <sup>100</sup> | Austria                           | Influenza vaccination      | 2012- 2019       | No                                        | 44 (at least 1)                                                   | 2012-2018                                            | ✓                            | ✓                             |                               |
| Rossi, 2012 <sup>34</sup>               | Canada                            | HBV                        | Inception - 2011 | Yes                                       | 110 (2)                                                           | 1977 - 2011                                          |                              |                               | ✓                             |
| Rostami, 2019a <sup>87</sup>            | Iran                              | Toxocariasis               | 1980 - 2019      | Yes                                       | 250 (2)                                                           | 1980 -2019                                           | ✓                            | ✓                             |                               |
| Rostami, 2019b <sup>86</sup>            | Iran                              | Acute Toxoplasma infection | 1988 - 2018      | Yes                                       | 217 (3)                                                           | 1988 - 2018                                          | ✓                            |                               |                               |
| Rostami, 2021 <sup>101</sup>            | Iran                              | Toxoplasmosis              | 1980-2020        | Yes                                       | 150 (2)                                                           | 1987-2020                                            | ✓                            | ✓                             |                               |
| Salgado-Barreira, 2014 <sup>122</sup>   | Spain                             | HIV                        | unclear -2012    | No                                        | 24 (1)                                                            | 1983- 2010                                           |                              | ✓                             |                               |
| Sandgren, 2014 <sup>23</sup>            | Sweden                            | TB                         | 1990- 2012       | Yes                                       | 15 (1)                                                            | not reported                                         |                              |                               | ✓                             |
| Schepisi, 2018 <sup>88</sup>            | Italy                             | TB                         | unclear - 2017   | Yes                                       | 74 (13)                                                           | 1950-2017                                            | ✓                            |                               |                               |
| Schierhout, 2020 <sup>89</sup>          | Australia                         | HTLV-1                     | 1910 - 2018      | Yes                                       | 39 (0)                                                            | 1991 - 2018                                          | ✓                            |                               |                               |
| Song, 2021 <sup>102</sup>               | China                             | Drug resistant TB (MDR-TB) | 2000-2020        | Yes                                       | 37 (2 at least)                                                   | 2000-2019                                            | ✓                            |                               |                               |
| Spyromitrou-Xioufi, 2020 <sup>90</sup>  | Greece                            | Meningococcal Infection    | 2008 - 2018      | Yes                                       | 6 (0)                                                             | 1999-2017                                            | ✓                            | ✓                             |                               |
| Stockdale, 2020 <sup>54</sup>           | UK                                | HDV                        | 1998 - 2019      | Yes                                       | 282 (at least 1)                                                  | not reported                                         |                              |                               | ✓                             |
| Striffler, 2015 <sup>91</sup>           | Canada                            | Meningococcal Infection    | inception - 2013 | No                                        | 17 (6)                                                            | 1982-2012                                            | ✓                            |                               |                               |
| Suhrcke, 2011 <sup>35</sup>             | UK                                | Various                    | 1947 - 2010      | No                                        | 37 (2)                                                            | not reported                                         |                              | ✓                             | ✓                             |
| Sultana, 2021 <sup>103</sup>            | Bangladesh                        | HIV and MDR-TB             | 2010 - 2020      | Yes                                       | 54 (0)                                                            | 2010 - 2020                                          | ✓                            |                               |                               |
| Tabacchi, 2016 <sup>67</sup>            | Italy                             | Vaccination- MMR           | not reported     | Yes                                       | 45 (19)                                                           | 2000-2014                                            | ✓                            | ✓                             |                               |
| Tauli, 2016 <sup>36</sup>               | Brazil                            | Vaccination                | 1992- 2014       | No                                        | 23(0)                                                             | not reported                                         | ✓                            | ✓                             | ✓                             |
| Tavares, 2017 <sup>37</sup>             | Portugal                          | HIV-TB                     | 2000 - 2016      | No                                        | 27 (2)                                                            | 2003 - 2016                                          |                              |                               | ✓                             |
| Tollefson, 2013 <sup>45</sup>           | USA                               | TB                         | 1990 – 2011      | No                                        | 91 (0)                                                            | 1990 - 2012                                          |                              |                               | ✓                             |
| Van Gerwen, 2020 <sup>108</sup>         | USA                               | STI/HIV                    | 1968 - 2018      | Yes                                       | 25 (0)                                                            | not reported                                         | ✓                            |                               |                               |
| Vet, 2015 <sup>55</sup>                 | The Netherlands                   | Vaccination                | Inception-2014   | No                                        | 18 (0)                                                            | not reported                                         | ✓                            | ✓                             | ✓                             |
| Vukovic, 2019 <sup>123</sup>            | Italy                             | Influenza vaccination      | Unknown - 2017   | No                                        | 12 (6)                                                            | 2004 - 2017                                          |                              | ✓                             |                               |
| Wayal, 2018 <sup>68</sup>               | UK                                | STI                        | Unclear - 2016   | No                                        | 15 (15)                                                           | 2000 - 2017                                          | ✓                            |                               |                               |
| Whelan, 2021 <sup>109</sup>             | The Netherlands                   | Gonorrhoea                 | 2010 - 2019      | No                                        | 174 (1)                                                           | Unclear                                              | ✓                            |                               |                               |
| Wu, 2021 <sup>57</sup>                  | China                             | HPV                        | 1990-2019        | Yes                                       | 107 (0)                                                           | 1989-2019                                            | ✓                            |                               | ✓                             |
| Yu, 2020 <sup>43</sup>                  | USA                               | HIV/STI                    | Unclear - 2019   | No                                        | 21 (0)                                                            | 2008 -2017                                           |                              |                               | ✓                             |
| Zamani, 2018 <sup>92</sup>              | Iran                              | <i>Helicobacter pylori</i> | 2000 - 2017      | Yes                                       | 183 (2)                                                           | not reported                                         | ✓                            |                               |                               |

Online supplemental file 3: EVIDENCE MATRIX

|                           |           | Infectious diseases: Author, year (number of UK studies included) |                                                                    |                                                                               |                                                                     |                                                                                                                                                                                                                                                                                                             |                                                                                                          |                                                                                                                                                                                                                                                                                                                                                                                                                                                |
|---------------------------|-----------|-------------------------------------------------------------------|--------------------------------------------------------------------|-------------------------------------------------------------------------------|---------------------------------------------------------------------|-------------------------------------------------------------------------------------------------------------------------------------------------------------------------------------------------------------------------------------------------------------------------------------------------------------|----------------------------------------------------------------------------------------------------------|------------------------------------------------------------------------------------------------------------------------------------------------------------------------------------------------------------------------------------------------------------------------------------------------------------------------------------------------------------------------------------------------------------------------------------------------|
| Dimension of inequalities | Variables | Tuberculosis                                                      | HIV                                                                | STI                                                                           | Hepatitis C                                                         | immunisation                                                                                                                                                                                                                                                                                                | AMR/multi-drug resistance                                                                                | Other infectious diseases                                                                                                                                                                                                                                                                                                                                                                                                                      |
| Protected characteristics | Age       | Nava-Aguilera, 2009 (1)<br>Schepisi, 2018 (13)                    | Ghiasvand, 2020 (0)<br>Behera, 2018 (unclear)<br>Sultana, 2021 (0) | Crichton, 2015 (3)<br>Denning, 2018 (2)<br>Wu, 2021 (0)<br>Mirzadeh, 2021 (2) | Colledge, 2020 (16)<br>Greenaway, 2015 (0)<br>Dugan, 2021 (unclear) | Vet, 2015 (0)<br>Okoli, 2020 (1)<br>Gorjana, 2017 (1)<br>Fernández, 2015 (8)<br>Tabacchi, 2016 (19)<br>Nagata, 2013 (unclear, at least 1)<br>Falagas, 2008 (1)<br>Hermann, 2019 (15)<br>Tauli, 2016 (0)<br>Malerba, 2015 (1)<br>Okoli, 2021 (2)<br>Roller-Wirnsberger, 2021 (at least 1)<br>Faria, 2021 (0) | Abraha, 2018 (unclear, at least 1)<br>Faustini, 2005 (3)<br>Song, 2021 (at least 2)<br>Sultana, 2021 (0) | Leumi, 2020 (unclear)<br>Macina, 2021 (7)<br>Lafond, 2021 (unclear)<br>Dong, 2020 (unclear)<br>Bonten, 2020 (21)<br>Ly, 2021 (4)<br>Li, 2020 (7)<br>Rostami, 2019a (2)<br>Rostami, 2019b (3)<br>Rostami, 2021 (2)<br>Badri, 2021 (4)<br>Schierhout, 2020 (0)<br>Adams, 2018 (unclear, at least 1)<br>Zamani, 2018 (2)<br>Lindsay, 2015 (4)<br>Possenti, 2016 (0)<br>Richterman, 2018 (0)<br>Strifler, 2015 (6)<br>Spyromitrou-Xioufi, 2020 (0) |

| Dimension of inequalities | Variables                      | Infectious diseases: Author, year (number of UK studies included) |                                                                                                                                                                  |                                                                                           |                                                                  |                                                                                                                                           |                                                          |                                                                                                                                                                                                                                                                                        |
|---------------------------|--------------------------------|-------------------------------------------------------------------|------------------------------------------------------------------------------------------------------------------------------------------------------------------|-------------------------------------------------------------------------------------------|------------------------------------------------------------------|-------------------------------------------------------------------------------------------------------------------------------------------|----------------------------------------------------------|----------------------------------------------------------------------------------------------------------------------------------------------------------------------------------------------------------------------------------------------------------------------------------------|
|                           |                                | Tuberculosis                                                      | HIV                                                                                                                                                              | STI                                                                                       | Hepatitis C                                                      | immunisation                                                                                                                              | AMR/multi-drug resistance                                | Other infectious diseases                                                                                                                                                                                                                                                              |
|                           | Sex                            | Beijer, 2012 (4)<br>Nava-Aguilera, 2009 (1)                       | Beijer, 2012 (0)<br>Operario, 2008 (0)<br>Van Gerwen, 2020 (0)<br>Leung, 2019 (unclear)<br>Eilami, 2019 (1)<br>Kabapy, 2020 (unclear)<br>McBride, 2021 (unclear) | Crichton, 2015 (3)<br>Van Gerwen, 2020 (0)<br>Whelan, 2021 (1)<br>McBride, 2021 (unclear) | Beijer, 2012 (1)<br>Colledge, 2020 (16)<br>Leung, 2019 (unclear) | Pulver, 2016 (1)<br>Tabacchi, 2016 (19)<br>Nagata, 2013 (unclear, at least 1)<br>Roller-Wirnsberger, 2021 (at least 1)<br>Faria, 2021 (0) | Abraha, 2018 (unclear, at least 1)<br>Faustini, 2005 (3) | Leung, 2019 (unclear)<br>Aldridge, 2018 (unclear, at least 1)<br>Ly, 2021 (4)<br>Spyromitrou-Xioufi, 2020 (0)<br>Possenti, 2016 (0)<br>Richterman, 2018 (0)<br>Rostami, 2021 (2)<br>Schierhout, 2020 (0)<br>Fauroux, 2017 (8)<br>Rostami, 2019a (2)<br>Badri, 2021 (4)<br>Li, 2020 (7) |
|                           | Marriage and civil partnership |                                                                   |                                                                                                                                                                  |                                                                                           |                                                                  | Okoli, 2020 (1)<br>Nagata, 2013 (unclear, at least 1)<br>Jain, 2017 (5)<br>Tabacchi, 2016 (19)<br>Okoli, 2021 (2)<br>Faria, 2021 (0)      |                                                          |                                                                                                                                                                                                                                                                                        |
|                           | Pregnancy and maternity        |                                                                   |                                                                                                                                                                  |                                                                                           | Hahne, 2013 (9)<br>Greenaway, 2015 (0)                           |                                                                                                                                           |                                                          | Hahne, 2013 (9)<br>Leumi, 2020 (unclear)                                                                                                                                                                                                                                               |



1  
2  
3  
4  
5  
6  
7  
8  
9  
10  
11  
12  
13  
14  
15  
16  
17  
18  
19  
20  
21  
22  
23  
24  
25  
26  
27  
28  
29  
30  
31  
32  
33  
34  
35  
36  
37  
38  
39  
40  
41  
42  
43  
44  
45  
46

| Dimension of inequalities | Variables           | Infectious diseases: Author, year (number of UK studies included)             |                                                         |                               |             |                                                                                                                                                                                                                                               |                                    |                                 |
|---------------------------|---------------------|-------------------------------------------------------------------------------|---------------------------------------------------------|-------------------------------|-------------|-----------------------------------------------------------------------------------------------------------------------------------------------------------------------------------------------------------------------------------------------|------------------------------------|---------------------------------|
|                           |                     | Tuberculosis                                                                  | HIV                                                     | STI                           | Hepatitis C | immunisation                                                                                                                                                                                                                                  | AMR/multi-drug resistance          | Other infectious diseases       |
|                           |                     |                                                                               |                                                         |                               |             |                                                                                                                                                                                                                                               |                                    | Nourollahpour Shiadeh, 2020 (0) |
|                           | Race (or ethnicity) | Nava-Aguilera, 2009 (1)<br>Offer, 2015 (18) <sup>α</sup><br>Kawatsu, 2014 (1) | Millett, 2012 (13)<br>Prost, 2007 (unclear, at least 3) | Wayal, 2018 (15) <sup>α</sup> |             | Vet, 2015 (0)<br>Okoli, 2020 (1)<br>Gorjana, 2017 (1)<br>Fernández, 2015 (8)<br>Fisher, 2013 (1)<br>Tabacchi, 2016 (19)<br>Nagata, 2013 (unclear, at least 1)<br>Falagas, 2008 (1)<br>Tauli, 2016 (0)<br>Malerba, 2015 (0)<br>Okoli, 2021 (2) | Abraha, 2018 (unclear, at least 1) | Ly, 2021 (4)                    |
|                           | Religion or belief  |                                                                               |                                                         |                               |             | Fisher, 2013 (1)<br>Jain, 2017 (5)<br>Fournet, 2018 (unclear, at least 1)<br>Malerba, 2015 (0)<br>Falagas, 2008 (1)                                                                                                                           |                                    | Spyromitrou-Xioufi, 2020 (0)    |

| Dimension of inequalities | Variables           | Infectious diseases: Author, year (number of UK studies included)                                                |                                                                                                                                   |                                                                                                 |                                                                                                                      |                                                                                                  |                                         |                                                                                                                                                    |
|---------------------------|---------------------|------------------------------------------------------------------------------------------------------------------|-----------------------------------------------------------------------------------------------------------------------------------|-------------------------------------------------------------------------------------------------|----------------------------------------------------------------------------------------------------------------------|--------------------------------------------------------------------------------------------------|-----------------------------------------|----------------------------------------------------------------------------------------------------------------------------------------------------|
|                           |                     | Tuberculosis                                                                                                     | HIV                                                                                                                               | STI                                                                                             | Hepatitis C                                                                                                          | immunisation                                                                                     | AMR/multi-drug resistance               | Other infectious diseases                                                                                                                          |
|                           | Sexual orientation  |                                                                                                                  | Fakoya, 2015 (9)<br>Oldenburg, 2014 (1)<br>Operario, 2008 (0)<br>Chen, 2019 (1)                                                   |                                                                                                 | Hahne, 2013 (9)<br>Jin, 2020 (at least 14)                                                                           |                                                                                                  | Abraha, 2018 (unclear, at least 1)      | Hahne, 2013 (9)<br>Leumi, 2020 (unclear)<br>Ly, 2021 (4)<br>Stockdale, 2020 (unclear, at least 1)                                                  |
|                           | Gender reassignment |                                                                                                                  | Operario, 2008 (0)                                                                                                                |                                                                                                 |                                                                                                                      |                                                                                                  |                                         | Leumi, 2020 (unclear)                                                                                                                              |
|                           | Disability          |                                                                                                                  |                                                                                                                                   |                                                                                                 |                                                                                                                      |                                                                                                  |                                         | Newman, 2015 (3)                                                                                                                                   |
| Inclusion Health Groups   | Vulnerable migrants |                                                                                                                  | Yu, 2020 (0)                                                                                                                      | Yu, 2020 (0)                                                                                    | Chernet, 2017 (unclear)<br>Greenaway, 2015 (0)                                                                       | Mipatrini, 2017 (7)<br>De Vito, 2017 (4)                                                         | Nellums, 2018 (0)                       | Rossi, 2012 (2)<br>Chernet, 2017 (unclear)<br>Mipatrini, 2017 (7)<br>Chernet, 2017 (unclear)                                                       |
|                           | General migrants    | Tavares, 2017 (2) <sup>β</sup><br>Chan, 2017 (1)<br>Kawatsu, 2014 (1)<br>Sandgren, 2014 (1)<br>Jackson, 2021 (3) | Tavares, 2017 (2) <sup>β</sup><br>Platt, 2013a (1)<br>Platt, 2013b (5)<br>Prost, 2007 (unclear, at least 3)<br>Kentikelenis, 2015 | Platt, 2011a (1)<br>Platt, 2013b (5)<br>Kentikelenis, 2015 (unclear)<br>McBride, 2021 (unclear) | Hahne, 2013 (9)<br>Chernet, 2017 (unclear)<br>Greenaway, 2015 (0)<br>Kentikelenis, 2015 (unclear)<br>Falla, 2018 (1) | Okoli, 2020 (1)<br>Mipatrini, 2017 (7)<br>De Vito, 2017 (4)<br>Jain, 2017 (5)<br>Tauli, 2016 (0) | Faustini, 2005 (3)<br>Jackson, 2021 (3) | Rossi, 2012 (2)<br>Hahne, 2013 (9)<br>Chernet, 2017 (unclear)<br>Kentikelenis, 2015 (unclear)<br>Suhrcke, 2011 (unclear)<br>Morais, 2017 (unclear) |

| Dimension of inequalities | Variables                                            | Infectious diseases: Author, year (number of UK studies included) |                                                                                          |                              |                                    |                                     |                                      |                                                                                 |
|---------------------------|------------------------------------------------------|-------------------------------------------------------------------|------------------------------------------------------------------------------------------|------------------------------|------------------------------------|-------------------------------------|--------------------------------------|---------------------------------------------------------------------------------|
|                           |                                                      | Tuberculosis                                                      | HIV                                                                                      | STI                          | Hepatitis C                        | immunisation                        | AMR/multi-drug resistance            | Other infectious diseases                                                       |
|                           |                                                      |                                                                   | (unclear)<br>Pega 2021<br>(1)<br>Kabapy, 2020<br>(unclear)<br>McBride, 2021<br>(unclear) |                              |                                    |                                     |                                      |                                                                                 |
|                           | People experiencing homelessness and rough sleeping  | Beijer, 2012 (4)<br>Nava-Aguilera, 2009 (1)<br>Kawatsu, 2014 (1)  | Beijer, 2012 (0)<br>Arum, 2021 (6)                                                       |                              | Beijer, 2012 (1)<br>Arum, 2021 (6) |                                     | Alividza, 2018 (unclear, at least 2) | Aldridge, 2018 (unclear, at least 1)<br>Suhrcke, 2011 (unclear)<br>Ly, 2021 (4) |
|                           | People who engage in sex work                        |                                                                   | Yu, 2020 (0)<br>Oldenburg, 2015 (0)<br>Operario, 2008 (0)<br>Kabapy, 2020 (unclear)      | Yu, 2020 (0)<br>Wu, 2021 (0) |                                    | Vet, 2015 (0)                       |                                      | Leumi, 2020 (unclear)<br>Stockdale, 2020 (unclear, at least 1)                  |
|                           | Gypsy Roma/ Traveller communities /Indigenous people | Tollefson, 2013 (0)<br>Cormier 2019 (0)                           |                                                                                          |                              |                                    | Fournet, 2018 (unclear, at least 1) |                                      |                                                                                 |

| Dimension of inequalities  | Variables                 | Infectious diseases: Author, year (number of UK studies included) |                                                                                                |                    |             |                                                                                                                                                                                                                                                                                                                                                                                                                       |                                                                                      |                                                                                                                                                                                                                                    |
|----------------------------|---------------------------|-------------------------------------------------------------------|------------------------------------------------------------------------------------------------|--------------------|-------------|-----------------------------------------------------------------------------------------------------------------------------------------------------------------------------------------------------------------------------------------------------------------------------------------------------------------------------------------------------------------------------------------------------------------------|--------------------------------------------------------------------------------------|------------------------------------------------------------------------------------------------------------------------------------------------------------------------------------------------------------------------------------|
|                            |                           | Tuberculosis                                                      | HIV                                                                                            | STI                | Hepatitis C | immunisation                                                                                                                                                                                                                                                                                                                                                                                                          | AMR/multi-drug resistance                                                            | Other infectious diseases                                                                                                                                                                                                          |
| Socioeconomic inequalities | Level of education/income | Kawatsu, 2014 (1)                                                 | Rodrigo, 2010 (unclear)<br>Ghiasvand, 2020 (0)<br>Millett, 2012 (13)<br>Kabapy, 2020 (unclear) | Crichton, 2015 (3) |             | Vet, 2015 (0)<br>Larson, 2014 (at least one)<br>Okoli, 2020 (1)<br>Arat, 2019 (2)<br>Fernández, 2015 (8)<br>Forshaw, 2017 (0)<br>Fisher, 2013 (1)<br>Tabacchi, 2016 (19)<br>Nagata, 2013 (unclear, at least 1)<br>Lucyk, 2019 (1)<br>De Vito, 2017 (4)<br>Bocquier, 2017 (5)<br>Jain, 2017 (5)<br>Tauli, 2016 (0)<br>Malerba, 2015 (0)<br>Okoli, 2021 (2)<br>Roller-Wirnsberger, 2021 (at least 1)<br>Faria, 2021 (0) | Di Gennaro, 2017 (1)<br>Alividza, 2018 (unclear, at least 2)<br>Najafizada, 2020 (4) | Ding, 2020 (0)<br>Coffey, 2018 (unclear)<br>Adams, 2018 (unclear, at least 1)<br>Newman, 2015 (3)<br>Possenti, 2016 (0)<br>Richterman, 2018 (0)<br>Spyromitrou-Xioufi, 2020 (0)<br>Dong, 2020 (unclear)<br>Suhrcke, 2011 (unclear) |

| Dimension of inequalities | Variables                                    | Infectious diseases: Author, year (number of UK studies included) |                                                    |                                                    |                              |                                                                                                                                                                                                                                                 |                           |                                                                                                                                 |
|---------------------------|----------------------------------------------|-------------------------------------------------------------------|----------------------------------------------------|----------------------------------------------------|------------------------------|-------------------------------------------------------------------------------------------------------------------------------------------------------------------------------------------------------------------------------------------------|---------------------------|---------------------------------------------------------------------------------------------------------------------------------|
|                           |                                              | Tuberculosis                                                      | HIV                                                | STI                                                | Hepatitis C                  | immunisation                                                                                                                                                                                                                                    | AMR/multi-drug resistance | Other infectious diseases                                                                                                       |
|                           | Employment /occupation                       | Kawatsu, 2014 (1)                                                 | Kentikelenis, 2015 (unclear)<br>Millett, 2012 (13) | Crichton, 2015 (3)<br>Kentikelenis, 2015 (unclear) | Kentikelenis, 2015 (unclear) | Arat, 2019 (2)<br>Tabacchi, 2016 (19)<br>Nagata, 2013 (unclear, at least 1)<br>Lucyk, 2019 (1)<br>De Vito, 2017 (4)<br>Bocquier, 2017 (5)<br>Tauli, 2016 (0)<br>Malerba, 2015 (0)<br>Okoli, 2021 (2)<br>Faria, 2021 (0)                         |                           | Kentikelenis, 2015 (unclear)<br>Li, 2020 (7)<br>Coffey, 2018 (unclear)<br>Adams, 2018 (unclear, at least 1)<br>Newman, 2015 (3) |
|                           | Social class/Area level socioeconomic status |                                                                   | Salgado-Barreira, 2014 (1) <sup>v</sup>            |                                                    |                              | Arat, 2019 (2)<br>Okoli, 2020 (1)<br>Fernández, 2015 (8)<br>Nagata, 2013 (unclear, at least 1)<br>Lucyk, 2019 (1)<br>Jain, 2017 (5)<br>Falagas, 2008 (1)<br>Tauli, 2016 (0)<br>Malerba, 2015 (0)<br>Okoli, 2021 (2)<br>Roller-Wirnsberger, 2021 |                           | Salgado-Barreira, 2014 (1)                                                                                                      |

| Dimension of inequalities | Variables                                                                                                        | Infectious diseases: Author, year (number of UK studies included) |     |                    |             |                                                                                                                                                              |                                                              |                                                                                                                                                                                                                                  |
|---------------------------|------------------------------------------------------------------------------------------------------------------|-------------------------------------------------------------------|-----|--------------------|-------------|--------------------------------------------------------------------------------------------------------------------------------------------------------------|--------------------------------------------------------------|----------------------------------------------------------------------------------------------------------------------------------------------------------------------------------------------------------------------------------|
|                           |                                                                                                                  | Tuberculosis                                                      | HIV | STI                | Hepatitis C | immunisation                                                                                                                                                 | AMR/multi-drug resistance                                    | Other infectious diseases                                                                                                                                                                                                        |
|                           | Deprivation                                                                                                      | Offer, 2015 (18) <sup>a</sup>                                     |     | Crichton, 2015 (3) |             | Vukovic, 2019 (6)<br>Fisher, 2013 (1)<br>Nagata, 2013 (unclear, at least 1)<br>Lucyk, 2019 (1)                                                               |                                                              | Adams, 2018 (unclear, at least 1)<br>Newman, 2015 (3)                                                                                                                                                                            |
|                           | Residence/living situation (e.g urban vs rural, living in a home environment with moisture damage, house tenure) | Nava-Aguilera, 2009 (1)<br>Cormier 2019 (0)                       |     |                    |             | Okoli, 2020 (1)<br>Fernández, 2015 (8)<br>Tabacchi, 2016 (19)<br>Nagata, 2013 (unclear, at least 1)<br>Tauli, 2016 (0)<br>Okoli, 2021 (2)<br>Faria, 2021 (0) | Alividza, 2018 (unclear, at least 2)<br>Najafizada, 2020 (4) | Ly, 2021 (4)<br>Dong, 2020 (unclear)<br>Spyromitrou-Xioufi, 2020 (0)<br>Newman, 2015 (3)<br>Possenti, 2016 (0)<br>Richterman, 2018 (0)<br>Coffey, 2018 (unclear)<br>Rostami, 2021 (2)<br>Fauroux, 2017 (8)<br>Rostami, 2019a (2) |

**Online supplemental file 4: ASSESSMENT OF INDIVIDUAL REVIEWS USING ASSESSMENT OF MULTIPLE SYSTEMATIC REVIEWS VERSION 2 (AMSTAR2) CHECKLIST**

| Study ID (Author, Year) | 1 | 2   | 3 | 4   | 5 | 6 | 7 | 8   | 9   | 10 | 11    | 12    | 13 | 14 | 15    | 16 |
|-------------------------|---|-----|---|-----|---|---|---|-----|-----|----|-------|-------|----|----|-------|----|
| Tavares, 2017           | Y | N   | Y | P Y | N | N | N | Y   | N   | N  | N M C | N M C | Y  | N  | N M C | Y  |
| Tollefson, 2013         | Y | N   | N | P Y | Y | Y | N | Y   | N   | N  | N M C | N M C | N  | N  | N M C | Y  |
| Vet, 2015               | Y | N   | N | P Y | N | N | N | P Y | Y   | N  | N M C | N M C | Y  | N  | N M C | Y  |
| Beijer 2012             | Y | N   | N | P Y | N | Y | N | Y   | N   | N  | Y     | Y     | N  | Y  | N     | Y  |
| Behera, 2018            | Y | N   | N | P Y | N | N | N | N   | N   | N  | N M C | N M C | N  | N  | N M C | Y  |
| Vukovic, 2019           | Y | N   | N | P Y | Y | Y | N | Y   | Y   | N  | N M C | N M C | N  | N  | N M C | Y  |
| Platt, 2013a            | Y | N   | N | P Y | N | N | N | Y   | P Y | N  | N M C | N M C | Y  | Y  | N M C | Y  |
| Platt, 2013b            | Y | N   | N | Y   | N | N | N | N   | P Y | N  | N M C | N M C | Y  | Y  | N M C | Y  |
| Prost, 2007             | Y | N   | N | Y   | N | N | N | P Y | N   | N  | N M C | N M C | N  | N  | N M C | N  |
| Pulver, 2016            | Y | N   | N | P Y | Y | Y | N | Y   | N   | N  | N M C | N M C | Y  | Y  | N M C | N  |
| Rossi, 2012             | Y | P Y | N | Y   | Y | Y | N | P Y | N   | N  | Y     | N     | N  | Y  | N     | Y  |
| Rostami, 2019           | Y | Y   | N | P Y | N | Y | N | P Y | N   | N  | Y     | N     | Y  | Y  | Y     | Y  |
| Di Gennaro, 2017        | Y | N   | N | P Y | N | Y | N | Y   | Y   | N  | Y     | Y     | Y  | Y  | Y     | N  |
| Fauroux, 2017           | Y | P Y | N | Y   | N | N | N | Y   | Y   | N  | N M C | N M C | Y  | Y  | N M C | Y  |

| Study ID<br>(Author, Year) | 1 | 2   | 3 | 4   | 5 | 6 | 7 | 8   | 9   | 10 | 11    | 12    | 13 | 14 | 15    | 16 |
|----------------------------|---|-----|---|-----|---|---|---|-----|-----|----|-------|-------|----|----|-------|----|
| Hahne, 2013                | Y | P Y | N | P Y | N | Y | N | N   | P Y | N  | N M C | N M C | N  | Y  | N M C | Y  |
| Jin, 20                    | Y | Y   | N | P Y | Y | N | N | N   | P Y | N  | Y     | Y     | Y  | Y  | N     | Y  |
| Larson, 2014               | N | N   | N | P Y | N | N | N | N   | N   | N  | N M C | N M C | N  | N  | N M C | Y  |
| Nava-Aguilera,<br>2009     | N | N   | N | P Y | N | Y | N | Y   | Y   | N  | Y     | Y     | Y  | Y  | Y     | N  |
| Okoli, 2020                | Y | Y   | N | P Y | Y | Y | N | Y   | Y   | N  | Y     | Y     | Y  | Y  | Y     | Y  |
| Schierhout,<br>2020        | N | N   | N | P Y | Y | N | N | P Y | Y   | N  | Y     | Y     | Y  | Y  | Y     | Y  |
| Wayal, 2018                | Y | N   | N | Y   | N | Y | N | Y   | Y   | N  | N M C | N M C | Y  | Y  | N M C | Y  |
| Yu, 2020                   | Y | N   | N | P Y | N | N | N | Y   | N   | N  | N M C | N M C | N  | N  | N M C | Y  |
| Gorjana, 2017              | Y | N   | N | P Y | N | N | N | Y   | Y   | N  | N M C | N M C | Y  | Y  | N M C | Y  |
| Rodrigo, 2010              | Y | N   | N | P Y | N | Y | N | N   | N   | N  | N M C | N M C | N  | N  | N M C | Y  |
| Rostami, 2019b             | Y | Y   | N | Y   | Y | Y | N | Y   | N   | N  | Y     | Y     | N  | Y  | N     | Y  |
| Coffey, 2018               | Y | N   | N | P Y | N | N | N | N   | Y   | N  | N M C | N M C | N  | Y  | N M C | N  |
| Ghiasvand,<br>2020         | Y | N   | N | P Y | Y | N | N | P Y | Y   | N  | Y     | Y     | Y  | Y  | Y     | Y  |
| Cormier 2019               | Y | N   | N | P Y | Y | N | N | N   | N   | N  | N M C | N M C | N  | N  | N M C | Y  |
| Abraha, 2018               | Y | N   | N | N   | N | N | N | N   | N   | N  | N M C | N M C | N  | Y  | N M C | N  |



| Study ID<br>(Author, Year) | 1 | 2   | 3 | 4   | 5 | 6 | 7 | 8   | 9   | 10 | 11    | 12    | 13 | 14 | 15    | 16 |
|----------------------------|---|-----|---|-----|---|---|---|-----|-----|----|-------|-------|----|----|-------|----|
| Adams, 2018                | Y | Y   | N | Y   | Y | N | N | P Y | Y   | N  | Y     | Y     | Y  | Y  | Y     | N  |
| Aldridge, 2018             | N | N   | N | N   | N | Y | N | N   | N   | N  | Y     | N     | N  | Y  | N     | Y  |
| Alividza, 2018             | Y | N   | N | P Y | Y | N | N | Y   | Y   | N  | N M C | N M C | Y  | N  | N M C | Y  |
| Arat, 2019                 | Y | N   | N | P Y | Y | N | N | Y   | N   | N  | N M C | N M C | Y  | Y  | N M C | Y  |
| Chan, 2017                 | Y | N   | N | N   | Y | Y | N | N   | Y   | N  | Y     | Y     | Y  | Y  | N     | Y  |
| Chernet,2017               | N | N   | N | P Y | Y | N | N | N   | N   | N  | N     | N     | N  | Y  | N     | Y  |
| Colledge, 2020             | Y | N   | N | N   | N | N | N | N   | N   | N  | N M C | N M C | N  | N  | N M C | Y  |
| Crichton,2015              | Y | P Y | Y | P Y | N | N | N | N   | P Y | N  | Y     | Y     | Y  | Y  | N     | Y  |
| Eilami, 2019               | Y | N   | N | P Y | N | N | N | N   | N   | N  | Y     | N     | N  | Y  | Y     | Y  |
| Fakoya, 2015               | Y | P Y | N | P Y | Y | N | N | P Y | N   | N  | N M C | N M C | Y  | N  | N M C | Y  |
| Faustini, 2005             | Y | N   | N | P Y | N | N | N | N   | N   | N  | Y     | N     | N  | Y  | N     | Y  |
| Fernández,<br>2015         | Y | N   | N | P Y | N | N | N | Y   | N   | N  | N M C | Y     | Y  | N  | N M C | Y  |
| Forshaw, 2017              | Y | N   | N | P Y | Y | N | N | Y   | P Y | N  | Y     | N     | Y  | Y  | Y     | Y  |
| Fisher, 2013               | Y | N   | N | P Y | N | N | N | Y   | N   | N  | Y     | Y     | Y  | Y  | N     | Y  |
| Greenaway,<br>2015         | Y | N   | N | P Y | N | N | N | N   | Y   | N  | Y     | N     | N  | Y  | N     | Y  |

| Study ID<br>(Author, Year) | 1 | 2   | 3 | 4   | 5 | 6 | 7 | 8   | 9   | 10 | 11    | 12    | 13 | 14 | 15    | 16 |
|----------------------------|---|-----|---|-----|---|---|---|-----|-----|----|-------|-------|----|----|-------|----|
| Sandgren, 2014.            | Y | N   | N | P Y | Y | Y | N | Y   | N   | N  | Y     | N     | N  | Y  | N     | N  |
| Schepisi, 2018.            | Y | Y   | N | P Y | Y | N | N | N   | Y   | N  | Y     | N     | N  | Y  | N     | Y  |
| Suhrcke, 2011.             | Y | N   | N | Y   | Y | Y | N | Y   | N   | N  | N M C | N M C | N  | Y  | N M C | Y  |
| Stockdale, 2020.           | Y | Y   | N | Y   | Y | Y | N | N   | P Y | N  | Y     | Y     | Y  | Y  | N     | Y  |
| Tabacchi                   | Y | N   | N | Y   | N | N | N | Y   | N   | N  | Y     | N     | N  | Y  | Y     | Y  |
| Strifler                   | Y | N   | N | P Y | Y | Y | N | Y   | Y   | N  | N M C | N M C | N  | Y  | N M C | N  |
| Nagata, 2011               | Y | P Y | N | P Y | N | Y | N | N   | P Y | N  | N M C | N M C | N  | Y  | N M C | Y  |
| Nellums, 2018              | Y | Y   | N | P Y | Y | Y | N | Y   | P Y | N  | Y     | Y     | Y  | Y  | N     | Y  |
| Newman, 2015               | Y | Y   | N | P Y | Y | Y | N | P Y | Y   | N  | Y     | Y     | Y  | Y  | Y     | Y  |
| Oldenburg, 2014            | Y | P Y | N | Y   | N | Y | N | N   | Y   | N  | Y     | N     | Y  | Y  | Y     | Y  |
| Oldenburg_2015             | Y | N   | N | P Y | N | Y | N | N   | N   | N  | Y     | N     | N  | Y  | N     | Y  |
| Operario 2008              | Y | N   | N | Y   | Y | Y | N | N   | P Y | N  | Y     | N     | N  | Y  | Y     | N  |
| Offer_2015                 | Y | N   | N | P Y | Y | Y | N | Y   | N   | N  | N M C | N M C | N  | N  | N M C | N  |
| Mipatrini, 2017            | N | N   | Y | N   | Y | N | N | N   | N   | N  | N M C | N M C | N  | N  | N M C | Y  |
| Lucyk, 2019.               | N | N   | N | N   | Y | N | N | P Y | P Y | N  | N M C | N M C | Y  | N  | N M C | Y  |

1  
2  
3  
4  
5  
6  
7  
8  
9  
10  
11  
12  
13  
14  
15  
16  
17  
18  
19  
20  
21  
22  
23  
24  
25  
26  
27  
28  
29  
30  
31  
32  
33  
34  
35  
36  
37  
38  
39  
40  
41  
42  
43  
44  
45  
46

| Study ID (Author, Year)  | 1 | 2 | 3 | 4   | 5 | 6 | 7 | 8   | 9   | 10 | 11    | 12    | 13 | 14 | 15    | 16 |
|--------------------------|---|---|---|-----|---|---|---|-----|-----|----|-------|-------|----|----|-------|----|
| De Vito, 2017            | Y | N | Y | P Y | N | N | N | N   | N   | N  | N M C | N M C | N  | N  | N M C | N  |
| Bocquier, 2017           | Y | N | N | P Y | Y | N | N | N   | N   | N  | N M C | N M C | Y  | Y  | N M C | Y  |
| Morais, 2017             | Y | Y | N | N   | Y | Y | N | N   | N   | N  | N M C | N M C | N  | N  | N M C | Y  |
| Spyromitrou-Xioufi, 2020 | Y | N | N | N   | Y | Y | N | Y   | P Y | N  | Y     | Y     | Y  | Y  | Y     | Y  |
| Van Gerwen, 2020         | Y | N | N | N   | Y | N | N | Y   | N   | N  | Y     | N     | N  | Y  | N     | N  |
| Zamani, 2018.            | N | N | N | N   | Y | N | N | N   | N   | N  | Y     | N     | N  | Y  | N     | Y  |
| Jain, 2017               | Y | N | N | Y   | N | N | N | Y   | Y   | N  | Y     | Y     | Y  | Y  | Y     | Y  |
| Kentikelenis, 2015       | Y | N | N | Y   | N | N | N | N   | N   | N  | N M C | N M C | N  | N  | N M C | Y  |
| Li, P. 2020              | Y | N | N | P Y | Y | Y | N | Y   | Y   | N  | Y     | Y     | Y  | Y  | Y     | Y  |
| Leung,2019               | Y | Y | N | Y   | N | N | N | P Y | N   | N  | Y     | N     | N  | Y  | N     | Y  |
| Lindsay,2015             | Y | N | N | P Y | N | N | N | Y   | N   | N  | N M C | N M C | N  | N  | N M C | Y  |
| Salgado-Barreira         | Y | N | N | P Y | Y | N | N | Y   | N   | N  | N M C | N M C | Y  | Y  | N M C | N  |
| Fournet, 2018.           | N | N | N | N   | Y | N | N | N   | N   | N  | N M C | N M C | N  | N  | N M C | Y  |
| Bonten et al., 2020      | Y | N | N | P Y | N | N | N | N   | N   | N  | Y     | N     | N  | Y  | N     | Y  |

| Study ID<br>(Author, Year)        | 1 | 2 | 3 | 4   | 5 | 6 | 7 | 8   | 9   | 10 | 11    | 12    | 13 | 14 | 15    | 16 |
|-----------------------------------|---|---|---|-----|---|---|---|-----|-----|----|-------|-------|----|----|-------|----|
| Chen et al.,<br>2019              | N | N | N | P Y | N | Y | N | N   | Y   | N  | Y     | Y     | Y  | Y  | Y     | Y  |
| Denning et al.,<br>2018           | N | N | N | Y   | Y | N | N | P Y | P Y | N  | Y     | Y     | N  | N  | N     | Y  |
| Falagas &<br>Zarkadoulia,<br>2008 | Y | N | N | P Y | N | N | N | Y   | N   | N  | N M C | N M C | N  | Y  | N M C | N  |
| Falla et al.,<br>2018             | N | N | N | P Y | N | N | N | N   | P Y | N  | N M C | N M C | N  | Y  | N M C | Y  |
| Hermann et al.,<br>2019           | Y | Y | N | Y   | Y | N | N | N   | Y   | N  | N M C | N M C | Y  | Y  | N M C | N  |
| Millett et al.,<br>2012           | Y | N | N | Y   | N | N | N | N   | N   | N  | Y     | N     | Y  | N  | N     | Y  |
| Kawatsu, 2014                     | Y | N | N | N   | N | N | N | P Y | N   | N  | N M C | N M C | N  | Y  | N M C | Y  |
| Possenti, 2016                    | N | N | N | P Y | N | Y | N | N   | P Y | N  | Y     | Y     | Y  | Y  | Y     | Y  |
| Richterman,<br>2018               | Y | N | N | P Y | Y | Y | N | N   | Y   | N  | Y     | Y     | Y  | Y  | Y     | Y  |
| Tauli, 2016                       | Y | N | N | P Y | N | N | N | Y   | N   | N  | N M C | N M C | N  | N  | N M C | Y  |
| Malerba, 2015                     | Y | N | N | Y   | Y | Y | N | P Y | N   | N  | N M C | N M C | N  | N  | N M C | Y  |
| Leumi, 2020                       | Y | Y | N | Y   | Y | Y | N | Y   | Y   | N  | Y     | Y     | Y  | Y  | Y     | Y  |

| Study ID<br>(Author, Year) | 1 | 2   | 3 | 4   | 5 | 6 | 7   | 8   | 9   | 10 | 11    | 12    | 13 | 14 | 15    | 16 |
|----------------------------|---|-----|---|-----|---|---|-----|-----|-----|----|-------|-------|----|----|-------|----|
| Arum, 2021                 | Y | Y   | N | P Y | Y | Y | N   | Y   | Y   | N  | Y     | Y     | Y  | Y  | Y     | Y  |
| Mirzadedh,<br>2021         | Y | N   | N | Y   | Y | N | N   | P Y | Y   | N  | Y     | Y     | Y  | Y  | Y     | Y  |
| Macina, 2021               | Y | N   | N | Y   | N | N | N   | Y   | N   | N  | N M C | N M C | N  | N  | N M C | Y  |
| Ly, 2021                   | Y | Y   | N | Y   | Y | N | N   | Y   | N   | N  | N M C | N M C | N  | N  | N M C | Y  |
| Lafond, 2021               | Y | P Y | N | Y   | Y | N | N   | N   | P Y | N  | Y     | Y     | Y  | Y  | N     | Y  |
| McBride                    | Y | N   | N | P Y | N | N | N   | Y   | N   | N  | N M C | N M C | N  | N  | N M C | Y  |
| Ding 2020                  | Y | N   | N | Y   | Y | N | N   | Y   | Y   | N  | Y     | Y     | Y  | Y  | Y     | Y  |
| Sultana 2021               | Y | Y   | N | N   | Y | Y | P Y | Y   | Y   | N  | Y     | Y     | Y  | Y  | Y     | Y  |
| Whelan 2021                | Y | N   | N | N   | Y | N | N   | Y   | N   | N  | N M C | N M C | N  | Y  | N M C | Y  |
| Faria 2021                 | Y | Y   | N | P Y | Y | Y | N   | Y   | Y   | N  | Y     | Y     | Y  | Y  | N     | Y  |
| Jackson 2021               | Y | Y   | N | P Y | Y | Y | N   | Y   | Y   | N  | Y     | Y     | Y  | Y  | N     | Y  |
| Badri 2021                 | Y | N   | N | N   | Y | N | N   | P Y | Y   | N  | Y     | Y     | Y  | Y  | Y     | Y  |
| Dugan 2021                 | Y | N   | N | P Y | N | N | N   | N   | P Y | N  | N M C | N M C | Y  | N  | N M C | Y  |
| Kabapy 2020                | Y | Y   | N | P Y | Y | Y | N   | N   | Y   | N  | Y     | Y     | Y  | Y  | Y     | Y  |
| Dong 2020                  | Y | N   | Y | N   | Y | Y | N   | N   | Y   | N  | Y     | N     | Y  | N  | N     | Y  |
| Najafizada,<br>2020        | N | N   | N | N   | N | N | N   | N   | N   | N  | N M C | N M C | N  | N  | N M C | Y  |

| Study ID<br>(Author, Year)    | 1 | 2   | 3 | 4   | 5 | 6 | 7 | 8   | 9 | 10 | 11    | 12    | 13 | 14 | 15    | 16 |
|-------------------------------|---|-----|---|-----|---|---|---|-----|---|----|-------|-------|----|----|-------|----|
| Nurollahpour<br>Shiadeh, 2020 | Y | N   | N | P Y | Y | Y | N | P Y | Y | N  | Y     | Y     | Y  | Y  | N     | Y  |
| Pega 2021                     | Y | P Y | N | P Y | Y | Y | N | Y   | Y | N  | Y     | Y     | Y  | Y  | N     | N  |
| Rostami 2021                  | Y | N   | N | P Y | Y | Y | N | P Y | Y | N  | Y     | Y     | Y  | Y  | Y     | Y  |
| Song, 2021                    | Y | N   | N | P Y | Y | Y | N | Y   | Y | N  | Y     | Y     | Y  | Y  | N     | Y  |
| Wu 2021                       | Y | Y   | Y | Y   | Y | Y | N | Y   | Y | N  | Y     | Y     | Y  | Y  | Y     | Y  |
| Okoli 2020                    | Y | N   | N | N   | Y | Y | N | P Y | Y | N  | Y     | Y     | Y  | Y  | Y     | Y  |
| Roller-Wirnsber<br>ger 2021   | Y | N   | Y | P Y | N | N | N | P Y | N | N  | N M C | N M C | N  | Y  | N M C | N  |

Key: Y=Yes; N=No, P Y = Partial yes and N M C = No meta-analysis conducted

AMSTAR 2 Items:

1. Did the research questions and inclusion criteria for the review include the components of PICO?
2. Did the report of the review contain an explicit statement that the review methods were established prior to the conduct of the review and did the report justify any significant deviations from the protocol?
3. Did the review authors explain their selection of the study designs for inclusion in the review?
4. Did the review authors use a comprehensive literature search strategy?
5. Did the review authors perform study selection in duplicate?
6. Did the review authors perform data extraction in duplicate?

1  
2  
3 7. Did the review authors provide a list of excluded studies and justify the exclusions?  
4

5 8. Did the review authors describe the included studies in adequate detail?  
6

7 9. Did the review authors use a satisfactory technique for assessing the risk of bias (RoB) in individual studies that were included in the review?"  
8

9 10. Did the review authors report on the sources of funding for the studies included in the review?  
10

11 11. If meta-analysis was performed did the review authors use appropriate methods for statistical combination of results?"  
12

13 12. If meta-analysis was performed, did the review authors assess the potential impact of RoB in individual studies on the results of the meta-analysis or  
14 other evidence synthesis?  
15

16 13. Did the review authors account for RoB in individual studies when interpreting/ discussing the results of the review?"  
17

18 14. Did the review authors provide a satisfactory explanation for, and discussion of, any heterogeneity observed in the results of the review?"  
19

20 15. If they performed quantitative synthesis did the review authors carry out an adequate investigation of publication bias (small study bias) and discuss its  
21 likely impact on the results of the review?"  
22

23 16. Did the review authors report any potential sources of conflict of interest, including any funding they received for conducting the review?"  
24  
25  
26  
27  
28  
29  
30  
31  
32  
33  
34  
35  
36  
37  
38  
39  
40  
41  
42  
43  
44  
45  
46

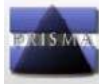

## PRISMA 2020 Checklist

| Section and Topic             | Item # | Checklist item                                                                                                                                                                                                                                                                                       | Location where item is reported      |
|-------------------------------|--------|------------------------------------------------------------------------------------------------------------------------------------------------------------------------------------------------------------------------------------------------------------------------------------------------------|--------------------------------------|
| <b>TITLE</b>                  |        |                                                                                                                                                                                                                                                                                                      |                                      |
| Title                         | 1      | Identify the report as a systematic review.                                                                                                                                                                                                                                                          | Page 1, Page 4                       |
| <b>ABSTRACT</b>               |        |                                                                                                                                                                                                                                                                                                      |                                      |
| Abstract                      | 2      | See the PRISMA 2020 for Abstracts checklist.                                                                                                                                                                                                                                                         | Page 2                               |
| <b>INTRODUCTION</b>           |        |                                                                                                                                                                                                                                                                                                      |                                      |
| Rationale                     | 3      | Describe the rationale for the review in the context of existing knowledge.                                                                                                                                                                                                                          | Page 4                               |
| Objectives                    | 4      | Provide an explicit statement of the objective(s) or question(s) the review addresses.                                                                                                                                                                                                               | Page 4                               |
| <b>METHODS</b>                |        |                                                                                                                                                                                                                                                                                                      |                                      |
| Eligibility criteria          | 5      | Specify the inclusion and exclusion criteria for the review and how studies were grouped for the syntheses.                                                                                                                                                                                          | Page 6, Table 1                      |
| Information sources           | 6      | Specify all databases, registers, websites, organisations, reference lists and other sources searched or consulted to identify studies. Specify the date when each source was last searched or consulted.                                                                                            | Page 5                               |
| Search strategy               | 7      | Present the full search strategies for all databases, registers and websites, including any filters and limits used.                                                                                                                                                                                 | Page 5<br>online supplemental file 1 |
| Selection process             | 8      | Specify the methods used to decide whether a study met the inclusion criteria of the review, including how many reviewers screened each record and each report retrieved, whether they worked independently, and if applicable, details of automation tools used in the process.                     | Page 5                               |
| Data collection process       | 9      | Specify the methods used to collect data from reports, including how many reviewers collected data from each report, whether they worked independently, any processes for obtaining or confirming data from study investigators, and if applicable, details of automation tools used in the process. | Page 6-7                             |
| Data items                    | 10a    | List and define all outcomes for which data were sought. Specify whether all results that were compatible with each outcome domain in each study were sought (e.g. for all measures, time points, analyses), and if not, the methods used to decide which results to collect.                        | Page 6-7                             |
|                               | 10b    | List and define all other variables for which data were sought (e.g. participant and intervention characteristics, funding sources). Describe any assumptions made about any missing or unclear information.                                                                                         | Page 6-7                             |
| Study risk of bias assessment | 11     | Specify the methods used to assess risk of bias in the included studies, including details of the tool(s) used, how many reviewers assessed each study and whether they worked independently, and if applicable, details of automation tools used in the process.                                    | Page 7                               |
| Effect measures               | 12     | Specify for each outcome the effect measure(s) (e.g. risk ratio, mean difference) used in the synthesis or presentation of results.                                                                                                                                                                  | Page 8 - 13                          |
| Synthesis methods             | 13a    | Describe the processes used to decide which studies were eligible for each synthesis (e.g. tabulating the study intervention characteristics and comparing against the planned groups for each synthesis (item #5)).                                                                                 | Page 7                               |
|                               | 13b    | Describe any methods required to prepare the data for presentation or synthesis, such as handling of missing summary statistics, or data conversions.                                                                                                                                                | Page 7                               |
|                               | 13c    | Describe any methods used to tabulate or visually display results of individual studies and syntheses.                                                                                                                                                                                               | Page 7                               |
|                               | 13d    | Describe any methods used to synthesize results and provide a rationale for the choice(s). If meta-analysis was performed, describe the model(s), method(s) to identify the presence and extent of statistical heterogeneity, and software package(s) used.                                          | Page 7                               |
|                               | 13e    | Describe any methods used to explore possible causes of heterogeneity among study results (e.g. subgroup analysis, meta-regression).                                                                                                                                                                 | N/A                                  |



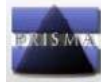

## PRISMA 2020 Checklist

| Section and Topic             | Item # | Checklist item                                                                                                                                                                                                                                                                       | Location where item is reported              |
|-------------------------------|--------|--------------------------------------------------------------------------------------------------------------------------------------------------------------------------------------------------------------------------------------------------------------------------------------|----------------------------------------------|
|                               | 13f    | Describe any sensitivity analyses conducted to assess robustness of the synthesized results.                                                                                                                                                                                         | N/A                                          |
| Reporting bias assessment     | 14     | Describe any methods used to assess risk of bias due to missing results in a synthesis (arising from reporting biases).                                                                                                                                                              | N/A                                          |
| Certainty assessment          | 15     | Describe any methods used to assess certainty (or confidence) in the body of evidence for an outcome.                                                                                                                                                                                | N/A                                          |
| <b>RESULTS</b>                |        |                                                                                                                                                                                                                                                                                      |                                              |
| Study selection               | 16a    | Describe the results of the search and selection process, from the number of records identified in the search to the number of studies included in the review, ideally using a flow diagram.                                                                                         | Page 7, Figure 1                             |
|                               | 16b    | Cite studies that might appear to meet the inclusion criteria, but which were excluded, and explain why they were excluded.                                                                                                                                                          | Page 7                                       |
| Study characteristics         | 17     | Cite each included study and present its characteristics.                                                                                                                                                                                                                            | online supplemental file 2 and 3, Page 7-13  |
| Risk of bias in studies       | 18     | Present assessments of risk of bias for each included study.                                                                                                                                                                                                                         | Page 8, Figure 3, online supplemental file 4 |
| Results of individual studies | 19     | For all outcomes, present, for each study: (a) summary statistics for each group (where appropriate) and (b) an effect estimate and its precision (e.g. confidence/credible interval), ideally using structured tables or plots.                                                     | Page 7-13, online supplemental file 2 and 3  |
| Results of syntheses          | 20a    | For each synthesis, briefly summarise the characteristics and risk of bias among contributing studies.                                                                                                                                                                               | Page 7-13                                    |
|                               | 20b    | Present results of all statistical syntheses conducted. If meta-analysis was done, present for each the summary estimate and its precision (e.g. confidence/credible interval) and measures of statistical heterogeneity. If comparing groups, describe the direction of the effect. | N/A                                          |
|                               | 20c    | Present results of all investigations of possible causes of heterogeneity among study results.                                                                                                                                                                                       | N/A                                          |
|                               | 20d    | Present results of all sensitivity analyses conducted to assess the robustness of the synthesized results.                                                                                                                                                                           | N/A                                          |
| Reporting biases              | 21     | Present assessments of risk of bias due to missing results (arising from reporting biases) for each synthesis assessed.                                                                                                                                                              | N/A                                          |
| Certainty of evidence         | 22     | Present assessments of certainty (or confidence) in the body of evidence for each outcome assessed.                                                                                                                                                                                  | N/A                                          |
| <b>DISCUSSION</b>             |        |                                                                                                                                                                                                                                                                                      |                                              |
| Discussion                    | 23a    | Provide a general interpretation of the results in the context of other evidence.                                                                                                                                                                                                    | Page 13-15                                   |
|                               | 23b    | Discuss any limitations of the evidence included in the review.                                                                                                                                                                                                                      | Page 14-15                                   |
|                               | 23c    | Discuss any limitations of the review processes used.                                                                                                                                                                                                                                | Page 14-15                                   |
|                               | 23d    | Discuss implications of the results for practice, policy, and future research.                                                                                                                                                                                                       | Page 13-15                                   |
| <b>OTHER INFORMATION</b>      |        |                                                                                                                                                                                                                                                                                      |                                              |
| Registration and              | 24a    | Provide registration information for the review, including register name and registration number, or state that the review was not registered.                                                                                                                                       | Page 5                                       |

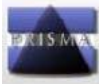

## PRISMA 2020 Checklist

| Section and Topic                              | Item # | Checklist item                                                                                                                                                                                                                             | Location where item is reported |
|------------------------------------------------|--------|--------------------------------------------------------------------------------------------------------------------------------------------------------------------------------------------------------------------------------------------|---------------------------------|
| protocol                                       | 24b    | Indicate where the review protocol can be accessed, or state that a protocol was not prepared.                                                                                                                                             | Page 5                          |
|                                                | 24c    | Describe and explain any amendments to information provided at registration or in the protocol.                                                                                                                                            | -                               |
| Support                                        | 25     | Describe sources of financial or non-financial support for the review, and the role of the funders or sponsors in the review.                                                                                                              | Page 16                         |
| Competing interests                            | 26     | Declare any competing interests of review authors.                                                                                                                                                                                         | Page 16                         |
| Availability of data, code and other materials | 27     | Report which of the following are publicly available and where they can be found: template data collection forms; data extracted from included studies; data used for all analyses; analytic code; any other materials used in the review. | Online supplemental files       |

From: Page MJ, McKenzie JE, Bossuyt PM, Boutron I, Hoffmann TC, Mulrow CD, et al. The PRISMA 2020 statement: an updated guideline for reporting systematic reviews. *BMJ* 2021;372:n71. doi: 10.1136/bmj.n71

For more information, visit: <http://www.prisma-statement.org/>

# BMJ Open

## Health Inequalities in Infectious Diseases: A Systematic Overview of Reviews

|                                 |                                                                                                                                                                                                                                                                                                                                                                                                                                                                                                                                                                                                                                                                                                                                                                                                                                                                    |
|---------------------------------|--------------------------------------------------------------------------------------------------------------------------------------------------------------------------------------------------------------------------------------------------------------------------------------------------------------------------------------------------------------------------------------------------------------------------------------------------------------------------------------------------------------------------------------------------------------------------------------------------------------------------------------------------------------------------------------------------------------------------------------------------------------------------------------------------------------------------------------------------------------------|
| Journal:                        | <i>BMJ Open</i>                                                                                                                                                                                                                                                                                                                                                                                                                                                                                                                                                                                                                                                                                                                                                                                                                                                    |
| Manuscript ID                   | bmjopen-2022-067429.R2                                                                                                                                                                                                                                                                                                                                                                                                                                                                                                                                                                                                                                                                                                                                                                                                                                             |
| Article Type:                   | Original research                                                                                                                                                                                                                                                                                                                                                                                                                                                                                                                                                                                                                                                                                                                                                                                                                                                  |
| Date Submitted by the Author:   | 23-Feb-2023                                                                                                                                                                                                                                                                                                                                                                                                                                                                                                                                                                                                                                                                                                                                                                                                                                                        |
| Complete List of Authors:       | Ayorinde, Abimbola; University of Warwick, Warwick Medical School<br>Ghosh, Iman; University of Warwick, Warwick Medical School<br>Ali, Ifra; University of Warwick, Warwick Medical School<br>Zahair, Iram; University of Liverpool<br>Olaewaju, Olajumoke; Johns Hopkins University Bloomberg School of Public Health, Department of Health, Behavior and Society<br>Singh, Megha; University of Warwick, Warwick Medical School<br>Meehan, Edward; Monash University<br>Anjorin, Seun; University of Oxford Nuffield Department of Population Health<br>Rotheram, Suzanne; University of Liverpool, Institute of Population Health<br>Barr, Ben ; University of Liverpool, Public Health and Policy<br>McCarthy, Noel; Trinity College Dublin, School of Medicine<br>Oyebode, Oyinlola; Queen Mary University of London, Wolfson Institute of Population Health |
| <b>Primary Subject Heading</b>: | Infectious diseases                                                                                                                                                                                                                                                                                                                                                                                                                                                                                                                                                                                                                                                                                                                                                                                                                                                |
| Secondary Subject Heading:      | Epidemiology, Public health                                                                                                                                                                                                                                                                                                                                                                                                                                                                                                                                                                                                                                                                                                                                                                                                                                        |
| Keywords:                       | Public health < INFECTIOUS DISEASES, INFECTIOUS DISEASES, Epidemiology < INFECTIOUS DISEASES                                                                                                                                                                                                                                                                                                                                                                                                                                                                                                                                                                                                                                                                                                                                                                       |
|                                 |                                                                                                                                                                                                                                                                                                                                                                                                                                                                                                                                                                                                                                                                                                                                                                                                                                                                    |

SCHOLARONE™  
Manuscripts

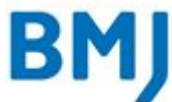

I, the Submitting Author has the right to grant and does grant on behalf of all authors of the Work (as defined in the below author licence), an exclusive licence and/or a non-exclusive licence for contributions from authors who are: i) UK Crown employees; ii) where BMJ has agreed a CC-BY licence shall apply, and/or iii) in accordance with the terms applicable for US Federal Government officers or employees acting as part of their official duties; on a worldwide, perpetual, irrevocable, royalty-free basis to BMJ Publishing Group Ltd ("BMJ") its licensees and where the relevant Journal is co-owned by BMJ to the co-owners of the Journal, to publish the Work in this journal and any other BMJ products and to exploit all rights, as set out in our [licence](#).

The Submitting Author accepts and understands that any supply made under these terms is made by BMJ to the Submitting Author unless you are acting as an employee on behalf of your employer or a postgraduate student of an affiliated institution which is paying any applicable article publishing charge ("APC") for Open Access articles. Where the Submitting Author wishes to make the Work available on an Open Access basis (and intends to pay the relevant APC), the terms of reuse of such Open Access shall be governed by a Creative Commons licence – details of these licences and which [Creative Commons](#) licence will apply to this Work are set out in our licence referred to above.

Other than as permitted in any relevant BMJ Author's Self Archiving Policies, I confirm this Work has not been accepted for publication elsewhere, is not being considered for publication elsewhere and does not duplicate material already published. I confirm all authors consent to publication of this Work and authorise the granting of this licence.

# Health Inequalities in Infectious Diseases: A Systematic Overview of Reviews

Abimbola A Ayorinde<sup>1\*</sup>, Iman Ghosh<sup>1</sup>, Ifra Ali<sup>1</sup>, Iram Zahair<sup>2</sup>, Olajumoke Olarewaju<sup>3</sup>, Megha Singh<sup>1</sup>, Edward Meehan<sup>4</sup>, Seun S Anjorin<sup>5</sup>, Suzanne Rotheram<sup>2</sup>, Benjamin Barr<sup>2</sup>, Noel McCarthy<sup>6</sup>, Oyinlola Oyeboode<sup>7</sup>

<sup>1</sup>Warwick Medical School, University of Warwick, Coventry, United Kingdom

<sup>2</sup>Institute of Population Health, University of Liverpool, Liverpool, United Kingdom

<sup>3</sup>Bloomberg School of Public Health, John Hopkins University, Maryland, United States of America

<sup>4</sup>Monash University, Melbourne, Victoria, Australia

<sup>5</sup>Nuffield Department of Population Health, University of Oxford, Oxford, United Kingdom

<sup>6</sup>School of Medicine, Trinity College Dublin, Ireland

<sup>7</sup>Wolfson Institute of Population Health, Queen Mary University of London, United Kingdom

\*Corresponding Author

Email: [a.ayorinde.1@warwick.ac.uk](mailto:a.ayorinde.1@warwick.ac.uk)

Warwick Medical School, University of Warwick, Coventry, United Kingdom

**Word count:** 4173

**Keywords:** Health inequalities, infectious diseases, protected characteristics, socio-economic, inclusion health

## ABSTRACT:

**Objectives:** The aim of this systematic overview of reviews was to synthesise available evidence on inequalities in infectious disease based on three dimensions of inequalities; inclusion health groups, protected characteristics, and socioeconomic inequalities.

**Methods:** We searched Medline, Embase, Web of Science and Open Grey databases in November 2021. We included reviews published from the year 2000 which examined inequalities in the incidence, prevalence or consequences infectious diseases based on the dimensions of interest. Our search focused on tuberculosis, human immunodeficiency virus, sexually transmitted infections, Hepatitis C, vaccination, and antimicrobial resistance. However, we also included eligible reviews of any other infectious diseases. We appraised the quality of reviews using the Assessment of Multiple Systematic Reviews version 2 (AMSTAR2) checklist. We conducted a narrative data synthesis.

**Results:** We included 108 reviews in our synthesis covering all the dimensions of inequalities for most of the infectious disease topics of interest, however the quality and volume of review evidence and consistency of their findings varied. The existing literature reviews provides strong evidence that people of inclusion health groups and lower socio-economic status are consistently at higher risk of infectious diseases, antimicrobial resistance, and incomplete/delayed vaccination. In the protected characteristics dimension, ethnicity and sexual orientation are important factors contributing to inequalities across the various infectious disease topics included in this overview of reviews.

**Conclusion:** We identified many reviews that provide evidence of various types of health inequalities in different infectious diseases, vaccination, and antimicrobial resistance. We also highlight areas where reviews may be lacking. The commonalities in the associations and their directions suggest it might be worth targeting interventions for some high risk-groups that may have benefits across multiple infectious disease outcomes rather than operating purely in infectious disease siloes.

## STRENGTHS AND LIMITATIONS OF THIS STUDY

- The protocol used for this systematic overview of reviews was pre-designed and registered in advance.
- We had wide inclusion criteria including various dimensions of inequalities across several key infectious diseases, providing a broad overview of inequalities in infectious diseases, especially those relevant to high-income countries.
- This overview focussed on tuberculosis, human immunodeficiency virus, sexually transmitted infections, Hepatitis C, vaccination, and antimicrobial resistance, however, we also included evidence from other infectious diseases except COVID-19.
- We used AMSTAR2 to assess the methodological quality of each of the included reviews, however, some of the included reviews are not systematic reviews for which AMSTAR2 was designed.
- Because this is an overview of reviews, we are unable to incorporate evidence within primary studies that have not been synthesised in reviews, which means there may be evidence we are missing.

## INTRODUCTION

The World Health Organisation regards experiencing the highest possible standard of health as a fundamental human right of every individual regardless of personal or social circumstances [1]. Nevertheless, avoidable inequalities exist in the prevalence of diseases and illnesses, general health status, and access to health care between various social groups [2]. A complex interaction between structural (for example, income and wealth distribution) and individual-level (for example, health behaviours and living conditions) determinants of health contributes to the increased vulnerability to poorer health among particular social groups [3, 4].

Infectious diseases pose a significant health burden with substantial health inequalities globally [5]. In the United Kingdom (UK), infectious diseases constitute 7% of deaths alongside 4% of lost life years [6]. The economic burden of infectious diseases in the UK is estimated to be around £30 billion per year [6]. Although infectious diseases impose substantial, negative health and economic consequences within populations, many infectious diseases are vaccine-preventable and avoidable through adequate control measures [7]. However, some groups remain under vaccinated [8] and other control measures may be difficult or impossible to implement for some, depending on circumstances [9]. Traditionally, policy makers often target infectious diseases individually, but it is known that specific groups are often at higher risks regardless of specific infectious diseases [10-14]. In efforts to tackle the observed disparities and to reduce the burden of infectious diseases, a strategic approach that tackles infectious diseases among high-risk groups is required [15]. To inform the development of needs-tailored public health policies and initiatives to achieve this goal, a comprehensive synthesis of evidence is required, highlighting the inequalities in infectious diseases according to varying personal and social characteristics.

This project was commissioned by Public Health England (PHE) to gain an overview of the available evidence on health inequalities relating to key infectious disease topics in the UK from a population perspective. PHE had specific interest in three dimensions of inequalities; inclusion health groups (socially excluded and vulnerable populations), protected characteristics, and socioeconomic inequalities. The infectious disease topics of interest were TB, HIV, STIs, HCV, vaccination, and antimicrobial resistance (AMR). Therefore, the aim of this systematic overview of reviews was to describe the existing literature, relevant to the UK, relating to inequalities in the prevalence/incidence of key infectious disease topics as specified by PHE.



## METHODS

We conducted a systematic overview of reviews, pre-registered in PROSPERO, an international prospective register of systematic reviews (2020 CRD42020220203 [https://www.crd.york.ac.uk/prospERO/display\\_record.php?ID=CRD42020220203](https://www.crd.york.ac.uk/prospERO/display_record.php?ID=CRD42020220203)).

### Patient and public involvement

This study had no direct patient or public engagement.

### Search strategy and study selection

We developed a search strategy using synonyms and MeSH terms for inequalities, inclusion health groups, protected characteristics and socioeconomic factors which were combined with synonyms and MeSH terms for infectious diseases and synonyms for reviews (online supplemental file 1). We searched electronic databases from inception to November 2021; Medline, Embase, Web of Science and to identify relevant grey literature we searched Open Grey database (<http://www.opengrey.eu/>) and contacted experts in our network.

We exported citations into Endnote, removed duplicates and then exported them into a web-tool, Rayyan (<https://www.rayyan.ai/>) to facilitate citation screening. Articles were screened against pre-defined eligibility criteria (Table 1). Titles and abstracts were screened by a single reviewer and 10% were double screened by a second reviewer. Full texts of the potentially relevant articles were obtained and screened independently by two reviewers. Discrepancies were resolved by discussion.

Table 1: Eligibility Criteria

| Inclusion Criteria                                                                                                                                                                                                                                                                                                                                                                                                                                                                                                                                                                                                                                                                                                                                                                                                                                                                                                                                                                                                                                                                                                                                                                                                                                                                                          | Exclusion Criteria                                                                                                                                                                                                                                                                                                                                                                                                                                                                                                                                                                               |
|-------------------------------------------------------------------------------------------------------------------------------------------------------------------------------------------------------------------------------------------------------------------------------------------------------------------------------------------------------------------------------------------------------------------------------------------------------------------------------------------------------------------------------------------------------------------------------------------------------------------------------------------------------------------------------------------------------------------------------------------------------------------------------------------------------------------------------------------------------------------------------------------------------------------------------------------------------------------------------------------------------------------------------------------------------------------------------------------------------------------------------------------------------------------------------------------------------------------------------------------------------------------------------------------------------------|--------------------------------------------------------------------------------------------------------------------------------------------------------------------------------------------------------------------------------------------------------------------------------------------------------------------------------------------------------------------------------------------------------------------------------------------------------------------------------------------------------------------------------------------------------------------------------------------------|
| <p><i>Population:</i> Review including studies from the UK population or other high-income countries.</p> <p><i>Exposure:</i></p> <ul style="list-style-type: none"> <li>• Socioeconomic status: this includes education, income, occupation, social class, and deprivation measured at individual or aggregated level.</li> <li>• Protected characteristics: age, disability, gender reassignment, marriage and civil partnership, pregnancy and maternity, race, religion or belief, sex, and sexual orientation.</li> <li>• Inclusion health groups: vulnerable migrants, people experiencing homelessness and rough sleeping, people who engage in sex work, and Gypsy Roma and Traveller communities.</li> </ul> <p><i>Outcome:</i> Inequalities relating to incidence, prevalence, and consequences of infectious diseases. Despite specific interest in TB, HIV, STIs, HCV, immunisation, and AMR, we included reviews relating to any infectious diseases, except reviews focused on COVID-19.</p> <p><i>Types of reviews:</i> Any literature review which reports all the following (a) explicit objectives, (b) clear search strategies and (c) eligibility criteria.</p> <p><i>Publication date:</i> Published from the year 2000 onwards.</p> <p><i>Language:</i> No language restrictions.</p> | <p>We excluded reviews of qualitative studies and articles that are not systematic reviews as defined above. We excluded review protocols, but we searched the titles to check if the findings had been published. We excluded reviews on COVID-19, as advised by PHE, to avoid overlap with other reviews. We also excluded articles focussed on travel-related infections. Reviews which excluded the UK in their eligibility criteria or had not included populations relevant to the UK population (for example, papers where all results were from low-income countries) were excluded.</p> |

## Data extraction

We designed and piloted a data extraction form in Microsoft Excel to extract information including: first author's last name, publication year, corresponding author's country, review methodology,

1  
2  
3 inclusion and exclusion criteria, infectious disease(s), population(s) included, dimension(s) of  
4 inequality, outcomes, conclusions, and strengths and limitations. Data extraction was performed by  
5 one reviewer and checked by another.  
6  
7  
8  
9

## 10 **Quality assessment**

11  
12

13 Two reviewers independently assessed review quality using the Assessment of Multiple Systematic  
14 Reviews version 2 (AMSTAR2) checklist [16]. Disagreements were resolved by discussion. Due to  
15 the multidimensional nature of this overview of reviews, inclusion of various types of reviews with  
16 diverse aims and outcomes, we did not perform overall rating of confidence for each review. To  
17 provide a sense of overall quality of evidence, we calculated the proportion of reviews which  
18 fulfilled each AMSTAR-2 item.  
19  
20  
21  
22  
23  
24

## 25 **Data synthesis**

26  
27  
28

29 We tabulated the dimension of inequalities against the infectious disease topic to create an evidence  
30 matrix which was used to highlight areas where reviews already exist and where there may be gaps.  
31 Data were synthesised narratively based on the dimensions of inequalities.  
32  
33  
34  
35

## 36 **RESULTS**

37  
38

39 Figure 1 shows the study selection. We retrieved 14713 citations from the electronic database  
40 searches and 11135 titles and abstracts were screened after the removal of duplicates. One of the  
41 experts we contacted sent an article which highlighted UK-based evidence for several inclusion  
42 health groups, but did not fulfil other criteria for inclusion [17]. After examining 437 full text articles  
43 against the eligibility criteria, 108 were included in our synthesis.  
44  
45  
46  
47  
48

49 Characteristics of included reviews are summarised in online supplemental file 2. Included reviews  
50 were published between 2005-2020 with 95% published after 2010. Fifty-eight (54%) included meta-  
51 analysis while the remaining studies used narrative/descriptive synthesis approaches. The reviews  
52 covered the three dimensions of inequalities across various infectious disease topics. A summarised  
53 version of the evidence matrix, showing how many reviews were identified for each cell is presented  
54 in Figure 2. The full evidence matrix is presented in online supplemental file 3.  
55  
56  
57  
58  
59  
60

### Methodological quality of included reviews

Assessment of the methodological quality of each included review is presented in online supplemental file 4 and the proportion of included reviews that met each AMSTAR2 Criteria are presented in Figure 3. Many reviews fulfilled criteria such as including components of PICOS in their research questions and inclusion criteria (87%), performing duplicate study selection (55%), discussing heterogeneity (70%) and disclosure of conflicts of interest (83%). Only a few of the reviews (19%) clearly indicated that the review methods were established *a priori* and 37% performed risk of bias assessment using satisfactory techniques. Although only 24% of the included reviews were judged to have comprehensive literature search, 59% were classed as “partial yes” for literature search often due to lack of grey literature searches. Justification of the exclusions for each excluded study were not presented and none reported funding sources for included studies. These two criteria are more common among Cochrane reviews of interventions and are generally omitted from most published non-Cochrane reviews.

### Evidence Relating to Inclusion Health Groups

Of the 108 included reviews, 43 reported on inclusion health groups. The evidence is generally consistent across these groups showing that people who belong to inclusion health groups are often at higher risk of infectious diseases, AMR and under-vaccination. For example, many reviews reported on general migrants [14, 18-41], and vulnerable migrants such as asylum seekers, refugees, and trafficked sex workers [14, 19, 22, 28, 34, 42, 43]. The reviews often reported that migrants have a higher risk of infectious diseases than the host population, though the magnitude of the association may vary for different geographical regions and different infectious diseases. For example, in the UK, 35% of people with chronic HCV are migrants despite being just 9% of the general population [20]. Other reviews showed that HIV and STIs were more prevalent among migrants [31, 32]. The prevalence of HIV-TB co-infection was higher among immigrants compared with nationals in various countries including England and Wales although the immigrant group reported slightly better survival/lower mortality which authors commented may be due to the possible healthy migrant effect [37]. In another review, migrants were reported to be at higher risk of TB death [26]. Evidence from the UK showed an increasing number of migrants contracted HIV after they arrived in the UK between 2002-2011 suggesting that the higher prevalence of infectious diseases among migrants is not limited to pre-migration infection [27]. A meta-analysis showed that refugees were more likely to have chronic HBV compared to general migrants (Odds ratio (OR) 1.42 95% CI 1.01 to 1.99) [34].

1  
2  
3 Some reviews reported no clear evidence that immigrant sex workers had higher risk of HIV and  
4 STIs compared with non-migrant sex workers [40, 41]. However, one reported that trafficked sex  
5 workers were at a higher risk of HIV and STIs compared to female sex workers in general [43]. The  
6 prevalence of *Helicobacter pylori* among immigrants varied according to continent of origin and the  
7 prevalence is higher among migrants compared with their children [29].  
8  
9

10  
11  
12  
13 Several reviews reported lower vaccination rates or delayed/incomplete vaccination among migrants  
14 and refugees in Europe [25, 28, 30, 36]. However, the association may vary depending on the type of  
15 migrant group. For example, authors have reported that the uptake of vaccination among refugees  
16 was lower compared with asylum seekers [19]. In a meta-analysis, migrants had increased odds of  
17 MDR-TB incidence compared to non-migrants (OR 3.91, 95% CI 2.98–5.14) [38]. In two other  
18 reviews, AMR carriage and infection were reported to be more prevalent among migrants in Europe  
19 [21, 42].  
20  
21  
22  
23  
24  
25

26  
27 Three reviews examined Gypsy Roma and Traveller communities [8, 44, 45]. One showed that Roma  
28 and Irish Travellers in the UK were often under-vaccinated [8]. Another reported that Roma in  
29 Barcelona had a TB incidence 5.3 times greater than Spain's national TB incidence [45]. Higher  
30 prevalence of HIV has also been reported among Iranian, Roma, and Peruvian Indigenous  
31 populations compared to the general population [44]. We did not identify any reviews that examined  
32 the association between being from Gypsy Roma or Traveller communities and AMR.  
33  
34  
35  
36  
37  
38  
39

40 We identified eight reviews which examined the association of homelessness with infectious  
41 diseases. They all reported a higher risk of various infectious diseases or AMR among people  
42 experiencing homelessness compared to those who were not homeless [26, 35, 46-51]. We did not  
43 identify any reviews that examined the association between vaccination and homelessness. Eight  
44 reviews explored infectious disease risks among those engaging in sex work compared to the general  
45 population [39, 43, 52-57]. The evidence suggests higher risks of various infectious diseases, such as  
46 HBV, HDV, HIV and HPV, among sex workers [39, 52-54, 56, 57]. A review which examined  
47 factors associated with HBV vaccination among MSM found mixed evidence relating to sexual risk-  
48 taking including involvement in sex trade [55]. We did not identify any reviews exploring the  
49 association of being a sex worker with AMR.  
50  
51  
52  
53  
54  
55  
56  
57  
58  
59  
60

### Evidence Relating to Protected Characteristics

Seventy-four reviews reported on protected characteristics, however, our synthesis only found clear evidence for inequalities by ethnicity and sexual orientation. Inequalities in infectious diseases relating to race and ethnicity were explored in 19 reviews [26, 30, 33, 36, 49, 51, 55, 58-69]. The available evidence suggests a higher rate of various infectious diseases such as TB, HIV, and STIs and under-vaccination in people who belong to an ethnic minority group. For example, a meta-analysis found that recent transmission of TB was associated with being of ethnic minority (OR 3.03, 95% CI 2.21- 4.16) [49]. A meta-analysis indicated that on average young Black women were less likely to initiate HPV vaccination than young White women (combined OR: 0.89, 95% CI: 0.82–0.97) [61]. In a meta-analysis of studies from Europe, children from parents of ethnic minorities (compared to the majority) were less likely to be vaccinated for measles, mumps and rubella (OR 0.89, CI 0.86–0.93 in a fixed effect model) [67]. However, the effect disappeared in the random effects model (OR 1.03, 95% CI 0.79–1.34), probably due to heterogeneity between studies [67]. Seasonal influenza vaccine uptake among older people was associated with being White (combined OR 1.30, 95% CI 1.14–1.49) [30]. Only one review on race and AMR was identified and it reported that people from some Black ethnic groups in the USA and Europe, and Aboriginal ethnic groups living in Canada and Australia are less likely to have AMR-Neisseria gonorrhoea (AMR-NG) than the White majority population [58]. Ten included reviews examined the association of sexual orientation with infectious disease topics, mostly focused on MSM [24, 51, 53, 54, 56, 58, 70-73]. In a review, MSM were found to be at risk of acquiring HIV post-migration [71]. However, in a network meta-analysis the highest risk of advanced HIV disease among people living with HIV was found in those with heterosexual contact compared with MSM as well as injection drug use [70]. Some reviews examined disparities of HIV in MSM but did not compare risk between MSM and other populations [33, 64]. Other infectious diseases such as HBV, HCV and HDV are also higher in MSM than in the general population [24, 54, 72]. AMR-NG was reported to be more common among MSM than heterosexual men in England and Wales (OR 5.47, 95% CI 3.99–7.48) [58]. We did not identify any reviews which assessed the association of sexual orientation with vaccination.

From the reviews identified, inequalities in infectious disease topics based on other protected characteristics, such as age and sex are mixed, and for other protected characteristics the synthesised evidence is scant and inconclusive. The association of infectious diseases with age has been reported in various reviews [21, 22, 30, 36, 49, 51, 55-60, 62, 63, 65, 67, 69, 74-103]. However, the association varied. Infectious diseases such as HIV, STIs, and TB have been reported to be

1  
2  
3 associated with younger age in some reviews [49, 58, 76, 79, 88], while HCV and Hepatitis E (HEV)  
4 were associated with older age [22, 82, 95]. Seasonal influenza vaccine uptake was higher in older  
5 age groups [30, 65, 69, 100]. A review reported that many studies found an association between  
6 HBV vaccination and younger age [55]. Suboptimal vaccination compliance was associated with  
7 mother's younger age [36, 63]. On the other hand, another review reported that HPV vaccine  
8 intention and initiation were positively associated with younger parent's age [62]. Four included  
9 reviews examined the association of AMR with age [21, 58, 102, 103]. In one review, MDR TB was  
10 associated with being younger than 65 years (pooled OR 2.53, 95% CI 1.74 – 4.83) [21] while  
11 another review reported that AMR-NG was more common in those 25 years or older than in younger  
12 adults [58]. Overall, age group classifications often varied between reviews which made it difficult to  
13 identify a clear pattern.  
14  
15  
16  
17  
18  
19  
20  
21  
22  
23

24 Twenty-eight reviews explored inequalities based on sex [21, 39, 40, 46, 48, 49, 51, 53, 58, 65, 67,  
25 74, 78, 82, 84, 85, 87, 89, 90, 93, 96, 100, 104-109], but the findings varied depending on specific  
26 infectious disease. For example, TB transmission was reported to be associated with being male [48,  
27 49] while the prevalence of chlamydia was slightly higher in females than in males [78]. Other  
28 reviews reported that seasonal influenza vaccine uptake is often higher in elderly men compared to  
29 elderly women, but the differences are not statistically significant in multivariate regression analysis  
30 [65]. A meta-analysis of studies from Europe showed that male patients were more likely to have  
31 MDR TB (OR 1.38, 95% CI 1.16 – 1.65) [21].  
32  
33  
34  
35  
36  
37  
38

39 Six reviews described the influence of being married or in civil partnerships on vaccination [25, 30,  
40 65, 67, 69, 96]. Generally, those who were married had higher vaccination uptake although some  
41 studies found no association or higher uptake among those who were never married. No included  
42 review examined inequalities in infectious disease prevalence or AMR based on marital status. Only  
43 four included reviews reported the prevalence of infectious diseases (HBV, HCV, latent or acute  
44 toxoplasma infection) in pregnant women compared with the general population and the findings  
45 were mixed [22, 24, 56, 110]. We found no reviews that examined the association of pregnancy with  
46 vaccination uptake or risk of AMR.  
47  
48  
49  
50  
51  
52  
53

54 Six reviews reported on inequalities relating to religion and meningococcal disease, as well as  
55 vaccination [8, 25, 59, 61, 63, 90]. A recent meta-analysis of two studies showed that religious  
56 events attendance was significantly associated with a decreased risk of invasive meningococcal  
57 disease (OR 0.47 (95% CI, 0.28–0.79, p 0.0004) [90]. Meta-analyses showed no strong evidence  
58  
59  
60

1  
2  
3 between various vaccination and religion including frequency of attendance at a place of worship  
4 [25, 61]. Jewish Orthodox people in the UK and Belgium and Orthodox Protestants in the  
5 Netherlands were described as being under-vaccinated [8]. We did not identify any studies on the  
6 association of religion with the risk of any of the key infectious diseases or AMR.  
7  
8  
9

10  
11 Two reviews examined the association between gender reassignment and the risk of infectious  
12 diseases (HIV and HBV) [53, 56]. The prevalence of HIV was significantly higher among  
13 transgender female sex workers compared with biologically female sex workers (RR = 4.02, 95% CI  
14 1.60 - 10.11) [53]. However, in another review, transgender persons had lower prevalence of HBV  
15 compared to other groups such as sex workers, injection drug users, MSM and pregnant women [56].  
16 We did not identify any reviews examining the association of gender reassignment with other  
17 infectious diseases of interest, vaccination or AMR.  
18  
19  
20  
21  
22  
23

24  
25 We did not identify any review that reported the association of disability with our key infectious  
26 diseases topics. However, we identified one review which reported that disability was associated  
27 with a higher incidence of listeriosis [111].  
28  
29  
30  
31

### 32 **Evidence Relating to Socioeconomic Inequalities**

33  
34  
35 Fifty reviews explored socioeconomic status. The evidence consistently shows that those with lower  
36 level of income, lower educational attainment, unemployment, higher area level deprivation, lower  
37 socioeconomic status, or poor living situations are at higher risk of infectious diseases, AMR and  
38 lower vaccine uptake. For example, many reviews highlighted that low income, poverty and  
39 unemployment were associated with various infectious diseases including, HIV, STIs, TB, HBV and  
40 HCV among others [26, 27, 35, 39, 64, 75, 82, 84, 85, 90, 94, 111-114].  
41  
42  
43  
44  
45  
46

47  
48 Level of education, income or occupation are often associated with vaccination uptake [19, 25, 30,  
49 36, 55, 60, 61, 63, 65, 67, 69, 100, 115-119]. Reviews have also reported an association of MDR-TB  
50 and AMR with lower level of income or education [47, 120, 121]. Many reviews examined the  
51 association of infectious disease topics of interest with areal level socioeconomic status [25, 30, 36,  
52 59, 60, 63, 65, 69, 100, 116, 119, 122], deprivation [61, 65, 66, 75, 78, 111, 119, 123], or living  
53 situation [30, 36, 44, 47, 49, 51, 60, 65, 67, 69, 84, 85, 87, 90, 94, 96, 101, 105, 113, 121]. One meta-  
54 analysis showed significant association between neighbourhood deprivation and chlamydia infection  
55 (pooled OR 1.76, 95 % CI: 1.15–2.71) [78]. In another meta-analysis, TB was associated with  
56  
57  
58  
59  
60



1  
2  
3 residing in an urban area (OR 1.52, 95%CI 1.35–1.72) [49]. Those living in overcrowded or poor  
4 housing conditions had higher risk of TB [44]. AIDS mortality is significantly associated with lower  
5 socioeconomic status [122]. Group A Streptococcal infection, gastrointestinal infections and  
6 meningococcal disease were associated with poor living conditions [75, 84, 85, 90, 111, 113].  
7  
8  
9

10  
11 Two included reviews explored the association between AMR and areal level deprivation [47, 121].  
12 Although the evidence is scant, the findings suggests that those living in deprived areas or poor  
13 living conditions may be at higher risk of AMR.  
14  
15  
16

## 17 18 19 **DISCUSSION**

20  
21 This overview of reviews provides a broad synopsis of three dimensions of inequalities (inclusion  
22 health groups, protected characteristics, and socio-economic inequalities) across several infectious  
23 disease topics. We synthesised the existing evidence based on the dimension of inequalities. Of the  
24 three dimensions of inequalities assessed, the evidence relating to people in the inclusion health  
25 groups is the most consistent although the volume of evidence identified for each group varied. Most  
26 of the reviews identified under this dimension were on migration status, with a higher prevalence of  
27 infectious diseases, AMR and lower vaccine uptake among migrants compared to non-migrants.  
28 Vulnerable migrants (such as refugees, asylum-seekers, and trafficked persons) are at higher risk  
29 when compared to general migrants and the size of inequalities varied depending on the country of  
30 origin. Although few reviews were identified for the remaining inclusion health groups, the evidence  
31 suggests that homelessness is associated with risk of infectious diseases and AMR; Gypsy Roma/  
32 Traveller communities are often under vaccinated and are also at greater risk of infectious diseases;  
33 and people who engage in sex work are at greater risk of some infectious diseases.  
34  
35  
36  
37  
38  
39  
40  
41  
42  
43  
44  
45

46 There is a plethora of evidence from reviews showing higher prevalence of infectious diseases and  
47 under-vaccination among minority ethnic groups. We also identified several reviews suggesting  
48 higher prevalence of infectious diseases and AMR among MSM. These suggest that ethnicity and  
49 sexual orientation are important protected characteristics and targeting or tailoring interventions for  
50 such groups may be beneficial to reduce inequalities in infectious diseases. It is important to note that  
51 there is inequality in access to vaccinations as shown in reviews included in this overview of reviews  
52 and beyond. Since many infectious diseases are vaccine preventable, identified inequalities in  
53 infectious diseases that we have noted in this overview of reviews, may also be related to inequalities  
54 in access to vaccination.  
55  
56  
57  
58  
59  
60

1  
2  
3  
4  
5 Many reviews examined the association with age and sex, however, the identified associations varied  
6 depending on the specific infectious disease or type of vaccination. In addition, for most of the  
7 reviews, the comparator age groups were often unclear. Therefore, we are not able to identify  
8 specific age groups with higher risk across various infectious disease topics. Other factors besides  
9 equity issues may contribute significantly to associations with age. For example, people in the most  
10 sexually active age groups are more likely to contract STIs whereas people of older ages, where  
11 immunity is weaker, are more likely to get infectious diseases associated with low immunity. Also,  
12 vaccinations are often offered at specific ages so it is expected that uptake would be higher among  
13 those groups that are targeted. However, it is important to highlight that we found evidence  
14 suggesting that childhood vaccination compliance is lower for those with younger mothers/parents  
15 [36, 59, 63]. Based on this review, age and sex may be important for some infectious diseases but the  
16 group at higher risk may vary across diseases.  
17  
18  
19  
20  
21  
22  
23  
24  
25  
26

27 Reviews exploring marital status focused on vaccination, particularly seasonal influenza vaccine in  
28 older adults, tetanus vaccination among pregnant women and MMR vaccination in children. Reviews  
29 generally reported higher vaccination uptake among adults who are married and children whose  
30 parents are married. It is not possible to draw a conclusion regarding the association of religion,  
31 disability, transgenderism, and pregnancy with infectious diseases based on the findings of this  
32 review as the synthesised evidence is scant and often inconsistent. More evidence is therefore needed  
33 to be able to establish the presence and direction of any associations of these factors with infectious  
34 diseases.  
35  
36  
37  
38  
39  
40  
41  
42

43 Several reviews provide compelling evidence of higher risk of infectious diseases, AMR, and lower  
44 vaccination uptake among those with lower level of income, lower educational attainment,  
45 unemployment, higher area level deprivation, lower socioeconomic status, and poor living situations.  
46 Although most of the evidence in this dimension is on vaccination, those of lower socioeconomic  
47 groups are often at higher risk from infectious diseases and should be targeted for intervention.  
48  
49  
50  
51  
52

### 53 **Strengths and limitations**

54  
55

56 The protocol used to guide the conduct of this review was designed a priori. We conducted a  
57 comprehensive literature search of four electronic databases with no language limits and searched for  
58 grey literature. Data extraction was checked by a second reviewer to improve accuracy and quality  
59  
60

1  
2  
3 assessments were performed by two reviewers independently. Due to the timeframe required for the  
4 work, we could not complete all the initial titles and abstract screening in duplicate, however, full  
5 texts of potentially relevant reviews were independently screened by two reviewers. Despite our best  
6 efforts, we acknowledge that some relevant reviews may have been missed in the study selection  
7 process. The lack of synthesised evidence observed in some areas does not necessarily mean a lack  
8 of evidence. This is because there may be primary studies in those areas which have not been  
9 synthesised in reviews and meta-analyses. Also, this project focussed on specific infectious disease  
10 topics and we included specific search terms for those topics in the search strategy and included  
11 broad terms for infectious diseases. This allowed us to include other infectious diseases that were  
12 identified in our search to capture evidence of health inequalities from various infectious diseases  
13 (excluding COVID-19). Therefore, this is not intended to provide a comprehensive overview of  
14 reviews in those topics which are not the focus of this project. Furthermore, some underserved  
15 populations (such as people who inject drugs and prisoners) are not covered in this overview as these  
16 are beyond the scope of the work. Notwithstanding, we believe this provides a useful summary of  
17 available evidence relating to inequalities in infectious diseases relevant to high-income countries  
18 and highlights areas where evidence may be lacking or minimal.  
19  
20  
21  
22  
23  
24  
25  
26  
27  
28  
29  
30  
31

32 The quality of the included reviews varied significantly as we included various types of reviews, and  
33 some were not necessarily systematic reviews for which AMSTAR2 is designed. Heterogeneity  
34 between studies was a limitation reported in many of the included reviews where meta-analyses were  
35 performed, therefore, pooled estimates should be interpreted with caution.  
36  
37  
38  
39  
40  
41  
42

### 43 **Conclusion**

44  
45  
46 Overall, we provide evidence from many papers with accordant findings, of groups consistently at  
47 higher risk of infectious diseases, AMR and under-vaccination. Developing targeted interventions for  
48 high-risk groups rather than focusing on individual infections could contribute significantly to  
49 reducing infectious disease burden. This reviews also highlights important evidence gaps that should  
50 be considered when commissioning future evidence syntheses or primary studies.  
51  
52  
53  
54  
55

### 56 **Figure Legends**

57  
58 Figure 1: PRISMA flow diagram for study selection.  
59  
60

1  
2  
3 Figure 2: Matrix showing the number of reviews identified for each dimension of inequality and  
4 infectious disease topic. Colour ranges from red which indicates where no review was identified, up  
5 to green for a maximum number of reviews (19).  
6  
7

8 Figure 3: AMSTAR2 results for included reviews  
9

## 10 11 **Acknowledgements**

12  
13  
14  
15 We would like to acknowledge colleagues from the University of Warwick, Samantha Johnson who  
16 supported us in developing the search strategy and Dr Yen-Fu Chen who helped with language  
17 translation. We are also grateful to those who responded to our request for information.  
18

19  
20 We also like to thank Dr Ines Campos-Matos from the UK Health Security Agency (UKHSA) and  
21 Office of Health Improvement and Disparities, Katy Sinka from the UKHSA, and Dr Rebecca  
22 Wilkinson from Hampshire Hospitals Foundation Trust for their support and guidance through the  
23 project. Abimbola Ayorinde and Iman Ghosh are funded by the National Institute for Health and  
24 Social Care Research (NIHR) Applied Research Collaboration (ARC) West Midlands, grant number  
25 NIHR200165. The views expressed are those of the author(s) and not necessarily those of the NIHR,  
26 the Department of Health and Social Care or Public Health England.  
27  
28  
29  
30  
31  
32

33  
34 **Contributors:** AAA, IG, BB, NM and OOy contributed to the design of the review. AAA, IG, IA,  
35 IZ, MS, EM, SSA, OOI and SR contributed to data collection, including selection of studies, data  
36 extraction and quality assessment. AAA, IG, BB, NM and OOy contributed to the data synthesis and  
37 interpretation of the data. AAA wrote the first draft of the paper. All authors contributed to revising  
38 the draft and approved the final manuscript.  
39  
40  
41  
42  
43  
44

45 **Funding:** This work was funded by Public Health England. Abimbola Ayorinde and Iman Ghosh are  
46 funded by the National Institute for Health and Social Care Research (NIHR) Applied Research  
47 Collaboration (ARC) West Midlands, grant number NIHR200165.  
48

49 **Competing interest:** None declared

50 **Patient consent for publication:** Not required

51  
52  
53 **Ethical Approval Statement:** This study does not involve human participants. This is a systematic  
54 overview of review of existing literature. Ethics approval is not applicable.  
55

56  
57 **Data Sharing Statement:** All data relevant to the study are included in the article or uploaded as  
58 online supplemental information.  
59  
60

## REFERENCES

1. World Health Organization. Human rights and health 2017 [Available from: <https://www.who.int/news-room/fact-sheets/detail/human-rights-and-health>].
2. Marmot M. Inequalities in health. *New England Journal of Medicine*. 2001;345(2):134-5.
3. Marmot M, Wilkinson R. *Social determinants of health*. Oxford 2005.
4. Graham H. Social determinants and their unequal distribution: clarifying policy understandings. *Milbank Q*. 2004;82(1):101-24.
5. Quinn SC, Kumar S. Health inequalities and infectious disease epidemics: a challenge for global health security. *Biosecurity and bioterrorism: biodefense strategy, practice, and science*. 2014;12(5):263-73.
6. House of Parliament. UK Trends in Infectious Disease. In: *technology*. Poosa, editor. 545 ed2017.
7. CDC Centre for Disease Control and Prevention. *Vaccines and Preventable Diseases* 2016 [Available from: <https://www.cdc.gov/vaccines/vpd/index.html>].
8. Fournet N, Mollema L, Ruijs WL, Harmsen IA, Keck F, Dur, et al. Under-vaccinated groups in Europe and their beliefs, attitudes and reasons for non-vaccination; two systematic reviews. *BMC Public Health*. 2018;18(1):196.
9. Rotheram S, Cooper J, Barr B, Whitehead M. How are inequalities generated in the management and consequences of gastrointestinal infections in the UK? An ethnographic study. *Social Science & Medicine*. 2021;282:114131.
10. Hughes GJ, Gorton R. Inequalities in the incidence of infectious disease in the North East of England: a population-based study. (1469-4409 (Electronic)).
11. Public Health England. *Health protection report, Weekly report*; 2016. Contract No.: 22.
12. Baker EH. Socioeconomic Status, Definition. *The Wiley Blackwell Encyclopedia of Health, Illness, Behavior, and Society*. 2014:2210-4.
13. Public Health England. *Public Health Matters* [Internet]2019. [16th April, 2021]. Available from: <https://publichealthmatters.blog.gov.uk/2019/03/22/tackling-tuberculosis-in-under-served-populations/>.
14. Chernet A, Utzinger J, Sydow V, Probst-Hensch N, Paris DH, Labhardt ND, et al. Prevalence rates of six selected infectious diseases among African migrants and refugees: a systematic review and meta-analysis. *European Journal of Clinical Microbiology & Infectious Diseases*. 2018;37(4):605-19.
15. Semenza JC, Giesecke J. Intervening to reduce inequalities in infections in Europe. *Am J Public Health*. 2008;98(5):787-92.
16. Shea BJ, Reeves BC, Wells G, Thuku M, Hamel C, Moran J, et al. AMSTAR 2: a critical appraisal tool for systematic reviews that include randomised or non-randomised studies of healthcare interventions, or both. *BMJ*. 2017;358:j4008.
17. Stevens A. Putting high-risk under-served populations at the centre of joint efforts to eliminate Hepatitis B and C, Tuberculosis and HIV and halt the rise in sexually transmitted infections PHE *Infectious Diseases Strategy 2020-2025*2020.
18. Chan IHY, Kaushik N, Dobler CC. Post-migration follow-up of migrants identified to be at increased risk of developing tuberculosis at pre-migration screening: a systematic review and meta-analysis. *The Lancet Infectious Diseases*. 2017;17(7):770-9.
19. De Vito E, Parente P, de Waure C, Poscia A, Ricciardi W. A review of evidence on equitable delivery, access and utilization of immunization services for migrants and refugees in the WHO

- 1  
2  
3 European Region. WHO Regional Office for Europe WHO Health Evidence Network Synthesis  
4 Reports. 2017.
- 5 20. Falla AM, Ahmad AA, Duffell E, Noori T, Veldhuijzen IK. Estimating the scale of chronic  
6 hepatitis C virus infection in the EU/EEA: a focus on migrants from anti-HCV endemic countries.  
7 2018(1471-2334 (Electronic)).
- 8 21. Faustini A, Hall AJ, Perucci CA. Risk factors for multidrug resistant tuberculosis in Europe: a  
9 systematic review. *Thorax*. 2006;61(2):158-63.
- 10 22. Greenaway C, Thu Ma A, Kloda LA, Klein M, Cnossen S, Schwarzer G, et al. The  
11 Seroprevalence of Hepatitis C Antibodies in Immigrants and Refugees from Intermediate and High  
12 Endemic Countries: A Systematic Review and Meta-Analysis. *PLoS ONE [Electronic Resource]*.  
13 2015;10(11):e0141715.
- 14 23. Sandgren A, Schepisi MS, Sotgiu G, Huitric E, Migliori GB, Manissero D, et al. Tuberculosis  
15 transmission between foreign- and native-born populations in the EU/EEA: a systematic review.  
16 *European Respiratory Journal*. 2014;43(4):1159-71.
- 17 24. Hahne SJM, Veldhuijzen IK, Wiessing L, Lim TA, Salminen M, van de Laar M. Infection  
18 with hepatitis B and C virus in Europe: a systematic review of prevalence and cost-effectiveness of  
19 screening. *Bmc Infectious Diseases*. 2013;13:16.
- 20 25. Jain A, van Hoek AJ, Boccia D, Thomas SL. Lower vaccine uptake amongst older  
21 individuals living alone: A systematic review and meta-analysis of social determinants of vaccine  
22 uptake. *Vaccine*. 2017;35(18):2315-28.
- 23 26. Kawatsu L Fau - Ishikawa N, Ishikawa N. [Socio-economic factors that influence  
24 tuberculosis death among the youth and middle-aged population: a systematic review]. 2014(0022-  
25 9776 (Print)).
- 26 27. Kentikelenis A, Karanikolos M, Williams G, Mladovsky P, King L, Pharris A, et al. How do  
27 economic crises affect migrants' risk of infectious disease? A systematic-narrative review. *European*  
28 *Journal of Public Health*. 2015;25(6):937-44.
- 29 28. Mipatrini D, Stefanelli P, Severoni S, Rezza G. Vaccinations in migrants and refugees: a  
30 challenge for European health systems. A systematic review of current scientific evidence. *Pathogens*  
31 *and Global Health*. 2017;111(2):59-68.
- 32 29. Morais S, Costa AR, Ferro A, Lunet N, Peleteiro B. Contemporary migration patterns in the  
33 prevalence of *Helicobacter pylori* infection: A systematic review. *Helicobacter*. 2017;22(3).
- 34 30. Okoli GN, Lam OLT, Racovitan F, Reddy VK, Righolt CH, Neilson C, et al. Seasonal  
35 influenza vaccination in older people: A systematic review and meta-analysis of the determining  
36 factors. *Plos One*. 2020;15(6):26.
- 37 31. Platt L, Grenfell P, Fletcher A, Sorhaindo A, Jolley E, Rhodes T, et al. Systematic review  
38 examining differences in HIV, sexually transmitted infections and health-related harms between  
39 migrant and non-migrant female sex workers. *Sexually Transmitted Infections*. 2013;89(4):311-9.
- 40 32. Platt L, Jolley E, Rhodes T, Hope V, Latypov A, Reynolds L, et al. Factors mediating HIV  
41 risk among female sex workers in Europe: a systematic review and ecological analysis. *BMJ Open*.  
42 2013;3(7).
- 43 33. Prost A, Elford J, Imrie J, Petticrew M, Hart GJ. Social, behavioural, and intervention  
44 research among people of Sub-Saharan African origin living with HIV in the UK and Europe:  
45 literature review and recommendations for intervention. *AIDS & Behavior*. 2008;12(2):170-94.
- 46 34. Rossi C, Shrier I, Marshall L, Cnossen S, Schwartzman K, Klein MB, et al. Seroprevalence  
47 of chronic hepatitis B virus infection and prior immunity in immigrants and refugees: a systematic  
48 review and meta-analysis. *PLoS ONE [Electronic Resource]*. 2012;7(9):e44611.
- 49 35. Suhrcke M, Stuckler D, Suk JE, Desai M, Senek M, McKee M, et al. The impact of economic  
50 crises on communicable disease transmission and control: a systematic review of the evidence. *PLoS*  
51 *ONE [Electronic Resource]*. 2011;6(6):e20724.
- 52  
53  
54  
55  
56  
57  
58  
59  
60

- 1
- 2
- 3 36. Tauil Mde C, Sato AP, Waldman EA. Factors associated with incomplete or delayed
- 4 vaccination across countries: A systematic review. 2016(1873-2518 (Electronic)).
- 5 37. Tavares AM, Fronteira I, Couto I, Machado D, Viveiros M, Abecasis AB, et al. HIV and
- 6 tuberculosis co-infection among migrants in Europe: A systematic review on the prevalence,
- 7 incidence and mortality. *PLoS ONE* [Electronic Resource]. 2017;12(9):e0185526.
- 8 38. Jackson S, Kabir Z, Comiskey C. Effects of migration on tuberculosis epidemiological
- 9 indicators in low and medium tuberculosis incidence countries: A systematic review. *Journal of*
- 10 *Clinical Tuberculosis and Other Mycobacterial Diseases*. 2021;23(6):100225.
- 11 39. Kabapy AF, Shatat HZ, Abd El-Wahab EA-O. Attributes of HIV infection over decades
- 12 (1982-2018): A systematic review and meta-analysis. *Transbound Emerg Dis* 2020;67(6):2372-88.
- 13 40. McBride B, Shannon K, Strathdee SA, Goldenberg SM. Structural determinants of HIV/STI
- 14 prevalence, HIV/STI/sexual and reproductive health access, and condom use among immigrant sex
- 15 workers globally. *AIDS*. 2021;35(9):1461-77.
- 16 41. Pega FA-O, Govindaraj S, Tran NT. Health service use and health outcomes among
- 17 international migrant workers compared with non-migrant workers: A systematic review and meta-
- 18 analysis. *PloS one*. . 2021;16(6):e0252651.
- 19 42. Nellums LB, Thompson H, Holmes A, Castro-Sanchez E, Otter JA, Norredam M, et al.
- 20 Antimicrobial resistance among migrants in Europe: a systematic review and meta-analysis. *The*
- 21 *Lancet Infectious Diseases*. 2018;18(7):796-811.
- 22 43. Yu YJ, Bruna S, McCarty C. HIV Risk among trafficked women: a systematic review of the
- 23 global literature. *Aids Care-Psychological and Socio-Medical Aspects of Aids/Hiv*. 2020:11.
- 24 44. Cormier M, Schwartzman K, N'Diaye DS, Boone CE, Dos Santos AM, Gaspar J, et al.
- 25 Proximate determinants of tuberculosis in Indigenous peoples worldwide: a systematic review. *The*
- 26 *Lancet Global Health*. 2019;7(1):e68-e80.
- 27 45. Tollefson D, Bloss E, Fanning A, Redd JT, Barker K, McCray E. Burden of tuberculosis in
- 28 indigenous peoples globally: A systematic review. *International Journal of Tuberculosis and Lung*
- 29 *Disease*. 2013;17(9):1139-50.
- 30 46. Aldridge RW, Story A, Hwang SW, Nordentoft M, Luchenski SA, Hartwell G, et al.
- 31 Morbidity and mortality in homeless individuals, prisoners, sex workers, and individuals with
- 32 substance use disorders in high-income countries: a systematic review and meta-analysis. *Lancet*.
- 33 2018;391(10117):241-50.
- 34 47. Alivizda V, Mariano V, Ahmad R, Charani E, Rawson TM, Holmes AH, et al. Investigating
- 35 the impact of poverty on colonization and infection with drug-resistant organisms in humans: a
- 36 systematic review. *Infectious Diseases of Poverty*. 2018;7(1):76.
- 37 48. Beijer U, Wolf A, Fazel S. Prevalence of tuberculosis, hepatitis C virus, and HIV in homeless
- 38 people: a systematic review and meta-analysis. *The Lancet Infectious Diseases*. 2012;12(11):859-70.
- 39 49. Nava-Aguilera E, Andersson N, Harris E, Mitchell S, Hamel C, Shea B, et al. Risk factors
- 40 associated with recent transmission of tuberculosis: systematic review and meta-analysis.
- 41 *International Journal of Tuberculosis and Lung Disease*. 2009;13(1):17-26.
- 42 50. Arum C, Fraser H, Artenie AA, Bivegete S, Trickey A, Alary M, et al. Homelessness,
- 43 unstable housing, and risk of HIV and hepatitis C virus acquisition among people who inject drugs: a
- 44 systematic review and meta-analysis. *The Lancet Public health*. 2021;6(5):e309–e23.
- 45 51. Ly TDA, Castaneda S, Hoang VT, Dao TL, Gautret P. Vaccine-preventable diseases other
- 46 than tuberculosis, and homelessness: A systematic review of the published literature, 1980 to 2020.
- 47 *medRxiv*. 2020:2020.10.28.20220335.
- 48 52. Oldenburg CE, Perez-Brumer AG, Reisner SL, Mimiaga MJ. Transactional Sex and the HIV
- 49 Epidemic Among Men Who have Sex with Men (MSM): Results From a Systematic Review and
- 50 Meta-analysis. *AIDS & Behavior*. 2015;19(12):2177-83.
- 51
- 52
- 53
- 54
- 55
- 56
- 57
- 58
- 59
- 60

53. Operario D, Soma T, Underhill K. Sex work and HIV status among transgender women: systematic review and meta-analysis. *Journal of Acquired Immune Deficiency Syndromes: JAIDS*. 2008;48(1):97-103.
54. Stockdale AJ, Kreuels B, Henrion MYR, Giorgi E, Kyomuhangi I, de Martel C, et al. The global prevalence of hepatitis D virus infection: Systematic review and meta-analysis. *Journal of Hepatology*. 2020;73(3):523-32.
55. Vet R, de Wit JB, Das E. Factors associated with hepatitis B vaccination among men who have sex with men: a systematic review of published research. *International Journal of STD & AIDS*. 2017;28(6):534-42.
56. Leumi S, Bigna JJ, Amougou MA, Ngouo A, Nyaga UF, Noubiap JJ. Global Burden of Hepatitis B Infection in People Living With Human Immunodeficiency Virus: A Systematic Review and Meta-analysis. *Clin Infect Dis*. 2020;71(11):2799-806.
57. Wu J, Ding C, Liu X, Zhou Y, Tian G, Lan L, et al. Worldwide burden of genital human papillomavirus infection in female sex workers: a systematic review and meta-analysis. *International journal of epidemiology*. 2021;50(2):527-37.
58. Abraha M, Egli-Gany D, Low N. Epidemiological, behavioural, and clinical factors associated with antimicrobial-resistant gonorrhoea: a review. *F1000Research*. 2018;7:400.
59. Falagas ME, Zarkadoulia E. Factors associated with suboptimal compliance to vaccinations in children in developed countries: a systematic review. 2008(1473-4877 (Electronic)).
60. Fern, ez de Casadevante V, Gil Cuesta J, Cantarero-Arevalo L. Determinants in the Uptake of the Human Papillomavirus Vaccine: A Systematic Review Based on European Studies. *Frontiers in Oncology*. 2015;5:141.
61. Fisher H, Trotter CL, Audrey S, MacDonald-Wallis K, Hickman M. Inequalities in the uptake of human papillomavirus vaccination: a systematic review and meta-analysis. *International Journal of Epidemiology*. 2013;42(3):896-908.
62. Gorjana R, Chapman J, Flight I, Wilson C. Factors associated with parents' attitudes to the HPV vaccination of their adolescent sons : A systematic review. *Preventive Medicine*. 2017;95(1):26-37.
63. Malerba V, Costantino C, Napoli G, Marchese V, Casuccio A, Tabacchi G, et al. Antimeningococcal and antipneumococcal vaccination determinants: a European systematic literature review. 2015(1120-9763 (Print)).
64. Millett GA, Peterson JI, Flores SA, Flores Sa Fau - Hart TA, Hart Ta Fau - Jeffries WL, Jeffries Wl 4th Fau - Wilson PA, Wilson Pa Fau - Rourke SB, et al. Comparisons of disparities and risks of HIV infection in black and other men who have sex with men in Canada, UK, and USA: a meta-analysis. 2012(1474-547X (Electronic)).
65. Nagata JM, Hern, ez-Ramos I, Kurup AS, Albrecht D, Vivas-Torrealba C, et al. Social determinants of health and seasonal influenza vaccination in adults  $\geq 65$  years: a systematic review of qualitative and quantitative data. *BMC Public Health*. 2013;13:388.
66. Offer C, Lee A, Humphreys C. Tuberculosis in South Asian communities in the UK: a systematic review of the literature. *Journal of Public Health*. 2015;38(2):250-7.
67. Tabacchi G, Costantino C, Napoli G, Marchese V, Cracchiolo M, Casuccio A, et al. Determinants of European parents' decision on the vaccination of their children against measles, mumps and rubella: A systematic review and meta-analysis. *Human vaccines & Immunotherapeutics*. 2016;12(7):1909-23.
68. Wayal S, Aicken CRH, Griffiths C, Blomquist PB, Hughes G, Mercer CH. Understanding the burden of bacterial sexually transmitted infections and *Trichomonas vaginalis* among black Caribbeans in the United Kingdom: Findings from a systematic review. *Plos One*. 2018;13(12):19.
69. Okoli GA-OX, Reddy VK, Al-Yousif Y, Neilson CJ, Mahmud SM, Abou-Setta AM. Sociodemographic and health-related determinants of seasonal influenza vaccination in pregnancy: A



- systematic review and meta-analysis of the evidence since 2000. *Acta obstetrica et gynecologica Scandinavica*. 2021;100(6):997-1009.
70. Chen Q, Zeng D, She Y, Lyu Y, Gong X, Feinstein MJ, et al. Different transmission routes and the risk of advanced HIV disease: A systematic review and network meta-analysis of observational studies. *EClinicalMedicine*. 2019;16:121-8.
71. Fakoya I, Alvarez-del Arco D, Woode-Owusu M, Monge S, Rivero-Montesdeoca Y, Delpech V, et al. A systematic review of post-migration acquisition of HIV among migrants from countries with generalised HIV epidemics living in Europe: implications for effectively managing HIV prevention programmes and policy. *BMC Public Health*. 2015;15:561.
72. Jin FY, Dore GJ, Matthews G, Luhmann N, Macdonald V, Bajis S, et al. Prevalence and incidence of hepatitis C virus infection in men who have sex with men: a systematic review and meta-analysis. *Lancet Gastroenterology & Hepatology*. 2020;6(1):39-56.
73. Oldenburg CE, Perez-Brumer AG, Reisner SL, Mattie J, Barnighausen T, Mayer KH, et al. Global burden of HIV among men who engage in transactional sex: a systematic review and meta-analysis. *PLoS ONE [Electronic Resource]*. 2014;9(7):e103549.
74. Colledge S, Leung J, Grebely J, Degenhardt L, Peacock A, Hickman M, et al. Socio-demographic and ecological factors associated with anti-HCV prevalence in people who inject drugs: A systematic review. *Drug & Alcohol Dependence*. 2020;209:107899.
75. Adams NL, Rose TC, Hawker J, Violato M, O'Brien SJ, Barr B, et al. Relationship between socioeconomic status and gastrointestinal infections in developed countries: A systematic review and meta-analysis. *PLoS ONE [Electronic Resource]*. 2018;13(1):e0191633.
76. Behera MR, Intarak R. HIV risk among labor migrants: An in-depth study of the literature. *Indian Journal of Public Health Research and Development*. 2020;9(12):107-15.
77. Bonten M, Johnson JR, van den Biggelaar AHJ, Georgalis L, Geurtsen J, de Palacios PI, et al. Epidemiology of *Escherichia coli* Bacteremia: A Systematic Literature Review. 2021(1537-6591 (Electronic)).
78. Crichton J, Hickman M, Campbell R, Batista-Ferrer H, Macleod J. Socioeconomic factors and other sources of variation in the prevalence of genital chlamydia infections: A systematic review and meta-analysis. *BMC Public Health*. 2015;15:729.
79. Denning DW, Kneale M, Sobel JD, Rautemaa-Richardson R. Global burden of recurrent vulvovaginal candidiasis: a systematic review. *The Lancet Infectious Diseases*. 2018;18(11):e339-e47.
80. Ghiasv, H, Higgs P, Noroozi M, Ghaedamini Harouni G, Hemmat M, et al. Social and demographical determinants of quality of life in people who live with HIV/AIDS infection: evidence from a meta-analysis. *Biodemography & Social Biology*. 2019;65(1):57-72.
81. Hermann JS, Featherstone RM, Russell ML, MacDonald SE. Immunization Coverage of Children in Care of the Child Welfare System in High-Income Countries: A Systematic Review. *American Journal of Preventive Medicine*. 2019;56(2):e55-e63.
82. Li P, Liu J, Li Y, Su J, Ma Z, Bramer WM, et al. The global epidemiology of hepatitis E virus infection: A systematic review and meta-analysis. *Liver International*. 2020;40(7):1516-28.
83. Lindsay L, Wolter J, De Coster I, Van Damme P, Verstraeten T. A decade of norovirus disease risk among older adults in upper-middle and high income countries: a systematic review. *BMC Infectious Diseases*. 2015;15:425.
84. Possenti A, Manzano-Román R, Sánchez-Ovejero C, Boufana B, La Torre G, Siles-Lucas M, et al. Potential Risk Factors Associated with Human Cystic Echinococcosis: Systematic Review and Meta-analysis. 2016(1935-2735 (Electronic)).
85. Richterman A, Sainvilien DR, Eberly L, Ivers LC. Individual and Household Risk Factors for Symptomatic Cholera Infection: A Systematic Review and Meta-analysis. 2018(1537-6613 (Electronic)).

- 1  
2  
3 86. Rostami A, Riahi SM, Contopoulos-Ioannidis DG, Gamble HR, Fakhri Y, Shiadeh MN, et al. Acute Toxoplasma infection in pregnant women worldwide: A systematic review and meta-analysis. *Plos Neglected Tropical Diseases*. 2019;13(10):20.
- 4  
5  
6 87. Rostami A, Riahi SM, Holl CV, Taghipour A, Khalili-Fomeshi M, et al. Seroprevalence estimates for toxocariasis in people worldwide: A systematic review and meta-analysis. *PLoS Neglected Tropical Diseases* [electronic resource]. 2019;13(12):e0007809.
- 7  
8  
9 88. Schepisi MS, Motta I, Dore S, Costa C, Sotgiu G, Girardi E. Tuberculosis transmission among children and adolescents in schools and other congregate settings: a systematic review. *New Microbiologica*. 2019;41(4):282-90.
- 10  
11  
12 89. Schierhout G, McGregor S, Gessain A, Einsiedel L, Martinello M, Kaldor J. Association between HTLV-1 infection and adverse health outcomes: a systematic review and meta-analysis of epidemiological studies. *Lancet Infectious Diseases*. 2020;20(1):133-43.
- 13  
14  
15 90. Spyromitrou-Xioufi P, Tsirigotaki M, Ladomenou F. Risk factors for meningococcal disease in children and adolescents: a systematic review and META-analysis. *European Journal of Pediatrics*. 2020;179(7):1017-27.
- 16  
17  
18 91. Strifler L, Morris SK, Dang V, Tu HT, Minhas R, Jamieson FB, et al. The health burden of invasive meningococcal disease: A systematic review. *Paediatrics and Child Health (Canada)*. 2016;19:e92.
- 19  
20  
21 92. Zamani M, Ebrahimitabar F, Zamani V, Miller WH, Alizadeh-Navaei R, Shokri-Shirvani J, et al. Systematic review with meta-analysis: the worldwide prevalence of Helicobacter pylori infection. *Alimentary Pharmacology and Therapeutics*. 2018;47(7):868-76.
- 22  
23  
24 93. Badri MA-OX, Eslahi AV, Olfatifar M, Dalvand S, Houshmand E, Abdoli A, et al. Keys to Unlock the Enigma of Ocular Toxocariasis: A Systematic Review and Meta-analysis. *Ocular immunology and inflammation*. 2021; Advance online publication.:1-12.
- 25  
26  
27 94. Dong S, Yang Y, Wang Y, Yang D, Yang Y, Shi Y, et al. Prevalence of Cryptosporidium Infection in the Global Population: A Systematic Review and Meta-analysis. *Acta Parasitol* 2020;65(4):882-9.
- 28  
29  
30 95. Dugan E, Blach S, Biondi M, Cai Z, DePaola M, Estes C, et al. Global prevalence of hepatitis C virus in women of childbearing age in 2019: a modelling study. *The Lancet Gastroenterology & Hepatology*. 2021;6(3):169-84.
- 31  
32  
33 96. Faria APV, da Silva TPR, Duarte CK, Mendes LL, Santos FBO, Matozinhos FP. Tetanus vaccination in pregnant women: a systematic review and meta-analysis of the global literature. *Public health*. 2021;196:43-51.
- 34  
35  
36 97. Lafond KA-O, Porter RA-O, Whaley MA-O, Suizan ZA-O, Ran ZA-O, Aleem MA-O, et al. Global burden of influenza-associated lower respiratory tract infections and hospitalizations among adults: A systematic review and meta-analysis. *PLoS Med*. 2021;18(3):e1003550.
- 37  
38  
39 98. Macina D, Evans KE. Bordetella pertussis in School-Age Children, Adolescents and Adults: A Systematic Review of Epidemiology and Mortality in Europe. *Infect Dis Ther*. 2021;10(4):2021-118.
- 40  
41  
42 99. Mirzadeh M, Olfatifar M, Eslahi AV, Abdoli A, Houshmand E, Majidiani H, et al. Global prevalence of Trichomonas vaginalis among female sex workers: a systematic review and meta-analysis. *Parasitol Res* 2021;120(7):2311-22.
- 43  
44  
45 100. Roller-Wirnsberger RA-O, Lindner S, Kolosovski L, Platzer E, Dovjak P, Flick H, et al. The role of health determinants in the influenza vaccination uptake among older adults (65+): a scope review. *Aging clinical and experimental research*. 2021;33(8):2123-32.
- 46  
47  
48 101. Rostami AA-O, Riahi SA-O, Abdollahzadeh Sagha S, Taghipour A, Sepidarkish M, Mohammadnia-Afrouzi MA-O, et al. Seroprevalence Estimates of Latent and Acute Toxoplasma Infections in HIV(+) People-Call for Action in Underprivileged Communities. *LID - 10.3390/microorganisms9102034* [doi] LID - 2034. *Communities Microorganisms*. 2021;9(10):2034.
- 49  
50  
51  
52  
53  
54  
55  
56  
57  
58  
59  
60

102. Song WM, Li YF, Liu YX, Liu Y, Yu CB, Liu JY, et al. Drug-Resistant Tuberculosis Among Children: A Systematic Review and Meta-Analysis. *Frontiers in public health*. 2021;9:721817.
103. Sultana ZZ, Hoque FU, Beyene J, Akhlak-UI-Islam M, Khan MHR, Ahmed S, et al. HIV infection and multidrug resistant tuberculosis: a systematic review and meta-analysis. *BMC Infectious Diseases*. 2021;21(1):51.
104. Eilami O, Nazari A, Dousti M, Sayehmiri F, Ghasemi M. Investigation of HIV/AIDS prevalence and associated risk factors among female sex workers from 2010 to 2017: a meta-analysis study. *HIV/AIDS Research and Palliative Care*. 2019;11:105-17.
105. Fauroux B, Simoes EAF, Checchia PA, Paes B, Figueras-Aloy J, Manzoni P, et al. The Burden and Long-term Respiratory Morbidity Associated with Respiratory Syncytial Virus Infection in Early Childhood. *Infectious Diseases and Therapy*. 2017;6(2):173-97.
106. Leung J, Peacock A, Colledge S, Grebely J, Cunningham EB, Hickman M, et al. A Global Meta-analysis of the Prevalence of HIV, Hepatitis C Virus, and Hepatitis B Virus Among People Who Inject Drugs-Do Gender-Based Differences Vary by Country-Level Indicators? *Journal of Infectious Diseases*. 2019;220(1):78-90.
107. Pulver A, Ramraj C, Ray JG, O'Campo P, Urquia ML. A scoping review of female disadvantage in health care use among very young children of immigrant families. *Social Science & Medicine*. 2016;152:50-60.
108. Van Gerwen O, Muzny C, Austin E, Musgrove K, Jani A. Prevalence of STIs and HIV in transgender women and men: A systematic review. *Sexually Transmitted Infections*. 2020;95:A335.
109. Whelan J, Abbing-Karahagopian V, Serino L, Unemo M. Gonorrhoea: a systematic review of prevalence reporting globally. *BMC Infectious Diseases*. 2021;21(1):1152.
110. Nourollahpour Shiadeh M, Esfandyari S, Ashrafmansouri M, Mirzapour A, Taghipour A, Spotin A, et al. The prevalence of latent and acute toxoplasmosis in HIV-infected pregnant women: A systematic review and meta-analysis. *Microb Pathog* 2020;149(1096-1208 (Electronic)):104549. .
111. Newman KL, Leon JS, Rebolledo PA, Scallan E. The impact of socioeconomic status on foodborne illness in high-income countries: a systematic review. *Epidemiology & Infection*. 2015;143(12):2473-85.
112. Rodrigo C, Rajapakse S. HIV, poverty and women. *International Health*. 2010;2(1):9-16.
113. Coffey PM, Ralph AP, Krause VL. The role of social determinants of health in the risk and prevention of group A streptococcal infection, acute rheumatic fever and rheumatic heart disease: A systematic review. *Plos Neglected Tropical Diseases*. 2018;12(6):22.
114. Ding Y, Sun X, Xu Y, Yang L, Zhang Y, Shen Q. Association Between Income and Hepatitis B Seroprevalence: A Systematic Review and Meta-analysis. *Hepat Mon*. 2020;20(10):e104675.
115. Larson HJ, Jarrett C, Eckersberger E, Smith DMD, Paterson P. Understanding vaccine hesitancy around vaccines and vaccination from a global perspective: A systematic review of published literature, 2007-2012. *Vaccine*. 2014;32(19):2150-9.
116. Arat A, Burstrom B, Ostberg V, Hjern A. Social inequities in vaccination coverage among infants and pre-school children in Europe and Australia - a systematic review. *BMC Public Health*. 2019;19(1):290.
117. Forshaw J, Gerver SM, Gill M, Cooper E, Manikam L, Ward H. The global effect of maternal education on complete childhood vaccination: a systematic review and meta-analysis. *BMC Infectious Diseases*. 2017;17(1):801.
118. Bocquier A, Ward J, Raude J, Peretti-Watel P, Verger P. Socioeconomic differences in childhood vaccination in developed countries: a systematic review of quantitative studies. *Expert Review of Vaccines*. 2017;16(11):1107-18.
119. Lucyk K, Simmonds KA, Lorenzetti DL, Drews SJ, Svenson LW, Russell ML. The association between influenza vaccination and socioeconomic status in high income countries varies by the measure used: a systematic review. *BMC Medical Research Methodology*. 2019;19(1):153.

- 1  
2  
3 120. Di Gennaro F, Pizzol D, Cebola B, Stubbs B, Monno L, Saracino A, et al. Social  
4 determinants of therapy failure and multi drug resistance among people with tuberculosis: A review.  
5 2017(1873-281X (Electronic)).  
6  
7 121. Najafizada M, Rahman A, Taufique Q, Sarkar A. Social determinants of multidrug-resistant  
8 tuberculosis: A scoping review and research gaps. *Indian J Tuberc* 2021;68(1):99-105.  
9  
10 122. Salgado-Barreira A, Estany-Gestal A, Figueiras A. [Effect of socioeconomic status on  
11 mortality in urban areas: a systematic critical review]. *Cadernos de Saude Publica*. 2014;30(8):1609-  
12 21.  
13  
14 123. Vukovic V, Lillini R, Lupi S, Fortunato F, Cicconi M, Matteo G, et al. Identifying people at  
15 risk for influenza with low vaccine uptake based on deprivation status: a systematic review.  
16 *European Journal of Public Health*. 2020;30(1):132-41.  
17  
18  
19  
20  
21  
22  
23  
24  
25  
26  
27  
28  
29  
30  
31  
32  
33  
34  
35  
36  
37  
38  
39  
40  
41  
42  
43  
44  
45  
46  
47  
48  
49  
50  
51  
52  
53  
54  
55  
56  
57  
58  
59  
60

For peer review only

Figure 1: PRISMA flow diagram for study selection

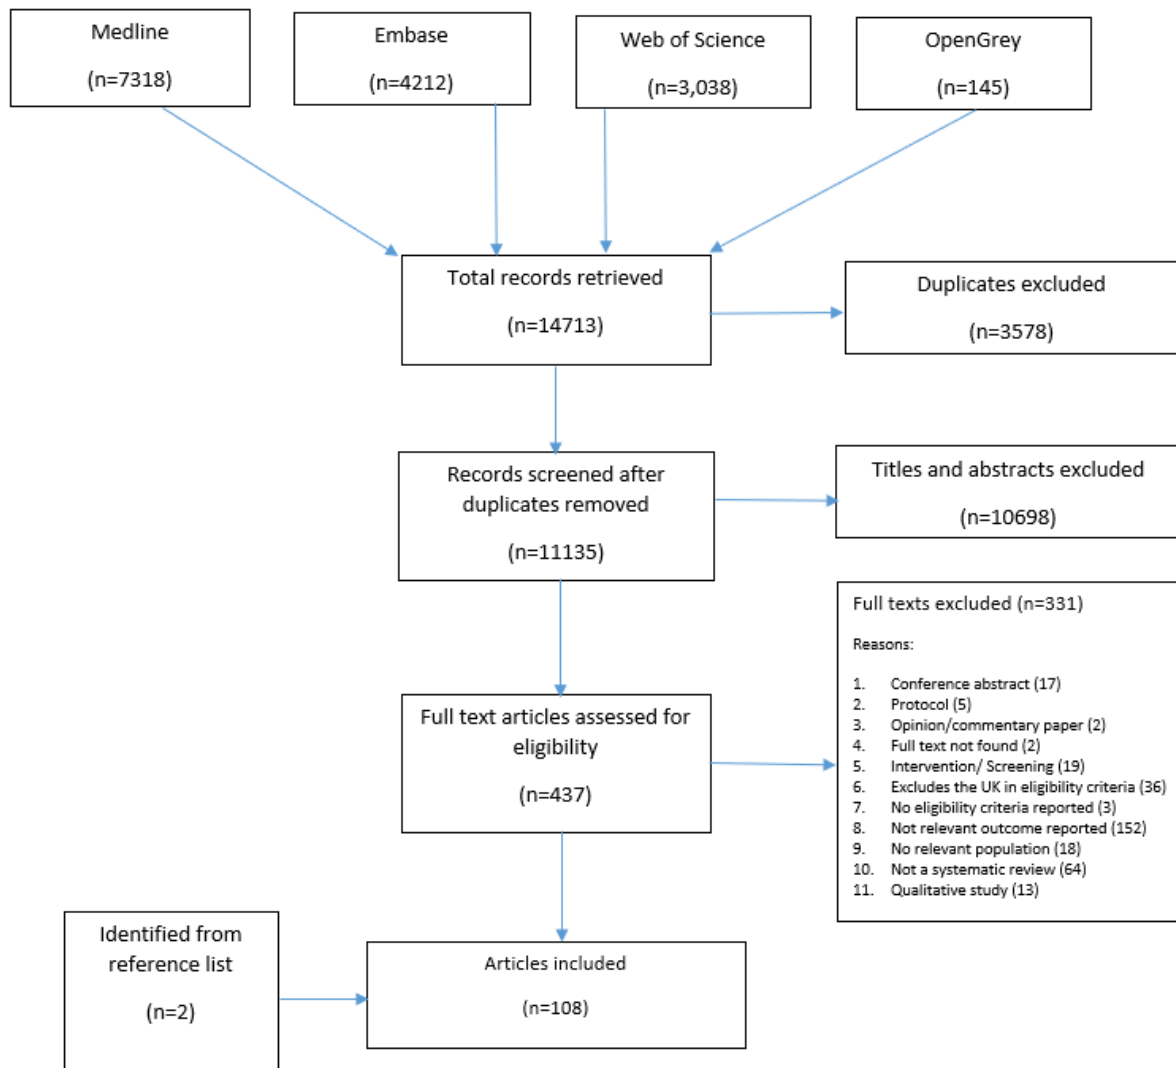

only

| Dimension of inequalities  | Variables                                                                                        | Tuberculosis | HIV | STI | Hepatitis C | Vaccination | AMR/multi-drug resistance | Others |
|----------------------------|--------------------------------------------------------------------------------------------------|--------------|-----|-----|-------------|-------------|---------------------------|--------|
| Protected characteristics  | Age                                                                                              | 2            | 3   | 4   | 3           | 13          | 4                         | 19     |
|                            | Sex                                                                                              | 2            | 7   | 4   | 3           | 5           | 2                         | 11     |
|                            | Marriage and civil partnership                                                                   | 0            | 0   | 0   | 0           | 6           | 0                         | 0      |
|                            | Pregnancy and maternity                                                                          | 0            | 0   | 0   | 2           | 0           | 0                         | 3      |
|                            | Race (or ethnicity)                                                                              | 3            | 2   | 1   | 0           | 11          | 1                         | 1      |
|                            | Religion or belief                                                                               | 0            | 0   | 0   | 0           | 5           | 0                         | 1      |
|                            | Sexual orientation                                                                               | 0            | 4   | 0   | 2           | 0           | 1                         | 4      |
|                            | Gender reassignment                                                                              | 0            | 1   | 0   | 0           | 0           | 0                         | 1      |
|                            | Disability                                                                                       | 0            | 0   | 0   | 0           | 0           | 0                         | 1      |
| Inclusion Health Groups    | Vulnerable migrants                                                                              | 0            | 1   | 1   | 2           | 2           | 1                         | 3      |
|                            | General migrants                                                                                 | 5            | 8   | 4   | 5           | 5           | 2                         | 6      |
|                            | People experiencing homelessness and rough sleeping                                              | 3            | 2   | 0   | 2           | 0           | 1                         | 3      |
|                            | People who engage in sex work                                                                    | 0            | 4   | 2   | 0           | 1           | 0                         | 2      |
|                            | Gypsy Roma/ Traveller communities/Indigenous people                                              | 2            | 0   | 0   | 0           | 1           | 0                         | 0      |
|                            |                                                                                                  |              |     |     |             |             |                           |        |
| Socioeconomic inequalities | Level of education/income                                                                        | 1            | 4   | 1   | 0           | 18          | 3                         | 9      |
|                            | Employment/occupation                                                                            | 1            | 2   | 2   | 1           | 10          | 0                         | 5      |
|                            | Social class/Area level socioeconomic status                                                     | 0            | 1   | 0   | 0           | 11          | 0                         | 1      |
|                            | Deprivation                                                                                      | 1            | 0   | 1   | 0           | 4           | 0                         | 2      |
|                            | Residence/living situation (e.g living in a home environment with moisture damage, house tenure) | 2            | 0   | 0   | 0           | 7           | 2                         | 10     |

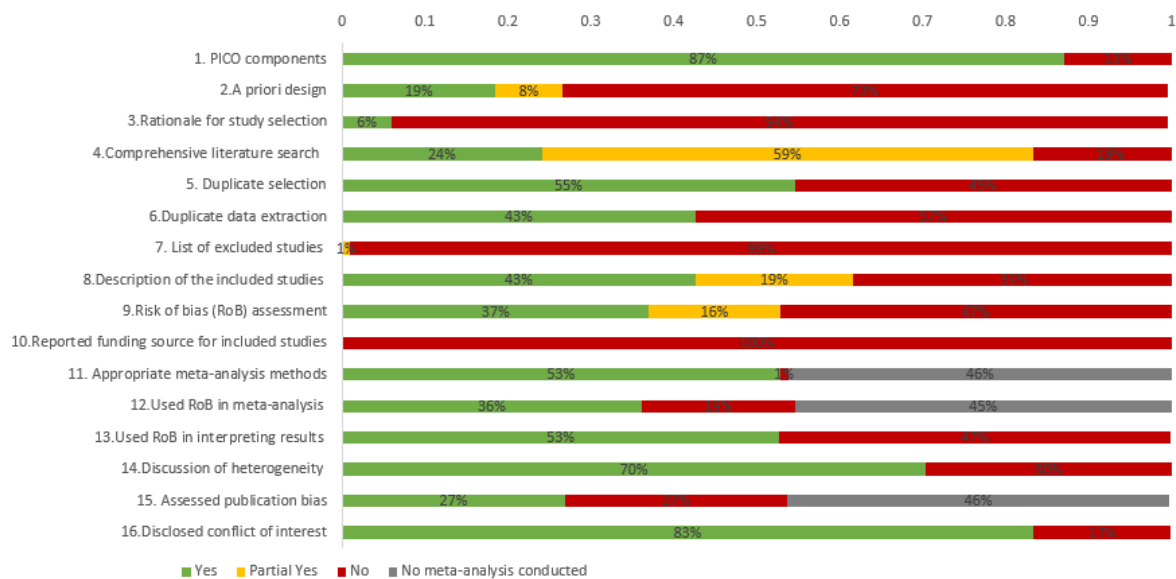

peer review only

**Online supplemental file 1: SEARCH STRATEGY****Searched Ovid MEDLINE(R) ALL 1946 to November 23, 2021 on 24/11/2021**

Search terms for systematic reviews found at

<http://extranet.santecom.gc.ca/wiki/!biblio3s/doku.php?id=concepts:revues-de-la-litterature-et-meta-analyses>

|    | Search                                           | Result |
|----|--------------------------------------------------|--------|
| 1  | inequality.mp. or Socioeconomic Factors/         | 183584 |
| 2  | inequalities.mp.24364                            |        |
| 3  | protected characteristics.mp. 10                 |        |
| 4  | inclusion health groups.mp. 3                    |        |
| 5  | Homeless Persons/ or homeless.mp. 12922          |        |
| 6  | migrant\$.mp. or "Transients and Migrants"/      | 26370  |
| 7  | Sex Work/ or Sex Workers/ or sex work*.mp. 10781 |        |
| 8  | Gypsy roma.mp. 18                                |        |
| 9  | Human immunodeficiency virus/                    | 21059  |
| 10 | acquired immune deficiency syndrome/             | 77137  |
| 11 | infection/                                       | 40269  |
| 12 | tuberculosis/                                    | 108757 |
| 13 | parasitosis/                                     | 0      |
| 14 | hepatitis/                                       | 22837  |
| 15 | Vaccination/                                     | 90391  |
| 16 | Immunization/                                    | 52361  |
| 17 | Communicable Disease/                            | 31146  |
| 18 | infectious disease.ti,ab,kw. 39865               |        |
| 19 | infection.ti,ab,kw. 1211775                      |        |
| 20 | tuberculosis.ti,ab,kw. 203159                    |        |
| 21 | hiv.ti,ab,kw. 331192                             |        |
| 22 | aids.ti,ab,kw. 156336                            |        |
| 23 | hepatitis.ti,ab,kw. 228655                       |        |
| 24 | "immuni*".ti,ab,kw. 342218                       |        |
| 25 | "vaccin*".ti,ab,kw. 354100                       |        |
| 26 | Communicable disease.ti,ab,kw.4291               |        |



1  
2  
3 27 Parasitic disease.ti,ab,kw. 3780  
4  
5 28 infectious disease\$.mp. or Communicable Diseases/ 145081  
6  
7 29 (((systematic or state-of-the-art or scoping or literature or umbrella) adj (review\* or  
8 overview\* or assessment\*)) or "review\* of reviews" or meta-analy\* or metaanaly\* or ((systematic or  
9 evidence) adj1 assess\*) or "research evidence" or metasynthe\* or meta-synthe\*).tw. or exp Review  
10 Literature as Topic/ or exp Review/ or Meta-Analysis as Topic/ or Meta-Analysis/ or "systematic  
11 review"/ 3165549  
12  
13 30 1 or 2 or 3 or 4 or 5 or 6 or 7 or 8 240954  
14  
15 31 9 or 10 or 11 or 12 or 13 or 14 or 15 or 16 or 17 or 18 or 19 or 20 or 21 or 22 or 23 or 24 or  
16 25 or 26 or 27 or 28 2364192  
17  
18 32 30 and 31 32588  
19  
20 33 29 and 32 2822  
21  
22 34 social class.mp. or social class/ 48149  
23  
24 35 poverty.mp. or poverty/ 65773  
25  
26 36 income.mp. or income/ 162454  
27  
28 37 educational status.mp. or educational status/ 58473  
29  
30 38 economic status.mp. or economic status/ 15731  
31  
32 39 travellers.mp. 4716  
33  
34 40 rough sleeping.mp. 23  
35  
36 41 homelessness/ 8802  
37  
38 42 30 or 34 or 35 or 36 or 37 or 38 or 39 or 40 or 41 476015  
39  
40 43 sexually transmitted disease/ or STI.mp. 32214  
41  
42 44 AMR.mp. 5408  
43  
44 45 antimicrobial resistance.mp. or antibiotic resistance/ 85277  
45  
46 46 anti-microbial resistance.mp. 196  
47  
48 47 31 or 43 or 44 or 45 or 46 2444675  
49  
50 48 42 and 47 62612  
51  
52 49 29 and 48 8144  
53  
54 50 limit 49 to yr="2000 -Current" 7318  
55  
56  
57  
58  
59  
60

**Embase Classic+Embase 1947 to 2021 November 23 searched on 24/11/2021**

| Searches                                           | Results |
|----------------------------------------------------|---------|
| 1 inequality.mp. or Socioeconomic Factors/         | 159438  |
| 2 inequalities.mp.26580                            |         |
| 3 protected characteristics.mp. 18                 |         |
| 4 inclusion health groups.mp. 3                    |         |
| 5 Homeless Persons/ or homeless.mp. 12270          |         |
| 6 migrant\$.mp. or "Transients and Migrants"/      | 59556   |
| 7 Sex Work/ or Sex Workers/ or sex work*.mp. 14114 |         |
| 8 Gypsy roma.mp. 22                                |         |
| 9 Human immunodeficiency virus/                    | 125500  |
| 10 acquired immune deficiency syndrome/            | 136979  |
| 11 infection/                                      | 402825  |
| 12 tuberculosis/                                   | 162052  |
| 13 parasitosis/                                    | 24410   |
| 14 hepatitis/                                      | 67370   |
| 15 Vaccination/                                    | 179733  |
| 16 Immunization/                                   | 117275  |
| 17 Communicable Disease/                           | 34287   |
| 18 infectious disease.ti,ab,kw.                    | 50469   |
| 19 infection.ti,ab,kw.                             | 1631799 |
| 20 tuberculosis.ti,ab,kw.                          | 245043  |
| 21 hiv.ti,ab,kw.                                   | 426227  |
| 22 aids.ti,ab,kw.                                  | 190986  |
| 23 hepatitis.ti,ab,kw.                             | 334114  |
| 24 "immuni*" .ti,ab,kw.                            | 440252  |
| 25 "vaccin*" .ti,ab,kw.                            | 438145  |
| 26 Communicable disease.ti,ab,kw.                  | 5111    |
| 27 Parasitic disease.ti,ab,kw.                     | 4822    |

1  
2  
3 28 infectious disease\$.mp. or Communicable Diseases/ 150812  
4  
5 29 1 or 2 or 3 or 4 or 5 or 6 or 7 or 8 254578  
6  
7 30 9 or 10 or 11 or 12 or 13 or 14 or 15 or 16 or 17 or 18 or 19 or 20 or 21 or 22 or 23 or 24 or  
8 25 or 26 or 27 or 28 3242281  
9  
10 31 29 and 30 37750  
11  
12 32 (((systematic or state-of-the-art or scoping or literature or umbrella) adj (review\* or  
13 overview\* or assessment\*)) or "review\* of reviews" or meta-analy\* or metaanaly\* or ((systematic or  
14 evidence) adj1 assess\*) or "research evidence" or metasynthe\* or meta-synthe\*).tw. or systematic  
15 review/ or "systematic review (topic)"/ or meta analysis/ or "meta analysis (topic)"/ 713296  
16  
17 33 31 and 32 1343  
18  
19 34 social class.mp. or social class/ 40328  
20  
21 35 poverty.mp. or poverty/ 64722  
22  
23 36 income.mp. or income/ 221004  
24  
25 37 educational status.mp. or educational status/ 90042  
26  
27 38 economic status.mp. or economic status/ 23383  
28  
29 39 travellers.mp. 6111  
30  
31 40 rough sleeping.mp. 30  
32  
33 41 homelessness/ 12187  
34  
35 42 29 or 34 or 35 or 36 or 37 or 38 or 39 or 40 or 41 588825  
36  
37 43 sexually transmitted disease/ or STI.mp. 62753  
38  
39 44 AMR.mp. 9242  
40  
41 45 antimicrobial resistance.mp. or antibiotic resistance/ 188533  
42  
43 46 anti-microbial resistance.mp. 289  
44  
45 47 30 or 43 or 44 or 45 or 46 3400990  
46  
47 48 32 and 42 and 47 4243  
48  
49 49 limit 48 to yr="2000 -Current" 4212  
50  
51  
52  
53  
54  
55  
56  
57  
58  
59  
60

1  
2  
3  
4  
5 **Searched Web of Science on 24/11/2021 (Web of Science Core Collection)**  
6  
7  
8

9 *Inequalities related terms searched in topics and combined with title search for infectious diseases.*  
10 *This makes the search capture inequality related articles where inequalities are not necessarily*  
11 *mentioned in the title. Had to limit the infectious diseases to titles in order to focus on relevant*  
12 *papers.*  
13

|    |                                                                                                                                                                                                                                                                                                                                                                                                                                         |        |
|----|-----------------------------------------------------------------------------------------------------------------------------------------------------------------------------------------------------------------------------------------------------------------------------------------------------------------------------------------------------------------------------------------------------------------------------------------|--------|
| #1 | (inequalities OR inequality OR "Socioeconomic Factor" OR "protected characteristics" OR inclusion health groups OR "Homeless Person*" OR homelessness OR Transients OR Migrant* OR "Sex Work*" OR "Gypsy roma" OR "rough sleeping" OR traveller* OR "traveller community" OR "traveller communities" OR "economic status" OR "educational status" OR income OR poverty OR "social class") (Topic) and Review (Document Type)            | 53,359 |
| #2 | ("Human immunodeficiency virus" OR HIV OR "acquired immune deficiency syndrome" OR AIDS OR infection OR tuberculosis OR parasitosis OR hepatitis OR vaccination OR immunization OR "communicable disease*" OR "infectious disease*" OR "parasitic disease*" OR "sexually transmitted diseas*" OR STI OR AMR OR "antimicrobial resistance" OR "anti-microbial resistance" OR "antibiotic resistance") (Title) and Review (Document Type) | 64,026 |
| #3 | #1 AND #2<br>Timespan: 2000-01-01 to 2021-11-24 (Publication Date)                                                                                                                                                                                                                                                                                                                                                                      | 3,038  |

31  
32  
33  
34  
35  
36  
37 **Searched Opengrey on 24112021**  
38  
39  
40

41 (inequalities OR inequality OR "Socioeconomic Factor" OR "protected characteristics" OR inclusion  
42 health groups OR "Homeless Person\*" OR homelessness OR Transients OR Migrant\* OR "Sex Work\*"  
43 OR "Gypsy roma" OR "rough sleeping" OR traveller\* OR "traveller community" OR "traveller  
44 communities" OR "economic status" OR "educational status" OR income OR poverty OR "social  
45 class") AND ("Human immunodeficiency virus" OR HIV OR "acquired immune deficiency syndrome"  
46 OR AIDS OR infection OR tuberculosis OR parasitosis OR hepatitis OR vaccination OR immunization  
47 OR "communicable disease\*" OR "infectious disease\*" OR "parasitic disease\*" OR "sexually  
48 transmitted diseas\*" OR STI OR AMR OR "antimicrobial resistance" OR "anti-microbial resistance" OR  
49 "antibiotic resistance")  
50  
51

52  
53 **145** articles retrieved with the search  
54  
55  
56  
57  
58  
59  
60

## Online supplementary file 2: Characteristics of Included Reviews

| Study ID<br>(Author, Year)      | Corresponding<br>Author's Country | Infectious diseases                                       | Search period    | Includes<br>meta-<br>analysis<br>(Yes/No) | Number of studies<br>included ( <i>Number of<br/>UK studies</i> ) | Publication<br>year range for<br>included<br>studies | Protected<br>characteristics | Socioeconomic<br>inequalities | Inclusion<br>health<br>groups |
|---------------------------------|-----------------------------------|-----------------------------------------------------------|------------------|-------------------------------------------|-------------------------------------------------------------------|------------------------------------------------------|------------------------------|-------------------------------|-------------------------------|
| Abraha, 2018 <sup>58</sup>      | Switzerland                       | AMR-Gonorrhoea                                            | 1946-2017        | No                                        | 24 (unclear)                                                      | 1989-2017                                            | ✓                            | ✓                             |                               |
| Adams, 2018 <sup>75</sup>       | UK                                | Gastrointestinal Infection                                | 1980 - 2015      | Yes                                       | 77 (unclear)                                                      | 1995-2015                                            | ✓                            | ✓                             |                               |
| Aldridge, 2018 <sup>46</sup>    | UK                                | Not specified                                             | 2005- 2015       | Yes                                       | 337 (unclear)                                                     | not reported                                         | ✓                            |                               | ✓                             |
| Alividza, 2018 <sup>47</sup>    | UK                                | AMR                                                       | no date limit    | No                                        | 19 (at least 2)                                                   | 1998 to 2015                                         |                              | ✓                             |                               |
| Arat, 2019 <sup>116</sup>       | Sweden                            | Vaccination                                               | not reported     | No                                        | 15 (2)                                                            | 2007-2017                                            |                              | ✓                             |                               |
| Arum, 2021 <sup>50</sup>        | UK                                | HIV, HCV                                                  | 2000 - 2017      | Yes                                       | 37 (6)                                                            | 2000 – 2019                                          |                              |                               | ✓                             |
| Badri, 2021 <sup>93</sup>       | Iran                              | Ocular toxocariasis                                       | 1966 - 2019      | Yes                                       | 101 (4)                                                           | 1966 - 2020                                          | ✓                            |                               |                               |
| Behera, 2018 <sup>76</sup>      | India                             | HIV                                                       | Not reported     | No                                        | Not reported                                                      | 1989 - 2017                                          | ✓                            |                               |                               |
| Beijer, 2012 <sup>48</sup>      | UK                                | TB, HCV virus, and HIV                                    | 1980 - 2012      | Yes                                       | 43 (4)                                                            | 1984 - 2011                                          | ✓                            | ✓                             | ✓                             |
| Bocquier 2017 <sup>118</sup>    | France                            | Vaccination                                               | 2000 - 2016      | No                                        | 43 (5)                                                            | Not reported                                         |                              | ✓                             |                               |
| Bonten, 2020 <sup>77</sup>      | Netherlands                       | <i>Escherichia coli</i> bacteraemia                       | 2007- 2018       | Yes                                       | 210 (21)                                                          | 2007-2018                                            | ✓                            |                               |                               |
| Chan, 2017 <sup>18</sup>        | Australia                         | TB                                                        | Inception- 2017  | Yes                                       | 20 (1)                                                            | 1990-2015                                            |                              |                               | ✓                             |
| Chen, 2019 <sup>70</sup>        | China                             | HIV disease                                               | unclear - 2019   | Yes                                       | 101 (1)                                                           | 1984-2017                                            | ✓                            |                               |                               |
| Chernet, 2017 <sup>14</sup>     | Switzerland                       | Six selected infectious diseases                          | not reported     | Yes                                       | 96 (unclear)                                                      | 2000-2017                                            |                              |                               | ✓                             |
| Coffey, 2018 <sup>113</sup>     | Australia                         | Group A Streptococcal infection,<br>acute rheumatic fever | Unclear - 2016   | No                                        | 91 (unclear)                                                      | 1944 - 2016                                          |                              | ✓                             |                               |
| Colledge, 2020 <sup>74</sup>    | Australia                         | HCV                                                       | not reported     | No                                        | 223 (16)                                                          | 2008 -2017                                           | ✓                            | ✓                             |                               |
| Cormier, 2019 <sup>44</sup>     | Canada                            | TB/HIV                                                    | 1980 - 2017.     | No                                        | 475 (0)                                                           | 1984-2017                                            | ✓                            | ✓                             | ✓                             |
| Crichton, 2015 <sup>78</sup>    | UK                                | Genital chlamydia infection                               | Inception - 2014 | Yes                                       | 36 (3)                                                            | not reported                                         | ✓                            | ✓                             |                               |
| De Vito, 2017 <sup>19</sup>     | Denmark                           | Vaccination                                               | 2007- 2017       | No                                        | 35 +21 (4)                                                        | not reported                                         |                              | ✓                             | ✓                             |
| Denning, 2018 <sup>79</sup>     | UK                                | Vulvovaginal candidiasis                                  | 1985 - 2016      | Yes                                       | 8 (2)                                                             | 2000-2013                                            | ✓                            |                               |                               |
| Di Gennaro, 2017 <sup>120</sup> | Mozambique                        | TB - MDR                                                  | Inception - 2016 | Yes                                       | 50 (1)                                                            | 1997 - 2016                                          |                              | ✓                             |                               |
| Ding, 2020 <sup>114</sup>       | China                             | HBV                                                       | Inception - 2020 | Yes                                       | 10 (0)                                                            | 1995 - 2019                                          |                              | ✓                             |                               |
| Dong, 2020 <sup>94</sup>        | China                             | Cryptosporidium Infection                                 | 1960 - 2018      | Yes                                       | 221 (unclear)                                                     | Unclear                                              | ✓                            | ✓                             |                               |
| Dugan, 2021 <sup>95</sup>       | USA                               | HCV                                                       | 2000 - 2018      | No                                        | 41 (unclear)                                                      | Unclear                                              | ✓                            |                               |                               |
| Eilami, 2019 <sup>104</sup>     | Iran                              | HIV/AIDS                                                  | 2010 - 2017      | Yes                                       | 54 (unclear)                                                      | 2010-2017                                            | ✓                            |                               |                               |
| Fakoya, 2015 <sup>71</sup>      | UK                                | HIV                                                       | 2002- 2014       | No                                        | 27 (9)                                                            | 2003-2014                                            | ✓                            |                               |                               |
| Falagas, 2008 <sup>59</sup>     | Greece                            | Vaccination                                               | Not reported     | No                                        | 39 (1)                                                            | 1979-2005                                            | ✓                            | ✓                             |                               |
| Falla, 2018 <sup>20</sup>       | Netherlands                       | Chronic HCV                                               | 2000-2015        | No                                        | Part 1: 18 (unclear)<br>Part 2: 56 (1)                            |                                                      |                              |                               | ✓                             |
| Faria, 2021 <sup>96</sup>       | Brazil                            | Vaccination                                               | Inception-2020   | Yes                                       | 31 (0)                                                            | 2001 -2020                                           | ✓                            | ✓                             |                               |
| Fauroux, 2017 <sup>105</sup>    | Spain                             | Respiratory Syncytial Virus                               | 1995 - 2015      | No                                        | 74 (8)                                                            | Unclear                                              | ✓                            | ✓                             |                               |
| Faustini, 2005 <sup>21</sup>    | Italy                             | TB (MDR)                                                  | 1993-2003        | Yes                                       | 29 (3)                                                            | 1995-2005                                            | ✓                            |                               | ✓                             |
| Fernández, 2015 <sup>60</sup>   | Denmark                           | Vaccination: HPV                                          | not reported     | No                                        | 23(8)                                                             | 2008-2014                                            | ✓                            | ✓                             |                               |
| Fisher, 2013 <sup>61</sup>      | UK                                | Vaccination: HPV                                          | Inception- 2012  | Yes                                       | 27(1)                                                             | 2008-2012                                            | ✓                            | ✓                             |                               |
| Forshaw, 2017 <sup>117</sup>    | UK                                | Vaccination                                               | 1990 - 2016      | Yes                                       | 37(0)                                                             | 1990- 2015                                           | ✓                            | ✓                             |                               |
| Fournet, 2018 <sup>8</sup>      | Netherlands                       | Vaccination                                               | 1950- 2013       | No                                        | 48/15 (at least 1)                                                | not reported                                         | ✓                            |                               | ✓                             |
| Ghiasvand, 2020 <sup>80</sup>   | Iran                              | HIV/AIDS                                                  | Inception - 2017 | Yes                                       | 19 (0)                                                            | 2005 - 2017                                          | ✓                            | ✓                             |                               |
| Gorjana, 2017 <sup>62</sup>     | Australia                         | HPV Vaccination                                           | Unclear - 2015   | No                                        | 18 (1)                                                            | 2010 - 2015                                          | ✓                            |                               |                               |

1  
2  
3  
4  
5  
6  
7  
8  
9  
10  
11  
12  
13  
14  
15  
16  
17  
18  
19  
20  
21  
22  
23  
24  
25  
26  
27  
28  
29  
30  
31  
32  
33  
34  
35  
36  
37  
38  
39  
40  
41  
42  
43  
44  
45  
46

| Study ID (Author, Year)                    | Corresponding Author's Country | Infectious diseases           | Search period    | Includes meta-analysis (Yes/No) | Number of studies included (Number of UK studies) | Publication year range for included studies | Protected characteristics | Socioeconomic inequalities | Inclusion health groups |
|--------------------------------------------|--------------------------------|-------------------------------|------------------|---------------------------------|---------------------------------------------------|---------------------------------------------|---------------------------|----------------------------|-------------------------|
| Greenaway, 2015 <sup>22</sup>              | Canada                         | HCV                           | not reported     | Yes                             | 50(0)                                             | 1990-2013                                   | ✓                         | ✓                          | ✓                       |
| Hahne, 2013 <sup>24</sup>                  | The Netherlands                | HBV and HCV                   | 2000 - 2009      | No                              | 124 (9)                                           | Unclear                                     | ✓                         |                            | ✓                       |
| Hermann, 2019 <sup>81</sup>                | Canada                         | Vaccination                   | 2000- 2017       | No                              | 33 (15)                                           | 2001-2016                                   | ✓                         |                            |                         |
| Jackson, 2021 <sup>38</sup>                | Ireland                        | Tuberculosis and MDR-TB       | Unclear - 2020   | Yes                             | 32 (3)                                            | 2010 - 2018                                 |                           |                            | ✓                       |
| Jain, 2017 <sup>25</sup>                   | UK                             | Vaccination                   | not reported     | Yes                             | 35 (5)                                            | 1997 and 2015                               | ✓                         | ✓                          | ✓                       |
| Jin, 2020 <sup>72</sup>                    | Australia                      | HCV                           | 2000 - 2019      | Yes                             | 194 (at least 14)                                 | Unclear                                     |                           |                            | ✓                       |
| Kabapy, 2020 <sup>39</sup>                 | Egypt                          | HIV                           | 1982 - 2018      | Yes                             | 231 (unclear)                                     | Unclear                                     | ✓                         | ✓                          | ✓                       |
| Kawatsu, 2014 <sup>26</sup>                | Japan                          | TB                            | Not reported     | No                              | 18 (1)                                            | 1997 - 2012                                 | ✓                         | ✓                          | ✓                       |
| Kentikelenis, 2015 <sup>27</sup>           | UK                             | Various                       | 2007 - 2014      | No                              | 21 (unclear)                                      | not reported                                |                           | ✓                          | ✓                       |
| Lafond, 2021 <sup>97</sup>                 | USA                            | Influenza-associated lower    | 1996–2016        | Yes                             | 75 (Unclear)                                      | 1996 - 2016                                 | ✓                         |                            |                         |
| Larson, 2014 <sup>115</sup>                | UK                             | Vaccination                   | unclear - 2012   | No                              | 1164 (at least one)                               | 2007–2012                                   |                           | ✓                          |                         |
| Leumi, 2020 <sup>56</sup>                  | Cameroon                       | Hepatitis B                   | 1990 - 2017      | Yes                             | 358 (unclear)                                     | Unclear                                     | ✓                         |                            | ✓                       |
| Leung, 2019 <sup>106</sup>                 | Australia                      | HIV, HBV, HCV                 | 2008 - 2017      | Yes                             | 104(unclear)                                      | not reported                                | ✓                         |                            |                         |
| Li, P. 2020 <sup>82</sup>                  | Netherlands                    | HEV                           | inception - 2019 | Yes                             | 419(7)                                            | not reported                                | ✓                         | ✓                          |                         |
| Lindsay, 2015 <sup>83</sup>                | Belgium                        | Norovirus disease             | 2003 - 2013      | No                              | 39 (4)                                            | not reported                                | ✓                         |                            |                         |
| Lucyk, 2019 <sup>119</sup>                 | Canada                         | Vaccination- Influenza        | 2012 - 2017      | No                              | 42 (1)                                            | 2012- 2017                                  |                           | ✓                          |                         |
| Ly, 2021 <sup>51</sup>                     | France                         | Various                       | 1980 - 2020      | No                              | 81 (4)                                            | Unclear                                     | ✓                         | ✓                          | ✓                       |
| Macina, 2021 <sup>98</sup>                 | France                         | Bordetella pertussis          | 1990 - 2019      | No                              | 88 (7)                                            | Unclear                                     | ✓                         |                            |                         |
| Malerba, 2015 <sup>63</sup>                | Italy                          | Vaccination                   | 2000 - 2014      | No                              | 11 (1)                                            | 2003-2014                                   | ✓                         | ✓                          |                         |
| McBride, 2021 <sup>40</sup>                | Canada                         | HIV/STI                       | 2009 - 2019      | No                              | 29 (unclear)                                      | Not reported                                | ✓                         |                            | ✓                       |
| Millett, 2012 <sup>64</sup>                | USA                            | HIV disease                   | 1981 - 2011      | Yes                             | 194 (13)                                          | 1981-2011                                   | ✓                         | ✓                          |                         |
| Mipatrini, 2017 <sup>28</sup>              | Italy                          | Vaccination                   | 2005-2016        | No                              | 58 (7)                                            | not reported                                |                           |                            | ✓                       |
| Mirzadeh, 2021 <sup>99</sup>               | Iran                           | Trichomonas vaginalis         | 1985 - 2020.     | Yes                             | 85 (2)                                            | 1985 - 2020                                 | ✓                         |                            |                         |
| Morais, 2017 <sup>29</sup>                 | Portugal                       | <i>Helicobacter pylori</i>    | inception - 2015 | No                              | 28 (unclear)                                      | 1988-2014                                   |                           |                            | ✓                       |
| Nagata, 2013 <sup>65</sup>                 | Switzerland                    | vaccination- Influenza        | 1980 - 2011      | No                              | 80 (7)                                            | not reported                                | ✓                         | ✓                          |                         |
| Najafizada, 2020 <sup>121</sup>            | Canada                         | MDR-TB                        | 1998-2018        | No                              | 15(4)                                             | Not reported                                |                           | ✓                          |                         |
| Nava-Aguilera, 2009 <sup>49</sup>          | Mexico                         | TB                            | unclear - 2005   | Yes                             | 30 (1)                                            | 1994 - 2008                                 | ✓                         | ✓                          | ✓                       |
| Nellums, 2018b <sup>42</sup>               | UK                             | AMR                           | 2000- 2017       | Yes                             | 23 (0)                                            | 2006-2016                                   |                           |                            | ✓                       |
| Newman, 2015 <sup>111</sup>                | USA                            | Foodborne infectious diseases | 1980 - 2013      | No                              | 16 (3)                                            | not reported                                | ✓                         | ✓                          |                         |
| Nourollahpour Shiadeh, 2020 <sup>110</sup> | Iran                           | Toxoplasmosis                 | Inception -2020  | Yes                             | 14 (0)                                            | 2001- 2019                                  | ✓                         |                            |                         |
| Offer, 2015 <sup>66</sup>                  | UK                             | TB                            | 1990 - unclear   | No                              | 18 (18)                                           | 1999-2013                                   | ✓                         | ✓                          |                         |
| Okoli, 2020 <sup>30</sup>                  | Canada                         | Influenza vaccination         | Unclear - 2020   | Yes                             | 34 (1)                                            | 2004 - 2019                                 | ✓                         | ✓                          | ✓                       |
| Okoli, 2021 <sup>69</sup>                  | Canada                         | Influenza vaccination         | 2000 - 2020      | Yes                             | 36 (2)                                            | 2010-2020                                   | ✓                         | ✓                          |                         |
| Oldenburg, 2014 <sup>73</sup>              | USA                            | HIV                           | 2004 - 2013      | Yes                             | 88 (1)                                            | not reported                                | ✓                         |                            | ✓                       |
| Oldenburg, 2015 <sup>52</sup>              | USA                            | HIV                           | 2004 - 2013,     | Yes                             | 33 (0)                                            | 2004-2013                                   |                           |                            | ✓                       |
| Operario, 2008 <sup>53</sup>               | UK                             | HIV                           | 1980-2007        | Yes                             | 25 (0)                                            | 1988- 2006.                                 | ✓                         |                            | ✓                       |
| Pega 2021 <sup>41</sup>                    | Switzerland,                   | HIV                           | 2010- 2020       | Yes                             | 19(1)                                             | 2010-2019                                   |                           |                            | ✓                       |

| Study ID<br>(Author, Year)              | Corresponding<br>Author's Country | Infectious diseases        | Search period    | Includes<br>meta-<br>analysis<br>(Yes/No) | Number of studies<br>included ( <i>Number of<br/>UK studies</i> ) | Publication<br>year range for<br>included<br>studies | Protected<br>characteristics | Socioeconomic<br>inequalities | Inclusion<br>health<br>groups |
|-----------------------------------------|-----------------------------------|----------------------------|------------------|-------------------------------------------|-------------------------------------------------------------------|------------------------------------------------------|------------------------------|-------------------------------|-------------------------------|
| Platt, 2013a <sup>31</sup>              | UK                                | HIV, STIs                  | Not reported     | No                                        | 26 (1)                                                            | Not reported                                         |                              |                               | ✓                             |
| Platt, 2013b <sup>32</sup>              | UK                                | HIV, STIs                  | 2005 - 2011      | No                                        | 73 (5)                                                            | Not reported                                         |                              |                               | ✓                             |
| Possenti, 2016 <sup>84</sup>            | Italy                             | Cystic Echinococcosis      | not reported     | Yes                                       | 37(0)                                                             | 1964-2014                                            | ✓                            | ✓                             |                               |
| Prost, 2007 <sup>33</sup>               | UK                                | HIV                        | Unknown - 2005   | No                                        | 138 (unclear)                                                     | 1996 -2005                                           | ✓                            |                               | ✓                             |
| Pulver, 2016 <sup>107</sup>             | Canada                            | Vaccination                | 1980 - 2014      | No                                        | 12 (1)                                                            | 1993 - 2013                                          | ✓                            |                               | ✓                             |
| Richterman, 2018 <sup>85</sup>          | USA                               | Cholera                    | not reported     | Yes                                       | 110 (0)                                                           | 1974-2017                                            | ✓                            | ✓                             |                               |
| Rodrigo, 2010 <sup>112</sup>            | Sri Lanka                         | HIV                        | 1999 -2009       | No                                        | 98 (unclear)                                                      | not reported                                         |                              | ✓                             |                               |
| Roller-Wirnsberger, 2021 <sup>100</sup> | Austria                           | Influenza vaccination      | 2012- 2019       | No                                        | 44 (at least 1)                                                   | 2012-2018                                            | ✓                            | ✓                             |                               |
| Rossi, 2012 <sup>34</sup>               | Canada                            | HBV                        | Inception - 2011 | Yes                                       | 110 (2)                                                           | 1977 - 2011                                          |                              |                               | ✓                             |
| Rostami, 2019a <sup>87</sup>            | Iran                              | Toxocariasis               | 1980 - 2019      | Yes                                       | 250 (2)                                                           | 1980 -2019                                           | ✓                            | ✓                             |                               |
| Rostami, 2019b <sup>86</sup>            | Iran                              | Acute Toxoplasma infection | 1988 - 2018      | Yes                                       | 217 (3)                                                           | 1988 - 2018                                          | ✓                            |                               |                               |
| Rostami, 2021 <sup>101</sup>            | Iran                              | Toxoplasmosis              | 1980-2020        | Yes                                       | 150 (2)                                                           | 1987-2020                                            | ✓                            | ✓                             |                               |
| Salgado-Barreira, 2014 <sup>122</sup>   | Spain                             | HIV                        | unclear -2012    | No                                        | 24 (1)                                                            | 1983- 2010                                           |                              | ✓                             |                               |
| Sandgren, 2014 <sup>23</sup>            | Sweden                            | TB                         | 1990- 2012       | Yes                                       | 15 (1)                                                            | not reported                                         |                              |                               | ✓                             |
| Schepisi, 2018 <sup>88</sup>            | Italy                             | TB                         | unclear - 2017   | Yes                                       | 74 (13)                                                           | 1950-2017                                            | ✓                            |                               |                               |
| Schierhout, 2020 <sup>89</sup>          | Australia                         | HTLV-1                     | 1910 - 2018      | Yes                                       | 39 (0)                                                            | 1991 - 2018                                          | ✓                            |                               |                               |
| Song, 2021 <sup>102</sup>               | China                             | Drug resistant TB (MDR-TB) | 2000-2020        | Yes                                       | 37 (2 at least)                                                   | 2000-2019                                            | ✓                            |                               |                               |
| Spyromitrou-Xioufi, 2020 <sup>90</sup>  | Greece                            | Meningococcal Infection    | 2008 - 2018      | Yes                                       | 6 (0)                                                             | 1999-2017                                            | ✓                            | ✓                             |                               |
| Stockdale, 2020 <sup>54</sup>           | UK                                | HDV                        | 1998 - 2019      | Yes                                       | 282 (at least 1)                                                  | not reported                                         |                              |                               | ✓                             |
| Striffler, 2015 <sup>91</sup>           | Canada                            | Meningococcal Infection    | inception - 2013 | No                                        | 17 (6)                                                            | 1982-2012                                            | ✓                            |                               |                               |
| Suhrcke, 2011 <sup>35</sup>             | UK                                | Various                    | 1947 - 2010      | No                                        | 37 (2)                                                            | not reported                                         |                              | ✓                             | ✓                             |
| Sultana, 2021 <sup>103</sup>            | Bangladesh                        | HIV and MDR-TB             | 2010 - 2020      | Yes                                       | 54 (0)                                                            | 2010 - 2020                                          | ✓                            |                               |                               |
| Tabacchi, 2016 <sup>67</sup>            | Italy                             | Vaccination- MMR           | not reported     | Yes                                       | 45 (19)                                                           | 2000-2014                                            | ✓                            | ✓                             |                               |
| Tauli, 2016 <sup>36</sup>               | Brazil                            | Vaccination                | 1992- 2014       | No                                        | 23(0)                                                             | not reported                                         | ✓                            | ✓                             | ✓                             |
| Tavares, 2017 <sup>37</sup>             | Portugal                          | HIV-TB                     | 2000 - 2016      | No                                        | 27 (2)                                                            | 2003 - 2016                                          |                              |                               | ✓                             |
| Tollefson, 2013 <sup>45</sup>           | USA                               | TB                         | 1990 – 2011      | No                                        | 91 (0)                                                            | 1990 - 2012                                          |                              |                               | ✓                             |
| Van Gerwen, 2020 <sup>108</sup>         | USA                               | STI/HIV                    | 1968 - 2018      | Yes                                       | 25 (0)                                                            | not reported                                         | ✓                            |                               |                               |
| Vet, 2015 <sup>55</sup>                 | The Netherlands                   | Vaccination                | Inception-2014   | No                                        | 18 (0)                                                            | not reported                                         | ✓                            | ✓                             | ✓                             |
| Vukovic, 2019 <sup>123</sup>            | Italy                             | Influenza vaccination      | Unknown - 2017   | No                                        | 12 (6)                                                            | 2004 - 2017                                          |                              | ✓                             |                               |
| Wayal, 2018 <sup>68</sup>               | UK                                | STI                        | Unclear - 2016   | No                                        | 15 (15)                                                           | 2000 - 2017                                          | ✓                            |                               |                               |
| Whelan, 2021 <sup>109</sup>             | The Netherlands                   | Gonorrhoea                 | 2010 - 2019      | No                                        | 174 (1)                                                           | Unclear                                              | ✓                            |                               |                               |
| Wu, 2021 <sup>57</sup>                  | China                             | HPV                        | 1990-2019        | Yes                                       | 107 (0)                                                           | 1989-2019                                            | ✓                            |                               | ✓                             |
| Yu, 2020 <sup>43</sup>                  | USA                               | HIV/STI                    | Unclear - 2019   | No                                        | 21 (0)                                                            | 2008 -2017                                           |                              |                               | ✓                             |
| Zamani, 2018 <sup>92</sup>              | Iran                              | <i>Helicobacter pylori</i> | 2000 - 2017      | Yes                                       | 183 (2)                                                           | not reported                                         | ✓                            |                               |                               |

Online supplemental file 3: EVIDENCE MATRIX

|                           |           | Infectious diseases: Author, year (number of UK studies included) |                                                                    |                                                                               |                                                                     |                                                                                                                                                                                                                                                                                                             |                                                                                                          |                                                                                                                                                                                                                                                                                                                                                                                                                                                |
|---------------------------|-----------|-------------------------------------------------------------------|--------------------------------------------------------------------|-------------------------------------------------------------------------------|---------------------------------------------------------------------|-------------------------------------------------------------------------------------------------------------------------------------------------------------------------------------------------------------------------------------------------------------------------------------------------------------|----------------------------------------------------------------------------------------------------------|------------------------------------------------------------------------------------------------------------------------------------------------------------------------------------------------------------------------------------------------------------------------------------------------------------------------------------------------------------------------------------------------------------------------------------------------|
| Dimension of inequalities | Variables | Tuberculosis                                                      | HIV                                                                | STI                                                                           | Hepatitis C                                                         | immunisation                                                                                                                                                                                                                                                                                                | AMR/multi-drug resistance                                                                                | Other infectious diseases                                                                                                                                                                                                                                                                                                                                                                                                                      |
| Protected characteristics | Age       | Nava-Aguilera, 2009 (1)<br>Schepisi, 2018 (13)                    | Ghiasvand, 2020 (0)<br>Behera, 2018 (unclear)<br>Sultana, 2021 (0) | Crichton, 2015 (3)<br>Denning, 2018 (2)<br>Wu, 2021 (0)<br>Mirzadeh, 2021 (2) | Colledge, 2020 (16)<br>Greenaway, 2015 (0)<br>Dugan, 2021 (unclear) | Vet, 2015 (0)<br>Okoli, 2020 (1)<br>Gorjana, 2017 (1)<br>Fernández, 2015 (8)<br>Tabacchi, 2016 (19)<br>Nagata, 2013 (unclear, at least 1)<br>Falagas, 2008 (1)<br>Hermann, 2019 (15)<br>Tauli, 2016 (0)<br>Malerba, 2015 (1)<br>Okoli, 2021 (2)<br>Roller-Wirnsberger, 2021 (at least 1)<br>Faria, 2021 (0) | Abraha, 2018 (unclear, at least 1)<br>Faustini, 2005 (3)<br>Song, 2021 (at least 2)<br>Sultana, 2021 (0) | Leumi, 2020 (unclear)<br>Macina, 2021 (7)<br>Lafond, 2021 (unclear)<br>Dong, 2020 (unclear)<br>Bonten, 2020 (21)<br>Ly, 2021 (4)<br>Li, 2020 (7)<br>Rostami, 2019a (2)<br>Rostami, 2019b (3)<br>Rostami, 2021 (2)<br>Badri, 2021 (4)<br>Schierhout, 2020 (0)<br>Adams, 2018 (unclear, at least 1)<br>Zamani, 2018 (2)<br>Lindsay, 2015 (4)<br>Possenti, 2016 (0)<br>Richterman, 2018 (0)<br>Strifler, 2015 (6)<br>Spyromitrou-Xioufi, 2020 (0) |



| Dimension of inequalities | Variables                      | Infectious diseases: Author, year (number of UK studies included) |                                                                                                                                                                  |                                                                                           |                                                                  |                                                                                                                                           |                                                          |                                                                                                                                                                                                                                                                                        |
|---------------------------|--------------------------------|-------------------------------------------------------------------|------------------------------------------------------------------------------------------------------------------------------------------------------------------|-------------------------------------------------------------------------------------------|------------------------------------------------------------------|-------------------------------------------------------------------------------------------------------------------------------------------|----------------------------------------------------------|----------------------------------------------------------------------------------------------------------------------------------------------------------------------------------------------------------------------------------------------------------------------------------------|
|                           |                                | Tuberculosis                                                      | HIV                                                                                                                                                              | STI                                                                                       | Hepatitis C                                                      | immunisation                                                                                                                              | AMR/multi-drug resistance                                | Other infectious diseases                                                                                                                                                                                                                                                              |
|                           | Sex                            | Beijer, 2012 (4)<br>Nava-Aguilera, 2009 (1)                       | Beijer, 2012 (0)<br>Operario, 2008 (0)<br>Van Gerwen, 2020 (0)<br>Leung, 2019 (unclear)<br>Eilami, 2019 (1)<br>Kabapy, 2020 (unclear)<br>McBride, 2021 (unclear) | Crichton, 2015 (3)<br>Van Gerwen, 2020 (0)<br>Whelan, 2021 (1)<br>McBride, 2021 (unclear) | Beijer, 2012 (1)<br>Colledge, 2020 (16)<br>Leung, 2019 (unclear) | Pulver, 2016 (1)<br>Tabacchi, 2016 (19)<br>Nagata, 2013 (unclear, at least 1)<br>Roller-Wirnsberger, 2021 (at least 1)<br>Faria, 2021 (0) | Abraha, 2018 (unclear, at least 1)<br>Faustini, 2005 (3) | Leung, 2019 (unclear)<br>Aldridge, 2018 (unclear, at least 1)<br>Ly, 2021 (4)<br>Spyromitrou-Xioufi, 2020 (0)<br>Possenti, 2016 (0)<br>Richterman, 2018 (0)<br>Rostami, 2021 (2)<br>Schierhout, 2020 (0)<br>Fauroux, 2017 (8)<br>Rostami, 2019a (2)<br>Badri, 2021 (4)<br>Li, 2020 (7) |
|                           | Marriage and civil partnership |                                                                   |                                                                                                                                                                  |                                                                                           |                                                                  | Okoli, 2020 (1)<br>Nagata, 2013 (unclear, at least 1)<br>Jain, 2017 (5)<br>Tabacchi, 2016 (19)<br>Okoli, 2021 (2)<br>Faria, 2021 (0)      |                                                          |                                                                                                                                                                                                                                                                                        |
|                           | Pregnancy and maternity        |                                                                   |                                                                                                                                                                  |                                                                                           | Hahne, 2013 (9)<br>Greenaway, 2015 (0)                           |                                                                                                                                           |                                                          | Hahne, 2013 (9)<br>Leumi, 2020 (unclear)                                                                                                                                                                                                                                               |

1  
2  
3  
4  
5  
6  
7  
8  
9  
10  
11  
12  
13  
14  
15  
16  
17  
18  
19  
20  
21  
22  
23  
24  
25  
26  
27  
28  
29  
30  
31  
32  
33  
34  
35  
36  
37  
38  
39  
40  
41  
42  
43  
44  
45  
46

| Dimension of inequalities | Variables           | Infectious diseases: Author, year (number of UK studies included)             |                                                         |                               |             |                                                                                                                                                                                                                                               |                                    |                                 |
|---------------------------|---------------------|-------------------------------------------------------------------------------|---------------------------------------------------------|-------------------------------|-------------|-----------------------------------------------------------------------------------------------------------------------------------------------------------------------------------------------------------------------------------------------|------------------------------------|---------------------------------|
|                           |                     | Tuberculosis                                                                  | HIV                                                     | STI                           | Hepatitis C | immunisation                                                                                                                                                                                                                                  | AMR/multi-drug resistance          | Other infectious diseases       |
|                           |                     |                                                                               |                                                         |                               |             |                                                                                                                                                                                                                                               |                                    | Nourollahpour Shiadeh, 2020 (0) |
|                           | Race (or ethnicity) | Nava-Aguilera, 2009 (1)<br>Offer, 2015 (18) <sup>α</sup><br>Kawatsu, 2014 (1) | Millett, 2012 (13)<br>Prost, 2007 (unclear, at least 3) | Wayal, 2018 (15) <sup>α</sup> |             | Vet, 2015 (0)<br>Okoli, 2020 (1)<br>Gorjana, 2017 (1)<br>Fernández, 2015 (8)<br>Fisher, 2013 (1)<br>Tabacchi, 2016 (19)<br>Nagata, 2013 (unclear, at least 1)<br>Falagas, 2008 (1)<br>Tauli, 2016 (0)<br>Malerba, 2015 (0)<br>Okoli, 2021 (2) | Abraha, 2018 (unclear, at least 1) | Ly, 2021 (4)                    |
|                           | Religion or belief  |                                                                               |                                                         |                               |             | Fisher, 2013 (1)<br>Jain, 2017 (5)<br>Fournet, 2018 (unclear, at least 1)<br>Malerba, 2015 (0)<br>Falagas, 2008 (1)                                                                                                                           |                                    | Spyromitrou-Xioufi, 2020 (0)    |

| Dimension of inequalities | Variables           | Infectious diseases: Author, year (number of UK studies included)                                                |                                                                                                                                   |                                                                                                 |                                                                                                                      |                                                                                                  |                                         |                                                                                                                                                    |
|---------------------------|---------------------|------------------------------------------------------------------------------------------------------------------|-----------------------------------------------------------------------------------------------------------------------------------|-------------------------------------------------------------------------------------------------|----------------------------------------------------------------------------------------------------------------------|--------------------------------------------------------------------------------------------------|-----------------------------------------|----------------------------------------------------------------------------------------------------------------------------------------------------|
|                           |                     | Tuberculosis                                                                                                     | HIV                                                                                                                               | STI                                                                                             | Hepatitis C                                                                                                          | immunisation                                                                                     | AMR/multi-drug resistance               | Other infectious diseases                                                                                                                          |
|                           | Sexual orientation  |                                                                                                                  | Fakoya, 2015 (9)<br>Oldenburg, 2014 (1)<br>Operario, 2008 (0)<br>Chen, 2019 (1)                                                   |                                                                                                 | Hahne, 2013 (9)<br>Jin, 2020 (at least 14)                                                                           |                                                                                                  | Abraha, 2018 (unclear, at least 1)      | Hahne, 2013 (9)<br>Leumi, 2020 (unclear)<br>Ly, 2021 (4)<br>Stockdale, 2020 (unclear, at least 1)                                                  |
|                           | Gender reassignment |                                                                                                                  | Operario, 2008 (0)                                                                                                                |                                                                                                 |                                                                                                                      |                                                                                                  |                                         | Leumi, 2020 (unclear)                                                                                                                              |
|                           | Disability          |                                                                                                                  |                                                                                                                                   |                                                                                                 |                                                                                                                      |                                                                                                  |                                         | Newman, 2015 (3)                                                                                                                                   |
| Inclusion Health Groups   | Vulnerable migrants |                                                                                                                  | Yu, 2020 (0)                                                                                                                      | Yu, 2020 (0)                                                                                    | Chernet, 2017 (unclear)<br>Greenaway, 2015 (0)                                                                       | Mipatrini, 2017 (7)<br>De Vito, 2017 (4)                                                         | Nellums, 2018 (0)                       | Rossi, 2012 (2)<br>Chernet, 2017 (unclear)<br>Mipatrini, 2017 (7)<br>Chernet, 2017 (unclear)                                                       |
|                           | General migrants    | Tavares, 2017 (2) <sup>β</sup><br>Chan, 2017 (1)<br>Kawatsu, 2014 (1)<br>Sandgren, 2014 (1)<br>Jackson, 2021 (3) | Tavares, 2017 (2) <sup>β</sup><br>Platt, 2013a (1)<br>Platt, 2013b (5)<br>Prost, 2007 (unclear, at least 3)<br>Kentikelenis, 2015 | Platt, 2011a (1)<br>Platt, 2013b (5)<br>Kentikelenis, 2015 (unclear)<br>McBride, 2021 (unclear) | Hahne, 2013 (9)<br>Chernet, 2017 (unclear)<br>Greenaway, 2015 (0)<br>Kentikelenis, 2015 (unclear)<br>Falla, 2018 (1) | Okoli, 2020 (1)<br>Mipatrini, 2017 (7)<br>De Vito, 2017 (4)<br>Jain, 2017 (5)<br>Tauli, 2016 (0) | Faustini, 2005 (3)<br>Jackson, 2021 (3) | Rossi, 2012 (2)<br>Hahne, 2013 (9)<br>Chernet, 2017 (unclear)<br>Kentikelenis, 2015 (unclear)<br>Suhrcke, 2011 (unclear)<br>Morais, 2017 (unclear) |

| Dimension of inequalities | Variables                                            | Infectious diseases: Author, year (number of UK studies included) |                                                                                          |                              |                                    |                                     |                                      |                                                                                 |
|---------------------------|------------------------------------------------------|-------------------------------------------------------------------|------------------------------------------------------------------------------------------|------------------------------|------------------------------------|-------------------------------------|--------------------------------------|---------------------------------------------------------------------------------|
|                           |                                                      | Tuberculosis                                                      | HIV                                                                                      | STI                          | Hepatitis C                        | immunisation                        | AMR/multi-drug resistance            | Other infectious diseases                                                       |
|                           |                                                      |                                                                   | (unclear)<br>Pega 2021<br>(1)<br>Kabapy, 2020<br>(unclear)<br>McBride, 2021<br>(unclear) |                              |                                    |                                     |                                      |                                                                                 |
|                           | People experiencing homelessness and rough sleeping  | Beijer, 2012 (4)<br>Nava-Aguilera, 2009 (1)<br>Kawatsu, 2014 (1)  | Beijer, 2012 (0)<br>Arum, 2021 (6)                                                       |                              | Beijer, 2012 (1)<br>Arum, 2021 (6) |                                     | Alividza, 2018 (unclear, at least 2) | Aldridge, 2018 (unclear, at least 1)<br>Suhrcke, 2011 (unclear)<br>Ly, 2021 (4) |
|                           | People who engage in sex work                        |                                                                   | Yu, 2020 (0)<br>Oldenburg, 2015 (0)<br>Operario, 2008 (0)<br>Kabapy, 2020 (unclear)      | Yu, 2020 (0)<br>Wu, 2021 (0) |                                    | Vet, 2015 (0)                       |                                      | Leumi, 2020 (unclear)<br>Stockdale, 2020 (unclear, at least 1)                  |
|                           | Gypsy Roma/ Traveller communities /Indigenous people | Tollefson, 2013 (0)<br>Cormier 2019 (0)                           |                                                                                          |                              |                                    | Fournet, 2018 (unclear, at least 1) |                                      |                                                                                 |

| Dimension of inequalities  | Variables                 | Infectious diseases: Author, year (number of UK studies included) |                                                                                                |                    |             |                                                                                                                                                                                                                                                                                                                                                                                                                       |                                                                                      |                                                                                                                                                                                                                                    |
|----------------------------|---------------------------|-------------------------------------------------------------------|------------------------------------------------------------------------------------------------|--------------------|-------------|-----------------------------------------------------------------------------------------------------------------------------------------------------------------------------------------------------------------------------------------------------------------------------------------------------------------------------------------------------------------------------------------------------------------------|--------------------------------------------------------------------------------------|------------------------------------------------------------------------------------------------------------------------------------------------------------------------------------------------------------------------------------|
|                            |                           | Tuberculosis                                                      | HIV                                                                                            | STI                | Hepatitis C | immunisation                                                                                                                                                                                                                                                                                                                                                                                                          | AMR/multi-drug resistance                                                            | Other infectious diseases                                                                                                                                                                                                          |
| Socioeconomic inequalities | Level of education/income | Kawatsu, 2014 (1)                                                 | Rodrigo, 2010 (unclear)<br>Ghiasvand, 2020 (0)<br>Millett, 2012 (13)<br>Kabapy, 2020 (unclear) | Crichton, 2015 (3) |             | Vet, 2015 (0)<br>Larson, 2014 (at least one)<br>Okoli, 2020 (1)<br>Arat, 2019 (2)<br>Fernández, 2015 (8)<br>Forshaw, 2017 (0)<br>Fisher, 2013 (1)<br>Tabacchi, 2016 (19)<br>Nagata, 2013 (unclear, at least 1)<br>Lucyk, 2019 (1)<br>De Vito, 2017 (4)<br>Bocquier, 2017 (5)<br>Jain, 2017 (5)<br>Tauli, 2016 (0)<br>Malerba, 2015 (0)<br>Okoli, 2021 (2)<br>Roller-Wirnsberger, 2021 (at least 1)<br>Faria, 2021 (0) | Di Gennaro, 2017 (1)<br>Alividza, 2018 (unclear, at least 2)<br>Najafizada, 2020 (4) | Ding, 2020 (0)<br>Coffey, 2018 (unclear)<br>Adams, 2018 (unclear, at least 1)<br>Newman, 2015 (3)<br>Possenti, 2016 (0)<br>Richterman, 2018 (0)<br>Spyromitrou-Xioufi, 2020 (0)<br>Dong, 2020 (unclear)<br>Suhrcke, 2011 (unclear) |

1  
2  
3  
4  
5  
6  
7  
8  
9  
10  
11  
12  
13  
14  
15  
16  
17  
18  
19  
20  
21  
22  
23  
24  
25  
26  
27  
28  
29  
30  
31  
32  
33  
34  
35  
36  
37  
38  
39  
40  
41  
42  
43  
44  
45  
46

| Dimension of inequalities | Variables                                    | Infectious diseases: Author, year (number of UK studies included) |                                                    |                                                    |                              |                                                                                                                                                                                                                                                 |                           |                                                                                                                                 |
|---------------------------|----------------------------------------------|-------------------------------------------------------------------|----------------------------------------------------|----------------------------------------------------|------------------------------|-------------------------------------------------------------------------------------------------------------------------------------------------------------------------------------------------------------------------------------------------|---------------------------|---------------------------------------------------------------------------------------------------------------------------------|
|                           |                                              | Tuberculosis                                                      | HIV                                                | STI                                                | Hepatitis C                  | immunisation                                                                                                                                                                                                                                    | AMR/multi-drug resistance | Other infectious diseases                                                                                                       |
|                           | Employment /occupation                       | Kawatsu, 2014 (1)                                                 | Kentikelenis, 2015 (unclear)<br>Millett, 2012 (13) | Crichton, 2015 (3)<br>Kentikelenis, 2015 (unclear) | Kentikelenis, 2015 (unclear) | Arat, 2019 (2)<br>Tabacchi, 2016 (19)<br>Nagata, 2013 (unclear, at least 1)<br>Lucyk, 2019 (1)<br>De Vito, 2017 (4)<br>Bocquier, 2017 (5)<br>Tauli, 2016 (0)<br>Malerba, 2015 (0)<br>Okoli, 2021 (2)<br>Faria, 2021 (0)                         |                           | Kentikelenis, 2015 (unclear)<br>Li, 2020 (7)<br>Coffey, 2018 (unclear)<br>Adams, 2018 (unclear, at least 1)<br>Newman, 2015 (3) |
|                           | Social class/Area level socioeconomic status |                                                                   | Salgado-Barreira, 2014 (1) <sup>v</sup>            |                                                    |                              | Arat, 2019 (2)<br>Okoli, 2020 (1)<br>Fernández, 2015 (8)<br>Nagata, 2013 (unclear, at least 1)<br>Lucyk, 2019 (1)<br>Jain, 2017 (5)<br>Falagas, 2008 (1)<br>Tauli, 2016 (0)<br>Malerba, 2015 (0)<br>Okoli, 2021 (2)<br>Roller-Wirnsberger, 2021 |                           | Salgado-Barreira, 2014 (1)                                                                                                      |

| Dimension of inequalities | Variables                                                                                                        | Infectious diseases: Author, year (number of UK studies included) |     |                    |             |                                                                                                                                                              |                                                              |                                                                                                                                                                                                                                  |
|---------------------------|------------------------------------------------------------------------------------------------------------------|-------------------------------------------------------------------|-----|--------------------|-------------|--------------------------------------------------------------------------------------------------------------------------------------------------------------|--------------------------------------------------------------|----------------------------------------------------------------------------------------------------------------------------------------------------------------------------------------------------------------------------------|
|                           |                                                                                                                  | Tuberculosis                                                      | HIV | STI                | Hepatitis C | immunisation                                                                                                                                                 | AMR/multi-drug resistance                                    | Other infectious diseases                                                                                                                                                                                                        |
|                           | Deprivation                                                                                                      | Offer, 2015 (18) <sup>a</sup>                                     |     | Crichton, 2015 (3) |             | Vukovic, 2019 (6)<br>Fisher, 2013 (1)<br>Nagata, 2013 (unclear, at least 1)<br>Lucyk, 2019 (1)                                                               |                                                              | Adams, 2018 (unclear, at least 1)<br>Newman, 2015 (3)                                                                                                                                                                            |
|                           | Residence/living situation (e.g urban vs rural, living in a home environment with moisture damage, house tenure) | Nava-Aguilera, 2009 (1)<br>Cormier 2019 (0)                       |     |                    |             | Okoli, 2020 (1)<br>Fernández, 2015 (8)<br>Tabacchi, 2016 (19)<br>Nagata, 2013 (unclear, at least 1)<br>Tauli, 2016 (0)<br>Okoli, 2021 (2)<br>Faria, 2021 (0) | Alividza, 2018 (unclear, at least 2)<br>Najafizada, 2020 (4) | Ly, 2021 (4)<br>Dong, 2020 (unclear)<br>Spyromitrou-Xioufi, 2020 (0)<br>Newman, 2015 (3)<br>Possenti, 2016 (0)<br>Richterman, 2018 (0)<br>Coffey, 2018 (unclear)<br>Rostami, 2021 (2)<br>Fauroux, 2017 (8)<br>Rostami, 2019a (2) |

**Online supplemental file 4: ASSESSMENT OF INDIVIDUAL REVIEWS USING ASSESSMENT OF MULTIPLE SYSTEMATIC REVIEWS VERSION 2 (AMSTAR2) CHECKLIST**

| Study ID (Author, Year) | 1 | 2  | 3 | 4  | 5 | 6 | 7 | 8  | 9  | 10 | 11  | 12  | 13 | 14 | 15  | 16 |
|-------------------------|---|----|---|----|---|---|---|----|----|----|-----|-----|----|----|-----|----|
| Tavares, 2017           | Y | N  | Y | PY | N | N | N | Y  | N  | N  | NMC | NMC | Y  | N  | NMC | Y  |
| Tollefson, 2013         | Y | N  | N | PY | Y | Y | N | Y  | N  | N  | NMC | NMC | N  | N  | NMC | Y  |
| Vet, 2015               | Y | N  | N | PY | N | N | N | PY | Y  | N  | NMC | NMC | Y  | N  | NMC | Y  |
| Beijer 2012             | Y | N  | N | PY | N | Y | N | Y  | N  | N  | Y   | Y   | N  | Y  | N   | Y  |
| Behera, 2018            | Y | N  | N | PY | N | N | N | N  | N  | N  | NMC | NMC | N  | N  | NMC | Y  |
| Vukovic, 2019           | Y | N  | N | PY | Y | Y | N | Y  | Y  | N  | NMC | NMC | N  | N  | NMC | Y  |
| Platt, 2013a            | Y | N  | N | PY | N | N | N | Y  | PY | N  | NMC | NMC | Y  | Y  | NMC | Y  |
| Platt, 2013b            | Y | N  | N | Y  | N | N | N | N  | PY | N  | NMC | NMC | Y  | Y  | NMC | Y  |
| Prost, 2007             | Y | N  | N | Y  | N | N | N | PY | N  | N  | NMC | NMC | N  | N  | NMC | N  |
| Pulver, 2016            | Y | N  | N | PY | Y | Y | N | Y  | N  | N  | NMC | NMC | Y  | Y  | NMC | N  |
| Rossi, 2012             | Y | PY | N | Y  | Y | Y | N | PY | N  | N  | Y   | N   | N  | Y  | N   | Y  |
| Rostami, 2019           | Y | Y  | N | PY | N | Y | N | PY | N  | N  | Y   | N   | Y  | Y  | Y   | Y  |
| Di Gennaro, 2017        | Y | N  | N | PY | N | Y | N | Y  | Y  | N  | Y   | Y   | Y  | Y  | Y   | N  |
| Fauroux, 2017           | Y | PY | N | Y  | N | N | N | Y  | Y  | N  | NMC | NMC | Y  | Y  | NMC | Y  |



| Study ID<br>(Author, Year) | 1 | 2   | 3 | 4   | 5 | 6 | 7 | 8   | 9   | 10 | 11    | 12    | 13 | 14 | 15    | 16 |
|----------------------------|---|-----|---|-----|---|---|---|-----|-----|----|-------|-------|----|----|-------|----|
| Hahne, 2013                | Y | P Y | N | P Y | N | Y | N | N   | P Y | N  | N M C | N M C | N  | Y  | N M C | Y  |
| Jin, 20                    | Y | Y   | N | P Y | Y | N | N | N   | P Y | N  | Y     | Y     | Y  | Y  | N     | Y  |
| Larson, 2014               | N | N   | N | P Y | N | N | N | N   | N   | N  | N M C | N M C | N  | N  | N M C | Y  |
| Nava-Aguilera,<br>2009     | N | N   | N | P Y | N | Y | N | Y   | Y   | N  | Y     | Y     | Y  | Y  | Y     | N  |
| Okoli, 2020                | Y | Y   | N | P Y | Y | Y | N | Y   | Y   | N  | Y     | Y     | Y  | Y  | Y     | Y  |
| Schierhout,<br>2020        | N | N   | N | P Y | Y | N | N | P Y | Y   | N  | Y     | Y     | Y  | Y  | Y     | Y  |
| Wayal, 2018                | Y | N   | N | Y   | N | Y | N | Y   | Y   | N  | N M C | N M C | Y  | Y  | N M C | Y  |
| Yu, 2020                   | Y | N   | N | P Y | N | N | N | Y   | N   | N  | N M C | N M C | N  | N  | N M C | Y  |
| Gorjana, 2017              | Y | N   | N | P Y | N | N | N | Y   | Y   | N  | N M C | N M C | Y  | Y  | N M C | Y  |
| Rodrigo, 2010              | Y | N   | N | P Y | N | Y | N | N   | N   | N  | N M C | N M C | N  | N  | N M C | Y  |
| Rostami, 2019b             | Y | Y   | N | Y   | Y | Y | N | Y   | N   | N  | Y     | Y     | N  | Y  | N     | Y  |
| Coffey, 2018               | Y | N   | N | P Y | N | N | N | N   | Y   | N  | N M C | N M C | N  | Y  | N M C | N  |
| Ghiasvand,<br>2020         | Y | N   | N | P Y | Y | N | N | P Y | Y   | N  | Y     | Y     | Y  | Y  | Y     | Y  |
| Cormier 2019               | Y | N   | N | P Y | Y | N | N | N   | N   | N  | N M C | N M C | N  | N  | N M C | Y  |
| Abraha, 2018               | Y | N   | N | N   | N | N | N | N   | N   | N  | N M C | N M C | N  | Y  | N M C | N  |

| Study ID<br>(Author, Year) | 1 | 2   | 3 | 4   | 5 | 6 | 7 | 8   | 9   | 10 | 11    | 12    | 13 | 14 | 15    | 16 |
|----------------------------|---|-----|---|-----|---|---|---|-----|-----|----|-------|-------|----|----|-------|----|
| Adams, 2018                | Y | Y   | N | Y   | Y | N | N | P Y | Y   | N  | Y     | Y     | Y  | Y  | Y     | N  |
| Aldridge, 2018             | N | N   | N | N   | N | Y | N | N   | N   | N  | Y     | N     | N  | Y  | N     | Y  |
| Alividza, 2018             | Y | N   | N | P Y | Y | N | N | Y   | Y   | N  | N M C | N M C | Y  | N  | N M C | Y  |
| Arat, 2019                 | Y | N   | N | P Y | Y | N | N | Y   | N   | N  | N M C | N M C | Y  | Y  | N M C | Y  |
| Chan, 2017                 | Y | N   | N | N   | Y | Y | N | N   | Y   | N  | Y     | Y     | Y  | Y  | N     | Y  |
| Chernet,2017               | N | N   | N | P Y | Y | N | N | N   | N   | N  | N     | N     | N  | Y  | N     | Y  |
| Colledge, 2020             | Y | N   | N | N   | N | N | N | N   | N   | N  | N M C | N M C | N  | N  | N M C | Y  |
| Crichton,2015              | Y | P Y | Y | P Y | N | N | N | N   | P Y | N  | Y     | Y     | Y  | Y  | N     | Y  |
| Eilami, 2019               | Y | N   | N | P Y | N | N | N | N   | N   | N  | Y     | N     | N  | Y  | Y     | Y  |
| Fakoya, 2015               | Y | P Y | N | P Y | Y | N | N | P Y | N   | N  | N M C | N M C | Y  | N  | N M C | Y  |
| Faustini, 2005             | Y | N   | N | P Y | N | N | N | N   | N   | N  | Y     | N     | N  | Y  | N     | Y  |
| Fernández,<br>2015         | Y | N   | N | P Y | N | N | N | Y   | N   | N  | N M C | Y     | Y  | N  | N M C | Y  |
| Forshaw, 2017              | Y | N   | N | P Y | Y | N | N | Y   | P Y | N  | Y     | N     | Y  | Y  | Y     | Y  |
| Fisher, 2013               | Y | N   | N | P Y | N | N | N | Y   | N   | N  | Y     | Y     | Y  | Y  | N     | Y  |
| Greenaway,<br>2015         | Y | N   | N | P Y | N | N | N | N   | Y   | N  | Y     | N     | N  | Y  | N     | Y  |

| Study ID<br>(Author, Year) | 1 | 2   | 3 | 4   | 5 | 6 | 7 | 8   | 9   | 10 | 11    | 12    | 13 | 14 | 15    | 16 |
|----------------------------|---|-----|---|-----|---|---|---|-----|-----|----|-------|-------|----|----|-------|----|
| Sandgren, 2014.            | Y | N   | N | P Y | Y | Y | N | Y   | N   | N  | Y     | N     | N  | Y  | N     | N  |
| Schepisi, 2018.            | Y | Y   | N | P Y | Y | N | N | N   | Y   | N  | Y     | N     | N  | Y  | N     | Y  |
| Suhrcke, 2011.             | Y | N   | N | Y   | Y | Y | N | Y   | N   | N  | N M C | N M C | N  | Y  | N M C | Y  |
| Stockdale, 2020.           | Y | Y   | N | Y   | Y | Y | N | N   | P Y | N  | Y     | Y     | Y  | Y  | N     | Y  |
| Tabacchi                   | Y | N   | N | Y   | N | N | N | Y   | N   | N  | Y     | N     | N  | Y  | Y     | Y  |
| Strifler                   | Y | N   | N | P Y | Y | Y | N | Y   | Y   | N  | N M C | N M C | N  | Y  | N M C | N  |
| Nagata, 2011               | Y | P Y | N | P Y | N | Y | N | N   | P Y | N  | N M C | N M C | N  | Y  | N M C | Y  |
| Nellums, 2018              | Y | Y   | N | P Y | Y | Y | N | Y   | P Y | N  | Y     | Y     | Y  | Y  | N     | Y  |
| Newman, 2015               | Y | Y   | N | P Y | Y | Y | N | P Y | Y   | N  | Y     | Y     | Y  | Y  | Y     | Y  |
| Oldenburg, 2014            | Y | P Y | N | Y   | N | Y | N | N   | Y   | N  | Y     | N     | Y  | Y  | Y     | Y  |
| Oldenburg_2015             | Y | N   | N | P Y | N | Y | N | N   | N   | N  | Y     | N     | N  | Y  | N     | Y  |
| Operario 2008              | Y | N   | N | Y   | Y | Y | N | N   | P Y | N  | Y     | N     | N  | Y  | Y     | N  |
| Offer_2015                 | Y | N   | N | P Y | Y | Y | N | Y   | N   | N  | N M C | N M C | N  | N  | N M C | N  |
| Mipatrini, 2017            | N | N   | Y | N   | Y | N | N | N   | N   | N  | N M C | N M C | N  | N  | N M C | Y  |
| Lucyk, 2019.               | N | N   | N | N   | Y | N | N | P Y | P Y | N  | N M C | N M C | Y  | N  | N M C | Y  |

1  
2  
3  
4  
5  
6  
7  
8  
9  
10  
11  
12  
13  
14  
15  
16  
17  
18  
19  
20  
21  
22  
23  
24  
25  
26  
27  
28  
29  
30  
31  
32  
33  
34  
35  
36  
37  
38  
39  
40  
41  
42  
43  
44  
45  
46

| Study ID (Author, Year)  | 1 | 2 | 3 | 4   | 5 | 6 | 7 | 8   | 9   | 10 | 11    | 12    | 13 | 14 | 15    | 16 |
|--------------------------|---|---|---|-----|---|---|---|-----|-----|----|-------|-------|----|----|-------|----|
| De Vito, 2017            | Y | N | Y | P Y | N | N | N | N   | N   | N  | N M C | N M C | N  | N  | N M C | N  |
| Bocquier, 2017           | Y | N | N | P Y | Y | N | N | N   | N   | N  | N M C | N M C | Y  | Y  | N M C | Y  |
| Morais, 2017             | Y | Y | N | N   | Y | Y | N | N   | N   | N  | N M C | N M C | N  | N  | N M C | Y  |
| Spyromitrou-Xioufi, 2020 | Y | N | N | N   | Y | Y | N | Y   | P Y | N  | Y     | Y     | Y  | Y  | Y     | Y  |
| Van Gerwen, 2020         | Y | N | N | N   | Y | N | N | Y   | N   | N  | Y     | N     | N  | Y  | N     | N  |
| Zamani, 2018.            | N | N | N | N   | Y | N | N | N   | N   | N  | Y     | N     | N  | Y  | N     | Y  |
| Jain, 2017               | Y | N | N | Y   | N | N | N | Y   | Y   | N  | Y     | Y     | Y  | Y  | Y     | Y  |
| Kentikelenis, 2015       | Y | N | N | Y   | N | N | N | N   | N   | N  | N M C | N M C | N  | N  | N M C | Y  |
| Li, P. 2020              | Y | N | N | P Y | Y | Y | N | Y   | Y   | N  | Y     | Y     | Y  | Y  | Y     | Y  |
| Leung,2019               | Y | Y | N | Y   | N | N | N | P Y | N   | N  | Y     | N     | N  | Y  | N     | Y  |
| Lindsay,2015             | Y | N | N | P Y | N | N | N | Y   | N   | N  | N M C | N M C | N  | N  | N M C | Y  |
| Salgado-Barreira         | Y | N | N | P Y | Y | N | N | Y   | N   | N  | N M C | N M C | Y  | Y  | N M C | N  |
| Fournet, 2018.           | N | N | N | N   | Y | N | N | N   | N   | N  | N M C | N M C | N  | N  | N M C | Y  |
| Bonten et al., 2020      | Y | N | N | P Y | N | N | N | N   | N   | N  | Y     | N     | N  | Y  | N     | Y  |

| Study ID<br>(Author, Year)        | 1 | 2 | 3 | 4   | 5 | 6 | 7 | 8   | 9   | 10 | 11    | 12    | 13 | 14 | 15    | 16 |
|-----------------------------------|---|---|---|-----|---|---|---|-----|-----|----|-------|-------|----|----|-------|----|
| Chen et al.,<br>2019              | N | N | N | P Y | N | Y | N | N   | Y   | N  | Y     | Y     | Y  | Y  | Y     | Y  |
| Denning et al.,<br>2018           | N | N | N | Y   | Y | N | N | P Y | P Y | N  | Y     | Y     | N  | N  | N     | Y  |
| Falagas &<br>Zarkadoulia,<br>2008 | Y | N | N | P Y | N | N | N | Y   | N   | N  | N M C | N M C | N  | Y  | N M C | N  |
| Falla et al.,<br>2018             | N | N | N | P Y | N | N | N | N   | P Y | N  | N M C | N M C | N  | Y  | N M C | Y  |
| Hermann et al.,<br>2019           | Y | Y | N | Y   | Y | N | N | N   | Y   | N  | N M C | N M C | Y  | Y  | N M C | N  |
| Millett et al.,<br>2012           | Y | N | N | Y   | N | N | N | N   | N   | N  | Y     | N     | Y  | N  | N     | Y  |
| Kawatsu, 2014                     | Y | N | N | N   | N | N | N | P Y | N   | N  | N M C | N M C | N  | Y  | N M C | Y  |
| Possenti, 2016                    | N | N | N | P Y | N | Y | N | N   | P Y | N  | Y     | Y     | Y  | Y  | Y     | Y  |
| Richterman,<br>2018               | Y | N | N | P Y | Y | Y | N | N   | Y   | N  | Y     | Y     | Y  | Y  | Y     | Y  |
| Tauli, 2016                       | Y | N | N | P Y | N | N | N | Y   | N   | N  | N M C | N M C | N  | N  | N M C | Y  |
| Malerba, 2015                     | Y | N | N | Y   | Y | Y | N | P Y | N   | N  | N M C | N M C | N  | N  | N M C | Y  |
| Leumi, 2020                       | Y | Y | N | Y   | Y | Y | N | Y   | Y   | N  | Y     | Y     | Y  | Y  | Y     | Y  |

| Study ID<br>(Author, Year) | 1 | 2   | 3 | 4   | 5 | 6 | 7   | 8   | 9   | 10 | 11    | 12    | 13 | 14 | 15    | 16 |
|----------------------------|---|-----|---|-----|---|---|-----|-----|-----|----|-------|-------|----|----|-------|----|
| Arum, 2021                 | Y | Y   | N | P Y | Y | Y | N   | Y   | Y   | N  | Y     | Y     | Y  | Y  | Y     | Y  |
| Mirzadedh,<br>2021         | Y | N   | N | Y   | Y | N | N   | P Y | Y   | N  | Y     | Y     | Y  | Y  | Y     | Y  |
| Macina, 2021               | Y | N   | N | Y   | N | N | N   | Y   | N   | N  | N M C | N M C | N  | N  | N M C | Y  |
| Ly, 2021                   | Y | Y   | N | Y   | Y | N | N   | Y   | N   | N  | N M C | N M C | N  | N  | N M C | Y  |
| Lafond, 2021               | Y | P Y | N | Y   | Y | N | N   | N   | P Y | N  | Y     | Y     | Y  | Y  | N     | Y  |
| McBride                    | Y | N   | N | P Y | N | N | N   | Y   | N   | N  | N M C | N M C | N  | N  | N M C | Y  |
| Ding 2020                  | Y | N   | N | Y   | Y | N | N   | Y   | Y   | N  | Y     | Y     | Y  | Y  | Y     | Y  |
| Sultana 2021               | Y | Y   | N | N   | Y | Y | P Y | Y   | Y   | N  | Y     | Y     | Y  | Y  | Y     | Y  |
| Whelan 2021                | Y | N   | N | N   | Y | N | N   | Y   | N   | N  | N M C | N M C | N  | Y  | N M C | Y  |
| Faria 2021                 | Y | Y   | N | P Y | Y | Y | N   | Y   | Y   | N  | Y     | Y     | Y  | Y  | N     | Y  |
| Jackson 2021               | Y | Y   | N | P Y | Y | Y | N   | Y   | Y   | N  | Y     | Y     | Y  | Y  | N     | Y  |
| Badri 2021                 | Y | N   | N | N   | Y | N | N   | P Y | Y   | N  | Y     | Y     | Y  | Y  | Y     | Y  |
| Dugan 2021                 | Y | N   | N | P Y | N | N | N   | N   | P Y | N  | N M C | N M C | Y  | N  | N M C | Y  |
| Kabapy 2020                | Y | Y   | N | P Y | Y | Y | N   | N   | Y   | N  | Y     | Y     | Y  | Y  | Y     | Y  |
| Dong 2020                  | Y | N   | Y | N   | Y | Y | N   | N   | Y   | N  | Y     | N     | Y  | N  | N     | Y  |
| Najafizada,<br>2020        | N | N   | N | N   | N | N | N   | N   | N   | N  | N M C | N M C | N  | N  | N M C | Y  |

| Study ID<br>(Author, Year)    | 1 | 2   | 3 | 4   | 5 | 6 | 7 | 8   | 9 | 10 | 11    | 12    | 13 | 14 | 15    | 16 |
|-------------------------------|---|-----|---|-----|---|---|---|-----|---|----|-------|-------|----|----|-------|----|
| Nurollahpour<br>Shiadeh, 2020 | Y | N   | N | P Y | Y | Y | N | P Y | Y | N  | Y     | Y     | Y  | Y  | N     | Y  |
| Pega 2021                     | Y | P Y | N | P Y | Y | Y | N | Y   | Y | N  | Y     | Y     | Y  | Y  | N     | N  |
| Rostami 2021                  | Y | N   | N | P Y | Y | Y | N | P Y | Y | N  | Y     | Y     | Y  | Y  | Y     | Y  |
| Song, 2021                    | Y | N   | N | P Y | Y | Y | N | Y   | Y | N  | Y     | Y     | Y  | Y  | N     | Y  |
| Wu 2021                       | Y | Y   | Y | Y   | Y | Y | N | Y   | Y | N  | Y     | Y     | Y  | Y  | Y     | Y  |
| Okoli 2020                    | Y | N   | N | N   | Y | Y | N | P Y | Y | N  | Y     | Y     | Y  | Y  | Y     | Y  |
| Roller-Wirnsber<br>ger 2021   | Y | N   | Y | P Y | N | N | N | P Y | N | N  | N M C | N M C | N  | Y  | N M C | N  |

Key: Y=Yes; N=No, P Y = Partial yes and N M C = No meta-analysis conducted

AMSTAR 2 Items:

1. Did the research questions and inclusion criteria for the review include the components of PICO?
2. Did the report of the review contain an explicit statement that the review methods were established prior to the conduct of the review and did the report justify any significant deviations from the protocol?
3. Did the review authors explain their selection of the study designs for inclusion in the review?
4. Did the review authors use a comprehensive literature search strategy?
5. Did the review authors perform study selection in duplicate?
6. Did the review authors perform data extraction in duplicate?

1  
2  
3 7. Did the review authors provide a list of excluded studies and justify the exclusions?  
4

5 8. Did the review authors describe the included studies in adequate detail?  
6

7 9. Did the review authors use a satisfactory technique for assessing the risk of bias (RoB) in individual studies that were included in the review?"  
8

9 10. Did the review authors report on the sources of funding for the studies included in the review?  
10

11 11. If meta-analysis was performed did the review authors use appropriate methods for statistical combination of results?"  
12

13 12. If meta-analysis was performed, did the review authors assess the potential impact of RoB in individual studies on the results of the meta-analysis or  
14 other evidence synthesis?  
15

16 13. Did the review authors account for RoB in individual studies when interpreting/ discussing the results of the review?"  
17

18 14. Did the review authors provide a satisfactory explanation for, and discussion of, any heterogeneity observed in the results of the review?"  
19

20 15. If they performed quantitative synthesis did the review authors carry out an adequate investigation of publication bias (small study bias) and discuss its  
21 likely impact on the results of the review?"  
22

23 16. Did the review authors report any potential sources of conflict of interest, including any funding they received for conducting the review?"  
24  
25  
26  
27  
28  
29  
30  
31  
32  
33  
34  
35  
36  
37  
38  
39  
40  
41  
42  
43  
44  
45  
46





## PRISMA 2020 Checklist

| Section and Topic             | Item # | Checklist item                                                                                                                                                                                                                                                                                       | Location where item is reported      |
|-------------------------------|--------|------------------------------------------------------------------------------------------------------------------------------------------------------------------------------------------------------------------------------------------------------------------------------------------------------|--------------------------------------|
| <b>TITLE</b>                  |        |                                                                                                                                                                                                                                                                                                      |                                      |
| Title                         | 1      | Identify the report as a systematic review.                                                                                                                                                                                                                                                          | Page 1, Page 4                       |
| <b>ABSTRACT</b>               |        |                                                                                                                                                                                                                                                                                                      |                                      |
| Abstract                      | 2      | See the PRISMA 2020 for Abstracts checklist.                                                                                                                                                                                                                                                         | Page 2                               |
| <b>INTRODUCTION</b>           |        |                                                                                                                                                                                                                                                                                                      |                                      |
| Rationale                     | 3      | Describe the rationale for the review in the context of existing knowledge.                                                                                                                                                                                                                          | Page 4                               |
| Objectives                    | 4      | Provide an explicit statement of the objective(s) or question(s) the review addresses.                                                                                                                                                                                                               | Page 4                               |
| <b>METHODS</b>                |        |                                                                                                                                                                                                                                                                                                      |                                      |
| Eligibility criteria          | 5      | Specify the inclusion and exclusion criteria for the review and how studies were grouped for the syntheses.                                                                                                                                                                                          | Page 6, Table 1                      |
| Information sources           | 6      | Specify all databases, registers, websites, organisations, reference lists and other sources searched or consulted to identify studies. Specify the date when each source was last searched or consulted.                                                                                            | Page 5                               |
| Search strategy               | 7      | Present the full search strategies for all databases, registers and websites, including any filters and limits used.                                                                                                                                                                                 | Page 5<br>online supplemental file 1 |
| Selection process             | 8      | Specify the methods used to decide whether a study met the inclusion criteria of the review, including how many reviewers screened each record and each report retrieved, whether they worked independently, and if applicable, details of automation tools used in the process.                     | Page 5                               |
| Data collection process       | 9      | Specify the methods used to collect data from reports, including how many reviewers collected data from each report, whether they worked independently, any processes for obtaining or confirming data from study investigators, and if applicable, details of automation tools used in the process. | Page 6-7                             |
| Data items                    | 10a    | List and define all outcomes for which data were sought. Specify whether all results that were compatible with each outcome domain in each study were sought (e.g. for all measures, time points, analyses), and if not, the methods used to decide which results to collect.                        | Page 6-7                             |
|                               | 10b    | List and define all other variables for which data were sought (e.g. participant and intervention characteristics, funding sources). Describe any assumptions made about any missing or unclear information.                                                                                         | Page 6-7                             |
| Study risk of bias assessment | 11     | Specify the methods used to assess risk of bias in the included studies, including details of the tool(s) used, how many reviewers assessed each study and whether they worked independently, and if applicable, details of automation tools used in the process.                                    | Page 7                               |
| Effect measures               | 12     | Specify for each outcome the effect measure(s) (e.g. risk ratio, mean difference) used in the synthesis or presentation of results.                                                                                                                                                                  | Page 8 - 13                          |
| Synthesis methods             | 13a    | Describe the processes used to decide which studies were eligible for each synthesis (e.g. tabulating the study intervention characteristics and comparing against the planned groups for each synthesis (item #5)).                                                                                 | Page 7                               |
|                               | 13b    | Describe any methods required to prepare the data for presentation or synthesis, such as handling of missing summary statistics, or data conversions.                                                                                                                                                | Page 7                               |
|                               | 13c    | Describe any methods used to tabulate or visually display results of individual studies and syntheses.                                                                                                                                                                                               | Page 7                               |
|                               | 13d    | Describe any methods used to synthesize results and provide a rationale for the choice(s). If meta-analysis was performed, describe the model(s), method(s) to identify the presence and extent of statistical heterogeneity, and software package(s) used.                                          | Page 7                               |
|                               | 13e    | Describe any methods used to explore possible causes of heterogeneity among study results (e.g. subgroup analysis, meta-regression).                                                                                                                                                                 | N/A                                  |

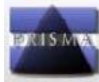

## PRISMA 2020 Checklist

| Section and Topic             | Item # | Checklist item                                                                                                                                                                                                                                                                       | Location where item is reported              |
|-------------------------------|--------|--------------------------------------------------------------------------------------------------------------------------------------------------------------------------------------------------------------------------------------------------------------------------------------|----------------------------------------------|
|                               | 13f    | Describe any sensitivity analyses conducted to assess robustness of the synthesized results.                                                                                                                                                                                         | N/A                                          |
| Reporting bias assessment     | 14     | Describe any methods used to assess risk of bias due to missing results in a synthesis (arising from reporting biases).                                                                                                                                                              | N/A                                          |
| Certainty assessment          | 15     | Describe any methods used to assess certainty (or confidence) in the body of evidence for an outcome.                                                                                                                                                                                | N/A                                          |
| <b>RESULTS</b>                |        |                                                                                                                                                                                                                                                                                      |                                              |
| Study selection               | 16a    | Describe the results of the search and selection process, from the number of records identified in the search to the number of studies included in the review, ideally using a flow diagram.                                                                                         | Page 7, Figure 1                             |
|                               | 16b    | Cite studies that might appear to meet the inclusion criteria, but which were excluded, and explain why they were excluded.                                                                                                                                                          | Page 7                                       |
| Study characteristics         | 17     | Cite each included study and present its characteristics.                                                                                                                                                                                                                            | online supplemental file 2 and 3, Page 7-13  |
| Risk of bias in studies       | 18     | Present assessments of risk of bias for each included study.                                                                                                                                                                                                                         | Page 8, Figure 3, online supplemental file 4 |
| Results of individual studies | 19     | For all outcomes, present, for each study: (a) summary statistics for each group (where appropriate) and (b) an effect estimate and its precision (e.g. confidence/credible interval), ideally using structured tables or plots.                                                     | Page 7-13, online supplemental file 2 and 3  |
| Results of syntheses          | 20a    | For each synthesis, briefly summarise the characteristics and risk of bias among contributing studies.                                                                                                                                                                               | Page 7-13                                    |
|                               | 20b    | Present results of all statistical syntheses conducted. If meta-analysis was done, present for each the summary estimate and its precision (e.g. confidence/credible interval) and measures of statistical heterogeneity. If comparing groups, describe the direction of the effect. | N/A                                          |
|                               | 20c    | Present results of all investigations of possible causes of heterogeneity among study results.                                                                                                                                                                                       | N/A                                          |
|                               | 20d    | Present results of all sensitivity analyses conducted to assess the robustness of the synthesized results.                                                                                                                                                                           | N/A                                          |
| Reporting biases              | 21     | Present assessments of risk of bias due to missing results (arising from reporting biases) for each synthesis assessed.                                                                                                                                                              | N/A                                          |
| Certainty of evidence         | 22     | Present assessments of certainty (or confidence) in the body of evidence for each outcome assessed.                                                                                                                                                                                  | N/A                                          |
| <b>DISCUSSION</b>             |        |                                                                                                                                                                                                                                                                                      |                                              |
| Discussion                    | 23a    | Provide a general interpretation of the results in the context of other evidence.                                                                                                                                                                                                    | Page 13-15                                   |
|                               | 23b    | Discuss any limitations of the evidence included in the review.                                                                                                                                                                                                                      | Page 14-15                                   |
|                               | 23c    | Discuss any limitations of the review processes used.                                                                                                                                                                                                                                | Page 14-15                                   |
|                               | 23d    | Discuss implications of the results for practice, policy, and future research.                                                                                                                                                                                                       | Page 13-15                                   |
| <b>OTHER INFORMATION</b>      |        |                                                                                                                                                                                                                                                                                      |                                              |
| Registration and              | 24a    | Provide registration information for the review, including register name and registration number, or state that the review was not registered.                                                                                                                                       | Page 5                                       |

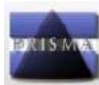

## PRISMA 2020 Checklist

| Section and Topic                              | Item # | Checklist item                                                                                                                                                                                                                             | Location where item is reported |
|------------------------------------------------|--------|--------------------------------------------------------------------------------------------------------------------------------------------------------------------------------------------------------------------------------------------|---------------------------------|
| protocol                                       | 24b    | Indicate where the review protocol can be accessed, or state that a protocol was not prepared.                                                                                                                                             | Page 5                          |
|                                                | 24c    | Describe and explain any amendments to information provided at registration or in the protocol.                                                                                                                                            | -                               |
| Support                                        | 25     | Describe sources of financial or non-financial support for the review, and the role of the funders or sponsors in the review.                                                                                                              | Page 16                         |
| Competing interests                            | 26     | Declare any competing interests of review authors.                                                                                                                                                                                         | Page 16                         |
| Availability of data, code and other materials | 27     | Report which of the following are publicly available and where they can be found: template data collection forms; data extracted from included studies; data used for all analyses; analytic code; any other materials used in the review. | Online supplemental files       |

From: Page MJ, McKenzie JE, Bossuyt PM, Boutron I, Hoffmann TC, Mulrow CD, et al. The PRISMA 2020 statement: an updated guideline for reporting systematic reviews. *BMJ* 2021;372:n71. doi: 10.1136/bmj.n71

For more information, visit: <http://www.prisma-statement.org/>
