# Supplementary material for: Health inequalities in infectious diseases: a systematic overview of reviews
Source: PubMed Central journal article supplement — BMJ Open. 2023 Apr 4;13(4):e067429. doi: 10.1136/bmjopen-2022-067429 (PMC10083762; doi:10.1136/bmjopen-2022-067429), 2023-04-04
Supplement: bmjopen-2022-067429supp001.pdf [file bmjopen-2022-067429supp001.pdf]

**Online supplemental file 1: SEARCH STRATEGY****Searched Ovid MEDLINE(R) ALL 1946 to November 23, 2021 on 24/11/2021**

Search terms for systematic reviews found at

<http://extranet.santecom.qc.ca/wiki/lbiblio3s/doku.php?id=concepts:revues-de-la-litterature-et-meta-analyses>

|    | Search                                      | Result |
|----|---------------------------------------------|--------|
| 1  | inequality.mp. or Socioeconomic Factors/    | 183584 |
| 2  | inequalities.mp.24364                       |        |
| 3  | protected characteristics.mp. 10            |        |
| 4  | inclusion health groups.mp. 3               |        |
| 5  | Homeless Persons/ or homeless.mp. 12922     |        |
| 6  | migrant\$.mp. or "Transients and Migrants"/ | 26370  |
| 7  | Sex Work/ or Sex Workers/ or sex work*.mp.  | 10781  |
| 8  | Gypsy roma.mp. 18                           |        |
| 9  | Human immunodeficiency virus/               | 21059  |
| 10 | acquired immune deficiency syndrome/ 77137  |        |
| 11 | infection/ 40269                            |        |
| 12 | tuberculosis/ 108757                        |        |
| 13 | parasitosis/ 0                              |        |
| 14 | hepatitis/ 22837                            |        |
| 15 | Vaccination/ 90391                          |        |
| 16 | Immunization/ 52361                         |        |
| 17 | Communicable Disease/31146                  |        |
| 18 | infectious disease.ti,ab,kw. 39865          |        |
| 19 | infection.ti,ab,kw. 1211775                 |        |
| 20 | tuberculosis.ti,ab,kw. 203159               |        |
| 21 | hiv.ti,ab,kw. 331192                        |        |
| 22 | aids.ti,ab,kw. 156336                       |        |
| 23 | hepatitis.ti,ab,kw. 228655                  |        |
| 24 | "immuni*".ti,ab,kw. 342218                  |        |
| 25 | "vaccin*".ti,ab,kw. 354100                  |        |
| 26 | Communicable disease.ti,ab,kw.4291          |        |

- 27 Parasitic disease.ti,ab,kw. 3780
- 28 infectious disease\$.mp. or Communicable Diseases/ 145081
- 29 (((systematic or state-of-the-art or scoping or literature or umbrella) adj (review\* or overview\* or assessment\*)) or "review\* of reviews" or meta-analy\* or metaanaly\* or ((systematic or evidence) adj1 assess\*) or "research evidence" or metasynthe\* or meta-synthe\*).tw. or exp Review Literature as Topic/ or exp Review/ or Meta-Analysis as Topic/ or Meta-Analysis/ or "systematic review"/ 3165549
- 30 1 or 2 or 3 or 4 or 5 or 6 or 7 or 8 240954
- 31 9 or 10 or 11 or 12 or 13 or 14 or 15 or 16 or 17 or 18 or 19 or 20 or 21 or 22 or 23 or 24 or 25 or 26 or 27 or 28 2364192
- 32 30 and 31 32588
- 33 29 and 32 2822
- 34 social class.mp. or social class/ 48149
- 35 poverty.mp. or poverty/ 65773
- 36 income.mp. or income/ 162454
- 37 educational status.mp. or educational status/ 58473
- 38 economic status.mp. or economic status/ 15731
- 39 travellers.mp. 4716
- 40 rough sleeping.mp. 23
- 41 homelessness/ 8802
- 42 30 or 34 or 35 or 36 or 37 or 38 or 39 or 40 or 41 476015
- 43 sexually transmitted disease/ or STI.mp. 32214
- 44 AMR.mp. 5408
- 45 antimicrobial resistance.mp. or antibiotic resistance/ 85277
- 46 anti-microbial resistance.mp. 196
- 47 31 or 43 or 44 or 45 or 46 2444675
- 48 42 and 47 62612
- 49 29 and 48 8144
- 50 limit 49 to yr="2000 -Current" 7318

**Embase Classic+Embase 1947 to 2021 November 23 searched on 24/11/2021**

| Searches                                      | Results |
|-----------------------------------------------|---------|
| 1 inequality.mp. or Socioeconomic Factors/    | 159438  |
| 2 inequalities.mp.26580                       |         |
| 3 protected characteristics.mp. 18            |         |
| 4 inclusion health groups.mp. 3               |         |
| 5 Homeless Persons/ or homeless.mp. 12270     |         |
| 6 migrant\$.mp. or "Transients and Migrants"/ | 59556   |
| 7 Sex Work/ or Sex Workers/ or sex work*.mp.  | 14114   |
| 8 Gypsy roma.mp. 22                           |         |
| 9 Human immunodeficiency virus/               | 125500  |
| 10 acquired immune deficiency syndrome/       | 136979  |
| 11 infection/ 402825                          |         |
| 12 tuberculosis/ 162052                       |         |
| 13 parasitosis/ 24410                         |         |
| 14 hepatitis/ 67370                           |         |
| 15 Vaccination/ 179733                        |         |
| 16 Immunization/ 117275                       |         |
| 17 Communicable Disease/34287                 |         |
| 18 infectious disease.ti,ab,kw. 50469         |         |
| 19 infection.ti,ab,kw. 1631799                |         |
| 20 tuberculosis.ti,ab,kw. 245043              |         |
| 21 hiv.ti,ab,kw. 426227                       |         |
| 22 aids.ti,ab,kw. 190986                      |         |
| 23 hepatitis.ti,ab,kw. 334114                 |         |
| 24 "immuni*".ti,ab,kw. 440252                 |         |
| 25 "vaccin*".ti,ab,kw. 438145                 |         |
| 26 Communicable disease.ti,ab,kw.5111         |         |
| 27 Parasitic disease.ti,ab,kw. 4822           |         |

28 infectious disease\$.mp. or Communicable Diseases/ 150812

29 1 or 2 or 3 or 4 or 5 or 6 or 7 or 8 254578

30 9 or 10 or 11 or 12 or 13 or 14 or 15 or 16 or 17 or 18 or 19 or 20 or 21 or 22 or 23 or 24 or 25 or 26 or 27 or 28 3242281

31 29 and 30 37750

32 (((systematic or state-of-the-art or scoping or literature or umbrella) adj (review\* or overview\* or assessment\*)) or "review\* of reviews" or meta-analy\* or metaanaly\* or ((systematic or evidence) adj1 assess\*) or "research evidence" or metasynthe\* or meta-synthe\*).tw. or systematic review/ or "systematic review (topic)"/ or meta analysis/ or "meta analysis (topic)"/ 713296

33 31 and 32 1343

34 social class.mp. or social class/ 40328

35 poverty.mp. or poverty/ 64722

36 income.mp. or income/ 221004

37 educational status.mp. or educational status/ 90042

38 economic status.mp. or economic status/ 23383

39 travellers.mp. 6111

40 rough sleeping.mp. 30

41 homelessness/ 12187

42 29 or 34 or 35 or 36 or 37 or 38 or 39 or 40 or 41 588825

43 sexually transmitted disease/ or STI.mp. 62753

44 AMR.mp. 9242

45 antimicrobial resistance.mp. or antibiotic resistance/ 188533

46 anti-microbial resistance.mp. 289

47 30 or 43 or 44 or 45 or 46 3400990

48 32 and 42 and 47 4243

49 limit 48 to yr="2000 -Current" 4212

**Searched Web of Science on 24/11/2021 (Web of Science Core Collection)**

*Inequalities related terms searched in topics and combined with title search for infectious diseases. This makes the search capture inequality related articles where inequalities are not necessarily mentioned in the title. Had to limit the infectious diseases to titles in order to focus on relevant papers.*

|    |                                                                                                                                                                                                                                                                                                                                                                                                                                           |        |
|----|-------------------------------------------------------------------------------------------------------------------------------------------------------------------------------------------------------------------------------------------------------------------------------------------------------------------------------------------------------------------------------------------------------------------------------------------|--------|
| #1 | (inequalities OR inequality OR "Socioeconomic Factor" OR "protected characteristics" OR inclusion health groups OR "Homeless Person*" OR homelessness OR Transients OR Migrant* OR "Sex Work*" OR "Gypsy roma" OR "rough sleeping" OR traveller* OR "traveller community" OR "traveller communities" OR "economic status" OR "educational status" OR income OR poverty OR "social class") (Topic) and Review (Document Type)              | 53,359 |
| #2 | ("Human immunodeficiency virus" OR HIV OR "acquired immune deficiency syndrome" OR AIDS OR infection OR tuberculosis OR parasitosis OR hepatitis OR vaccination OR immunization OR "communicable disease*" OR "infectious disease*" OR "parasitic disease*" OR "sexually transmitted diseases*" OR STI OR AMR OR "antimicrobial resistance" OR "anti-microbial resistance" OR "antibiotic resistance") (Title) and Review (Document Type) | 64,026 |
| #3 | #1 AND #2<br>Timespan: 2000-01-01 to 2021-11-24 (Publication Date)                                                                                                                                                                                                                                                                                                                                                                        | 3,038  |

**Searched Opengrey on 24112021**

(inequalities OR inequality OR "Socioeconomic Factor" OR "protected characteristics" OR inclusion health groups OR "Homeless Person\*" OR homelessness OR Transients OR Migrant\* OR "Sex Work\*" OR "Gypsy roma" OR "rough sleeping" OR traveller\* OR "traveller community" OR "traveller communities" OR "economic status" OR "educational status" OR income OR poverty OR "social class") AND ("Human immunodeficiency virus" OR HIV OR "acquired immune deficiency syndrome" OR AIDS OR infection OR tuberculosis OR parasitosis OR hepatitis OR vaccination OR immunization OR "communicable disease\*" OR "infectious disease\*" OR "parasitic disease\*" OR "sexually transmitted diseases\*" OR STI OR AMR OR "antimicrobial resistance" OR "anti-microbial resistance" OR "antibiotic resistance")

**145** articles retrieved with the search
