# Supplementary material for: Health inequalities in infectious diseases: a systematic overview of reviews
Source: PubMed Central journal article supplement — BMJ Open. 2023 Apr 4;13(4):e067429. doi: 10.1136/bmjopen-2022-067429 (PMC10083762; doi:10.1136/bmjopen-2022-067429), 2023-04-04
Supplement: bmjopen-2022-067429supp002.pdf [file bmjopen-2022-067429supp002.pdf]

## Online supplementary file 2: Characteristics of Included Reviews

| Study ID<br>(Author, Year)      | Corresponding<br>Author's Country | Infectious diseases                                       | Search period    | Includes<br>meta-<br>analysis<br>(Yes/No) | Number of studies<br>included ( <i>Number of<br/>UK studies</i> ) | Publication<br>year range for<br>included<br>studies | Protected<br>characteristics | Socioeconomic<br>inequalities | Inclusion<br>health<br>groups |
|---------------------------------|-----------------------------------|-----------------------------------------------------------|------------------|-------------------------------------------|-------------------------------------------------------------------|------------------------------------------------------|------------------------------|-------------------------------|-------------------------------|
| Abraha, 2018 <sup>58</sup>      | Switzerland                       | AMR-Gonorrhoea                                            | 1946-2017        | No                                        | 24 (unclear)                                                      | 1989-2017                                            | ✓                            | ✓                             |                               |
| Adams, 2018 <sup>75</sup>       | UK                                | Gastrointestinal Infection                                | 1980 - 2015      | Yes                                       | 77 (unclear)                                                      | 1995-2015                                            | ✓                            | ✓                             |                               |
| Aldridge, 2018 <sup>46</sup>    | UK                                | Not specified                                             | 2005- 2015       | Yes                                       | 337 (unclear)                                                     | not reported                                         | ✓                            |                               | ✓                             |
| Alividza, 2018 <sup>47</sup>    | UK                                | AMR                                                       | no date limit    | No                                        | 19 (at least 2)                                                   | 1998 to 2015                                         |                              | ✓                             |                               |
| Arat, 2019 <sup>116</sup>       | Sweden                            | Vaccination                                               | not reported     | No                                        | 15 (2)                                                            | 2007-2017                                            |                              | ✓                             |                               |
| Arum, 2021 <sup>50</sup>        | UK                                | HIV, HCV                                                  | 2000 - 2017      | Yes                                       | 37 (6)                                                            | 2000 – 2019                                          |                              |                               | ✓                             |
| Badri, 2021 <sup>93</sup>       | Iran                              | Ocular toxocariasis                                       | 1966 - 2019      | Yes                                       | 101 (4)                                                           | 1966 - 2020                                          | ✓                            |                               |                               |
| Behera, 2018 <sup>76</sup>      | India                             | HIV                                                       | Not reported     | No                                        | Not reported                                                      | 1989 - 2017                                          | ✓                            |                               |                               |
| Beijer, 2012 <sup>48</sup>      | UK                                | TB, HCV virus, and HIV                                    | 1980 - 2012      | Yes                                       | 43 (4)                                                            | 1984 - 2011                                          | ✓                            | ✓                             | ✓                             |
| Bocquier 2017 <sup>118</sup>    | France                            | Vaccination                                               | 2000 - 2016      | No                                        | 43 (5)                                                            | Not reported                                         |                              | ✓                             |                               |
| Bonten, 2020 <sup>77</sup>      | Netherlands                       | <i>Escherichia coli bacteraemia</i>                       | 2007- 2018       | Yes                                       | 210 (21)                                                          | 2007-2018                                            | ✓                            |                               |                               |
| Chan, 2017 <sup>18</sup>        | Australia                         | TB                                                        | Inception- 2017  | Yes                                       | 20 (1)                                                            | 1990-2015                                            |                              |                               | ✓                             |
| Chen, 2019 <sup>70</sup>        | China                             | HIV disease                                               | unclear - 2019   | Yes                                       | 101 (1)                                                           | 1984-2017                                            | ✓                            |                               |                               |
| Chernet, 2017 <sup>14</sup>     | Switzerland                       | Six selected infectious diseases                          | not reported     | Yes                                       | 96 (unclear)                                                      | 2000-2017                                            |                              |                               | ✓                             |
| Coffey, 2018 <sup>113</sup>     | Australia                         | Group A Streptococcal infection,<br>acute rheumatic fever | Unclear - 2016   | No                                        | 91 (unclear)                                                      | 1944 - 2016                                          |                              | ✓                             |                               |
| Colledge, 2020 <sup>74</sup>    | Australia                         | HCV                                                       | not reported     | No                                        | 223 (16)                                                          | 2008 -2017                                           | ✓                            | ✓                             |                               |
| Cormier, 2019 <sup>44</sup>     | Canada                            | TB/HIV                                                    | 1980 - 2017.     | No                                        | 475 (0)                                                           | 1984-2017                                            | ✓                            | ✓                             | ✓                             |
| Crichton, 2015 <sup>78</sup>    | UK                                | Genital chlamydia infection                               | Inception - 2014 | Yes                                       | 36 (3)                                                            | not reported                                         | ✓                            | ✓                             |                               |
| De Vito, 2017 <sup>19</sup>     | Denmark                           | Vaccination                                               | 2007- 2017       | No                                        | 35 +21 (4)                                                        | not reported                                         |                              | ✓                             | ✓                             |
| Denning, 2018 <sup>79</sup>     | UK                                | Vulvovaginal candidiasis                                  | 1985 - 2016      | Yes                                       | 8 (2)                                                             | 2000-2013                                            | ✓                            |                               |                               |
| Di Gennaro, 2017 <sup>120</sup> | Mozambique                        | TB - MDR                                                  | Inception - 2016 | Yes                                       | 50 (1)                                                            | 1997 - 2016                                          |                              | ✓                             |                               |
| Ding, 2020 <sup>114</sup>       | China                             | HBV                                                       | Inception - 2020 | Yes                                       | 10 (0)                                                            | 1995 - 2019                                          |                              | ✓                             |                               |
| Dong, 2020 <sup>94</sup>        | China                             | Cryptosporidium Infection                                 | 1960 - 2018      | Yes                                       | 221 (unclear)                                                     | Unclear                                              | ✓                            | ✓                             |                               |
| Dugan, 2021 <sup>95</sup>       | USA                               | HCV                                                       | 2000 - 2018      | No                                        | 41 (unclear)                                                      | Unclear                                              | ✓                            |                               |                               |
| Eilami, 2019 <sup>104</sup>     | Iran                              | HIV/AIDS                                                  | 2010 - 2017      | Yes                                       | 54 (unclear)                                                      | 2010-2017                                            | ✓                            |                               |                               |
| Fakoya, 2015 <sup>71</sup>      | UK                                | HIV                                                       | 2002- 2014       | No                                        | 27 (9)                                                            | 2003-2014                                            | ✓                            |                               |                               |
| Falagas, 2008 <sup>59</sup>     | Greece                            | Vaccination                                               | Not reported     | No                                        | 39 (1)                                                            | 1979-2005                                            | ✓                            | ✓                             |                               |
| Falla, 2018 <sup>20</sup>       | Netherlands                       | Chronic HCV                                               | 2000-2015        | No                                        | Part 1: 18 (unclear)<br>Part 2: 56 (1)                            |                                                      |                              |                               | ✓                             |
| Faria, 2021 <sup>96</sup>       | Brazil                            | Vaccination                                               | Inception-2020   | Yes                                       | 31 (0)                                                            | 2001 -2020                                           | ✓                            | ✓                             |                               |
| Fauroux, 2017 <sup>105</sup>    | Spain                             | Respiratory Syncytial Virus                               | 1995 - 2015      | No                                        | 74 (8)                                                            | Unclear                                              | ✓                            | ✓                             |                               |
| Faustini, 2005 <sup>21</sup>    | Italy                             | TB (MDR)                                                  | 1993-2003        | Yes                                       | 29 (3)                                                            | 1995-2005                                            | ✓                            |                               | ✓                             |
| Fernández, 2015 <sup>60</sup>   | Denmark                           | Vaccination: HPV                                          | not reported     | No                                        | 23(8)                                                             | 2008-2014                                            | ✓                            | ✓                             |                               |
| Fisher, 2013 <sup>61</sup>      | UK                                | Vaccination: HPV                                          | Inception- 2012  | Yes                                       | 27(1)                                                             | 2008-2012                                            | ✓                            | ✓                             |                               |
| Forshaw, 2017 <sup>117</sup>    | UK                                | Vaccination                                               | 1990 - 2016      | Yes                                       | 37(0)                                                             | 1990- 2015                                           | ✓                            | ✓                             |                               |
| Foumet, 2018 <sup>8</sup>       | Netherlands                       | Vaccination                                               | 1950- 2013       | No                                        | 48/15 (at least 1)                                                | not reported                                         | ✓                            |                               | ✓                             |
| Ghiasvand, 2020 <sup>80</sup>   | Iran                              | HIV/AIDS                                                  | Inception - 2017 | Yes                                       | 19 (0)                                                            | 2005 - 2017                                          | ✓                            | ✓                             |                               |
| Gorjana, 2017 <sup>62</sup>     | Australia                         | HPV Vaccination                                           | Unclear - 2015   | No                                        | 18 (1)                                                            | 2010 - 2015                                          | ✓                            |                               |                               |

| Study ID (Author, Year)                    | Corresponding Author's Country | Infectious diseases           | Search period    | Includes meta-analysis (Yes/No) | Number of studies included (Number of UK studies) | Publication year range for included studies | Protected characteristics | Socioeconomic inequalities | Inclusion health groups |
|--------------------------------------------|--------------------------------|-------------------------------|------------------|---------------------------------|---------------------------------------------------|---------------------------------------------|---------------------------|----------------------------|-------------------------|
| Greenaway, 2015 <sup>22</sup>              | Canada                         | HCV                           | not reported     | Yes                             | 50(0)                                             | 1990-2013                                   | ✓                         | ✓                          | ✓                       |
| Hahne, 2013 <sup>24</sup>                  | The Netherlands                | HBV and HCV                   | 2000 - 2009      | No                              | 124 (9)                                           | Unclear                                     | ✓                         |                            | ✓                       |
| Hermann, 2019 <sup>81</sup>                | Canada                         | Vaccination                   | 2000- 2017       | No                              | 33 (15)                                           | 2001-2016                                   | ✓                         |                            |                         |
| Jackson, 2021 <sup>38</sup>                | Ireland                        | Tuberculosis and MDR-TB       | Unclear - 2020   | Yes                             | 32 (3)                                            | 2010 - 2018                                 |                           |                            | ✓                       |
| Jain, 2017 <sup>25</sup>                   | UK                             | Vaccination                   | not reported     | Yes                             | 35 (5)                                            | 1997 and 2015                               | ✓                         | ✓                          | ✓                       |
| Jin, 2020 <sup>72</sup>                    | Australia                      | HCV                           | 2000 - 2019      | Yes                             | 194 (at least 14)                                 | Unclear                                     |                           |                            | ✓                       |
| Kabapy, 2020 <sup>39</sup>                 | Egypt                          | HIV                           | 1982 - 2018      | Yes                             | 231 (unclear)                                     | Unclear                                     | ✓                         | ✓                          | ✓                       |
| Kawatsu, 2014 <sup>26</sup>                | Japan                          | TB                            | Not reported     | No                              | 18 (1)                                            | 1997 - 2012                                 | ✓                         | ✓                          | ✓                       |
| Kentikelenis, 2015 <sup>27</sup>           | UK                             | Various                       | 2007 - 2014      | No                              | 21 (unclear)                                      | not reported                                |                           | ✓                          | ✓                       |
| Lafond, 2021 <sup>97</sup>                 | USA                            | Influenza-associated lower    | 1996 –2016       | Yes                             | 75 (Unclear)                                      | 1996 - 2016                                 | ✓                         |                            |                         |
| Larson, 2014 <sup>115</sup>                | UK                             | Vaccination                   | unclear - 2012   | No                              | 1164 (at least one)                               | 2007–2012                                   |                           | ✓                          |                         |
| Leumi, 2020 <sup>56</sup>                  | Cameroon                       | Hepatitis B                   | 1990 - 2017      | Yes                             | 358 (unclear)                                     | Unclear                                     | ✓                         |                            | ✓                       |
| Leung, 2019 <sup>106</sup>                 | Australia                      | HIV, HBV, HCV                 | 2008 - 2017      | Yes                             | 104(unclear)                                      | not reported                                | ✓                         |                            |                         |
| Li, P. 2020 <sup>82</sup>                  | Netherlands                    | HEV                           | inception - 2019 | Yes                             | 419(7)                                            | not reported                                | ✓                         | ✓                          |                         |
| Lindsay, 2015 <sup>83</sup>                | Belgium                        | Norovirus disease             | 2003 - 2013      | No                              | 39 (4)                                            | not reported                                | ✓                         |                            |                         |
| Lucyk, 2019 <sup>119</sup>                 | Canada                         | Vaccination- Influenza        | 2012 - 2017      | No                              | 42 (1)                                            | 2012- 2017                                  |                           | ✓                          |                         |
| Ly, 2021 <sup>51</sup>                     | France                         | Various                       | 1980 - 2020      | No                              | 81 (4)                                            | Unclear                                     | ✓                         | ✓                          | ✓                       |
| Macina, 2021 <sup>98</sup>                 | France                         | Bordetella pertussis          | 1990 - 2019      | No                              | 88 (7)                                            | Unclear                                     | ✓                         |                            |                         |
| Malerba, 2015 <sup>63</sup>                | Italy                          | Vaccination                   | 2000 - 2014      | No                              | 11 (1)                                            | 2003-2014                                   | ✓                         | ✓                          |                         |
| McBride, 2021 <sup>40</sup>                | Canada                         | HIV/STI                       | 2009 - 2019      | No                              | 29 (unclear)                                      | Not reported                                | ✓                         |                            | ✓                       |
| Millett, 2012 <sup>64</sup>                | USA                            | HIV disease                   | 1981 - 2011      | Yes                             | 194 (13)                                          | 1981-2011                                   | ✓                         | ✓                          |                         |
| Mipatrini, 2017 <sup>28</sup>              | Italy                          | Vaccination                   | 2005-2016        | No                              | 58 (7)                                            | not reported                                |                           |                            | ✓                       |
| Mirzadeh, 2021 <sup>99</sup>               | Iran                           | Trichomonas vaginalis         | 1985 - 2020.     | Yes                             | 85 (2)                                            | 1985 - 2020                                 | ✓                         |                            |                         |
| Morais, 2017 <sup>29</sup>                 | Portugal                       | <i>Helicobacter pylori</i>    | inception - 2015 | No                              | 28 (unclear)                                      | 1988-2014                                   |                           |                            | ✓                       |
| Nagata, 2013 <sup>65</sup>                 | Switzerland                    | vaccination- Influenza        | 1980 - 2011      | No                              | 80 (7)                                            | not reported                                | ✓                         | ✓                          |                         |
| Najafizada, 2020 <sup>121</sup>            | Canada                         | MDR-TB                        | 1998-2018        | No                              | 15(4)                                             | Not reported                                |                           | ✓                          |                         |
| Nava-Aguilera, 2009 <sup>49</sup>          | Mexico                         | TB                            | unclear - 2005   | Yes                             | 30 (1)                                            | 1994 - 2008                                 | ✓                         | ✓                          | ✓                       |
| Nellums, 2018 <sup>42</sup>                | UK                             | AMR                           | 2000- 2017       | Yes                             | 23 (0)                                            | 2006-2016                                   |                           |                            | ✓                       |
| Newman, 2015 <sup>111</sup>                | USA                            | Foodborne infectious diseases | 1980 - 2013      | No                              | 16 (3)                                            | not reported                                | ✓                         | ✓                          |                         |
| Nourollahpour Shiadeh, 2020 <sup>110</sup> | Iran                           | Toxoplasmosis                 | Inception -2020  | Yes                             | 14 (0)                                            | 2001- 2019                                  | ✓                         |                            |                         |
| Offer, 2015 <sup>66</sup>                  | UK                             | TB                            | 1990 - unclear   | No                              | 18 (18)                                           | 1999-2013                                   | ✓                         | ✓                          |                         |
| Okoli, 2020 <sup>30</sup>                  | Canada                         | Influenza vaccination         | Unclear - 2020   | Yes                             | 34 (1)                                            | 2004 - 2019                                 | ✓                         | ✓                          | ✓                       |
| Okoli, 2021 <sup>69</sup>                  | Canada                         | Influenza vaccination         | 2000 - 2020      | Yes                             | 36 (2)                                            | 2010-2020                                   | ✓                         | ✓                          |                         |
| Oldenburg, 2014 <sup>73</sup>              | USA                            | HIV                           | 2004 - 2013      | Yes                             | 88 (1)                                            | not reported                                | ✓                         |                            | ✓                       |
| Oldenburg, 2015 <sup>52</sup>              | USA                            | HIV                           | 2004 - 2013,     | Yes                             | 33 (0)                                            | 2004-2013                                   |                           |                            | ✓                       |
| Operario, 2008 <sup>53</sup>               | UK                             | HIV                           | 1980 -2007       | Yes                             | 25 (0)                                            | 1988- 2006.                                 | ✓                         |                            | ✓                       |
| Pega 2021 <sup>41</sup>                    | Switzerland,                   | HIV                           | 2010- 2020       | Yes                             | 19(1)                                             | 2010-2019                                   |                           |                            | ✓                       |

| Study ID (Author, Year)                 | Corresponding Author's Country | Infectious diseases        | Search period    | Includes meta-analysis (Yes/No) | Number of studies included (Number of UK studies) | Publication year range for included studies | Protected characteristics | Socioeconomic inequalities | Inclusion health groups |
|-----------------------------------------|--------------------------------|----------------------------|------------------|---------------------------------|---------------------------------------------------|---------------------------------------------|---------------------------|----------------------------|-------------------------|
| Platt, 2013a <sup>31</sup>              | UK                             | HIV, STIs                  | Not reported     | No                              | 26 (1)                                            | Not reported                                |                           |                            | ✓                       |
| Platt, 2013b <sup>32</sup>              | UK                             | HIV, STIs                  | 2005 - 2011      | No                              | 73 (5)                                            | Not reported                                |                           |                            | ✓                       |
| Possenti, 2016 <sup>84</sup>            | Italy                          | Cystic Echinococcosis      | not reported     | Yes                             | 37(0)                                             | 1964-2014                                   | ✓                         | ✓                          |                         |
| Prost, 2007 <sup>33</sup>               | UK                             | HIV                        | Unknown - 2005   | No                              | 138 (unclear)                                     | 1996 -2005                                  | ✓                         |                            | ✓                       |
| Pulver, 2016 <sup>107</sup>             | Canada                         | Vaccination                | 1980 - 2014      | No                              | 12 (1)                                            | 1993 - 2013                                 | ✓                         |                            | ✓                       |
| Richterman, 2018 <sup>85</sup>          | USA                            | Cholera                    | not reported     | Yes                             | 110 (0)                                           | 1974-2017                                   | ✓                         | ✓                          |                         |
| Rodrigo, 2010 <sup>112</sup>            | Sri Lanka                      | HIV                        | 1999 -2009       | No                              | 98 (unclear)                                      | not reported                                |                           | ✓                          |                         |
| Roller-Wirnsberger, 2021 <sup>100</sup> | Austria                        | Influenza vaccination      | 2012- 2019       | No                              | 44 (at least 1)                                   | 2012-2018                                   | ✓                         | ✓                          |                         |
| Rossi, 2012 <sup>34</sup>               | Canada                         | HBV                        | Inception - 2011 | Yes                             | 110 (2)                                           | 1977 - 2011                                 |                           |                            | ✓                       |
| Rostami, 2019a <sup>87</sup>            | Iran                           | Toxocariasis               | 1980 - 2019      | Yes                             | 250 (2)                                           | 1980 -2019                                  | ✓                         | ✓                          |                         |
| Rostami, 2019b <sup>86</sup>            | Iran                           | Acute Toxoplasma infection | 1988 - 2018      | Yes                             | 217 (3)                                           | 1988 - 2018                                 | ✓                         |                            |                         |
| Rostami, 2021 <sup>101</sup>            | Iran                           | Toxoplasmosis              | 1980-2020        | Yes                             | 150 (2)                                           | 1987-2020                                   | ✓                         | ✓                          |                         |
| Salgado-Barreira, 2014 <sup>122</sup>   | Spain                          | HIV                        | unclear -2012    | No                              | 24 (1)                                            | 1983- 2010                                  |                           | ✓                          |                         |
| Sandgren, 2014 <sup>23</sup>            | Sweden                         | TB                         | 1990- 2012       | Yes                             | 15 (1)                                            | not reported                                |                           |                            | ✓                       |
| Schepisi, 2018 <sup>88</sup>            | Italy                          | TB                         | unclear - 2017   | Yes                             | 74 (13)                                           | 1950-2017                                   | ✓                         |                            |                         |
| Schierhout, 2020 <sup>89</sup>          | Australia                      | HTLV-1                     | 1910 - 2018      | Yes                             | 39 (0)                                            | 1991 - 2018                                 | ✓                         |                            |                         |
| Song, 2021 <sup>102</sup>               | China                          | Drug resistant TB (MDR-TB) | 2000-2020        | Yes                             | 37 (2 at least)                                   | 2000-2019                                   | ✓                         |                            |                         |
| Spyromitrou-Xioufi, 2020 <sup>90</sup>  | Greece                         | Meningococcal Infection    | 2008 - 2018      | Yes                             | 6 (0)                                             | 1999-2017                                   | ✓                         | ✓                          |                         |
| Stockdale, 2020 <sup>54</sup>           | UK                             | HDV                        | 1998 - 2019      | Yes                             | 282 (at least 1)                                  | not reported                                |                           |                            | ✓                       |
| Striffler, 2015 <sup>91</sup>           | Canada                         | Meningococcal Infection    | inception - 2013 | No                              | 17 (6)                                            | 1982-2012                                   | ✓                         |                            |                         |
| Suhrcke, 2011 <sup>35</sup>             | UK                             | Various                    | 1947 - 2010      | No                              | 37 (2)                                            | not reported                                |                           | ✓                          | ✓                       |
| Sultana, 2021 <sup>103</sup>            | Bangladesh                     | HIV and MDR-TB             | 2010 - 2020      | Yes                             | 54 (0)                                            | 2010 - 2020                                 | ✓                         |                            |                         |
| Tabacchi, 2016 <sup>67</sup>            | Italy                          | Vaccination- MMR           | not reported     | Yes                             | 45 (19)                                           | 2000-2014                                   | ✓                         | ✓                          |                         |
| Tauli, 2016 <sup>36</sup>               | Brazil                         | Vaccination                | 1992- 2014       | No                              | 23(0)                                             | not reported                                | ✓                         | ✓                          | ✓                       |
| Tavares, 2017 <sup>37</sup>             | Portugal                       | HIV-TB                     | 2000 - 2016      | No                              | 27 (2)                                            | 2003 - 2016                                 |                           |                            | ✓                       |
| Tollefson, 2013 <sup>45</sup>           | USA                            | TB                         | 1990 – 2011      | No                              | 91 (0)                                            | 1990 - 2012                                 |                           |                            | ✓                       |
| Van Gerwen, 2020 <sup>108</sup>         | USA                            | STI/HIV                    | 1968 - 2018      | Yes                             | 25 (0)                                            | not reported                                | ✓                         |                            |                         |
| Vet, 2015 <sup>55</sup>                 | The Netherlands                | Vaccination                | Inception-2014   | No                              | 18 (0)                                            | not reported                                | ✓                         | ✓                          | ✓                       |
| Vukovic,2019 <sup>123</sup>             | Italy                          | Influenza vaccination      | Unknown - 2017   | No                              | 12 (6)                                            | 2004 - 2017                                 |                           | ✓                          |                         |
| Wayal, 2018 <sup>68</sup>               | UK                             | STI                        | Unclear - 2016   | No                              | 15 (15)                                           | 2000 - 2017                                 | ✓                         |                            |                         |
| Whelan, 2021 <sup>109</sup>             | The Netherlands                | Gonorrhoea                 | 2010 - 2019      | No                              | 174 (1)                                           | Unclear                                     | ✓                         |                            |                         |
| Wu, 2021 <sup>57</sup>                  | China                          | HPV                        | 1990-2019        | Yes                             | 107 (0)                                           | 1989-2019                                   | ✓                         |                            | ✓                       |
| Yu, 2020 <sup>43</sup>                  | USA                            | HIV/STI                    | Unclear - 2019   | No                              | 21 (0)                                            | 2008 -2017                                  |                           |                            | ✓                       |
| Zamani, 2018 <sup>92</sup>              | Iran                           | <i>Helicobacter pylori</i> | 2000 - 2017      | Yes                             | 183 (2)                                           | not reported                                | ✓                         |                            |                         |
