# Supplementary material for: Health inequalities in infectious diseases: a systematic overview of reviews
Source: PubMed Central journal article supplement — BMJ Open. 2023 Apr 4;13(4):e067429. doi: 10.1136/bmjopen-2022-067429 (PMC10083762; doi:10.1136/bmjopen-2022-067429), 2023-04-04
Supplement: bmjopen-2022-067429supp003.pdf [file bmjopen-2022-067429supp003.pdf]

## Online supplemental file 3: EVIDENCE MATRIX

| Dimension of inequalities | Variables | Infectious diseases: Author, year (number of UK studies included) |                                                                    |                                                                               |                                                                     |                                                                                                                                                                                                                                                                                                             |                                                                                                          |                                                                                                                                                                                                                                                                                                                                                                                                                                                |
|---------------------------|-----------|-------------------------------------------------------------------|--------------------------------------------------------------------|-------------------------------------------------------------------------------|---------------------------------------------------------------------|-------------------------------------------------------------------------------------------------------------------------------------------------------------------------------------------------------------------------------------------------------------------------------------------------------------|----------------------------------------------------------------------------------------------------------|------------------------------------------------------------------------------------------------------------------------------------------------------------------------------------------------------------------------------------------------------------------------------------------------------------------------------------------------------------------------------------------------------------------------------------------------|
|                           |           | Tuberculosis                                                      | HIV                                                                | STI                                                                           | Hepatitis C                                                         | immunisation                                                                                                                                                                                                                                                                                                | AMR/multi-drug resistance                                                                                | Other infectious diseases                                                                                                                                                                                                                                                                                                                                                                                                                      |
| Protected characteristics | Age       | Nava-Aguilera, 2009 (1)<br>Schepisi, 2018 (13)                    | Ghiasvand, 2020 (0)<br>Behera, 2018 (unclear)<br>Sultana, 2021 (0) | Crichton, 2015 (3)<br>Denning, 2018 (2)<br>Wu, 2021 (0)<br>Mirzadeh, 2021 (2) | Colledge, 2020 (16)<br>Greenaway, 2015 (0)<br>Dugan, 2021 (unclear) | Vet, 2015 (0)<br>Okoli, 2020 (1)<br>Gorjana, 2017 (1)<br>Fernández, 2015 (8)<br>Tabacchi, 2016 (19)<br>Nagata, 2013 (unclear, at least 1)<br>Falagas, 2008 (1)<br>Hermann, 2019 (15)<br>Tauli, 2016 (0)<br>Malerba, 2015 (1)<br>Okoli, 2021 (2)<br>Roller-Wirnsberger, 2021 (at least 1)<br>Faria, 2021 (0) | Abraha, 2018 (unclear, at least 1)<br>Faustini, 2005 (3)<br>Song, 2021 (at least 2)<br>Sultana, 2021 (0) | Leumi, 2020 (unclear)<br>Macina, 2021 (7)<br>Lafond, 2021 (unclear)<br>Dong, 2020 (unclear)<br>Bonten, 2020 (21)<br>Ly, 2021 (4)<br>Li, 2020 (7)<br>Rostami, 2019a (2)<br>Rostami, 2019b (3)<br>Rostami, 2021 (2)<br>Badri, 2021 (4)<br>Schierhout, 2020 (0)<br>Adams, 2018 (unclear, at least 1)<br>Zamani, 2018 (2)<br>Lindsay, 2015 (4)<br>Possenti, 2016 (0)<br>Richterman, 2018 (0)<br>Strifler, 2015 (6)<br>Spyromitrou-Xioufi, 2020 (0) |

| Dimension of inequalities | Variables                      | Infectious diseases: Author, year (number of UK studies included) |                                                                                                                                                                  |                                                                                           |                                                                  |                                                                                                                                           |                                                          |                                                                                                                                                                                                                                                                                        |
|---------------------------|--------------------------------|-------------------------------------------------------------------|------------------------------------------------------------------------------------------------------------------------------------------------------------------|-------------------------------------------------------------------------------------------|------------------------------------------------------------------|-------------------------------------------------------------------------------------------------------------------------------------------|----------------------------------------------------------|----------------------------------------------------------------------------------------------------------------------------------------------------------------------------------------------------------------------------------------------------------------------------------------|
|                           |                                | Tuberculosis                                                      | HIV                                                                                                                                                              | STI                                                                                       | Hepatitis C                                                      | immunisation                                                                                                                              | AMR/multi-drug resistance                                | Other infectious diseases                                                                                                                                                                                                                                                              |
|                           | Sex                            | Beijer, 2012 (4)<br>Nava-Aguilera, 2009 (1)                       | Beijer, 2012 (0)<br>Operario, 2008 (0)<br>Van Gerwen, 2020 (0)<br>Leung, 2019 (unclear)<br>Eilami, 2019 (1)<br>Kabapy, 2020 (unclear)<br>McBride, 2021 (unclear) | Crichton, 2015 (3)<br>Van Gerwen, 2020 (0)<br>Whelan, 2021 (1)<br>McBride, 2021 (unclear) | Beijer, 2012 (1)<br>Colledge, 2020 (16)<br>Leung, 2019 (unclear) | Pulver, 2016 (1)<br>Tabacchi, 2016 (19)<br>Nagata, 2013 (unclear, at least 1)<br>Roller-Wirnsberger, 2021 (at least 1)<br>Faria, 2021 (0) | Abraha, 2018 (unclear, at least 1)<br>Faustini, 2005 (3) | Leung, 2019 (unclear)<br>Aldridge, 2018 (unclear, at least 1)<br>Ly, 2021 (4)<br>Spyromitrou-Xioufi, 2020 (0)<br>Possenti, 2016 (0)<br>Richterman, 2018 (0)<br>Rostami, 2021 (2)<br>Schierhout, 2020 (0)<br>Fauroux, 2017 (8)<br>Rostami, 2019a (2)<br>Badri, 2021 (4)<br>Li, 2020 (7) |
|                           | Marriage and civil partnership |                                                                   |                                                                                                                                                                  |                                                                                           |                                                                  | Okoli, 2020 (1)<br>Nagata, 2013 (unclear, at least 1)<br>Jain, 2017 (5)<br>Tabacchi, 2016 (19)<br>Okoli, 2021 (2)<br>Faria, 2021 (0)      |                                                          |                                                                                                                                                                                                                                                                                        |
|                           | Pregnancy and maternity        |                                                                   |                                                                                                                                                                  |                                                                                           |                                                                  | Hahne, 2013 (9)<br>Greenaway, 2015 (0)                                                                                                    |                                                          |                                                                                                                                                                                                                                                                                        |

| Dimension of inequalities | Variables           | Infectious diseases: Author, year (number of UK studies included)             |                                                         |                               |             |                                                                                                                                                                                                                                               |                                    |                                 |
|---------------------------|---------------------|-------------------------------------------------------------------------------|---------------------------------------------------------|-------------------------------|-------------|-----------------------------------------------------------------------------------------------------------------------------------------------------------------------------------------------------------------------------------------------|------------------------------------|---------------------------------|
|                           |                     | Tuberculosis                                                                  | HIV                                                     | STI                           | Hepatitis C | immunisation                                                                                                                                                                                                                                  | AMR/multi-drug resistance          | Other infectious diseases       |
|                           |                     |                                                                               |                                                         |                               |             |                                                                                                                                                                                                                                               |                                    | Nourollahpour Shiadeh, 2020 (0) |
|                           | Race (or ethnicity) | Nava-Aguilera, 2009 (1)<br>Offer, 2015 (18) <sup>a</sup><br>Kawatsu, 2014 (1) | Millett, 2012 (13)<br>Prost, 2007 (unclear, at least 3) | Wayal, 2018 (15) <sup>a</sup> |             | Vet, 2015 (0)<br>Okoli, 2020 (1)<br>Gorjana, 2017 (1)<br>Fernández, 2015 (8)<br>Fisher, 2013 (1)<br>Tabacchi, 2016 (19)<br>Nagata, 2013 (unclear, at least 1)<br>Falagas, 2008 (1)<br>Tauli, 2016 (0)<br>Malerba, 2015 (0)<br>Okoli, 2021 (2) | Abraha, 2018 (unclear, at least 1) | Ly, 2021 (4)                    |
|                           | Religion or belief  |                                                                               |                                                         |                               |             | Fisher, 2013 (1)<br>Jain, 2017 (5)<br>Fournet, 2018 (unclear, at least 1)<br>Malerba, 2015 (0)<br>Falagas, 2008 (1)                                                                                                                           |                                    | Spyromitrou-Xioufi, 2020 (0)    |

| Dimension of inequalities | Variables           | Infectious diseases: Author, year (number of UK studies included)                                               |                                                                                                                                   |                                                                                                 |                                                                                                                     |                                                                                                  |                                         |                                                                                                                                                   |
|---------------------------|---------------------|-----------------------------------------------------------------------------------------------------------------|-----------------------------------------------------------------------------------------------------------------------------------|-------------------------------------------------------------------------------------------------|---------------------------------------------------------------------------------------------------------------------|--------------------------------------------------------------------------------------------------|-----------------------------------------|---------------------------------------------------------------------------------------------------------------------------------------------------|
|                           |                     | Tuberculosis                                                                                                    | HIV                                                                                                                               | STI                                                                                             | Hepatitis C                                                                                                         | immunisation                                                                                     | AMR/multi-drug resistance               | Other infectious diseases                                                                                                                         |
|                           | Sexual orientation  |                                                                                                                 | Fakoya, 2015 (9)<br>Oldenburg, 2014 (1)<br>Operario, 2008 (0)<br>Chen, 2019 (1)                                                   |                                                                                                 | Hahne, 2013 (9)<br>Jin, 2020 (at least 14)                                                                          |                                                                                                  | Abraha, 2018 (unclear, at least 1)      | Hahne, 2013 (9)<br>Leumi, 2020 (unclear)<br>Ly, 2021 (4)<br>Stockdale, 2020 (unclear, at least 1)                                                 |
|                           | Gender reassignment |                                                                                                                 | Operario, 2008 (0)                                                                                                                |                                                                                                 |                                                                                                                     |                                                                                                  |                                         | Leumi, 2020 (unclear)                                                                                                                             |
|                           | Disability          |                                                                                                                 |                                                                                                                                   |                                                                                                 |                                                                                                                     |                                                                                                  |                                         | Newman, 2015 (3)                                                                                                                                  |
| Inclusion Health Groups   | Vulnerable migrants |                                                                                                                 | Yu, 2020 (0)                                                                                                                      | Yu, 2020 (0)                                                                                    | Chernet,2017 (unclear)<br>Greenaway, 2015 (0)                                                                       | Mipatrini, 2017 (7)<br>De Vito, 2017 (4)                                                         | Nellums, 2018 (0)                       | Rossi, 2012 (2)<br>Chernet,2017 (unclear)<br>Mipatrini, 2017 (7)<br>Chernet,2017 (unclear)                                                        |
|                           | General migrants    | Tavares, 2017 (2) <sup>β</sup><br>Chan, 2017 (1)<br>Kawatsu, 2014 (1)<br>Sandgren, 2014(1)<br>Jackson, 2021 (3) | Tavares, 2017 (2) <sup>β</sup><br>Platt, 2013a (1)<br>Platt, 2013b (5)<br>Prost, 2007 (unclear, at least 3)<br>Kentikelenis, 2015 | Platt, 2011a (1)<br>Platt, 2013b (5)<br>Kentikelenis, 2015 (unclear)<br>McBride, 2021 (unclear) | Hahne, 2013 (9)<br>Chernet,2017 (unclear)<br>Greenaway, 2015 (0)<br>Kentikelenis, 2015 (unclear)<br>Falla, 2018 (1) | Okoli, 2020 (1)<br>Mipatrini, 2017 (7)<br>De Vito, 2017 (4)<br>Jain, 2017 (5)<br>Tauli, 2016 (0) | Faustini, 2005 (3)<br>Jackson, 2021 (3) | Rossi, 2012 (2)<br>Hahne, 2013 (9)<br>Chernet,2017 (unclear)<br>Kentikelenis, 2015 (unclear)<br>Suhrcke, 2011 (unclear)<br>Morais, 2017 (unclear) |

| Dimension of inequalities | Variables                                            | Infectious diseases: Author, year (number of UK studies included) |                                                                                     |                              |                                    |                                     |                                      |                                                                                 |
|---------------------------|------------------------------------------------------|-------------------------------------------------------------------|-------------------------------------------------------------------------------------|------------------------------|------------------------------------|-------------------------------------|--------------------------------------|---------------------------------------------------------------------------------|
|                           |                                                      | Tuberculosis                                                      | HIV                                                                                 | STI                          | Hepatitis C                        | immunisation                        | AMR/multi-drug resistance            | Other infectious diseases                                                       |
|                           |                                                      |                                                                   | (unclear)<br>Pega 2021 (1)<br>Kabapy, 2020 (unclear)<br>McBride, 2021 (unclear)     |                              |                                    |                                     |                                      |                                                                                 |
|                           | People experiencing homelessness and rough sleeping  | Beijer, 2012 (4)<br>Nava-Aguilera, 2009 (1)<br>Kawatsu, 2014 (1)  | Beijer, 2012 (0)<br>Arum, 2021 (6)                                                  |                              | Beijer, 2012 (1)<br>Arum, 2021 (6) |                                     | Alividza, 2018 (unclear, at least 2) | Aldridge, 2018 (unclear, at least 1)<br>Suhrcke, 2011 (unclear)<br>Ly, 2021 (4) |
|                           | People who engage in sex work                        |                                                                   | Yu, 2020 (0)<br>Oldenburg, 2015 (0)<br>Operario, 2008 (0)<br>Kabapy, 2020 (unclear) | Yu, 2020 (0)<br>Wu, 2021 (0) |                                    | Vet, 2015 (0)                       |                                      | Leumi, 2020 (unclear)<br>Stockdale, 2020 (unclear, at least 1)                  |
|                           | Gypsy Roma/ Traveller communities /Indigenous people | Tollefson, 2013 (0)<br>Cormier 2019 (0)                           |                                                                                     |                              |                                    | Fournet, 2018 (unclear, at least 1) |                                      |                                                                                 |

| Dimension of inequalities  | Variables                 | Infectious diseases: Author, year (number of UK studies included) |                                                                                                |                    |             |                                                                                                                                                                                                                                                                                                                                                                                                                       |                                                                                      |                                                                                                                                                                                                                                    |
|----------------------------|---------------------------|-------------------------------------------------------------------|------------------------------------------------------------------------------------------------|--------------------|-------------|-----------------------------------------------------------------------------------------------------------------------------------------------------------------------------------------------------------------------------------------------------------------------------------------------------------------------------------------------------------------------------------------------------------------------|--------------------------------------------------------------------------------------|------------------------------------------------------------------------------------------------------------------------------------------------------------------------------------------------------------------------------------|
|                            |                           | Tuberculosis                                                      | HIV                                                                                            | STI                | Hepatitis C | immunisation                                                                                                                                                                                                                                                                                                                                                                                                          | AMR/multi-drug resistance                                                            | Other infectious diseases                                                                                                                                                                                                          |
| Socioeconomic inequalities | Level of education/income | Kawatsu, 2014 (1)                                                 | Rodrigo, 2010 (unclear)<br>Ghiasvand, 2020 (0)<br>Millett, 2012 (13)<br>Kabapy, 2020 (unclear) | Crichton, 2015 (3) |             | Vet, 2015 (0)<br>Larson, 2014 (at least one)<br>Okoli, 2020 (1)<br>Arat, 2019 (2)<br>Fernández, 2015 (8)<br>Forshaw, 2017 (0)<br>Fisher, 2013 (1)<br>Tabacchi, 2016 (19)<br>Nagata, 2013 (unclear, at least 1)<br>Lucyk, 2019 (1)<br>De Vito, 2017 (4)<br>Bocquier, 2017 (5)<br>Jain, 2017 (5)<br>Tauli, 2016 (0)<br>Malerba, 2015 (0)<br>Okoli, 2021 (2)<br>Roller-Wirnsberger, 2021 (at least 1)<br>Faria, 2021 (0) | Di Gennaro, 2017 (1)<br>Alividza, 2018 (unclear, at least 2)<br>Najafizada, 2020 (4) | Ding, 2020 (0)<br>Coffey, 2018 (unclear)<br>Adams, 2018 (unclear, at least 1)<br>Newman, 2015 (3)<br>Possenti, 2016 (0)<br>Richterman, 2018 (0)<br>Spyromitrou-Xioufi, 2020 (0)<br>Dong, 2020 (unclear)<br>Suhrcke, 2011 (unclear) |

| Dimension of inequalities | Variables                                    | Infectious diseases: Author, year (number of UK studies included) |                                                    |                                                    |                              |                                                                                                                                                                                                                                                 |                           |                                                                                                                                 |
|---------------------------|----------------------------------------------|-------------------------------------------------------------------|----------------------------------------------------|----------------------------------------------------|------------------------------|-------------------------------------------------------------------------------------------------------------------------------------------------------------------------------------------------------------------------------------------------|---------------------------|---------------------------------------------------------------------------------------------------------------------------------|
|                           |                                              | Tuberculosis                                                      | HIV                                                | STI                                                | Hepatitis C                  | immunisation                                                                                                                                                                                                                                    | AMR/multi-drug resistance | Other infectious diseases                                                                                                       |
|                           | Employment /occupation                       | Kawatsu, 2014 (1)                                                 | Kentikelenis, 2015 (unclear)<br>Millett, 2012 (13) | Crichton, 2015 (3)<br>Kentikelenis, 2015 (unclear) | Kentikelenis, 2015 (unclear) | Arat, 2019 (2)<br>Tabacchi, 2016 (19)<br>Nagata, 2013 (unclear, at least 1)<br>Lucyk, 2019 (1)<br>De Vito, 2017 (4)<br>Bocquier, 2017 (5)<br>Tauli, 2016 (0)<br>Malerba, 2015 (0)<br>Okoli, 2021 (2)<br>Faria, 2021 (0)                         |                           | Kentikelenis, 2015 (unclear)<br>Li, 2020 (7)<br>Coffey, 2018 (unclear)<br>Adams, 2018 (unclear, at least 1)<br>Newman, 2015 (3) |
|                           | Social class/Area level socioeconomic status |                                                                   | Salgado-Barreira, 2014 (1) <sup>y</sup>            |                                                    |                              | Arat, 2019 (2)<br>Okoli, 2020 (1)<br>Fernández, 2015 (8)<br>Nagata, 2013 (unclear, at least 1)<br>Lucyk, 2019 (1)<br>Jain, 2017 (5)<br>Falagas, 2008 (1)<br>Tauli, 2016 (0)<br>Malerba, 2015 (0)<br>Okoli, 2021 (2)<br>Roller-Wirnsberger, 2021 |                           | Salgado-Barreira, 2014 (1)                                                                                                      |

| Dimension of inequalities | Variables                                                                                                        | Infectious diseases: Author, year (number of UK studies included) |     |                    |             |                                                                                                                                                              |                                                              |                                                                                                                                                                                                                                  |
|---------------------------|------------------------------------------------------------------------------------------------------------------|-------------------------------------------------------------------|-----|--------------------|-------------|--------------------------------------------------------------------------------------------------------------------------------------------------------------|--------------------------------------------------------------|----------------------------------------------------------------------------------------------------------------------------------------------------------------------------------------------------------------------------------|
|                           |                                                                                                                  | Tuberculosis                                                      | HIV | STI                | Hepatitis C | immunisation                                                                                                                                                 | AMR/multi-drug resistance                                    | Other infectious diseases                                                                                                                                                                                                        |
|                           | Deprivation                                                                                                      | Offer, 2015 (18) <sup>a</sup>                                     |     | Crichton, 2015 (3) |             | Vukovic, 2019 (6)<br>Fisher, 2013 (1)<br>Nagata, 2013 (unclear, at least 1)<br>Lucyk, 2019 (1)                                                               |                                                              | Adams, 2018 (unclear, at least 1)<br>Newman, 2015 (3)                                                                                                                                                                            |
|                           | Residence/living situation (e.g urban vs rural, living in a home environment with moisture damage, house tenure) | Nava-Aguilera, 2009 (1)<br>Cormier 2019 (0)                       |     |                    |             | Okoli, 2020 (1)<br>Fernández, 2015 (8)<br>Tabacchi, 2016 (19)<br>Nagata, 2013 (unclear, at least 1)<br>Tauli, 2016 (0)<br>Okoli, 2021 (2)<br>Faria, 2021 (0) | Alividza, 2018 (unclear, at least 2)<br>Najafizada, 2020 (4) | Ly, 2021 (4)<br>Dong, 2020 (unclear)<br>Spyromitrou-Xioufi, 2020 (0)<br>Newman, 2015 (3)<br>Possenti, 2016 (0)<br>Richterman, 2018 (0)<br>Coffey, 2018 (unclear)<br>Rostami, 2021 (2)<br>Fauroux, 2017 (8)<br>Rostami, 2019a (2) |
