# Supplementary material for: Health inequalities in infectious diseases: a systematic overview of reviews
Source: PubMed Central journal article supplement — BMJ Open. 2023 Apr 4;13(4):e067429. doi: 10.1136/bmjopen-2022-067429 (PMC10083762; doi:10.1136/bmjopen-2022-067429), 2023-04-04
Supplement: bmjopen-2022-067429supp004.pdf [file bmjopen-2022-067429supp004.pdf]

**Online supplemental file 4: ASSESSMENT OF INDIVIDUAL REVIEWS USING ASSESSMENT OF MULTIPLE SYSTEMATIC REVIEWS VERSION 2 (AMSTAR2) CHECKLIST**

| Study ID<br>(Author, Year) | 1 | 2   | 3 | 4   | 5 | 6 | 7 | 8   | 9   | 10 | 11    | 12    | 13 | 14 | 15    | 16 |
|----------------------------|---|-----|---|-----|---|---|---|-----|-----|----|-------|-------|----|----|-------|----|
| Tavares, 2017              | Y | N   | Y | P Y | N | N | N | Y   | N   | N  | N M C | N M C | Y  | N  | N M C | Y  |
| Tollefson, 2013            | Y | N   | N | P Y | Y | Y | N | Y   | N   | N  | N M C | N M C | N  | N  | N M C | Y  |
| Vet, 2015                  | Y | N   | N | P Y | N | N | N | P Y | Y   | N  | N M C | N M C | Y  | N  | N M C | Y  |
| Beijer 2012                | Y | N   | N | P Y | N | Y | N | Y   | N   | N  | Y     | Y     | N  | Y  | N     | Y  |
| Behera, 2018               | Y | N   | N | P Y | N | N | N | N   | N   | N  | N M C | N M C | N  | N  | N M C | Y  |
| Vukovic, 2019              | Y | N   | N | P Y | Y | Y | N | Y   | Y   | N  | N M C | N M C | N  | N  | N M C | Y  |
| Platt, 2013a               | Y | N   | N | P Y | N | N | N | Y   | P Y | N  | N M C | N M C | Y  | Y  | N M C | Y  |
| Platt, 2013b               | Y | N   | N | Y   | N | N | N | N   | P Y | N  | N M C | N M C | Y  | Y  | N M C | Y  |
| Prost, 2007                | Y | N   | N | Y   | N | N | N | P Y | N   | N  | N M C | N M C | N  | N  | N M C | N  |
| Pulver, 2016               | Y | N   | N | P Y | Y | Y | N | Y   | N   | N  | N M C | N M C | Y  | Y  | N M C | N  |
| Rossi, 2012                | Y | P Y | N | Y   | Y | Y | N | P Y | N   | N  | Y     | N     | N  | Y  | N     | Y  |
| Rostami, 2019              | Y | Y   | N | P Y | N | Y | N | P Y | N   | N  | Y     | N     | Y  | Y  | Y     | Y  |
| Di Gennaro, 2017           | Y | N   | N | P Y | N | Y | N | Y   | Y   | N  | Y     | Y     | Y  | Y  | Y     | N  |
| Fauroux, 2017              | Y | P Y | N | Y   | N | N | N | Y   | Y   | N  | N M C | N M C | Y  | Y  | N M C | Y  |

| Study ID<br>(Author, Year) | 1 | 2   | 3 | 4   | 5 | 6 | 7 | 8   | 9   | 10 | 11    | 12    | 13 | 14 | 15    | 16 |
|----------------------------|---|-----|---|-----|---|---|---|-----|-----|----|-------|-------|----|----|-------|----|
| Hahne, 2013                | Y | P Y | N | P Y | N | Y | N | N   | P Y | N  | N M C | N M C | N  | Y  | N M C | Y  |
| Jin, 20                    | Y | Y   | N | P Y | Y | N | N | N   | P Y | N  | Y     | Y     | Y  | Y  | N     | Y  |
| Larson, 2014               | N | N   | N | P Y | N | N | N | N   | N   | N  | N M C | N M C | N  | N  | N M C | Y  |
| Nava-Aguilera,<br>2009     | N | N   | N | P Y | N | Y | N | Y   | Y   | N  | Y     | Y     | Y  | Y  | Y     | N  |
| Okoli, 2020                | Y | Y   | N | P Y | Y | Y | N | Y   | Y   | N  | Y     | Y     | Y  | Y  | Y     | Y  |
| Schierhout,<br>2020        | N | N   | N | P Y | Y | N | N | P Y | Y   | N  | Y     | Y     | Y  | Y  | Y     | Y  |
| Wayal, 2018                | Y | N   | N | Y   | N | Y | N | Y   | Y   | N  | N M C | N M C | Y  | Y  | N M C | Y  |
| Yu, 2020                   | Y | N   | N | P Y | N | N | N | Y   | N   | N  | N M C | N M C | N  | N  | N M C | Y  |
| Gorjana, 2017              | Y | N   | N | P Y | N | N | N | Y   | Y   | N  | N M C | N M C | Y  | Y  | N M C | Y  |
| Rodrigo, 2010              | Y | N   | N | P Y | N | Y | N | N   | N   | N  | N M C | N M C | N  | N  | N M C | Y  |
| Rostami, 2019b             | Y | Y   | N | Y   | Y | Y | N | Y   | N   | N  | Y     | Y     | N  | Y  | N     | Y  |
| Coffey, 2018               | Y | N   | N | P Y | N | N | N | N   | Y   | N  | N M C | N M C | N  | Y  | N M C | N  |
| Ghiasvand,<br>2020         | Y | N   | N | P Y | Y | N | N | P Y | Y   | N  | Y     | Y     | Y  | Y  | Y     | Y  |
| Cormier 2019               | Y | N   | N | P Y | Y | N | N | N   | N   | N  | N M C | N M C | N  | N  | N M C | Y  |
| Abraha, 2018               | Y | N   | N | N   | N | N | N | N   | N   | N  | N M C | N M C | N  | Y  | N M C | N  |

| Study ID<br>(Author, Year) | 1 | 2   | 3 | 4   | 5 | 6 | 7 | 8   | 9   | 10 | 11    | 12    | 13 | 14 | 15    | 16 |
|----------------------------|---|-----|---|-----|---|---|---|-----|-----|----|-------|-------|----|----|-------|----|
| Adams, 2018                | Y | Y   | N | Y   | Y | N | N | P Y | Y   | N  | Y     | Y     | Y  | Y  | Y     | N  |
| Aldridge, 2018             | N | N   | N | N   | N | Y | N | N   | N   | N  | Y     | N     | N  | Y  | N     | Y  |
| Alividza, 2018             | Y | N   | N | P Y | Y | N | N | Y   | Y   | N  | N M C | N M C | Y  | N  | N M C | Y  |
| Arat, 2019                 | Y | N   | N | P Y | Y | N | N | Y   | N   | N  | N M C | N M C | Y  | Y  | N M C | Y  |
| Chan, 2017                 | Y | N   | N | N   | Y | Y | N | N   | Y   | N  | Y     | Y     | Y  | Y  | N     | Y  |
| Chernet, 2017              | N | N   | N | P Y | Y | N | N | N   | N   | N  | N     | N     | N  | Y  | N     | Y  |
| Colledge, 2020             | Y | N   | N | N   | N | N | N | N   | N   | N  | N M C | N M C | N  | N  | N M C | Y  |
| Crichton, 2015             | Y | P Y | Y | P Y | N | N | N | N   | P Y | N  | Y     | Y     | Y  | Y  | N     | Y  |
| Eilami, 2019               | Y | N   | N | P Y | N | N | N | N   | N   | N  | Y     | N     | N  | Y  | Y     | Y  |
| Fakoya, 2015               | Y | P Y | N | P Y | Y | N | N | P Y | N   | N  | N M C | N M C | Y  | N  | N M C | Y  |
| Faustini, 2005             | Y | N   | N | P Y | N | N | N | N   | N   | N  | Y     | N     | N  | Y  | N     | Y  |
| Fernández,<br>2015         | Y | N   | N | P Y | N | N | N | Y   | N   | N  | N M C | Y     | Y  | N  | N M C | Y  |
| Forshaw, 2017              | Y | N   | N | P Y | Y | N | N | Y   | P Y | N  | Y     | N     | Y  | Y  | Y     | Y  |
| Fisher, 2013               | Y | N   | N | P Y | N | N | N | Y   | N   | N  | Y     | Y     | Y  | Y  | N     | Y  |
| Greenaway,<br>2015         | Y | N   | N | P Y | N | N | N | N   | Y   | N  | Y     | N     | N  | Y  | N     | Y  |

| Study ID<br>(Author, Year) | 1 | 2   | 3 | 4   | 5 | 6 | 7 | 8   | 9   | 10 | 11    | 12    | 13 | 14 | 15    | 16 |
|----------------------------|---|-----|---|-----|---|---|---|-----|-----|----|-------|-------|----|----|-------|----|
| Sandgren, 2014.            | Y | N   | N | P Y | Y | Y | N | Y   | N   | N  | Y     | N     | N  | Y  | N     | N  |
| Schepisi, 2018.            | Y | Y   | N | P Y | Y | N | N | N   | Y   | N  | Y     | N     | N  | Y  | N     | Y  |
| Suhrcke, 2011.             | Y | N   | N | Y   | Y | Y | N | Y   | N   | N  | N M C | N M C | N  | Y  | N M C | Y  |
| Stockdale, 2020.           | Y | Y   | N | Y   | Y | Y | N | N   | P Y | N  | Y     | Y     | Y  | Y  | N     | Y  |
| Tabacchi                   | Y | N   | N | Y   | N | N | N | Y   | N   | N  | Y     | N     | N  | Y  | Y     | Y  |
| Strifler                   | Y | N   | N | P Y | Y | Y | N | Y   | Y   | N  | N M C | N M C | N  | Y  | N M C | N  |
| Nagata, 2011               | Y | P Y | N | P Y | N | Y | N | N   | P Y | N  | N M C | N M C | N  | Y  | N M C | Y  |
| Nellums, 2018              | Y | Y   | N | P Y | Y | Y | N | Y   | P Y | N  | Y     | Y     | Y  | Y  | N     | Y  |
| Newman, 2015               | Y | Y   | N | P Y | Y | Y | N | P Y | Y   | N  | Y     | Y     | Y  | Y  | Y     | Y  |
| Oldenburg, 2014            | Y | P Y | N | Y   | N | Y | N | N   | Y   | N  | Y     | N     | Y  | Y  | Y     | Y  |
| Oldenburg_2015             | Y | N   | N | P Y | N | Y | N | N   | N   | N  | Y     | N     | N  | Y  | N     | Y  |
| Operario 2008              | Y | N   | N | Y   | Y | Y | N | N   | P Y | N  | Y     | N     | N  | Y  | Y     | N  |
| Offer_2015                 | Y | N   | N | P Y | Y | Y | N | Y   | N   | N  | N M C | N M C | N  | N  | N M C | N  |
| Mipatrini, 2017            | N | N   | Y | N   | Y | N | N | N   | N   | N  | N M C | N M C | N  | N  | N M C | Y  |
| Lucyk, 2019.               | N | N   | N | N   | Y | N | N | P Y | P Y | N  | N M C | N M C | Y  | N  | N M C | Y  |

| Study ID<br>(Author, Year)   | 1 | 2 | 3 | 4   | 5 | 6 | 7 | 8   | 9   | 10 | 11    | 12    | 13 | 14 | 15    | 16 |
|------------------------------|---|---|---|-----|---|---|---|-----|-----|----|-------|-------|----|----|-------|----|
| De Vito, 2017                | Y | N | Y | P Y | N | N | N | N   | N   | N  | N M C | N M C | N  | N  | N M C | N  |
| Bocquier, 2017               | Y | N | N | P Y | Y | N | N | N   | N   | N  | N M C | N M C | Y  | Y  | N M C | Y  |
| Morais, 2017                 | Y | Y | N | N   | Y | Y | N | N   | N   | N  | N M C | N M C | N  | N  | N M C | Y  |
| Spyromitrou-<br>Xioufi, 2020 | Y | N | N | N   | Y | Y | N | Y   | P Y | N  | Y     | Y     | Y  | Y  | Y     | Y  |
| Van Gerwen,<br>2020          | Y | N | N | N   | Y | N | N | Y   | N   | N  | Y     | N     | N  | Y  | N     | N  |
| Zamani, 2018.                | N | N | N | N   | Y | N | N | N   | N   | N  | Y     | N     | N  | Y  | N     | Y  |
| Jain, 2017                   | Y | N | N | Y   | N | N | N | Y   | Y   | N  | Y     | Y     | Y  | Y  | Y     | Y  |
| Kentikelenis,<br>2015        | Y | N | N | Y   | N | N | N | N   | N   | N  | N M C | N M C | N  | N  | N M C | Y  |
| Li, P. 2020                  | Y | N | N | P Y | Y | Y | N | Y   | Y   | N  | Y     | Y     | Y  | Y  | Y     | Y  |
| Leung,2019                   | Y | Y | N | Y   | N | N | N | P Y | N   | N  | Y     | N     | N  | Y  | N     | Y  |
| Lindsay,2015                 | Y | N | N | P Y | N | N | N | Y   | N   | N  | N M C | N M C | N  | N  | N M C | Y  |
| Salgado-<br>Barreira         | Y | N | N | P Y | Y | N | N | Y   | N   | N  | N M C | N M C | Y  | Y  | N M C | N  |
| Fournet, 2018.               | N | N | N | N   | Y | N | N | N   | N   | N  | N M C | N M C | N  | N  | N M C | Y  |
| Bonten et al.,<br>2020       | Y | N | N | P Y | N | N | N | N   | N   | N  | Y     | N     | N  | Y  | N     | Y  |

| Study ID<br>(Author, Year)        | 1 | 2 | 3 | 4   | 5 | 6 | 7 | 8   | 9   | 10 | 11    | 12    | 13 | 14 | 15    | 16 |
|-----------------------------------|---|---|---|-----|---|---|---|-----|-----|----|-------|-------|----|----|-------|----|
| Chen et al.,<br>2019              | N | N | N | P Y | N | Y | N | N   | Y   | N  | Y     | Y     | Y  | Y  | Y     | Y  |
| Denning et al.,<br>2018           | N | N | N | Y   | Y | N | N | P Y | P Y | N  | Y     | Y     | N  | N  | N     | Y  |
| Falagas &<br>Zarkadoulia,<br>2008 | Y | N | N | P Y | N | N | N | Y   | N   | N  | N M C | N M C | N  | Y  | N M C | N  |
| Falla et al.,<br>2018             | N | N | N | P Y | N | N | N | N   | P Y | N  | N M C | N M C | N  | Y  | N M C | Y  |
| Hermann et al.,<br>2019           | Y | Y | N | Y   | Y | N | N | N   | Y   | N  | N M C | N M C | Y  | Y  | N M C | N  |
| Millett et al.,<br>2012           | Y | N | N | Y   | N | N | N | N   | N   | N  | Y     | N     | Y  | N  | N     | Y  |
| Kawatsu, 2014                     | Y | N | N | N   | N | N | N | P Y | N   | N  | N M C | N M C | N  | Y  | N M C | Y  |
| Possenti, 2016                    | N | N | N | P Y | N | Y | N | N   | P Y | N  | Y     | Y     | Y  | Y  | Y     | Y  |
| Richterman,<br>2018               | Y | N | N | P Y | Y | Y | N | N   | Y   | N  | Y     | Y     | Y  | Y  | Y     | Y  |
| Tauli, 2016                       | Y | N | N | P Y | N | N | N | Y   | N   | N  | N M C | N M C | N  | N  | N M C | Y  |
| Malerba, 2015                     | Y | N | N | Y   | Y | Y | N | P Y | N   | N  | N M C | N M C | N  | N  | N M C | Y  |
| Leumi, 2020                       | Y | Y | N | Y   | Y | Y | N | Y   | Y   | N  | Y     | Y     | Y  | Y  | Y     | Y  |

| Study ID<br>(Author, Year) | 1 | 2   | 3 | 4   | 5 | 6 | 7   | 8   | 9   | 10 | 11    | 12    | 13 | 14 | 15    | 16 |
|----------------------------|---|-----|---|-----|---|---|-----|-----|-----|----|-------|-------|----|----|-------|----|
| Arum, 2021                 | Y | Y   | N | P Y | Y | Y | N   | Y   | Y   | N  | Y     | Y     | Y  | Y  | Y     | Y  |
| Mirzadehd,<br>2021         | Y | N   | N | Y   | Y | N | N   | P Y | Y   | N  | Y     | Y     | Y  | Y  | Y     | Y  |
| Macina, 2021               | Y | N   | N | Y   | N | N | N   | Y   | N   | N  | N M C | N M C | N  | N  | N M C | Y  |
| Ly, 2021                   | Y | Y   | N | Y   | Y | N | N   | Y   | N   | N  | N M C | N M C | N  | N  | N M C | Y  |
| Lafond, 2021               | Y | P Y | N | Y   | Y | N | N   | N   | P Y | N  | Y     | Y     | Y  | Y  | N     | Y  |
| McBride                    | Y | N   | N | P Y | N | N | N   | Y   | N   | N  | N M C | N M C | N  | N  | N M C | Y  |
| Ding 2020                  | Y | N   | N | Y   | Y | N | N   | Y   | Y   | N  | Y     | Y     | Y  | Y  | Y     | Y  |
| Sultana 2021               | Y | Y   | N | N   | Y | Y | P Y | Y   | Y   | N  | Y     | Y     | Y  | Y  | Y     | Y  |
| Whelan 2021                | Y | N   | N | N   | Y | N | N   | Y   | N   | N  | N M C | N M C | N  | Y  | N M C | Y  |
| Faria 2021                 | Y | Y   | N | P Y | Y | Y | N   | Y   | Y   | N  | Y     | Y     | Y  | Y  | N     | Y  |
| Jackson 2021               | Y | Y   | N | P Y | Y | Y | N   | Y   | Y   | N  | Y     | Y     | Y  | Y  | N     | Y  |
| Badri 2021                 | Y | N   | N | N   | Y | N | N   | P Y | Y   | N  | Y     | Y     | Y  | Y  | Y     | Y  |
| Dugan 2021                 | Y | N   | N | P Y | N | N | N   | N   | P Y | N  | N M C | N M C | Y  | N  | N M C | Y  |
| Kabapy 2020                | Y | Y   | N | P Y | Y | Y | N   | N   | Y   | N  | Y     | Y     | Y  | Y  | Y     | Y  |
| Dong 2020                  | Y | N   | Y | N   | Y | Y | N   | N   | Y   | N  | Y     | N     | Y  | N  | N     | Y  |
| Najafizada,<br>2020        | N | N   | N | N   | N | N | N   | N   | N   | N  | N M C | N M C | N  | N  | N M C | Y  |

| Study ID<br>(Author, Year)    | 1 | 2   | 3 | 4   | 5 | 6 | 7 | 8   | 9 | 10 | 11    | 12    | 13 | 14 | 15    | 16 |
|-------------------------------|---|-----|---|-----|---|---|---|-----|---|----|-------|-------|----|----|-------|----|
| Nurollahpour<br>Shiadeh, 2020 | Y | N   | N | P Y | Y | Y | N | P Y | Y | N  | Y     | Y     | Y  | Y  | N     | Y  |
| Pega 2021                     | Y | P Y | N | P Y | Y | Y | N | Y   | Y | N  | Y     | Y     | Y  | Y  | N     | N  |
| Rostami 2021                  | Y | N   | N | P Y | Y | Y | N | P Y | Y | N  | Y     | Y     | Y  | Y  | Y     | Y  |
| Song, 2021                    | Y | N   | N | P Y | Y | Y | N | Y   | Y | N  | Y     | Y     | Y  | Y  | N     | Y  |
| Wu 2021                       | Y | Y   | Y | Y   | Y | Y | N | Y   | Y | N  | Y     | Y     | Y  | Y  | Y     | Y  |
| Okoli 2020                    | Y | N   | N | N   | Y | Y | N | P Y | Y | N  | Y     | Y     | Y  | Y  | Y     | Y  |
| Roller-Wirnsber<br>ger 2021   | Y | N   | Y | P Y | N | N | N | P Y | N | N  | N M C | N M C | N  | Y  | N M C | N  |

Key: Y=Yes; N=No, P Y = Partial yes and N M C = No meta-analysis conducted

AMSTAR 2 Items:

1. Did the research questions and inclusion criteria for the review include the components of PICO?
2. Did the report of the review contain an explicit statement that the review methods were established prior to the conduct of the review and did the report justify any significant deviations from the protocol?
3. Did the review authors explain their selection of the study designs for inclusion in the review?
4. Did the review authors use a comprehensive literature search strategy?
5. Did the review authors perform study selection in duplicate?
6. Did the review authors perform data extraction in duplicate?



7. Did the review authors provide a list of excluded studies and justify the exclusions?
8. Did the review authors describe the included studies in adequate detail?
9. Did the review authors use a satisfactory technique for assessing the risk of bias (RoB) in individual studies that were included in the review?"
10. Did the review authors report on the sources of funding for the studies included in the review?
11. If meta-analysis was performed did the review authors use appropriate methods for statistical combination of results?"
12. If meta-analysis was performed, did the review authors assess the potential impact of RoB in individual studies on the results of the meta-analysis or other evidence synthesis?
13. Did the review authors account for RoB in individual studies when interpreting/ discussing the results of the review?"
14. Did the review authors provide a satisfactory explanation for, and discussion of, any heterogeneity observed in the results of the review?"
15. If they performed quantitative synthesis did the review authors carry out an adequate investigation of publication bias (small study bias) and discuss its likely impact on the results of the review?"
16. Did the review authors report any potential sources of conflict of interest, including any funding they received for conducting the review?"
